# Supplementary material for: Natural Product Screening Reveals Naphthoquinone Complex I Bypass Factors
Source: PubMed Central journal article supplement (PMC5021346; doi:10.1371/journal.pone.0162686), 2016-09-13

## S1 Appendix

### Analytical Data for the Chimaphilin Family of Metabolites

#### NMR Spectroscopic Data:

- Figure S1**  $^1\text{H}$  NMR (600 MHz,  $\text{CDCl}_3$ ) spectrum of chimaphilin (**1**)  
**Figure S2**  $^{13}\text{C}$  NMR (150 MHz,  $\text{CDCl}_3$ ) spectrum for chimaphilin (**1**)  
**Figure S3**  $^1\text{H}$  NMR (600 MHz,  $\text{CDCl}_3$ ) spectrum of 3-hydroxy-chimaphilin (**2**)  
**Figure S4**  $^{13}\text{C}$  NMR (150 MHz,  $\text{CDCl}_3$ ) spectrum for 3-hydroxy-chimaphilin (**2**)  
**Figure S5**  $^1\text{H}$  NMR (600 MHz,  $\text{CDCl}_3$ ) spectrum of 3-chloro-chimaphilin (**3**)  
**Figure S6**  $^{13}\text{C}$  NMR (125 MHz,  $\text{CDCl}_3$ ) spectrum for 3-chloro-chimaphilin (**3**)  
**Figure S7** gHSQC ( $^1\text{H}$  500 MHz,  $\text{CDCl}_3$ ) spectrum for 3-chloro-chimaphilin (**3**)  
**Figure S8** gCOSY ( $^1\text{H}$  500 MHz,  $\text{CDCl}_3$ ) spectrum for 3-chloro-chimaphilin (**3**)  
**Figure S9** gHMBC ( $^1\text{H}$  500 MHz,  $\text{CDCl}_3$ ) spectrum for 3-chloro-chimaphilin (**3**)  
**Table S1**  $^1\text{H}$  and  $^{13}\text{C}$  NMR data table for 3-chloro-chimaphilin (**3**) in  $\text{CDCl}_3$   
**Table S2**  $^1\text{H}$  and  $^{13}\text{C}$  NMR assignments for chimaphilin (**1**), 3-hydroxy-chimaphilin (**2**), and 3-chloro-chimaphilin (**3**) in  $\text{CDCl}_3$

#### HRESIMS Data:

- Figure S10** HRESIMS spectrum for chimaphilin (**1**)  
**Figure S11** HRESIMS spectrum for 3-hydroxy-chimaphilin (**2**)  
**Figure S12** HRESIMS spectrum for 3-chloro-chimaphilin (**3**)

S1:  $^1\text{H}$  NMR (600 MHz,  $\text{CDCl}_3$ ) spectrum of chimaphilin (1)

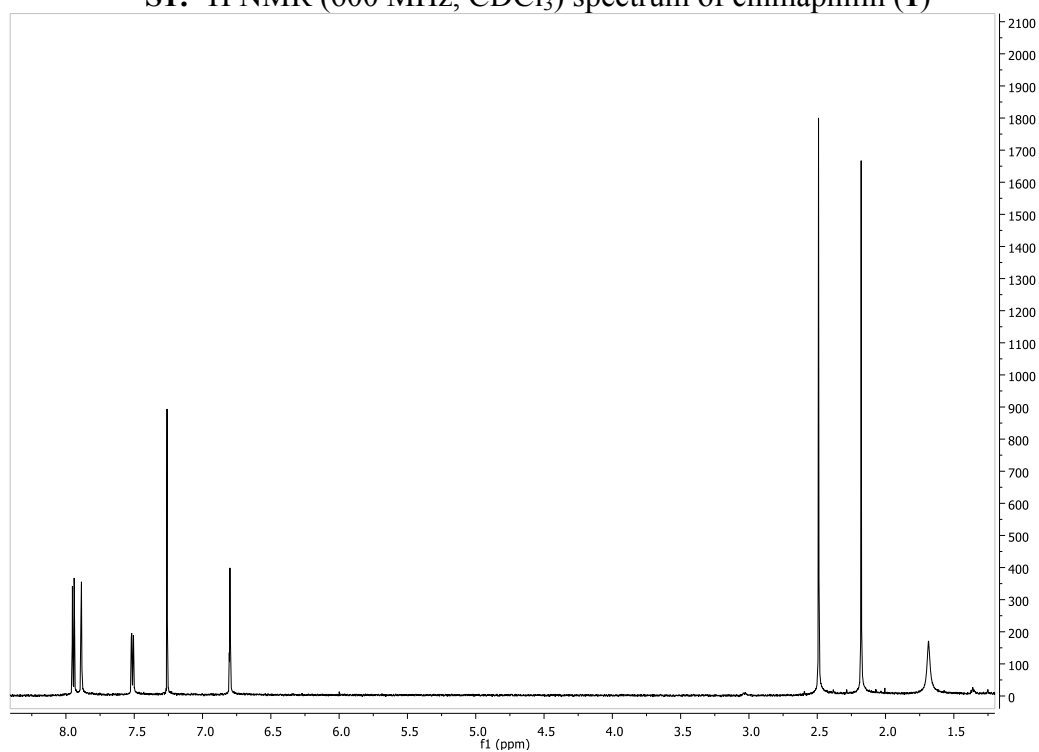

S2:  $^{13}\text{C}$  NMR (150 MHz,  $\text{CDCl}_3$ ) spectrum for chimaphilin (1)

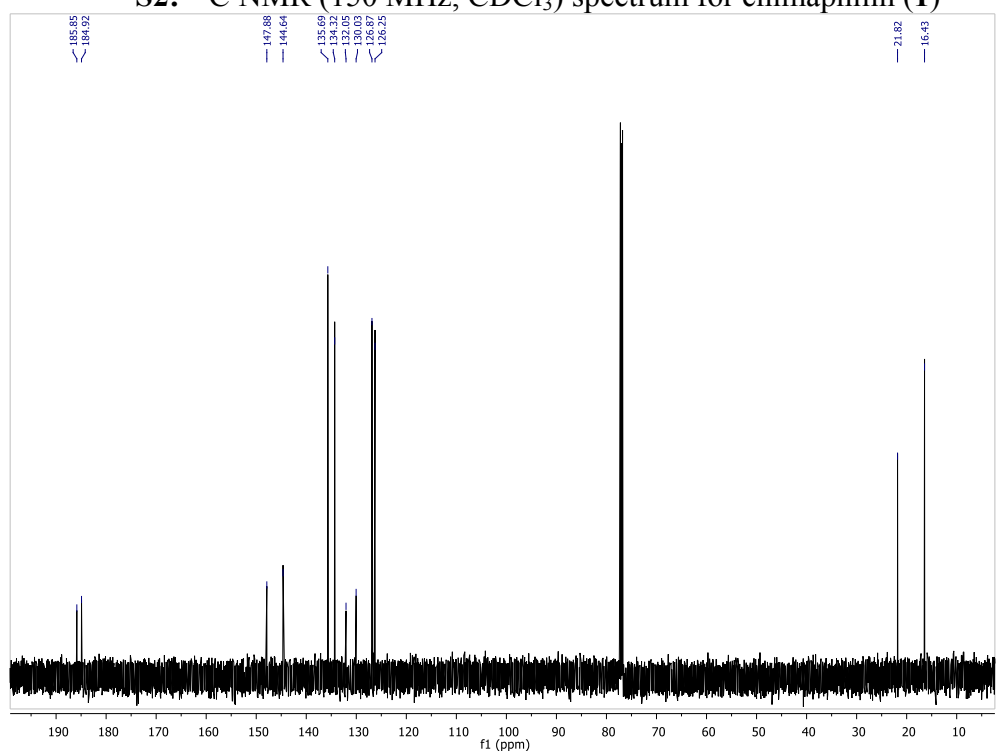





S7: gHSQC ( $^1\text{H}$  500 MHz,  $\text{CDCl}_3$ ) spectrum for 3-chloro-chimaphilin (**3**)

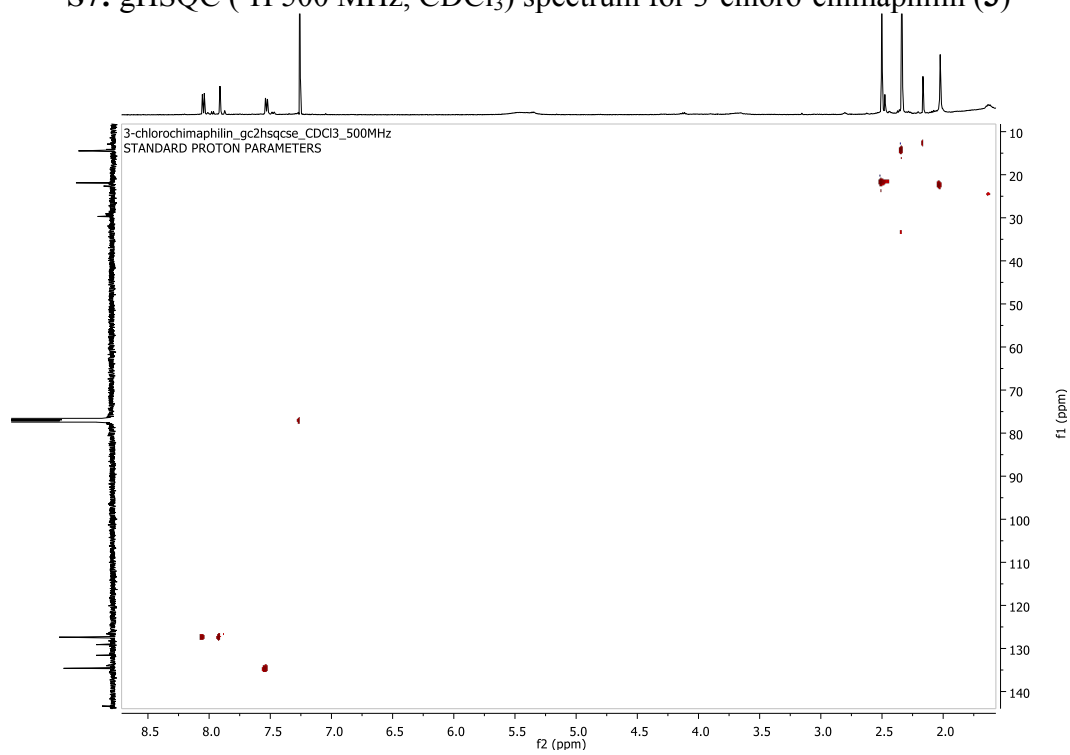

S8: gCOSY ( $^1\text{H}$  600 MHz,  $\text{CDCl}_3$ ) spectrum for 3-chloro-chimaphilin (**3**)

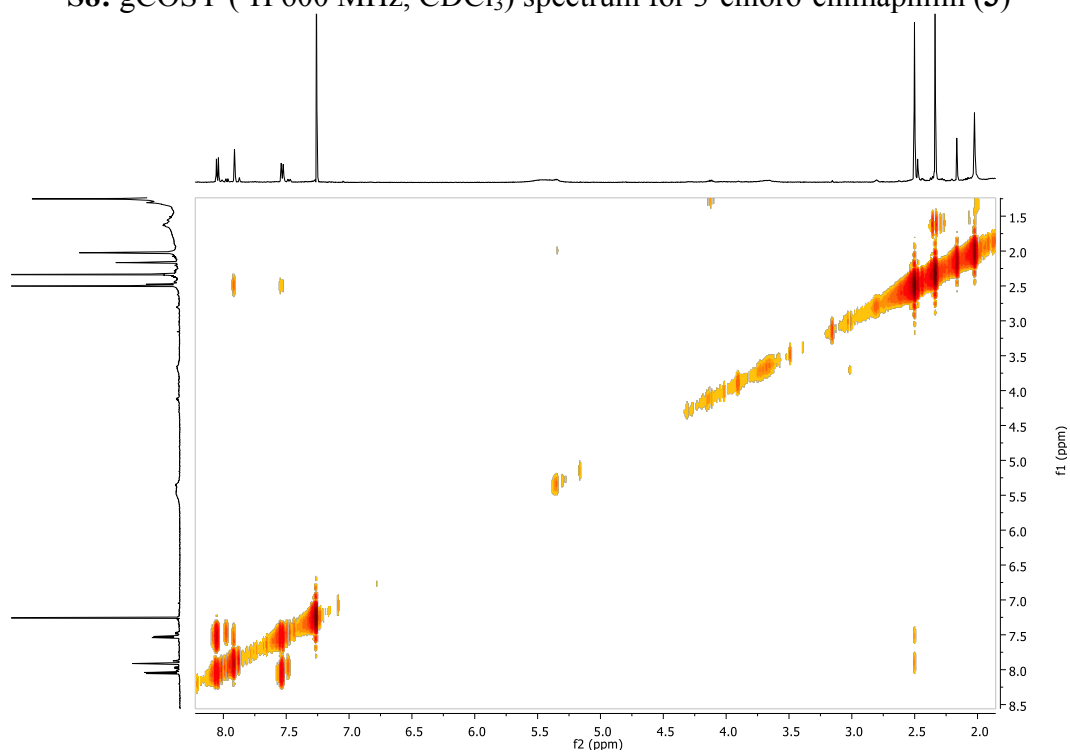

**S9:** gHMBCAD ( $^1\text{H}$  500 MHz,  $\text{CDCl}_3$ ) spectrum for 3-chloro-chimaphilin (**3**)

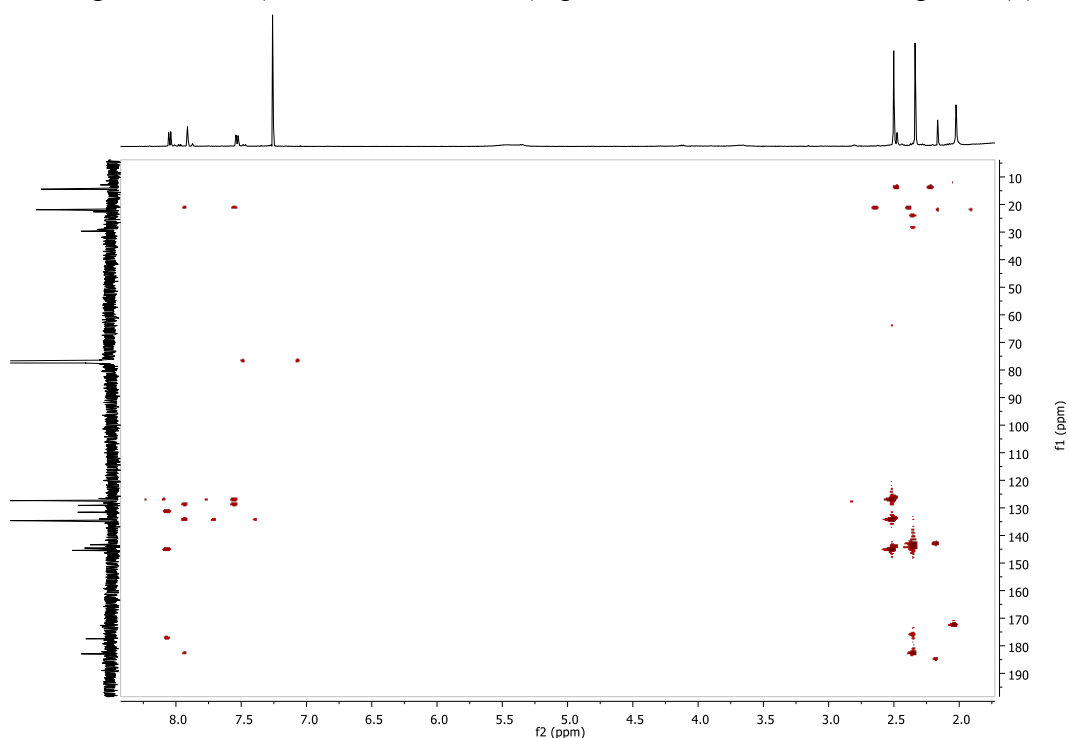

**S1:**  $^1\text{H}$  and  $^{13}\text{C}$  NMR data table for 3-chloro-chimaphilin (**3**) in  $\text{CDCl}_3$

| position | $\delta_{\text{C}}^{\text{b}}$ | $\delta_{\text{H}}$ ( $J$ in Hz) <sup>a</sup> | HMBC <sup>a</sup> | COSY <sup>c</sup> |
|----------|--------------------------------|-----------------------------------------------|-------------------|-------------------|
| 1        | 182.9                          |                                               |                   |                   |
| 2        | 143.4 <sup>d</sup>             |                                               |                   |                   |
| 3        | 144.6 <sup>d</sup>             |                                               |                   |                   |
| 4        | 177.4                          |                                               |                   |                   |
| 5        | 131.6                          |                                               |                   |                   |
| 6        | 127.4                          | 8.05 (d; 7.8)                                 | 4, 5, 10          | 7                 |
| 7        | 134.6                          | 7.53 (d; 7.8)                                 | 6, 8, 8-Me        | 6, 8-Me, 9        |
| 8        | 129.1                          |                                               |                   |                   |
| 9        | 127.4                          | 7.91 (s)                                      | 1, 7, 8, 8-Me     | 7, 8-Me           |
| 10       | 145.4                          |                                               |                   |                   |
| 2-Me     | 14.5                           | 2.34 (s)                                      | 1, 2, 3, 4        |                   |
| 8-Me     | 21.9                           | 2.50 (s)                                      | 7, 9, 10          | 7, 9              |

<sup>a</sup>500 MHz for  $^1\text{H}$  NMR, gHMBCAD, <sup>b</sup>125 MHz for  $^{13}\text{C}$  NMR, <sup>c</sup>600 MHz for gCOSY

<sup>d</sup>Ambiguous assignment

**S2:**  $^1\text{H}$  and  $^{13}\text{C}$  NMR assignments for chimaphilin (**1**), 3-chloro-chimaphilin (**2**), and 3-hydroxy-chimaphilin (**3**) in  $\text{CDCl}_3$

| Cmpd<br>Position | Chimaphilin                    |                                | 3-chlorochimaphilin            |                                | 3-hydroxychimaphilin           |                                |
|------------------|--------------------------------|--------------------------------|--------------------------------|--------------------------------|--------------------------------|--------------------------------|
|                  | $\delta_{\text{C}}^{\text{c}}$ | $\delta_{\text{H}}^{\text{a}}$ | $\delta_{\text{C}}^{\text{d}}$ | $\delta_{\text{H}}^{\text{b}}$ | $\delta_{\text{C}}^{\text{c}}$ | $\delta_{\text{H}}^{\text{a}}$ |
| 1                | 184.5                          |                                | 182.9                          |                                | 185.5                          |                                |
| 2                | 148.2                          |                                | 143.4 <sup>d</sup>             |                                | 145.2                          |                                |
| 3                | 144.6                          | 6.69 (s)                       | 144.6 <sup>d</sup>             |                                | 153.5                          |                                |
| 4                | 185.9                          |                                | 177.4                          |                                | 181.5                          |                                |
| 5                | 126.2                          |                                | 131.6                          |                                | 126.3                          |                                |
| 6                | 135.7                          | 7.82 (d; 7.8)                  | 127.4                          | 8.05 (d; 7.8)                  | 132.8                          | 7.97 (d; 7.7)                  |
| 7                | 134.3                          | 7.42 (d; 7.8)                  | 134.6                          | 7.53 (d; 7.8)                  | 133.4                          | 7.46 (d; 7.7)                  |
| 8                | 126.8                          |                                | 129.1                          |                                | 127.2                          |                                |
| 9                | 132.0                          | 7.77 (s)                       | 127.4                          | 7.91 (s)                       | 127.0                          | 7.91 (s)                       |
| 10               | 131.1                          |                                | 145.4                          |                                | 120.0                          |                                |
| 2-Me             | 16.4                           | 2.06 (s)                       | 14.5                           | 2.34 (s)                       | 8.64                           | 2.09 (s)                       |
| 8-Me             | 21.8                           | 2.38 (s)                       | 21.9                           | 2.50 (s)                       | 22.06                          | 2.49 (s)                       |

<sup>a</sup>600 MHz, <sup>b</sup>150 MHz, <sup>c</sup>125 MHz

<sup>d</sup>Ambiguous assignment

**S10:** HRESIMS spectrum for chimaphilin (**1**)

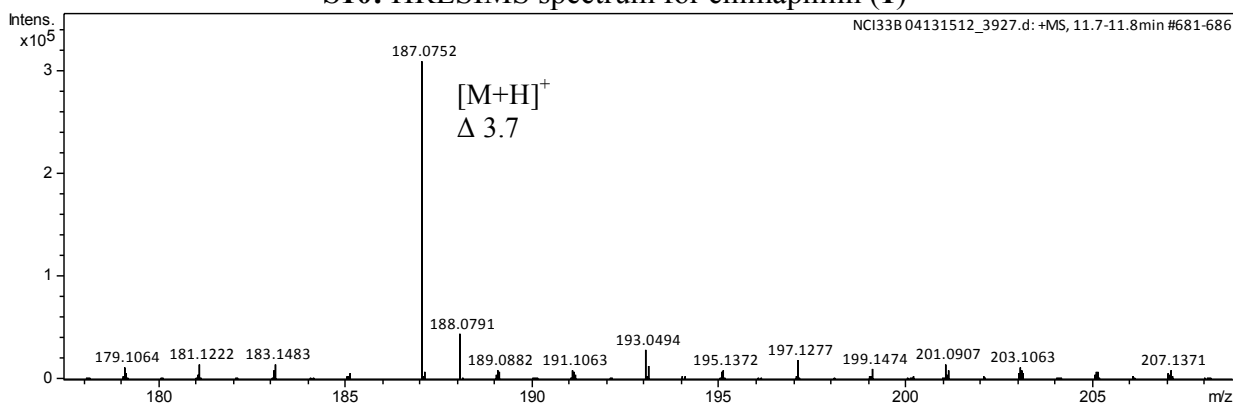

**S11:** HRESIMS spectrum for 3-hydroxy-chimaphilin (**2**)

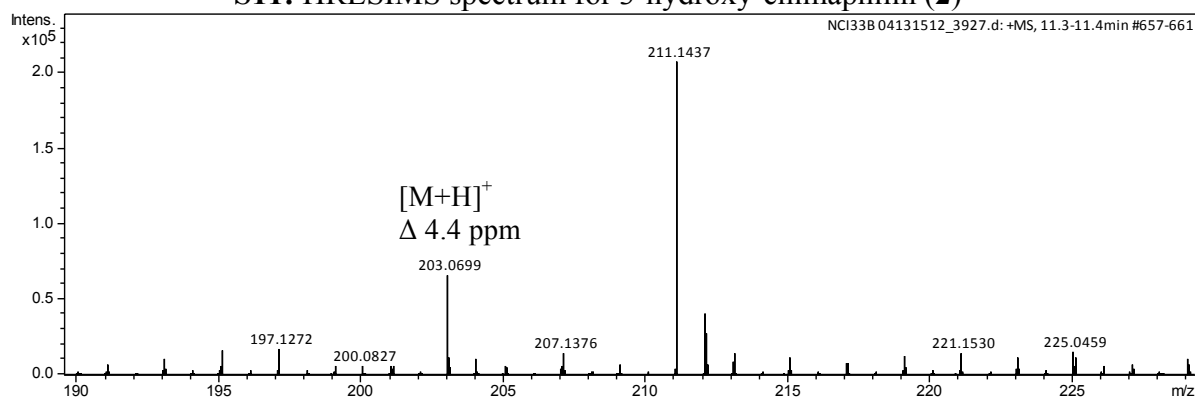

### S12: HRESIMS spectrum for 3-chloro-chimaphilin (3)

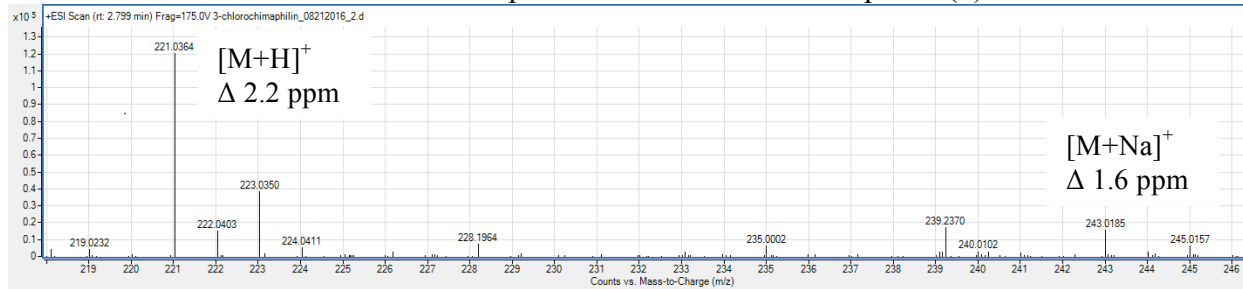

Supplement: pone.0162686.s001.pdf [file pone.0162686.s001.pdf]
