# Supplementary material for: Natural Product Screening Reveals Naphthoquinone Complex I Bypass Factors
Source: PubMed Central journal article supplement (PMC5021346; doi:10.1371/journal.pone.0162686), 2016-09-13

## S2 Appendix

### Analytical Data for the Lapachone Family of Metabolites

#### NMR Spectroscopic Data:

- Figure S1**  $^1\text{H}$  NMR (600 MHz,  $\text{CDCl}_3$ ) spectrum of lapachol (**4**)  
**Figure S2**  $^{13}\text{C}$  NMR (150 MHz,  $\text{CDCl}_3$ ) spectrum of lapachol (**4**)  
**Figure S3**  $^1\text{H}$  NMR (600 MHz,  $\text{CDCl}_3$ ) spectrum of dehydro- $\alpha$ -lapachone (**5**)  
**Figure S4**  $^{13}\text{C}$  NMR (150 MHz,  $\text{CDCl}_3$ ) spectrum of dehydro- $\alpha$ -lapachone (**5**)  
**Figure S5**  $^1\text{H}$  NMR (600 MHz,  $\text{CDCl}_3$ ) spectrum of  $\alpha$ -lapachone (**6**)  
**Figure S6**  $^{13}\text{C}$  NMR (125 MHz,  $\text{CDCl}_3$ ) spectrum of  $\alpha$ -lapachone (**6**)  
**Figure S7**  $^1\text{H}$  NMR (600 MHz,  $\text{CDCl}_3$ ) spectrum of dehydroiso- $\alpha$ -lapachone (**7**)  
**Figure S8**  $^{13}\text{C}$  NMR (125 MHz,  $\text{CDCl}_3$ ) spectrum of dehydroiso- $\alpha$ -lapachone (**7**)  
**Figure S9** gHSQC ( $^1\text{H}$  500 MHz,  $\text{CDCl}_3$ ) spectrum for dehydroiso- $\alpha$ -lapachone (**7**)  
**Figure S10** gCOSY ( $^1\text{H}$  500 MHz,  $\text{CDCl}_3$ ) spectrum for dehydroiso- $\alpha$ -lapachone (**7**)  
**Figure S11** gHMBC ( $^1\text{H}$  500 MHz,  $\text{CDCl}_3$ ) spectrum for dehydroiso- $\alpha$ -lapachone (**7**)  
**Table S1**  $^1\text{H}$  and  $^{13}\text{C}$  NMR data table for dehydroiso- $\alpha$ -lapachone (**7**) in  $\text{CDCl}_3$

#### HPLC Chromatograms:

- Figure S12** Chiral HPLC of dehydroiso- $\alpha$ -lapachone (**7**)

#### HRESIMS Data:

- Figure S13** HRESIMS spectrum for lapachol (**4**)  
**Figure S14** HRESIMS spectrum for dehydro- $\alpha$ -lapachone (**5**)  
**Figure S15** HRESIMS spectrum for  $\alpha$ -lapachone (**6**)  
**Figure S16** HRESIMS spectrum for dehydroiso- $\alpha$ -lapachone (**7**)

S1:  $^1\text{H}$  (600 MHz,  $\text{CDCl}_3$ ) spectrum for lapachol (4)

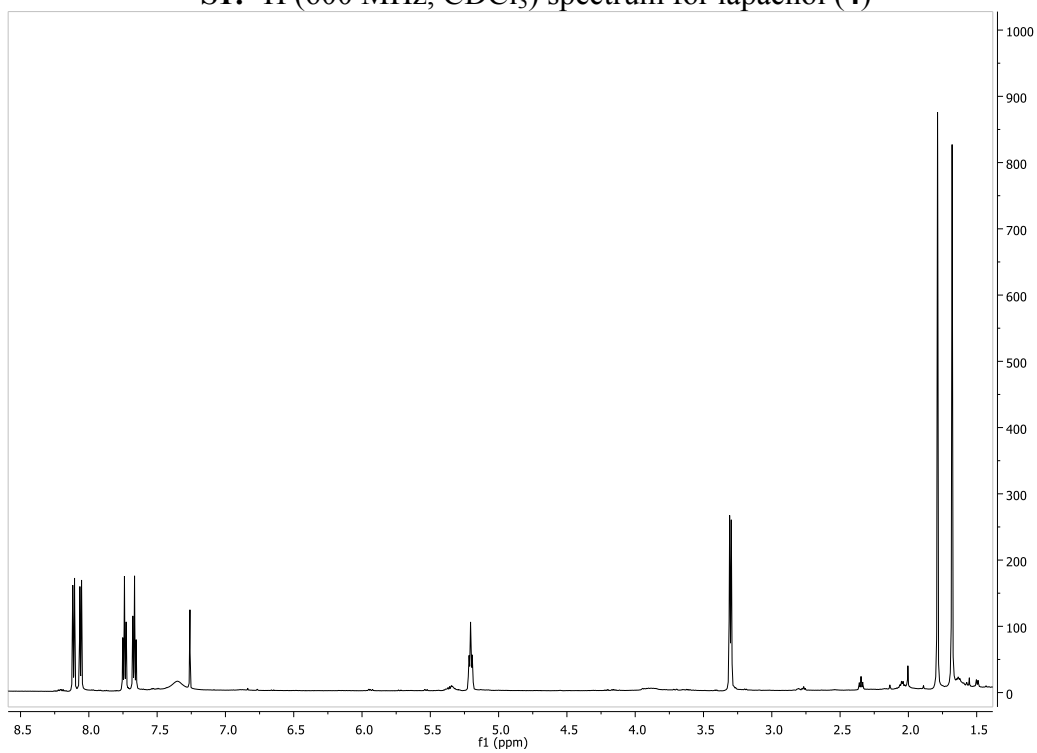

S2:  $^{13}\text{C}$  (150 MHz,  $\text{CDCl}_3$ ) spectrum for lapachol (4)

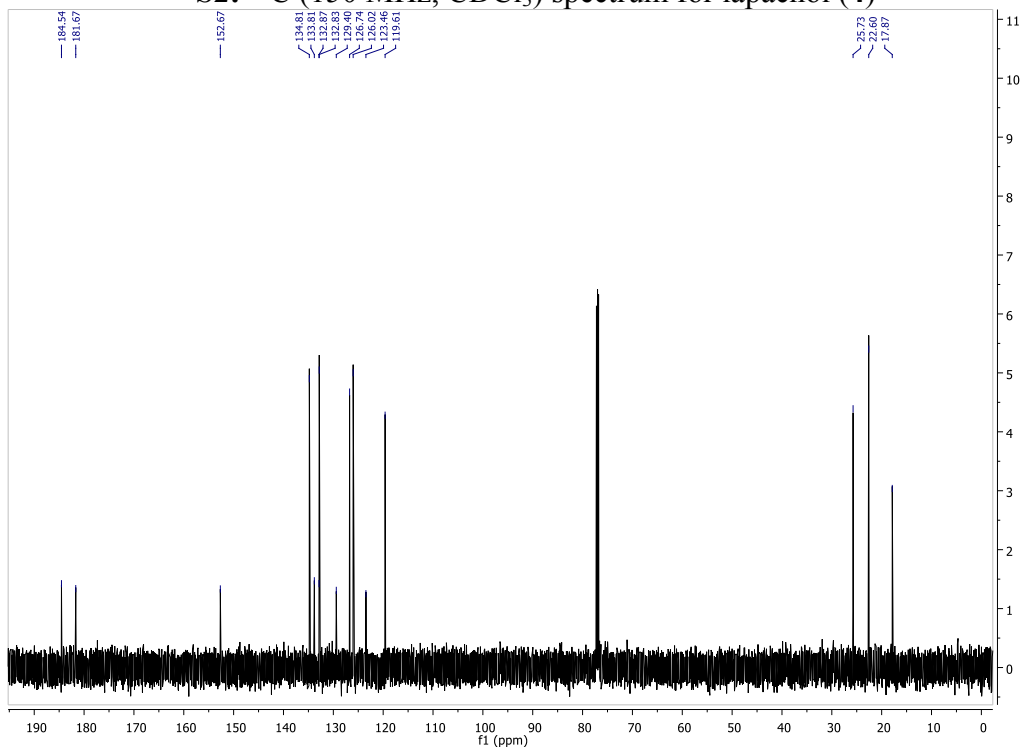

S3:  $^1\text{H}$  (600 MHz,  $\text{CDCl}_3$ ) spectrum for dehydro- $\alpha$ -lapachone (5)

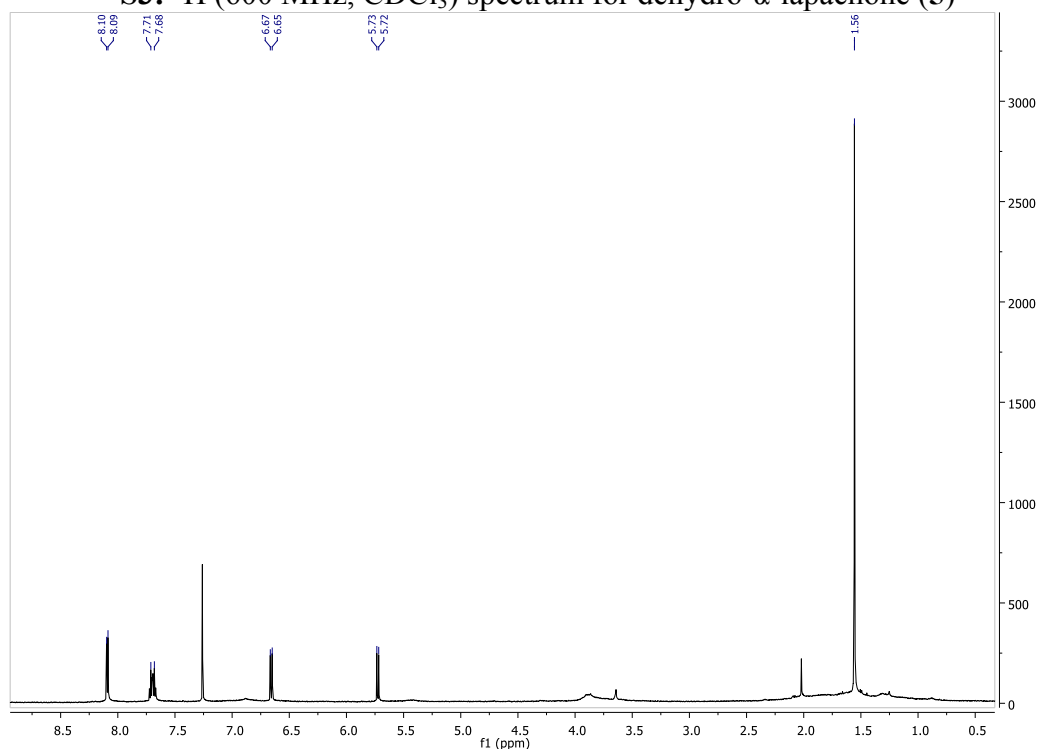

S4:  $^{13}\text{C}$  (150 MHz,  $\text{CDCl}_3$ ) spectrum for dehydro- $\alpha$ -lapachone (5)

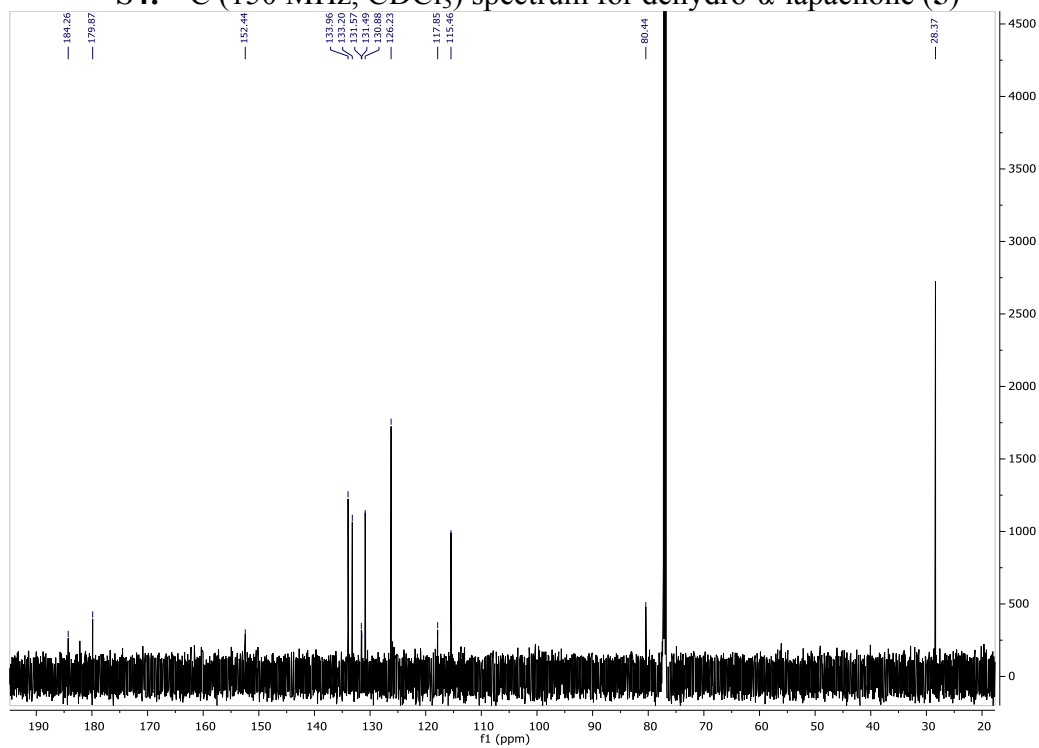

S5:  $^1\text{H}$  (600 MHz,  $\text{CDCl}_3$ ) spectrum for  $\alpha$ -lapachone (6)

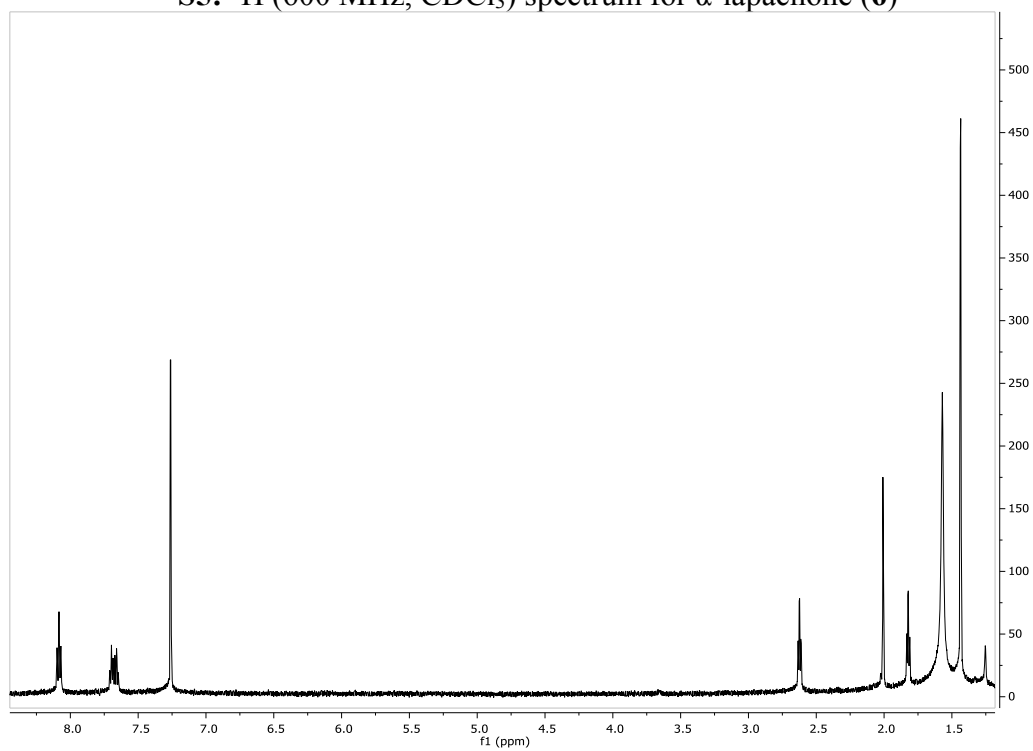

S6:  $^{13}\text{C}$  (150 MHz,  $\text{CDCl}_3$ ) spectrum for  $\alpha$ -lapachone (6)

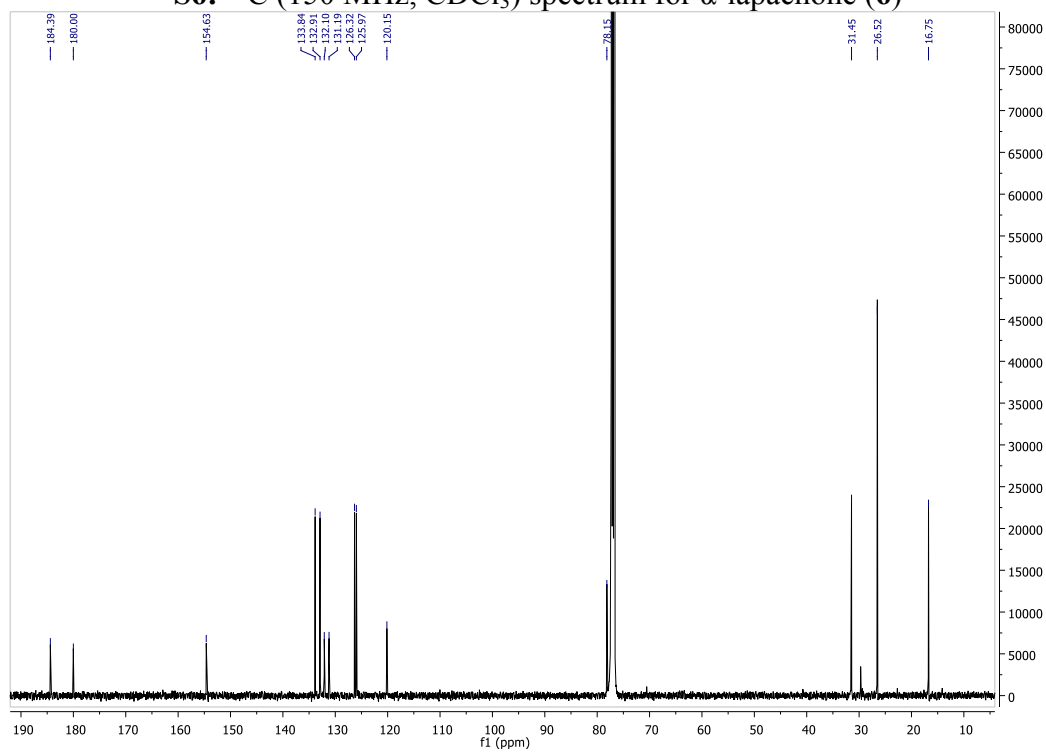

S7:  $^1\text{H}$  (600 MHz,  $\text{CDCl}_3$ ) spectrum for dehydroiso- $\alpha$ -lapachone (7)

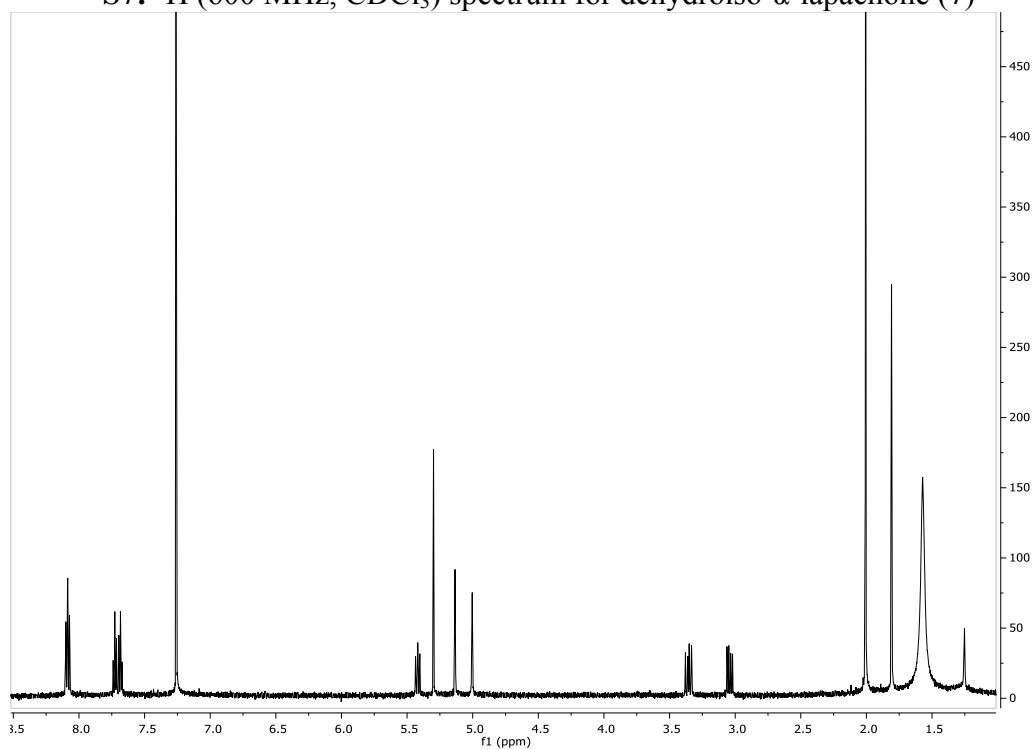

S8:  $^{13}\text{C}$  (125 MHz,  $\text{CDCl}_3$ ) spectrum for dehydroiso- $\alpha$ -lapachone (7)

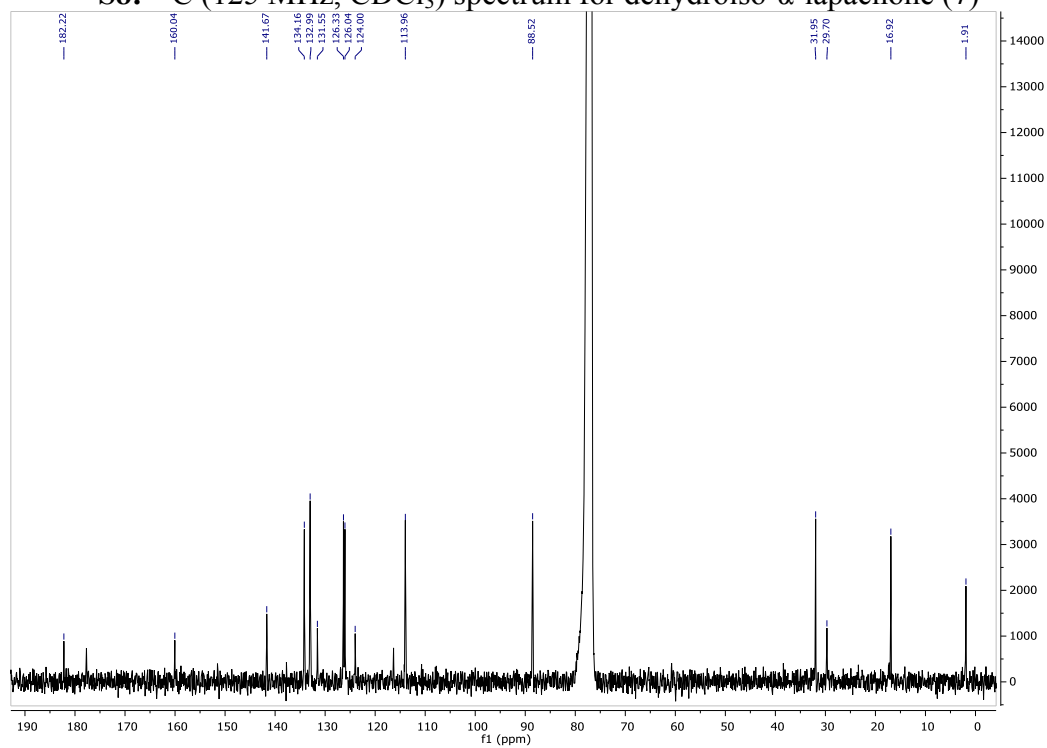

**S9:** gHSQC ( $^1\text{H}$  500 MHz,  $\text{CDCl}_3$ ) spectrum for dehydroiso- $\alpha$ -lapachone (7)

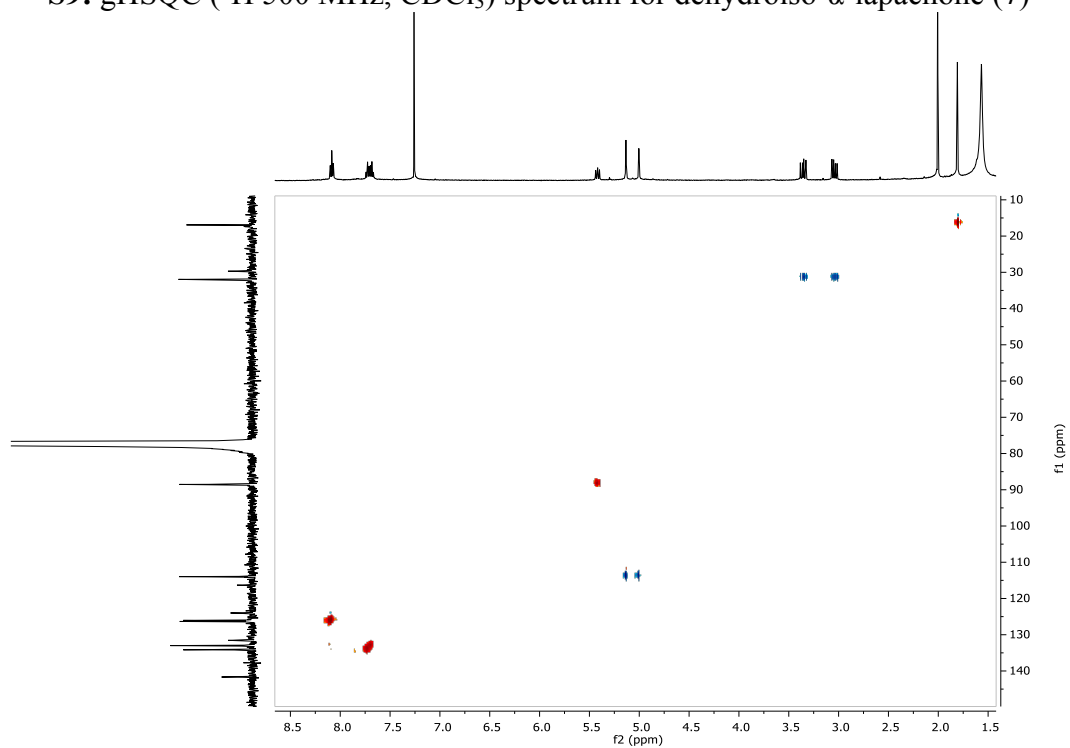

**S10:** gCOSY ( $^1\text{H}$  500 MHz,  $\text{CDCl}_3$ ) spectrum for dehydroiso- $\alpha$ -lapachone (7)

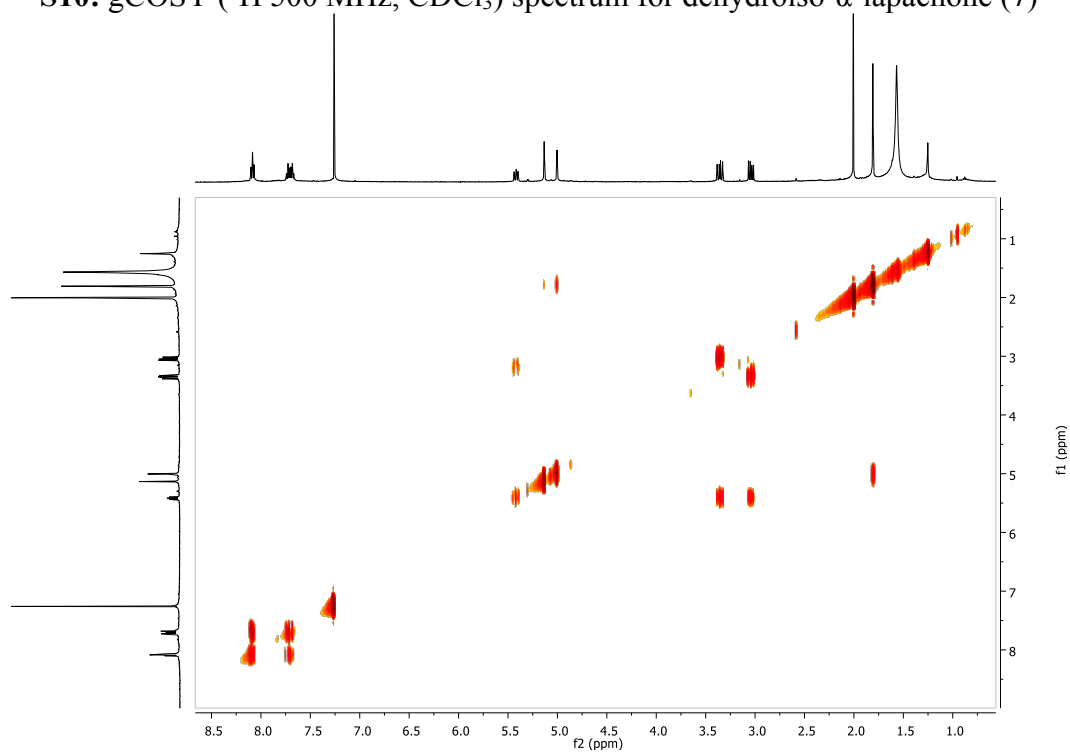

S11: gHMBCAD ( $^1\text{H}$  500 MHz,  $\text{CDCl}_3$ ) spectrum for dehydroiso- $\alpha$ -lapachone (7)

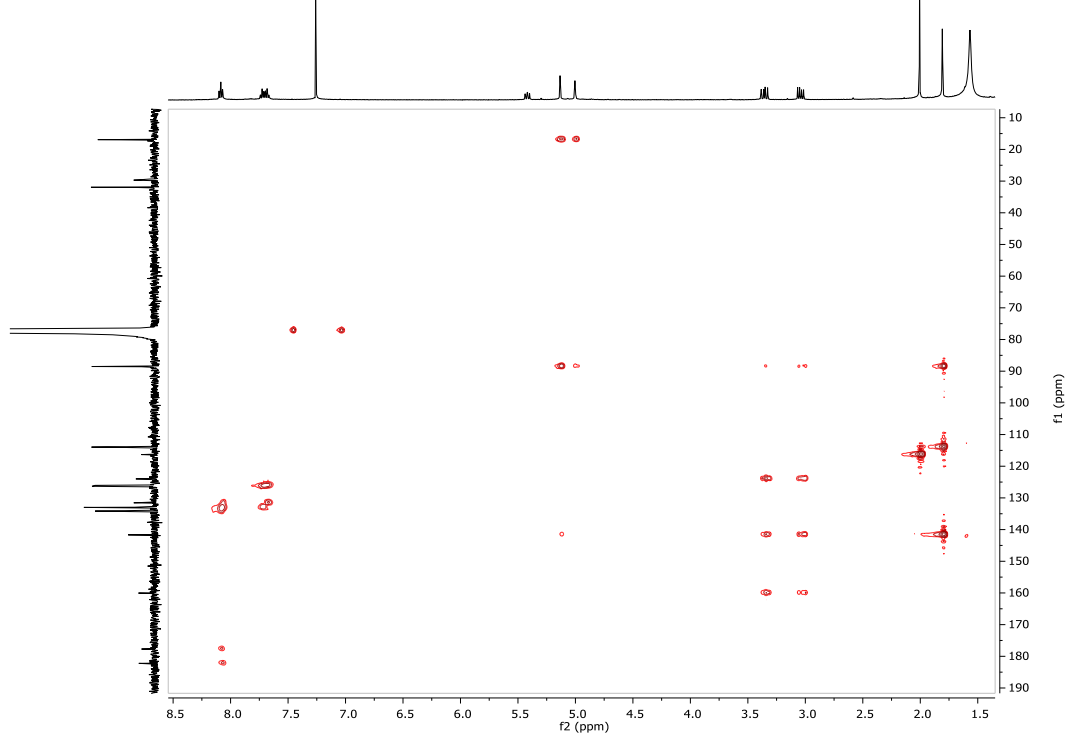

S1:  $^1\text{H}$  and  $^{13}\text{C}$  NMR data table for dehydroiso- $\alpha$ -lapachone (7) in  $\text{CDCl}_3$

| position | $\delta_{\text{C}}^{\text{b}}$ | $\delta_{\text{H}}$ (J in Hz) <sup>a</sup> | HMBC <sup>a</sup> | COSY <sup>a</sup> |
|----------|--------------------------------|--------------------------------------------|-------------------|-------------------|
| 1a       | 113.9                          | 5.13 (s)                                   | 2, 3, 15          | 15                |
| 1b       |                                | 5.00 (s)                                   | 3, 15             | 15                |
| 2        | 141.6                          |                                            |                   |                   |
| 3        | 88.5                           | 5.42 (dd; 10.8, 9.0)                       | 1                 | 4a, 4b            |
| 4a       | 32.0                           | 3.35 (dd; 17.2, 10.8)                      | 2, 5, 6           | 3, 4b             |
| 4b       |                                | 3.03 (dd; 17.2, 9.0)                       | 2, 3, 5, 6        | 3, 4a             |
| 5        | 124.0                          |                                            |                   |                   |
| 6        | 160.0                          |                                            |                   |                   |
| 7        | 177.7                          |                                            |                   |                   |
| 8        | 131.6                          |                                            |                   |                   |
| 9        | 126.0                          | 8.09 (t; 7.5)                              | 7, 8, 10          | 10, 11            |
| 10       | 133.0                          | 7.72 (t; 7.5)                              | 9, 11             | 9/12              |
| 11       | 134.2                          | 7.68 (t; 7.5)                              | 12, 10            | 9/12              |
| 12       | 126.3                          | 8.09 (t; 7.5)                              | 11, 13, 14        | 10, 11            |
| 13       | 131.6                          |                                            |                   |                   |
| 14       | 182.2                          |                                            |                   |                   |
| 15       | 16.9                           | 1.80 (s)                                   | 1, 2, 3           | 1a, 1b            |

<sup>a</sup>500 MHz for  $^1\text{H}$  NMR, gHMBCAD, gCOSY, <sup>b</sup>125 MHz for  $^{13}\text{C}$  NMR

### S12: Chiral HPLC of dehydroiso- $\alpha$ -lapachone (7)

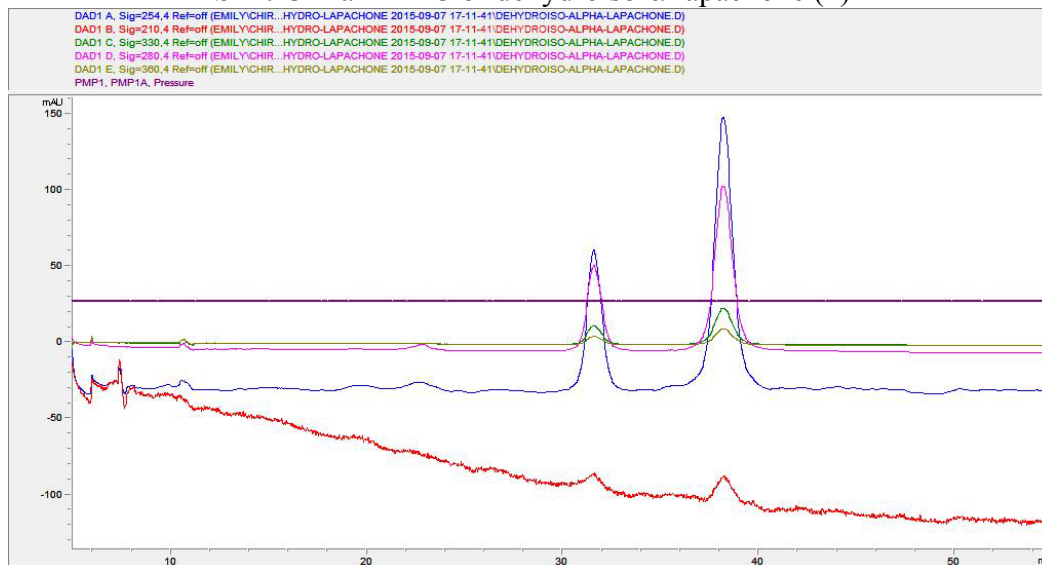

**Figure S12:** Dehydroiso-  $\alpha$ -lapachone (7) is a mixture of enantiomers.

**HPLC Method:** Isocratic gradient using 1% ethanol + 0.1% DEA/hexane + 0.1% DEA with a flow rate of 0.7 mL/min on a Phenomenex Cellulose-4 analytical column (4.6 x 250 mm).

### S13: HRESIMS spectrum for lapachol (4)

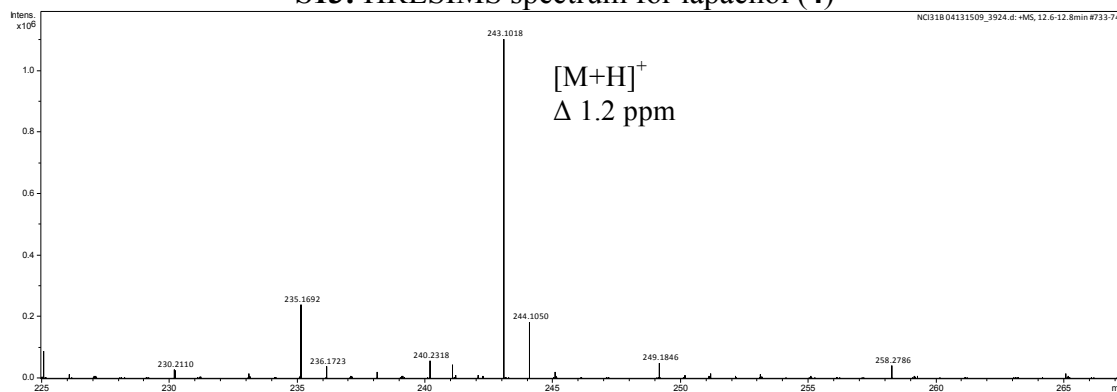

### S14: HRESIMS spectrum for dehydro- $\alpha$ -lapachone (5)

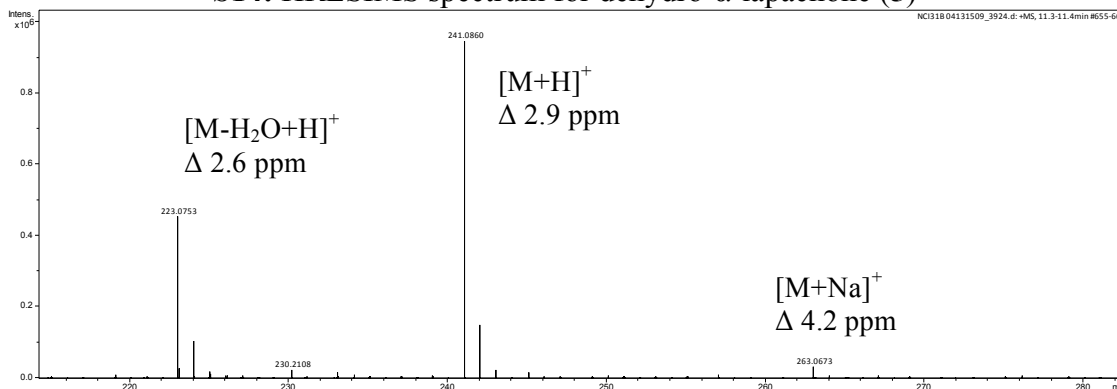



**S15: HRESIMS spectrum for  $\alpha$ -lapachone (6)**

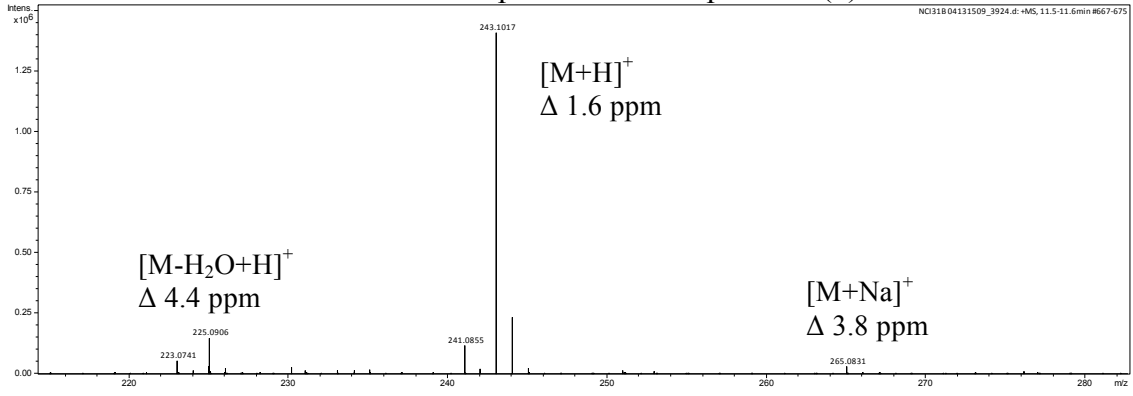

**S16: HRESIMS spectrum for dehydroiso- $\alpha$ -lapachone (7)**

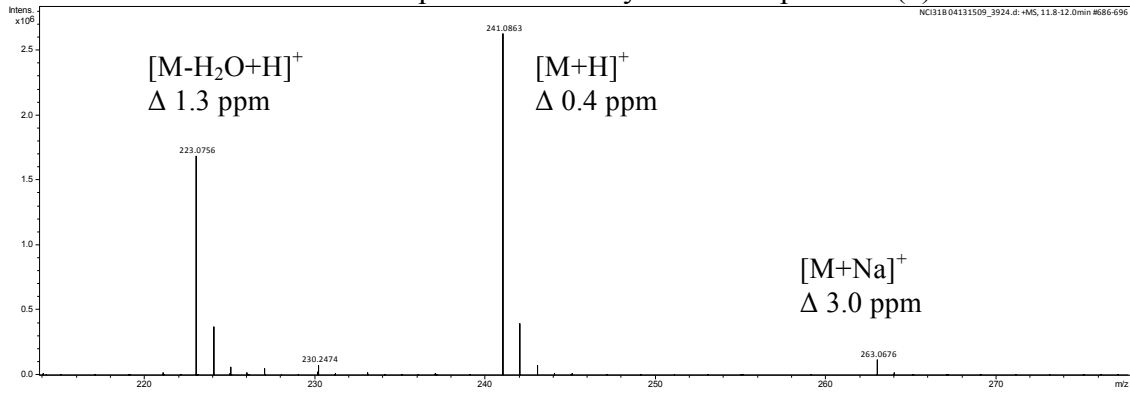

Supplement: pone.0162686.s002.pdf [file pone.0162686.s002.pdf]
