# Supplementary material for: Natural Product Screening Reveals Naphthoquinone Complex I Bypass Factors
Source: PLoS One. 2016 Sep 13;11(9):e0162686. doi: 10.1371/journal.pone.0162686 (PMC5021346; doi:10.1371/journal.pone.0162686)
Supplement: S2 Table — The data from the original testing day (“Trial 1”) is included for reference alongside the data from retesting (“Trial 2”). (XLSX) [file pone.0162686.s006.xlsx]

## Sheet: Sheet1
		Trial 1				Trial 2
96 well ID	Type	Date	Replicate 1	Replicate 2	Average	Date	Replicate 1	Replicate 2	Average	Rep 1 +ant	Rep 2 +ant	Avg + ant	Requested for followup	Received for followup	Internal ID	NPID	Family	Genus	Species	Reproduced?	Seahorse result	Active metabolite (HRLCMS confirmed)	Result of followup
11100804_G05	Extract	2014-11-19	10.9673	11.2388	11.1031	2014-11-20	9.04161	9.48248	12.4673	12.4673	10.2125	11.3399	yes	yes	Extract 1	N133415	Passifloraceae	Paropsia	grandiflora	no	No effect	n/a	n/a
11100206_C04	Extract	2014-11-19	6.67617	8.89697	7.78657	2014-11-21	8.15822	6.75456	7.41421	7.41421	5.71336	6.56378	yes	yes	Extract 2	N131485	Rubiaceae	Mussaenda	chevalieri aff.	yes	No effect	n/a	n/a
11010341_D02	Extract	2014-11-25	8.02817	5.30172	6.66494	2014-12-05	2.51173	2.06608	2.88734	2.88734	2.10204	2.49469	yes	no	n/a	n/a	n/a	n/a	n/a	n/a	n/a	n/a	n/a
11100102_E12	Extract	2014-11-19	5.13343	5.80453	5.46898	2014-11-21	4.96058	4.91562	4.87784	4.87784	5.54215	5.20999	yes	yes	Extract 3	N131117	?Not specified	?Not specified	?Not specified	no	No effect	n/a	n/a
11010353_F10	Extract	2014-11-25	7.71323	3.17139	5.44231	2014-12-05	3.16634	2.01267	2.4965	2.4965	4.17326	3.33488	yes	no	n/a	n/a	n/a	n/a	n/a	n/a	n/a	n/a	n/a
11100206_A09	Extract	2014-11-19	4.24244	4.84344	4.54294	2014-11-21	5.28319	5.04351	3.76131	3.76131	5.27025	4.51578	yes	yes	Extract 4	N131561	Rubiaceae	Prismatomeris	tetrandra	yes	No effect	n/a	n/a
11010341_D12	Extract	2014-11-25	2.62854	5.60721	4.11788	2014-12-05	1.80344	1.6444	2.01833	2.01833	1.65226	1.8353	yes	no	n/a	n/a	n/a	n/a	n/a	n/a	n/a	n/a	n/a
11100302_B02	Extract	2014-11-19	3.44149	4.00373	3.72261	2014-11-21	4.16616	3.16554	2.78008	2.78008	2.48313	2.6316	yes	yes	Extract 5	N131627	Rubiaceae	Mussaenda	sp.	yes	No effect	n/a	n/a
11100102_C10	Extract	2014-11-19	3.56411	3.77763	3.67087	2014-11-21	2.82341	3.09821	2.13274	2.13274	2.87927	2.50601	yes	yes	Extract 6	N131081	?Not specified	?Not specified	?Not specified	no	No effect	n/a	n/a
11100304_B06	Extract	2014-11-19	3.72113	3.33072	3.52593	2014-12-04	1.73004	2.42452	2.02452	2.02452	1.86583	1.94518	yes	yes	Extract 7	N131127	?Not specified	?Not specified	?Not specified	yes	No effect	n/a	n/a
11100304_A06	Extract	2014-11-19	3.77958	3.10195	3.44076	2014-12-04	2.11737	2.58746	1.92163	1.92163	1.68962	1.80563	yes	yes	Extract 8	N131125	?Not specified	?Not specified	?Not specified	yes	No effect	n/a	n/a
11100903_G05	Extract	2014-11-19	3.04352	3.57856	3.31104	2014-12-04	1.82484	1.93544	1.48078	1.48078	1.38822	1.4345	yes	yes	Extract 9	N133063	Icacinaceae	Rhaphiostylis	madagascariensis	yes	No effect	n/a	n/a
11100302_C09	Extract	2014-11-19	3.20663	3.40347	3.30505	2014-11-21	3.01819	3.10601	2.66828	2.66828	2.47722	2.57275	yes	yes	Extract 10	N131741	Rubiaceae	Lasianthus	saprosmoides	yes	No effect	n/a	n/a
11010341_F06	Extract	2014-11-25	3.07108	3.32279	3.19694	2014-12-05	1.6194	1.13698	1.47439	1.47439	1.61235	1.54337	yes	no	n/a	n/a	n/a	n/a	n/a	n/a	n/a	n/a	n/a
11010353_D12	Extract	2014-11-25	4.37421	1.96318	3.16869	2014-12-05	2.11565	1.05411	1.5598	1.5598	2.40094	1.98037	yes	no	n/a	n/a	n/a	n/a	n/a	n/a	n/a	n/a	n/a
11010341_B06	Extract	2014-11-25	3.00245	3.31266	3.15756	2014-12-05	1.91404	2.62013	2.34468	2.34468	1.58835	1.96651	yes	no	n/a	n/a	n/a	n/a	n/a	n/a	n/a	n/a	n/a
11100807_D07	Extract	2014-11-19	3.14154	3.06423	3.10288	2014-12-04	1.63739	1.54345	1.42665	1.42665	1.16511	1.29588	yes	yes	Extract 11	N133265	Flacourtiaceae	Casearia	tulasneana	no	No effect	n/a	n/a
11020709_C02	Extract	2014-11-24	3.25939	2.85956	3.05947	2014-12-05	1.28811	1.1766	1.12004	1.12004	1.07002	1.09503	yes	yes	Extract 202	F232259	?Not specified	Actinomycete	?raw_material: 0G0S5768-C	yes	Inc OCR	None identified	Did not follow up.
11100807_E04	Extract	2014-11-19	2.85882	3.16738	3.0131	2014-12-04	2.06634	2.24867	1.36566	1.36566	1.49973	1.4327	yes	yes	Extract 12	N133219	Icacinaceae	Rhaphiostylis	madagascariensis	yes	No effect	n/a	n/a
11100302_E03	Extract	2014-11-19	2.74221	3.18147	2.96184	2014-11-21	3.00102	2.76667	2.07306	2.07306	2.24984	2.16145	yes	yes	Extract 13	N131649	Rubiaceae	Psychotria	sp.	yes	No effect	n/a	n/a
11100302_D09	Extract	2014-11-19	2.43588	3.45419	2.94503	2014-11-21	2.38065	2.70441	2.63995	2.63995	2.55927	2.59961	yes	yes	Extract 102	N131743	Rubiaceae	Craterispermum	sp.	yes	No effect	n/a	n/a
11100304_E10	Extract	2014-11-19	2.76626	2.56837	2.66731	2014-12-04	1.40392	2.04794	1.40378	1.40378	1.32282	1.3633	yes	yes	Extract 14	N131197	?Not specified	?Not specified	?Not specified	yes	No effect	n/a	n/a
11010353_A10	Extract	2014-11-25	3.18926	2.10168	2.64547	2014-12-05	1.56819	1.30059	1.41055	1.41055	2.00072	1.70564	yes	no	n/a	n/a	n/a	n/a	n/a	n/a	n/a	n/a	n/a
11100302_G09	Extract	2014-11-19	2.41558	2.8478	2.63169	2014-11-21	2.82341	2.29895	1.98332	1.98332	2.2765	2.12991	yes	yes	Extract 15	N131749	Rubiaceae	Paracephaelis	cinerea	yes	No effect	n/a	n/a
11090204_H04	Extract	2014-11-19	2.56421	2.65145	2.60783	2014-12-04	1.56747	2.31738	1.9094	1.9094	1.84983	1.87961	yes	yes	Extract 17	N129323	Orchidaceae	Platanthera	dilatata	yes	No effect	n/a	n/a
11100205_H04	Extract	2014-11-19	2.22834	2.87594	2.55214	2014-11-21	2.36055	2.36326	2.08204	2.08204	2.31045	2.19624	yes	yes	Extract 18	N131319	Rubiaceae	Lasianthus	hirsutus	yes	No effect	n/a	n/a
11100205_B07	Extract	2014-11-19	2.71585	2.36601	2.54093	2014-11-21	2.11524	2.83964	1.98859	1.98859	2.57106	2.27983	yes	yes	Extract 103	N131355	Rubiaceae	Ixora	laotica	yes	No effect	n/a	n/a
11100304_B12	Extract	2014-11-19	2.47391	2.60604	2.53998	2014-12-04	1.37549	1.4283	1.41677	1.41677	1.5587	1.48773	yes	yes	Extract 20	N131223	Rubiaceae	Paracephaelis	cinerea	yes	No effect	n/a	n/a
11100807_G07	Extract	2014-11-19	2.35724	2.67762	2.51743	2014-12-04	1.36424	1.62123	1.38875	1.38875	1.33312	1.36093	yes	yes	Extract 21	N133271	Melastomataceae	Memecylon	cotonifolioides	yes	No effect	n/a	n/a
11010341_C12	Extract	2014-11-25	1.84664	3.13168	2.48916	2014-12-05	1.4116	1.68119	1.64237	1.64237	1.42236	1.53237	yes	no	n/a	n/a	n/a	n/a	n/a	n/a	n/a	n/a	n/a
11100304_G08	Extract	2014-11-19	2.54167	2.4025	2.47208	2014-12-04	1.23644	1.90892	1.41677	1.41677	1.33934	1.37805	yes	yes	Extract 23	N131169	?Not specified	?Not specified	?Not specified	yes	No effect	n/a	n/a
11100302_H02	Extract	2014-11-19	2.64168	2.18841	2.41504	2014-11-21	3.11541	3.21795	3.12013	3.12013	3.39328	3.25671	yes	yes	Extract 104	N131639	Rubiaceae	Lasianthus	cyanocarpus	no	n/a	n/a	n/a
11100702_D10	Extract	2014-11-19	2.32713	2.38457	2.35585	2014-11-20	1.92227	1.62201	2.277	2.277	1.44656	1.86178	yes	yes	Extract 105	N132817	?Not specified	?Not specified	?Not specified	yes	No effect	n/a	n/a
11010353_B05	Extract	2014-11-25	2.624	2.05872	2.34136	2014-12-05	1.51722	1.56764	1.71672	1.71672	2.04978	1.88325	yes	no	n/a	n/a	n/a	n/a	n/a	n/a	n/a	n/a	n/a
11010341_C06	Extract	2014-11-25	2.30309	2.34725	2.32517	2014-12-05	1.44852	1.616	1.73288	1.73288	1.25418	1.49353	yes	no	n/a	n/a	n/a	n/a	n/a	n/a	n/a	n/a	n/a
11100906_D04	Extract	2014-11-19	2.33385	2.27362	2.30374	2014-12-04	1.34493	1.4404	1.24664	1.24664	1.12345	1.18504	yes	yes	Extract 25	N133921	Sapotaceae	Mimusops	voalela	yes	No effect	n/a	n/a
11100805_D04	Extract	2014-11-19	1.99665	2.58052	2.28858	2014-11-20	1.81603	1.72412	1.765	1.765	1.46784	1.61642	yes	yes	Extract 106	N133569	Euphorbiaceae	Phyllanthus	aff. fusco-luridus	yes	No effect	n/a	n/a
11040209_B11	Extract	2014-11-19	2.55097	1.95369	2.25233	2014-12-05	1.54364	1.20478	1.86659	1.86659	1.23729	1.55194	yes	yes	Extract 107	N119403	Orchidaceae	Habenaria	saccata	yes	No effect	n/a	n/a
11100206_G09	Extract	2014-11-19	2.0816	2.40767	2.24464	2014-11-21	2.17527	2.16372	1.93609	1.93609	2.03844	1.98726	yes	yes	Extract 108	N131573	Rubiaceae	Prismatomeris	tetrandra	yes	No effect	n/a	n/a
11100205_E11	Extract	2014-11-19	2.01929	2.41661	2.21795	2014-11-21	2.02358	1.87241	1.81979	1.81979	1.65009	1.73494	yes	yes	Extract 109	N131425	Rubiaceae	Urophyllum	longifolium aff.	yes	No effect	n/a	n/a
11010353_E10	Extract	2014-11-25	2.70883	1.72566	2.21725	2014-12-05	1.62049	1.24776	1.51154	1.51154	1.76363	1.63759	yes	no	n/a	n/a	n/a	n/a	n/a	n/a	n/a	n/a	n/a
11090204_E10	Extract	2014-11-19	2.19932	2.19788	2.1986	2014-12-04	1.63294	1.99916	1.23462	1.23462	1.2319	1.23326	yes	yes	Extract 110	N129413	Pyrolaceae	Pyrola	asarifolia	yes	Inc OCR	Chimaphilin	Fractionated.
11100302_C12	Extract	2014-11-19	2.30967	2.07275	2.19121	2014-11-21	1.78802	2.08553	1.71225	1.71225	2.10346	1.90785	yes	yes	Extract 111	N131789	Rubiaceae	Craterispermum	sp.	no	n/a	n/a	n/a
11010353_F07	Extract	2014-11-25	2.26438	2.09835	2.18136	2014-12-05	1.45739	1.41647	1.48003	1.48003	1.81611	1.64807	yes	no	n/a	n/a	n/a	n/a	n/a	n/a	n/a	n/a	n/a
11040209_D06	Extract	2014-11-19	2.13914	2.19305	2.1661	2014-12-05	2.03925	1.30803	1.22992	1.22992	1.17594	1.20293	yes	yes	Extract 112	N119151	Pyrolaceae	Chimaphila	umbellatum	yes	Inc OCR	Chimaphilin	Not fractionated. Extract is from same organism as Extracts 26 and 33.
11090302_G05	Extract	2014-11-19	2.1145	2.1765	2.1455	2014-12-05	1.21135	1.22406	1.29651	1.29651	1.29444	1.29547	yes	yes	Extract 113	N130219	Arecaceae	Livistona	chinensis	yes	No effect	n/a	n/a
11100303_F10	Extract	2014-11-19	2.132	2.12108	2.12654	2014-12-04	1.12888	1.46897	1.24896	1.24896	1.3147	1.28183	yes	yes	Extract 114	N131903	Rubiaceae	Saldinia	axillaris	yes	No effect	n/a	n/a
11010341_F02	Extract	2014-11-25	2.11877	2.1021	2.11043	2014-12-05	1.50641	1.49663	1.26489	1.26489	1.25128	1.25808	yes	no	n/a	n/a	n/a	n/a	n/a	n/a	n/a	n/a	n/a
11100304_G10	Extract	2014-11-19	1.9913	2.1183	2.0548	2014-12-04	1.27541	1.88867	1.28988	1.28988	1.26517	1.27752	yes	yes	Extract 115	N131201	Euphorbiaceae	Anomostachys	lastellei	yes	No effect	n/a	n/a
11020709_D02	Extract	2014-11-24	2.2336	1.87297	2.05328	2014-12-05	0.942559	1.08285	0.844508	0.844508	0.837569	0.841039	yes	yes	Extract 203	F232261	?Not specified	Actinomycete	?raw_material: 0G0S5768-C	yes	Inc OCR	None identified	Did not follow up.
11100304_C07	Extract	2014-11-19	2.25527	1.84819	2.05173	2014-12-04	1.5338	1.45068	1.44832	1.44832	1.69608	1.5722	yes	yes	Extract 116	N131145	?Not specified	?Not specified	?Not specified	no	n/a	n/a	n/a
11100804_A10	Extract	2014-11-19	2.13631	1.9513	2.04381	2014-11-20	2.21239	2.51115	1.96833	1.96833	1.67162	1.81997	yes	yes	Extract 31	N133483	Bignoniaceae	Stereospermum	euphoroides cf.	yes	Inc OCR	Lapachone series	Fractionated.
11100303_G11	Extract	2014-11-19	1.97051	1.99184	1.98117	2014-12-04	1.40015	1.47475	1.52301	1.52301	1.43483	1.47892	yes	yes	Extract 118	N131921	Thelypteridaceae	Cyclosorus	gongylodes	yes	No effect	n/a	n/a
11100205_D08	Extract	2014-11-19	2.06825	1.8851	1.97667	2014-11-21	1.62689	1.7475	1.49342	1.49342	1.62493	1.55918	no	no	n/a	n/a	n/a	n/a	n/a	n/a	n/a	n/a	n/a
11010341_G10	Extract	2014-11-25	1.79958	2.11761	1.95859	2014-12-05	1.44336	1.07548	1.19277	1.19277	1.27038	1.23158	no	no	n/a	n/a	n/a	n/a	n/a	n/a	n/a	n/a	n/a
11090304_B03	Extract	2014-11-19	1.77126	2.1448	1.95803	2014-12-05	1.49222	1.30722	1.28549	1.28549	1.23248	1.25898	yes	yes	Extract 119	N130357	Rubiaceae	Palicourea	riparia	yes	No effect	n/a	n/a
11090302_E07	Extract	2014-11-19	1.98194	1.89554	1.93874	2014-12-05	1.13948	1.19715	1.01489	1.01489	0.985526	1.00021	no	no	n/a	n/a	n/a	n/a	n/a	n/a	n/a	n/a	n/a
11010341_D04	Extract	2014-11-25	1.96843	1.90536	1.9369	2014-12-05	1.35446	1.13675	1.25539	1.25539	1.15932	1.20735	no	no	n/a	n/a	n/a	n/a	n/a	n/a	n/a	n/a	n/a
11090304_C10	Extract	2014-11-19	1.90433	1.95725	1.93079	2014-12-05	1.16732	1.18105	1.19132	1.19132	1.26279	1.22706	no	no	n/a	n/a	n/a	n/a	n/a	n/a	n/a	n/a	n/a
11100807_D08	Extract	2014-11-19	1.9808	1.88047	1.93064	2014-12-04	1.25611	1.2379	1.08375	1.08375	1.04132	1.06253	no	no	n/a	n/a	n/a	n/a	n/a	n/a	n/a	n/a	n/a
11100302_A03	Extract	2014-11-19	2.22634	1.56507	1.89571	2014-11-21	2.89908	2.66707	2.02661	2.02661	2.34385	2.18523	yes	yes	Extract 34	N131641	Rubiaceae	Psychotria	sp.	no	No effect	n/a	n/a
11090501_D04	Extract	2014-11-19	1.92997	1.85418	1.89208	2014-12-05	1.25039	1.34904	1.08224	1.08224	1.2876	1.18492	no	no	n/a	n/a	n/a	n/a	n/a	n/a	n/a	n/a	n/a
11100304_C08	Extract	2014-11-19	1.91406	1.82908	1.87157	2014-12-04	1.06482	1.43335	1.14591	1.14591	1.16333	1.15462	no	no	n/a	n/a	n/a	n/a	n/a	n/a	n/a	n/a	n/a
11100205_A02	Extract	2014-11-19	1.8241	1.91668	1.87039	2014-11-21	2.26775	2.01201	1.68802	1.68802	1.95156	1.81979	yes	yes	Extract 37	N131273	Rubiaceae	Rothmannia	vietnamensis	yes	No effect	n/a	n/a
11010341_E07	Extract	2014-11-25	1.78849	1.94126	1.86487	2014-12-05	1.18595	1.27375	1.1788	1.1788	1.47909	1.32894	no	no	n/a	n/a	n/a	n/a	n/a	n/a	n/a	n/a	n/a
11100304_D07	Extract	2014-11-19	2.07725	1.65088	1.86407	2014-12-04	1.26785	1.35663	1.15917	1.15917	1.31497	1.23707	no	no	n/a	n/a	n/a	n/a	n/a	n/a	n/a	n/a	n/a
11100305_G05	Extract	2014-11-19	1.94703	1.77664	1.86184	2014-12-04	1.25629	1.57728	1.22548	1.22548	1.16219	1.19384	yes	yes	Extract 120	N132001	Rubiaceae	Ixora	littoralis	yes	No effect	n/a	n/a
11100805_C03	Extract	2014-11-19	1.94684	1.77239	1.85962	2014-11-20	1.95749	2.01852	1.86936	1.86936	1.36924	1.6193	yes	yes	Extract 38	N133551	Erythroxylaceae	Erythroxylum	leandrianum	no	No effect	n/a	n/a
11090302_D09	Extract	2014-11-19	1.80534	1.89184	1.84859	2014-12-05	1.01102	1.01612	1.12703	1.12703	1.15884	1.14293	no	no	n/a	n/a	n/a	n/a	n/a	n/a	n/a	n/a	n/a
11090302_A10	Extract	2014-11-19	1.92728	1.76413	1.84571	2014-12-05	1.33541	1.15848	1.29875	1.29875	1.31986	1.3093	no	no	n/a	n/a	n/a	n/a	n/a	n/a	n/a	n/a	n/a
11010341_F07	Extract	2014-11-25	1.76359	1.90401	1.8338	2014-12-05	1.38501	1.09104	1.33703	1.33703	1.32382	1.33043	no	no	n/a	n/a	n/a	n/a	n/a	n/a	n/a	n/a	n/a
11010216_F12	Extract	2014-11-25	1.6214	2.02724	1.82432	2014-12-05	1.35304	1.11054	1.23077	1.23077	1.27364	1.2522	no	no	n/a	n/a	n/a	n/a	n/a	n/a	n/a	n/a	n/a
11100805_D03	Extract	2014-11-19	1.68689	1.95554	1.82122	2014-11-20	1.57578	1.60814	1.28554	1.28554	1.08941	1.18748	yes	yes	Extract 41	N133553	Euphorbiaceae	Drypetes	perrieri	no	n/a	n/a	n/a
11100804_F11	Extract	2014-11-19	1.74062	1.89131	1.81596	2014-11-20	1.67251	1.29234	1.48952	1.48952	1.1728	1.33116	no	no	n/a	n/a	n/a	n/a	n/a	n/a	n/a	n/a	n/a
11100206_E04	Extract	2014-11-19	1.41755	2.1918	1.80467	2014-11-21	1.67898	2.07513	1.61347	1.61347	1.56479	1.58913	yes	yes	Extract 121	N131489	Rubiaceae	Aidia	cambodiana cf.	yes	No effect	n/a	n/a
11010341_H05	Extract	2014-11-25	1.63384	1.97093	1.80238	2014-12-05	1.11715	1.35786	1.05674	1.05674	1.26845	1.16259	no	no	n/a	n/a	n/a	n/a	n/a	n/a	n/a	n/a	n/a
11100304_B11	Extract	2014-11-19	1.92267	1.67593	1.7993	2014-12-04	1.23467	1.49159	1.18127	1.18127	1.36005	1.27066	no	no	n/a	n/a	n/a	n/a	n/a	n/a	n/a	n/a	n/a
11100701_E07	Extract	2014-11-19	2.05088	1.53349	1.79219	2014-12-04	1.13215	1.23715	1.19619	1.19619	1.21814	1.20716	no	no	n/a	n/a	n/a	n/a	n/a	n/a	n/a	n/a	n/a
11100701_D04	Extract	2014-11-19	1.91804	1.64974	1.78389	2014-12-04	1.12838	1.47859	1.22021	1.22021	1.31219	1.2662	no	no	n/a	n/a	n/a	n/a	n/a	n/a	n/a	n/a	n/a
11100807_A02	Extract	2014-11-19	1.70667	1.83213	1.7694	2014-12-04	1.43971	1.21759	1.41923	1.41923	1.07355	1.24639	yes	yes	Extract 44	N133179	Euphorbiaceae	Tannodia	cordifolia	yes	No effect	n/a	n/a
11010353_C11	Extract	2014-11-25	2.1828	1.34033	1.76156	2014-12-05	1.12173	1.23281	1.25116	1.25116	1.31197	1.28157	no	no	n/a	n/a	n/a	n/a	n/a	n/a	n/a	n/a	n/a
11100304_H08	Extract	2014-11-19	1.82332	1.69777	1.76055	2014-12-04	1.29653	1.47546	1.24564	1.24564	1.15885	1.20225	yes	yes	Extract 122	N131171	?Not specified	?Not specified	?Not specified	yes	No effect	n/a	n/a
11010353_D08	Extract	2014-11-25	2.05226	1.45975	1.756	2014-12-05	1.356	1.13788	1.36799	1.36799	1.41472	1.39135	no	no	n/a	n/a	n/a	n/a	n/a	n/a	n/a	n/a	n/a
11040303_E06	Extract	2014-11-19	1.82051	1.65744	1.73898	2014-12-05	1.26135	1.16518	1.10241	1.10241	1.1805	1.14145	no	no	n/a	n/a	n/a	n/a	n/a	n/a	n/a	n/a	n/a
11100806_E10	Extract	2014-11-19	1.78099	1.6726	1.7268	2014-11-20	1.50443	1.43842	1.29127	1.29127	1.2553	1.27329	no	no	n/a	n/a	n/a	n/a	n/a	n/a	n/a	n/a	n/a
11100102_B10	Extract	2014-11-19	1.81876	1.5951	1.70693	2014-11-21	1.69177	1.65605	1.24144	1.24144	1.49883	1.37013	no	no	n/a	n/a	n/a	n/a	n/a	n/a	This extract was previously tested by our lab and found to have no effect in seahorse
11100206_D07	Extract	2014-11-19	1.68816	1.72543	1.7068	2014-11-21	1.53049	1.57302	1.4071	1.4071	1.51029	1.4587	no	no	n/a	n/a	n/a	n/a	n/a	n/a	n/a	n/a	n/a
11100303_E09	Extract	2014-11-19	1.75565	1.65618	1.70592	2014-12-04	1.00783	1.34148	1.11828	1.11828	1.1541	1.13619	no	no	n/a	n/a	n/a	n/a	n/a	n/a	n/a	n/a	n/a
11100102_C08	Extract	2014-11-19	1.8803	1.51138	1.69584	2014-11-21	2.18582	1.90581	1.45209	1.45209	1.87314	1.66262	yes	yes	Extract 51	N131049	?Not specified	?Not specified	?Not specified	no	n/a	n/a	n/a
11100302_C10	Extract	2014-11-19	1.62179	1.76987	1.69583	2014-11-21	1.48043	1.74285	1.19966	1.19966	1.61151	1.40558	no	no	n/a	n/a	n/a	n/a	n/a	n/a	n/a	n/a	n/a
11100806_H08	Extract	2014-11-19	1.8506	1.53993	1.69527	2014-11-20	1.43578	1.37227	1.50531	1.50531	1.4364	1.47086	no	no	n/a	n/a	n/a	n/a	n/a	n/a	n/a	n/a	n/a
11100906_C05	Extract	2014-11-19	1.80789	1.57677	1.69233	2014-12-04	1.39901	1.16209	1.08719	1.08719	1.05106	1.06913	yes	yes	Extract 123	N133935	Violaceae	Rinorea	arborea	yes	No effect	n/a	n/a
11010341_G11	Extract	2014-11-25	1.5398	1.83659	1.68819	2014-12-05	1.27288	1.06668	1.10002	1.10002	1.12887	1.11445	no	no	n/a	n/a	n/a	n/a	n/a	n/a	n/a	n/a	n/a
11010353_H11	Extract	2014-11-25	1.73287	1.64262	1.68774	2014-12-05	1.08644	0.918798	1.06962	1.06962	1.32238	1.196	no	no	n/a	n/a	n/a	n/a	n/a	n/a	n/a	n/a	n/a
11100302_G07	Extract	2014-11-19	1.77121	1.59679	1.684	2014-11-21	1.75218	1.99807	1.41974	1.41974	1.80091	1.61033	yes	yes	Extract 125	N131717	Rubiaceae	Saldinia	axillaris	yes	No effect	n/a	n/a
11100305_A03	Extract	2014-11-19	1.88528	1.48228	1.68378	2014-12-04	1.4492	1.72279	1.33161	1.33161	1.35672	1.34417	yes	yes	Extract 126	N131957	Anisophylleaceae	Anisophyllea	fallax	no	n/a	n/a	n/a
11010353_A06	Extract	2014-11-25	1.66731	1.69001	1.67866	2014-12-05	1.25131	1.23418	1.48893	1.48893	1.52042	1.50467	no	no	n/a	n/a	n/a	n/a	n/a	n/a	n/a	n/a	n/a
11010353_H08	Extract	2014-11-25	1.77703	1.55993	1.66848	2014-12-05	1.17263	1.05751	1.13308	1.13308	1.27839	1.20573	no	no	n/a	n/a	n/a	n/a	n/a	n/a	n/a	n/a	n/a
11100205_H02	Extract	2014-11-19	1.85586	1.47694	1.6664	2014-11-21	1.73036	1.90978	1.87227	1.87227	1.7998	1.83604	yes	yes	Extract 127	N131287	Rubiaceae	Lasianthus	hirsutus	yes	No effect	n/a	n/a
11100906_B05	Extract	2014-11-19	1.61065	1.71506	1.66286	2014-12-04	1.22887	1.24421	0.997979	0.997979	1.07173	1.03485	no	no	n/a	n/a	n/a	n/a	n/a	n/a	n/a	n/a	n/a
11100303_D05	Extract	2014-11-19	1.8428	1.4738	1.6583	2014-12-04	1.05604	1.25638	1.1589	1.1589	1.07829	1.11859	no	no	n/a	n/a	n/a	n/a	n/a	n/a	n/a	n/a	n/a
11090302_E04	Extract	2014-11-19	1.53016	1.74429	1.63722	2014-12-05	1.07453	1.12053	1.06842	1.06842	1.16568	1.11705	no	no	n/a	n/a	n/a	n/a	n/a	n/a	n/a	n/a	n/a
11090304_B04	Extract	2014-11-19	1.6452	1.62245	1.63382	2014-12-05	1.15375	1.18515	1.21329	1.21329	1.15394	1.18362	no	no	n/a	n/a	n/a	n/a	n/a	n/a	n/a	n/a	n/a
11100805_E10	Extract	2014-11-19	1.54561	1.7143	1.62996	2014-11-20	1.41846	1.29959	1.59721	1.59721	1.19248	1.39485	no	no	n/a	n/a	n/a	n/a	n/a	n/a	n/a	n/a	n/a
11040209_E06	Extract	2014-11-19	1.58024	1.66031	1.62028	2014-12-05	1.69901	1.13508	1.00412	1.00412	1.00114	1.00263	yes	yes	Extract 130	N119153	Pyrolaceae	Pyrola	secunda	yes	Inc OCR	Chimaphilin	Fractionated.
11090304_C07	Extract	2014-11-19	1.70554	1.51961	1.61257	2014-12-05	0.984408	1.08046	1.0011	1.0011	1.11027	1.05568	no	no	n/a	n/a	n/a	n/a	n/a	n/a	n/a	n/a	n/a
11100205_D03	Extract	2014-11-19	1.60404	1.57798	1.59101	2014-11-21	1.25082	1.75567	1.1077	1.1077	1.39908	1.25339	no	no	n/a	n/a	n/a	n/a	n/a	n/a	n/a	n/a	n/a
11040209_E05	Extract	2014-11-19	1.44451	1.7352	1.58985	2014-12-05	1.07375	1.04333	0.891611	0.891611	0.943227	0.917419	no	no	n/a	n/a	n/a	n/a	n/a	n/a	n/a	n/a	n/a
11100806_E12	Extract	2014-11-19	1.50106	1.655	1.57803	2014-11-20	1.49309	1.52788	1.47775	1.47775	1.26638	1.37207	no	no	n/a	n/a	n/a	n/a	n/a	n/a	n/a	n/a	n/a
11010353_E06	Extract	2014-11-25	1.66232	1.48932	1.57582	2014-12-05	1.26352	1.25388	1.20382	1.20382	1.34872	1.27627	no	no	n/a	n/a	n/a	n/a	n/a	n/a	n/a	n/a	n/a
11100302_F02	Extract	2014-11-19	1.57852	1.57183	1.57517	2014-11-21	1.46842	1.42475	1.20859	1.20859	1.1813	1.19495	no	no	n/a	n/a	n/a	n/a	n/a	n/a	n/a	n/a	n/a
11100206_E03	Extract	2014-11-19	1.72636	1.422	1.57418	2014-11-21	1.19709	1.68961	1.13739	1.13739	1.43428	1.28584	no	no	n/a	n/a	n/a	n/a	n/a	n/a	n/a	n/a	n/a
11100702_H08	Extract	2014-11-19	1.56253	1.56663	1.56458	2014-11-20	1.53286	1.69242	1.29042	1.29042	1.3951	1.34276	no	no	n/a	n/a	n/a	n/a	n/a	n/a	n/a	n/a	n/a
11010353_D06	Extract	2014-11-25	1.66538	1.44255	1.55397	2014-12-05	1.26922	1.15239	1.22614	1.22614	1.32123	1.27369	no	no	n/a	n/a	n/a	n/a	n/a	n/a	n/a	n/a	n/a
11010353_C12	Extract	2014-11-25	1.81704	1.28308	1.55006	2014-12-05	1.25727	1.04415	1.17773	1.17773	1.47525	1.32649	no	no	n/a	n/a	n/a	n/a	n/a	n/a	n/a	n/a	n/a
11010353_H07	Extract	2014-11-25	1.4855	1.6052	1.54535	2014-12-05	1.01405	1.06632	1.0215	1.0215	1.16762	1.09456	no	no	n/a	n/a	n/a	n/a	n/a	n/a	n/a	n/a	n/a
11090204_D07	Extract	2014-11-19	1.73023	1.359	1.54462	2014-12-04	1.11545	1.18765	1.16153	1.16153	1.38234	1.27194	no	no	n/a	n/a	n/a	n/a	n/a	n/a	n/a	n/a	n/a
11100304_D08	Extract	2014-11-19	1.65707	1.42698	1.54202	2014-12-04	1.01362	1.15666	0.961215	0.961215	0.984375	0.972795	no	no	n/a	n/a	n/a	n/a	n/a	n/a	n/a	n/a	n/a
11090201_C04	Extract	2014-11-19	1.51958	1.5277	1.52364	2014-12-04	1.22816	1.31265	1.22364	1.22364	1.21979	1.22171	no	no	n/a	n/a	n/a	n/a	n/a	n/a	n/a	n/a	n/a
11010353_E03	Extract	2014-11-25	1.45111	1.58587	1.51849	2014-12-05	1.17418	1.23665	1.88431	1.88431	1.60562	1.74497	no	no	n/a	n/a	n/a	n/a	n/a	n/a	n/a	n/a	n/a
11090501_C09	Extract	2014-11-19	1.46565	1.57033	1.51799	2014-12-05	1.26992	1.10615	1.07745	1.07745	1.11027	1.09386	no	no	n/a	n/a	n/a	n/a	n/a	n/a	n/a	n/a	n/a
11100906_H03	Extract	2014-11-19	1.48346	1.5396	1.51153	2014-12-04	1.16303	1.0965	1.01543	1.01543	1.09697	1.0562	no	no	n/a	n/a	n/a	n/a	n/a	n/a	n/a	n/a	n/a
11010341_H03	Extract	2014-11-25	1.47551	1.54563	1.51057	2014-12-05	1.162	1.39434	1.05366	1.05366	1.19137	1.12251	no	no	n/a	n/a	n/a	n/a	n/a	n/a	n/a	n/a	n/a
11100302_G02	Extract	2014-11-19	1.53415	1.4856	1.50988	2014-11-21	1.55752	1.42761	1.22306	1.22306	1.34238	1.28272	no	no	n/a	n/a	n/a	n/a	n/a	n/a	n/a	n/a	n/a
11010416_H06	Extract	2014-11-25	1.53019	1.46999	1.50009	2014-12-05	1.10849	1.19745	0.727435	0.727435	0.773236	0.750336	no	no	n/a	n/a	n/a	n/a	n/a	n/a	n/a	n/a	n/a
11090304_B02	Extract	2014-11-19	1.44765	1.53989	1.49377	2014-12-05	1.51082	1.13568	1.2198	1.2198	1.11419	1.16699	no	no	n/a	n/a	n/a	n/a	n/a	n/a	n/a	n/a	n/a
11100807_B04	Extract	2014-11-19	1.38453	1.59764	1.49109	2014-12-04	1.13581	1.13955	0.992161	0.992161	0.920035	0.956098	no	no	n/a	n/a	n/a	n/a	n/a	n/a	n/a	n/a	n/a
11090501_H02	Extract	2014-11-19	1.45722	1.5249	1.49106	2014-12-05	1.03147	0.949421	1.20427	1.20427	1.26931	1.23679	no	no	n/a	n/a	n/a	n/a	n/a	n/a	n/a	n/a	n/a
11010353_E09	Extract	2014-11-25	1.59291	1.38737	1.49014	2014-12-05	1.6736	1.07426	1.21243	1.21243	1.22228	1.21736	no	no	n/a	n/a	n/a	n/a	n/a	n/a	n/a	n/a	n/a
11090302_C05	Extract	2014-11-19	1.53661	1.43572	1.48617	2014-12-05	1.1961	1.08957	0.914356	0.914356	1.0246	0.969477	no	no	n/a	n/a	n/a	n/a	n/a	n/a	n/a	n/a	n/a
11010353_F04	Extract	2014-11-25	1.54018	1.42988	1.48503	2014-12-05	1.35107	1.16757	1.25386	1.25386	1.21765	1.23576	no	no	n/a	n/a	n/a	n/a	n/a	n/a	n/a	n/a	n/a
11100302_H02	Extract	2014-11-19	1.51421	1.45052	1.48236	2014-11-21	1.78226	1.45497	1.4	1.4	1.33986	1.36993	no	no	n/a	n/a	n/a	n/a	n/a	n/a	n/a	n/a	n/a
11090302_A06	Extract	2014-11-19	1.53082	1.42812	1.47947	2014-12-05	1.15756	1.26588	0.99911	0.99911	1.09464	1.04687	no	no	n/a	n/a	n/a	n/a	n/a	n/a	n/a	n/a	n/a
11100807_C12	Extract	2014-11-19	1.49918	1.45858	1.47888	2014-12-04	1.10018	1.31619	1.16556	1.16556	1.23907	1.20232	no	no	n/a	n/a	n/a	n/a	n/a	n/a	n/a	n/a	n/a
11010353_A09	Extract	2014-11-25	1.73424	1.21405	1.47415	2014-12-05	1.19652	1.02467	1.21136	1.21136	1.33368	1.27252	no	no	n/a	n/a	n/a	n/a	n/a	n/a	n/a	n/a	n/a
11040302_A03	Extract	2014-11-19	1.50143	1.44285	1.47214	2014-12-05	1.15667	1.11202	1.12443	1.12443	1.03846	1.08144	no	no	n/a	n/a	n/a	n/a	n/a	n/a	n/a	n/a	n/a
11100805_B12	Extract	2014-11-19	1.34793	1.58967	1.4688	2014-11-20	1.32655	1.33867	1.23277	1.23277	0.955947	1.09436	no	no	n/a	n/a	n/a	n/a	n/a	n/a	n/a	n/a	n/a
11100205_E04	Extract	2014-11-19	1.49468	1.43911	1.4669	2014-11-21	1.39736	1.39365	0.896137	0.896137	1.37758	1.13686	no	no	n/a	n/a	n/a	n/a	n/a	n/a	n/a	n/a	n/a
11100805_A06	Extract	2014-11-19	1.41	1.51285	1.46143	2014-11-20	1.3876	1.40787	1.11984	1.11984	1.07249	1.09616	no	no	n/a	n/a	n/a	n/a	n/a	n/a	n/a	n/a	n/a
11100205_A12	Extract	2014-11-19	1.43327	1.48349	1.45838	2014-11-21	1.38984	1.3855	1.14055	1.14055	1.86671	1.50363	no	no	n/a	n/a	n/a	n/a	n/a	n/a	n/a	n/a	n/a
11090501_C05	Extract	2014-11-19	1.54016	1.37467	1.45742	2014-12-05	1.16375	1.22838	1.07574	1.07574	1.17969	1.12771	no	no	n/a	n/a	n/a	n/a	n/a	n/a	n/a	n/a	n/a
11100807_H08	Extract	2014-11-19	1.28647	1.62589	1.45618	2014-12-04	1.14329	1.25932	1.11181	1.11181	1.10822	1.11002	no	no	n/a	n/a	n/a	n/a	n/a	n/a	n/a	n/a	n/a
11010341_C09	Extract	2014-11-25	1.42098	1.48049	1.45074	2014-12-05	1.21625	1.01263	1.11566	1.11566	1.05575	1.08571	no	no	n/a	n/a	n/a	n/a	n/a	n/a	n/a	n/a	n/a
11100804_B05	Extract	2014-11-19	1.4563	1.4385	1.4474	2014-11-20	1.51288	1.32507	1.14392	1.14392	1.34089	1.2424	no	no	n/a	n/a	n/a	n/a	n/a	n/a	n/a	n/a	n/a
11090304_F06	Extract	2014-11-19	1.39963	1.49033	1.44498	2014-12-05	1.15065	1.11431	1.04446	1.04446	1.09039	1.06742	no	no	n/a	n/a	n/a	n/a	n/a	n/a	n/a	n/a	n/a
11100702_B07	Extract	2014-11-19	1.43961	1.44962	1.44461	2014-11-20	1.6029	1.49688	1.14363	1.14363	1.30703	1.22533	yes	yes	Extract 70	N132765	?Not specified	?Not specified	?Not specified	no	n/a	n/a	n/a
11100102_B07	Extract	2014-11-19	1.64553	1.23898	1.44225	2014-11-21	1.5157	1.61164	1.40736	1.40736	1.62857	1.51797	no	no	n/a	n/a	n/a	n/a	n/a	n/a	n/a	n/a	n/a
11010353_G06	Extract	2014-11-25	1.43115	1.4498	1.44048	2014-12-05	1.22273	1.16757	1.42913	1.42913	1.42544	1.42728	no	no	n/a	n/a	n/a	n/a	n/a	n/a	n/a	n/a	n/a
11040302_D02	Extract	2014-11-19	1.5095	1.36438	1.43694	2014-12-05	0.965832	1.17709	1.04513	1.04513	1.08366	1.0644	no	no	n/a	n/a	n/a	n/a	n/a	n/a	n/a	n/a	n/a
11090302_G08	Extract	2014-11-19	1.55596	1.31411	1.43503	2014-12-05	1.06288	1.05813	1.1944	1.1944	0.932447	1.06342	no	no	n/a	n/a	n/a	n/a	n/a	n/a	n/a	n/a	n/a
11100205_C09	Extract	2014-11-19	1.504	1.36117	1.43258	2014-11-21	1.1961	1.26891	0.994805	0.994805	1.23739	1.1161	no	no	n/a	n/a	n/a	n/a	n/a	n/a	n/a	n/a	n/a
11010353_F03	Extract	2014-11-25	1.34629	1.50289	1.42459	2014-12-05	1.51097	1.12407	1.2945	1.2945	1.27318	1.28384	no	no	n/a	n/a	n/a	n/a	n/a	n/a	n/a	n/a	n/a
11040302_G05	Extract	2014-11-19	1.45889	1.38868	1.42379	2014-12-05	1.1717	0.961333	1.02284	1.02284	1.18566	1.10425	no	no	n/a	n/a	n/a	n/a	n/a	n/a	n/a	n/a	n/a
11100807_E10	Extract	2014-11-19	1.45613	1.38496	1.42055	2014-12-04	1.06161	1.08703	0.937379	0.937379	0.917614	0.927497	no	no	n/a	n/a	n/a	n/a	n/a	n/a	n/a	n/a	n/a
11100903_C05	Extract	2014-11-19	1.44511	1.3954	1.42025	2014-12-04	1.30041	1.14631	0.990292	0.990292	0.943426	0.966859	no	no	n/a	n/a	n/a	n/a	n/a	n/a	n/a	n/a	n/a
11090205_D12	Extract	2014-11-19	1.62197	1.21822	1.4201	2014-12-04	1.06735	1.19124	1.02989	1.02989	1.00657	1.01823	no	no	n/a	n/a	n/a	n/a	n/a	n/a	n/a	n/a	n/a
11010353_C08	Extract	2014-11-25	1.59346	1.22972	1.41159	2014-12-05	1.20792	1.1046	1.0258	1.0258	1.11615	1.07097	no	no	n/a	n/a	n/a	n/a	n/a	n/a	n/a	n/a	n/a
11100205_F12	Extract	2014-11-19	1.40579	1.40997	1.40788	2014-11-21	1.34382	1.31054	1.08118	1.08118	1.29631	1.18874	no	no	n/a	n/a	n/a	n/a	n/a	n/a	n/a	n/a	n/a
11010353_C09	Extract	2014-11-25	1.60401	1.20321	1.40361	2014-12-05	1.06724	1.084	1.14116	1.14116	1.24511	1.19314	no	no	n/a	n/a	n/a	n/a	n/a	n/a	n/a	n/a	n/a
11090201_D07	Extract	2014-11-19	1.41364	1.38745	1.40054	2014-12-04	0.978395	1.24296	1.16718	1.16718	1.13165	1.14941	no	no	n/a	n/a	n/a	n/a	n/a	n/a	n/a	n/a	n/a
11090501_F12	Extract	2014-11-19	1.45186	1.34773	1.39979	2014-12-05	1.20111	1.10181	1.09858	1.09858	1.1471	1.12284	no	no	n/a	n/a	n/a	n/a	n/a	n/a	n/a	n/a	n/a
11010341_C03	Extract	2014-11-25	1.49685	1.30231	1.39958	2014-12-05	1.23481	1.21173	1.17099	1.17099	1.14215	1.15657	no	no	n/a	n/a	n/a	n/a	n/a	n/a	n/a	n/a	n/a
11090302_E12	Extract	2014-11-19	1.3303	1.46614	1.39822	2014-12-05	1.27564	1.17194	0.931257	0.931257	1.1018	1.01653	no	no	n/a	n/a	n/a	n/a	n/a	n/a	n/a	n/a	n/a
11040303_F10	Extract	2014-11-19	1.34629	1.44984	1.39806	2014-12-05	1.09071	1.04165	0.945523	0.945523	1.02723	0.986376	no	no	n/a	n/a	n/a	n/a	n/a	n/a	n/a	n/a	n/a
11100905_H06	Extract	2014-11-19	1.20436	1.58351	1.39394	2014-12-04	1.00424	1.04241	1.1081	1.1081	1.11857	1.11333	no	no	n/a	n/a	n/a	n/a	n/a	n/a	n/a	n/a	n/a
11010353_B08	Extract	2014-11-25	1.48024	1.30597	1.39311	2014-12-05	1.09191	1.03826	1.08871	1.08871	1.21389	1.1513	no	no	n/a	n/a	n/a	n/a	n/a	n/a	n/a	n/a	n/a
11090301_H12	Extract	2014-11-19	1.44342	1.32285	1.38314	2014-12-05	1.06597	1.1244	1.09208	1.09208	1.15329	1.12268	no	no	n/a	n/a	n/a	n/a	n/a	n/a	n/a	n/a	n/a
11090206_H04	Extract	2014-11-19	1.23677	1.52549	1.38113	2014-12-04	1.21369	1.47005	1.25124	1.25124	1.19144	1.22134	no	no	n/a	n/a	n/a	n/a	n/a	n/a	n/a	n/a	n/a
11040208_E07	Extract	2014-11-19	1.27644	1.48203	1.37924	2014-12-05	1.06511	1.08216	0.944701	0.944701	1.01995	0.982327	no	no	n/a	n/a	n/a	n/a	n/a	n/a	n/a	n/a	n/a
11090302_H06	Extract	2014-11-19	1.40496	1.35234	1.37865	2014-12-05	1.05049	1.07036	1.00446	1.00446	0.982608	0.993536	no	no	n/a	n/a	n/a	n/a	n/a	n/a	n/a	n/a	n/a
11090206_G10	Extract	2014-11-19	1.54579	1.20986	1.37782	2014-12-04	0.949264	1.13285	0.965321	0.965321	0.99174	0.978531	no	no	n/a	n/a	n/a	n/a	n/a	n/a	n/a	n/a	n/a
11100806_E04	Extract	2014-11-19	1.34081	1.40496	1.37288	2014-11-20	1.35052	1.35624	1.14964	1.14964	1.1811	1.16537	no	no	n/a	n/a	n/a	n/a	n/a	n/a	n/a	n/a	n/a
11090304_H05	Extract	2014-11-19	1.35563	1.37952	1.36757	2014-12-05	1.11187	1.0718	1.04617	1.04617	1.2827	1.16443	no	no	n/a	n/a	n/a	n/a	n/a	n/a	n/a	n/a	n/a
11100804_B09	Extract	2014-11-19	1.42492	1.29999	1.36245	2014-11-20	1.43735	1.28422	1.19407	1.19407	1.00943	1.10175	no	no	n/a	n/a	n/a	n/a	n/a	n/a	n/a	n/a	n/a
11090304_C02	Extract	2014-11-19	1.3434	1.37906	1.36123	2014-12-05	1.02149	1.24665	1.01912	1.01912	0.976091	0.997606	no	no	n/a	n/a	n/a	n/a	n/a	n/a	n/a	n/a	n/a
11010353_C06	Extract	2014-11-25	1.48718	1.23395	1.36056	2014-12-05	1.11396	1.06565	1.2649	1.2649	1.17774	1.22132	no	no	n/a	n/a	n/a	n/a	n/a	n/a	n/a	n/a	n/a
11040208_B05	Extract	2014-11-19	1.35632	1.35902	1.35767	2014-12-05	1.24768	1.0722	1.02257	1.02257	0.951108	0.986839	no	no	n/a	n/a	n/a	n/a	n/a	n/a	n/a	n/a	n/a
11100701_C08	Extract	2014-11-19	1.52719	1.1873	1.35725	2014-12-04	1.09448	1.18309	1.14481	1.14481	1.21619	1.1805	no	no	n/a	n/a	n/a	n/a	n/a	n/a	n/a	n/a	n/a
11090302_C03	Extract	2014-11-19	1.36096	1.35165	1.35631	2014-12-05	1.21967	1.05453	0.939132	0.939132	0.983257	0.961194	no	no	n/a	n/a	n/a	n/a	n/a	n/a	n/a	n/a	n/a
11090501_G07	Extract	2014-11-19	1.3774	1.32655	1.35198	2014-12-05	0.981549	1.0754	0.988684	0.988684	1.02852	1.0086	no	no	n/a	n/a	n/a	n/a	n/a	n/a	n/a	n/a	n/a
11040208_G04	Extract	2014-11-19	1.28531	1.41782	1.35156	2014-12-05	1.00003	1.05643	1.12084	1.12084	1.28316	1.202	no	no	n/a	n/a	n/a	n/a	n/a	n/a	n/a	n/a	n/a
11100906_B03	Extract	2014-11-19	1.24145	1.45901	1.35023	2014-12-04	1.21026	1.11429	0.915424	0.915424	0.745978	0.830701	no	no	n/a	n/a	n/a	n/a	n/a	n/a	n/a	n/a	n/a
11040209_G06	Extract	2014-11-19	1.33625	1.35867	1.34746	2014-12-05	1.05009	1.13703	0.804158	0.804158	0.8771	0.840629	no	no	n/a	n/a	n/a	n/a	n/a	n/a	n/a	n/a	n/a
11040303_E02	Extract	2014-11-19	1.27841	1.41192	1.34516	2014-12-05	1.18894	1.16641	0.941662	0.941662	0.935014	0.938338	no	no	n/a	n/a	n/a	n/a	n/a	n/a	n/a	n/a	n/a
11010353_G08	Extract	2014-11-25	1.38206	1.29935	1.3407	2014-12-05	1.18612	1.10482	1.22347	1.22347	1.40574	1.31461	no	no	n/a	n/a	n/a	n/a	n/a	n/a	n/a	n/a	n/a
11040303_B06	Extract	2014-11-19	1.31265	1.36671	1.33968	2014-12-05	1.15471	1.16129	1.03054	1.03054	1.04088	1.03571	no	no	n/a	n/a	n/a	n/a	n/a	n/a	n/a	n/a	n/a
11010353_H09	Extract	2014-11-25	1.38845	1.28368	1.33606	2014-12-05	1.09111	0.972635	1.05377	1.05377	1.10398	1.07887	no	no	n/a	n/a	n/a	n/a	n/a	n/a	n/a	n/a	n/a
11090302_D08	Extract	2014-11-19	1.39985	1.26647	1.33316	2014-12-05	0.908825	1.07757	0.842859	0.842859	1.01387	0.928362	no	no	n/a	n/a	n/a	n/a	n/a	n/a	n/a	n/a	n/a
11090304_D08	Extract	2014-11-19	1.34673	1.30835	1.32754	2014-12-05	0.98084	1.01781	0.904491	0.904491	0.914224	0.909357	no	no	n/a	n/a	n/a	n/a	n/a	n/a	n/a	n/a	n/a
11010353_G05	Extract	2014-11-25	1.31413	1.33671	1.32542	2014-12-05	1.25026	1.07381	1.15567	1.15567	1.27522	1.21545	no	no	n/a	n/a	n/a	n/a	n/a	n/a	n/a	n/a	n/a
11100303_G10	Extract	2014-11-19	1.41398	1.2265	1.32024	2014-12-04	1.23794	1.41098	1.26942	1.26942	1.18065	1.22504	no	no	n/a	n/a	n/a	n/a	n/a	n/a	n/a	n/a	n/a
11100206_E09	Extract	2014-11-19	1.57342	1.06397	1.3187	2014-11-21	1.37584	1.39829	0.846815	0.846815	1.37059	1.1087	no	no	n/a	n/a	n/a	n/a	n/a	n/a	n/a	n/a	n/a
11100906_D11	Extract	2014-11-19	1.28485	1.35003	1.31744	2014-12-04	1.06231	1.131	1.00169	1.00169	0.975956	0.988823	no	no	n/a	n/a	n/a	n/a	n/a	n/a	n/a	n/a	n/a
11100303_F09	Extract	2014-11-19	1.42039	1.20978	1.31508	2014-12-04	0.865294	1.11536	1.08544	1.08544	0.976838	1.03114	no	no	n/a	n/a	n/a	n/a	n/a	n/a	n/a	n/a	n/a
11100903_D11	Extract	2014-11-19	1.33151	1.29816	1.31484	2014-12-04	1.05913	1.08297	1.03794	1.03794	0.948298	0.993119	no	no	n/a	n/a	n/a	n/a	n/a	n/a	n/a	n/a	n/a
11100903_H07	Extract	2014-11-19	1.25306	1.37629	1.31468	2014-12-04	1.44949	1.17112	1.0869	1.0869	1.05957	1.07323	no	no	n/a	n/a	n/a	n/a	n/a	n/a	n/a	n/a	n/a
11090304_A07	Extract	2014-11-19	1.27899	1.3445	1.31175	2014-12-05	1.11426	1.06101	1.08731	1.08731	1.25987	1.17359	no	no	n/a	n/a	n/a	n/a	n/a	n/a	n/a	n/a	n/a
11090501_E02	Extract	2014-11-19	1.35651	1.26256	1.30954	2014-12-05	1.08308	1.13184	1.01517	1.01517	0.995286	1.00523	no	no	n/a	n/a	n/a	n/a	n/a	n/a	n/a	n/a	n/a
11010353_C04	Extract	2014-11-25	1.36598	1.25264	1.30931	2014-12-05	1.01224	1.18432	1.08871	1.08871	0.98781	1.03826	no	no	n/a	n/a	n/a	n/a	n/a	n/a	n/a	n/a	n/a
11100805_E06	Extract	2014-11-19	1.44474	1.1709	1.30782	2014-11-20	1.65849	1.63433	1.05167	1.05167	1.09958	1.07562	yes	yes	Extract 72	N133603	Bignoniaceae	Stereospermum	euphoroides cf.	no	n/a	n/a	n/a
11100805_B07	Extract	2014-11-19	1.35638	1.25095	1.30367	2014-11-20	1.42024	1.45224	1.06398	1.06398	1.08697	1.07547	no	no	n/a	n/a	n/a	n/a	n/a	n/a	n/a	n/a	n/a
11100302_H12	Extract	2014-11-19	1.36901	1.23749	1.30325	2014-11-21	1.26006	1.24313	1.09561	1.09561	1.19498	1.1453	no	no	n/a	n/a	n/a	n/a	n/a	n/a	n/a	n/a	n/a
11090205_H11	Extract	2014-11-19	1.39835	1.19336	1.29585	2014-12-04	1.06113	1.32931	1.21768	1.21768	1.3412	1.27944	no	no	n/a	n/a	n/a	n/a	n/a	n/a	n/a	n/a	n/a
11100806_G05	Extract	2014-11-19	1.33013	1.25923	1.29468	2014-11-20	1.28859	1.30375	1.21328	1.21328	1.2553	1.23429	no	no	n/a	n/a	n/a	n/a	n/a	n/a	n/a	n/a	n/a
11100906_C12	Extract	2014-11-19	1.28485	1.30425	1.29455	2014-12-04	1.23455	1.21466	1.21829	1.21829	1.14989	1.18409	no	no	n/a	n/a	n/a	n/a	n/a	n/a	n/a	n/a	n/a
11100805_E11	Extract	2014-11-19	1.23006	1.35428	1.29217	2014-11-20	1.33388	1.33253	1.23938	1.23938	1.1574	1.19839	no	no	n/a	n/a	n/a	n/a	n/a	n/a	n/a	n/a	n/a
11100102_D04	Extract	2014-11-19	1.32914	1.255	1.29207	2014-11-21	1.21007	1.30923	1.04627	1.04627	1.2162	1.13123	no	no	n/a	n/a	n/a	n/a	n/a	n/a	n/a	n/a	n/a
11090204_D04	Extract	2014-11-19	1.24742	1.33234	1.28988	2014-12-04	0.99883	1.02025	1.11702	1.11702	1.10472	1.11087	no	no	n/a	n/a	n/a	n/a	n/a	n/a	n/a	n/a	n/a
11100302_H03	Extract	2014-11-19	1.27465	1.30313	1.28889	2014-11-21	1.36157	1.21692	1.10193	1.10193	1.26782	1.18488	no	no	n/a	n/a	n/a	n/a	n/a	n/a	n/a	n/a	n/a
11040209_A06	Extract	2014-11-19	1.28234	1.29221	1.28728	2014-12-05	1.2463	1.0346	1.07763	1.07763	1.12464	1.10114	no	no	n/a	n/a	n/a	n/a	n/a	n/a	n/a	n/a	n/a
11100806_C04	Extract	2014-11-19	1.27876	1.29333	1.28604	2014-11-20	1.26906	1.31694	1.15224	1.15224	1.16141	1.15683	no	no	n/a	n/a	n/a	n/a	n/a	n/a	n/a	n/a	n/a
11010353_F06	Extract	2014-11-25	1.30695	1.26319	1.28507	2014-12-05	1.00368	0.922868	0.988457	0.988457	0.901716	0.945087	no	no	n/a	n/a	n/a	n/a	n/a	n/a	n/a	n/a	n/a
11100903_A02	Extract	2014-11-19	1.3201	1.24892	1.28451	2014-12-04	1.67495	1.22617	1.08719	1.08719	1.49241	1.2898	no	no	n/a	n/a	n/a	n/a	n/a	n/a	n/a	n/a	n/a
11010341_C11	Extract	2014-11-25	1.30736	1.26082	1.28409	2014-12-05	1.17725	1.06645	1.08185	1.08185	0.995871	1.03886	no	no	n/a	n/a	n/a	n/a	n/a	n/a	n/a	n/a	n/a
11100806_G06	Extract	2014-11-19	1.40423	1.16242	1.28332	2014-11-20	1.317	1.2717	1.17803	1.17803	1.20142	1.18972	no	no	n/a	n/a	n/a	n/a	n/a	n/a	n/a	n/a	n/a
11010353_A07	Extract	2014-11-25	1.23434	1.33009	1.28221	2014-12-05	1.25415	1.09713	1.11533	1.11533	1.04417	1.07975	no	no	n/a	n/a	n/a	n/a	n/a	n/a	n/a	n/a	n/a
11010341_E06	Extract	2014-11-25	1.28793	1.2676	1.27777	2014-12-05	1.10188	1.11796	1.11371	1.11371	1.09135	1.10253	no	no	n/a	n/a	n/a	n/a	n/a	n/a	n/a	n/a	n/a
11040208_H04	Extract	2014-11-19	1.20979	1.34401	1.2769	2014-12-05	1.18921	1.13775	1.06523	1.06523	1.13496	1.1001	no	no	n/a	n/a	n/a	n/a	n/a	n/a	n/a	n/a	n/a
11090302_A07	Extract	2014-11-19	1.35363	1.19629	1.27496	2014-12-05	1.10807	1.18468	1.06447	1.06447	1.15916	1.11182	no	no	n/a	n/a	n/a	n/a	n/a	n/a	n/a	n/a	n/a
11040209_C04	Extract	2014-11-19	1.19525	1.35258	1.27392	2014-12-05	0.967769	1.03072	0.984594	0.984594	0.96536	0.974977	no	no	n/a	n/a	n/a	n/a	n/a	n/a	n/a	n/a	n/a
11090501_B09	Extract	2014-11-19	1.31562	1.23011	1.27287	2014-12-05	1.05406	1.03365	1.07941	1.07941	1.04512	1.06227	no	no	n/a	n/a	n/a	n/a	n/a	n/a	n/a	n/a	n/a
11010341_E11	Extract	2014-11-25	1.17653	1.36115	1.26884	2014-12-05	1.19136	1.06901	1.13327	1.13327	1.04928	1.09127	no	no	n/a	n/a	n/a	n/a	n/a	n/a	n/a	n/a	n/a
11040303_D10	Extract	2014-11-19	1.18011	1.35741	1.26876	2014-12-05	1.03257	0.986319	0.908368	0.908368	0.985379	0.946873	no	no	n/a	n/a	n/a	n/a	n/a	n/a	n/a	n/a	n/a
11090206_D07	Extract	2014-11-19	1.23991	1.29599	1.26795	2014-12-04	0.973416	1.19302	0.997607	0.997607	1.09054	1.04407	no	no	n/a	n/a	n/a	n/a	n/a	n/a	n/a	n/a	n/a
11090304_B05	Extract	2014-11-19	1.21569	1.31826	1.26698	2014-12-05	0.94352	1.17385	1.05659	1.05659	0.991719	1.02416	no	no	n/a	n/a	n/a	n/a	n/a	n/a	n/a	n/a	n/a
11090204_B02	Extract	2014-11-19	1.24162	1.29004	1.26583	2014-12-04	1.09326	1.21607	1.33029	1.33029	1.08328	1.20679	no	no	n/a	n/a	n/a	n/a	n/a	n/a	n/a	n/a	n/a
11090204_C10	Extract	2014-11-19	1.38356	1.14669	1.26513	2014-12-04	0.998335	1.17483	1.07157	1.07157	1.07568	1.07362	no	no	n/a	n/a	n/a	n/a	n/a	n/a	n/a	n/a	n/a
11040209_F05	Extract	2014-11-19	1.16754	1.35849	1.26301	2014-12-05	0.923552	1.0642	0.879509	0.879509	0.967172	0.92334	no	no	n/a	n/a	n/a	n/a	n/a	n/a	n/a	n/a	n/a
11010353_A03	Extract	2014-11-25	1.27534	1.24752	1.26143	2014-12-05	1.10695	0.985769	1.14653	1.14653	1.21389	1.18021	no	no	n/a	n/a	n/a	n/a	n/a	n/a	n/a	n/a	n/a
11090205_E07	Extract	2014-11-19	1.26388	1.25281	1.25835	2014-12-04	1.06636	1.08831	0.927733	0.927733	1.16692	1.04732	no	no	n/a	n/a	n/a	n/a	n/a	n/a	n/a	n/a	n/a
11040208_E05	Extract	2014-11-19	1.25874	1.25059	1.25467	2014-12-05	0.964421	1.12852	1.01542	1.01542	0.989939	1.00268	no	no	n/a	n/a	n/a	n/a	n/a	n/a	n/a	n/a	n/a
11090304_G11	Extract	2014-11-19	1.32895	1.17879	1.25387	2014-12-05	1.20064	1.06843	1.13521	1.13521	1.15916	1.14719	no	no	n/a	n/a	n/a	n/a	n/a	n/a	n/a	n/a	n/a
11010341_H09	Extract	2014-11-25	1.22399	1.28252	1.25325	2014-12-05	0.99767	1.04766	0.903454	0.903454	1.01884	0.961146	no	no	n/a	n/a	n/a	n/a	n/a	n/a	n/a	n/a	n/a
11100303_C10	Extract	2014-11-19	1.40075	1.10506	1.25291	2014-12-04	0.885614	1.08103	1.03684	1.03684	1.13115	1.084	no	no	n/a	n/a	n/a	n/a	n/a	n/a	n/a	n/a	n/a
11010341_B03	Extract	2014-11-25	1.31194	1.19307	1.2525	2014-12-05	1.23246	1.1205	0.991375	0.991375	0.971293	0.981334	no	no	n/a	n/a	n/a	n/a	n/a	n/a	n/a	n/a	n/a
11040302_C02	Extract	2014-11-19	1.23594	1.26863	1.25228	2014-12-05	1.11937	1.02611	1.05009	1.05009	1.04604	1.04806	no	no	n/a	n/a	n/a	n/a	n/a	n/a	n/a	n/a	n/a
11040208_D07	Extract	2014-11-19	1.18069	1.31399	1.24734	2014-12-05	1.04425	1.06178	0.826966	0.826966	0.972335	0.899651	no	no	n/a	n/a	n/a	n/a	n/a	n/a	n/a	n/a	n/a
11100206_D08	Extract	2014-11-19	1.24985	1.24467	1.24726	2014-11-21	1.21834	1.40049	0.975902	0.975902	1.20474	1.09032	no	no	n/a	n/a	n/a	n/a	n/a	n/a	n/a	n/a	n/a
11100903_H12	Extract	2014-11-19	1.13676	1.35306	1.24491	2014-12-04	1.14466	1.16209	1.124	1.124	1.20618	1.16509	no	no	n/a	n/a	n/a	n/a	n/a	n/a	n/a	n/a	n/a
11040302_E05	Extract	2014-11-19	1.19465	1.29453	1.24459	2014-12-05	0.992507	1.02828	0.873458	0.873458	1.00902	0.94124	no	no	n/a	n/a	n/a	n/a	n/a	n/a	n/a	n/a	n/a
11100701_C04	Extract	2014-11-19	1.3478	1.13919	1.24349	2014-12-04	1.09875	0.996294	1.0258	1.0258	1.11997	1.07289	no	no	n/a	n/a	n/a	n/a	n/a	n/a	n/a	n/a	n/a
11040208_E02	Extract	2014-11-19	1.21431	1.26666	1.24049	2014-12-05	1.23072	1.16785	1.04072	1.04072	1.05848	1.0496	no	no	n/a	n/a	n/a	n/a	n/a	n/a	n/a	n/a	n/a
11090501_B02	Extract	2014-11-19	1.26921	1.20825	1.23873	2014-12-05	1.01958	1.12824	1.01321	1.01321	1.08488	1.04904	no	no	n/a	n/a	n/a	n/a	n/a	n/a	n/a	n/a	n/a
11010341_A12	Extract	2014-11-25	1.28118	1.19363	1.2374	2014-12-05	1.08051	0.965795	1.13774	1.13774	1.19104	1.16439	no	no	n/a	n/a	n/a	n/a	n/a	n/a	n/a	n/a	n/a
11100701_C12	Extract	2014-11-19	1.29379	1.17998	1.23688	2014-12-04	1.14321	0.999181	1.17326	1.17326	1.19662	1.18494	no	no	n/a	n/a	n/a	n/a	n/a	n/a	n/a	n/a	n/a
11090501_F02	Extract	2014-11-19	1.22213	1.24783	1.23498	2014-12-05	0.99391	1.58654	0.957434	0.957434	0.943536	0.950485	no	no	n/a	n/a	n/a	n/a	n/a	n/a	n/a	n/a	n/a
11090304_G05	Extract	2014-11-19	1.28275	1.18318	1.23297	2014-12-05	0.91263	1.02139	1.19552	1.19552	1.03569	1.11561	no	no	n/a	n/a	n/a	n/a	n/a	n/a	n/a	n/a	n/a
11100905_D02	Extract	2014-11-19	1.1777	1.28667	1.23219	2014-12-04	1.13058	1.26452	1.15259	1.15259	0.889351	1.02097	no	no	n/a	n/a	n/a	n/a	n/a	n/a	n/a	n/a	n/a
11010341_B02	Extract	2014-11-25	1.26553	1.19552	1.23052	2014-12-05	1.16881	1.15904	1.07654	1.07654	0.945749	1.01115	no	no	n/a	n/a	n/a	n/a	n/a	n/a	n/a	n/a	n/a
11040208_C09	Extract	2014-11-19	1.1699	1.28791	1.22891	2014-12-05	1.15999	1.18437	1.06909	1.06909	1.01995	1.04452	no	no	n/a	n/a	n/a	n/a	n/a	n/a	n/a	n/a	n/a
11100302_F03	Extract	2014-11-19	1.2441	1.21366	1.22888	2014-11-21	1.23258	1.26207	1.1387	1.1387	1.22205	1.18037	no	no	n/a	n/a	n/a	n/a	n/a	n/a	n/a	n/a	n/a
11100302_D02	Extract	2014-11-19	1.45567	0.996555	1.22611	2014-11-21	0.715742	1.23036	0.95175	0.95175	1.20083	1.07629	no	no	n/a	n/a	n/a	n/a	n/a	n/a	n/a	n/a	n/a
11040209_E08	Extract	2014-11-19	1.1689	1.28185	1.22538	2014-12-05	1.02004	1.03921	0.829458	0.829458	0.92046	0.874959	no	no	n/a	n/a	n/a	n/a	n/a	n/a	n/a	n/a	n/a
11090206_A12	Extract	2014-11-19	1.46285	0.98588	1.22436	2014-12-04	0.964944	1.04864	1.05809	1.05809	1.12543	1.09176	no	no	n/a	n/a	n/a	n/a	n/a	n/a	n/a	n/a	n/a
11040209_E07	Extract	2014-11-19	1.14906	1.29719	1.22313	2014-12-05	0.999203	1.10886	0.801941	0.801941	0.840746	0.821343	no	no	n/a	n/a	n/a	n/a	n/a	n/a	n/a	n/a	n/a
11090301_E06	Extract	2014-11-19	1.23523	1.20686	1.22105	2014-12-05	0.85489	1.14503	0.981369	0.981369	1.0282	1.00478	no	no	n/a	n/a	n/a	n/a	n/a	n/a	n/a	n/a	n/a
11090201_B04	Extract	2014-11-19	1.15664	1.2832	1.21992	2014-12-04	1.06435	1.1024	1.04742	1.04742	1.11056	1.07899	no	no	n/a	n/a	n/a	n/a	n/a	n/a	n/a	n/a	n/a
11100804_D04	Extract	2014-11-19	1.33437	1.10154	1.21796	2014-11-20	1.31324	1.21487	1.02215	1.02215	0.982365	1.00226	no	no	n/a	n/a	n/a	n/a	n/a	n/a	n/a	n/a	n/a
11010341_E12	Extract	2014-11-25	1.1466	1.28928	1.21794	2014-12-05	1.23246	1.16229	1.05029	1.05029	1.18682	1.11856	no	no	n/a	n/a	n/a	n/a	n/a	n/a	n/a	n/a	n/a
11100905_G04	Extract	2014-11-19	1.23472	1.20058	1.21765	2014-12-04	1.10359	1.12061	0.989239	0.989239	0.95895	0.974094	no	no	n/a	n/a	n/a	n/a	n/a	n/a	n/a	n/a	n/a
11040208_F09	Extract	2014-11-19	1.18266	1.25167	1.21717	2014-12-05	0.923829	0.957209	0.960089	0.960089	0.96687	0.963479	no	no	n/a	n/a	n/a	n/a	n/a	n/a	n/a	n/a	n/a
11100806_G11	Extract	2014-11-19	1.35996	1.07374	1.21685	2014-11-20	1.23334	1.37558	0.912494	0.912494	1.02265	0.967572	no	no	n/a	n/a	n/a	n/a	n/a	n/a	n/a	n/a	n/a
11040303_A05	Extract	2014-11-19	1.33605	1.09731	1.21668	2014-12-05	1.10017	0.971294	0.946618	0.946618	0.971731	0.959174	no	no	n/a	n/a	n/a	n/a	n/a	n/a	n/a	n/a	n/a
11100303_G02	Extract	2014-11-19	1.29268	1.14012	1.2164	2014-12-04	1.04575	1.20905	1.06389	1.06389	1.10682	1.08535	no	no	n/a	n/a	n/a	n/a	n/a	n/a	n/a	n/a	n/a
11040208_B03	Extract	2014-11-19	1.27488	1.15599	1.21544	2014-12-05	1.21874	1.17974	1.11093	1.11093	0.962944	1.03694	no	no	n/a	n/a	n/a	n/a	n/a	n/a	n/a	n/a	n/a
11090302_F07	Extract	2014-11-19	1.53016	0.900463	1.21531	2014-12-05	1.10402	1.02091	0.992636	0.992636	0.979982	0.986309	no	no	n/a	n/a	n/a	n/a	n/a	n/a	n/a	n/a	n/a
11001218_E06	Extract	2014-11-25	1.2391	1.19145	1.21528	2014-12-05	0.9538	1.08198	1.07096	1.07096	1.16254	1.11675	no	no	n/a	n/a	n/a	n/a	n/a	n/a	n/a	n/a	n/a
11090304_H04	Extract	2014-11-19	1.13823	1.29086	1.21455	2014-12-05	0.882212	0.89737	0.912394	0.912394	1.08095	0.996674	no	no	n/a	n/a	n/a	n/a	n/a	n/a	n/a	n/a	n/a
11010353_C02	Extract	2014-11-25	1.26898	1.15833	1.21365	2014-12-05	1.16977	1.11818	1.16535	1.16535	1.01294	1.08915	no	no	n/a	n/a	n/a	n/a	n/a	n/a	n/a	n/a	n/a
11001218_F05	Extract	2014-11-25	1.25502	1.17115	1.21308	2014-12-05	1.14791	1.08687	1.05868	1.05868	1.02467	1.04168	no	no	n/a	n/a	n/a	n/a	n/a	n/a	n/a	n/a	n/a
11100805_A03	Extract	2014-11-19	1.17694	1.24753	1.21224	2014-11-20	1.17082	1.27808	1.05509	1.05509	1.17556	1.11532	no	no	n/a	n/a	n/a	n/a	n/a	n/a	n/a	n/a	n/a
11040302_B06	Extract	2014-11-19	1.15772	1.26613	1.21193	2014-12-05	1.04536	1.11735	1.06304	1.06304	0.940479	1.00176	no	no	n/a	n/a	n/a	n/a	n/a	n/a	n/a	n/a	n/a
11010353_B04	Extract	2014-11-25	1.2662	1.15653	1.21136	2014-12-05	1.16925	0.978078	1.01399	1.01399	1.11497	1.06448	no	no	n/a	n/a	n/a	n/a	n/a	n/a	n/a	n/a	n/a
11100302_C03	Extract	2014-11-19	1.32227	1.09916	1.21072	2014-11-21	1.13263	1.18146	0.875928	0.875928	1.0831	0.979516	no	no	n/a	n/a	n/a	n/a	n/a	n/a	n/a	n/a	n/a
11100102_B12	Extract	2014-11-19	1.43127	0.988959	1.21012	2014-11-21	0.781291	0.988251	0.895353	0.895353	1.1375	1.01643	no	no	n/a	n/a	n/a	n/a	n/a	n/a	n/a	n/a	n/a
11090204_B04	Extract	2014-11-19	1.26268	1.15724	1.20996	2014-12-04	1.14612	1.09752	1.11889	1.11889	1.03835	1.07862	no	no	n/a	n/a	n/a	n/a	n/a	n/a	n/a	n/a	n/a
11100701_B07	Extract	2014-11-19	1.37316	1.04666	1.20991	2014-12-04	1.12511	1.33642	1.11801	1.11801	1.09759	1.1078	no	no	n/a	n/a	n/a	n/a	n/a	n/a	n/a	n/a	n/a
11010535_B05	Extract	2014-11-25	1.32939	1.08937	1.20938	2014-12-05	1.18068	1.13721	0.966964	0.966964	0.921356	0.94416	no	no	n/a	n/a	n/a	n/a	n/a	n/a	n/a	n/a	n/a
11100304_G04	Extract	2014-11-19	1.36656	1.04987	1.20821	2014-12-04	1.00232	1.10959	1.16469	1.16469	0.984375	1.07453	no	no	n/a	n/a	n/a	n/a	n/a	n/a	n/a	n/a	n/a
11100903_A03	Extract	2014-11-19	1.22535	1.18864	1.20699	2014-12-04	1.18392	0.979989	0.981842	0.981842	1.1055	1.04367	no	no	n/a	n/a	n/a	n/a	n/a	n/a	n/a	n/a	n/a
11100807_H11	Extract	2014-11-19	1.21701	1.19645	1.20673	2014-12-04	1.00334	1.02235	0.870197	0.870197	0.969269	0.919733	no	no	n/a	n/a	n/a	n/a	n/a	n/a	n/a	n/a	n/a
11040303_D06	Extract	2014-11-19	1.1027	1.30649	1.2046	2014-12-05	0.963314	1.14745	0.817903	0.817903	0.78253	0.800217	no	no	n/a	n/a	n/a	n/a	n/a	n/a	n/a	n/a	n/a
11010353_C10	Extract	2014-11-25	1.18335	1.2258	1.20457	2014-12-05	1.01405	0.995934	0.998669	0.998669	1.0115	1.00509	no	no	n/a	n/a	n/a	n/a	n/a	n/a	n/a	n/a	n/a
11100906_G08	Extract	2014-11-19	1.2058	1.20273	1.20426	2014-12-04	1.07319	1.16865	1.15445	1.15445	0.942821	1.04864	no	no	n/a	n/a	n/a	n/a	n/a	n/a	n/a	n/a	n/a
11100302_A07	Extract	2014-11-19	1.19674	1.21134	1.20404	2014-11-21	1.20682	1.29225	1.16313	1.16313	1.27034	1.21674	no	no	n/a	n/a	n/a	n/a	n/a	n/a	n/a	n/a	n/a
11010341_A02	Extract	2014-11-25	1.17088	1.23588	1.20338	2014-12-05	1.12114	1.26027	1.22772	1.22772	1.06416	1.14594	no	no	n/a	n/a	n/a	n/a	n/a	n/a	n/a	n/a	n/a
11100903_G11	Extract	2014-11-19	1.16954	1.23592	1.20273	2014-12-04	1.04915	1.07868	0.90721	0.90721	0.979315	0.943263	no	no	n/a	n/a	n/a	n/a	n/a	n/a	n/a	n/a	n/a
11100805_C04	Extract	2014-11-19	1.14895	1.25519	1.20207	2014-11-20	1.23202	1.21509	1.07601	1.07601	0.99314	1.03457	no	no	n/a	n/a	n/a	n/a	n/a	n/a	n/a	n/a	n/a
11090301_D11	Extract	2014-11-19	1.1238	1.2798	1.2018	2014-12-05	0.968951	1.07397	0.947288	0.947288	1.04088	0.994082	no	no	n/a	n/a	n/a	n/a	n/a	n/a	n/a	n/a	n/a
11040209_E02	Extract	2014-11-19	1.18561	1.21739	1.2015	2014-12-05	1.01644	1.11735	0.968084	0.968084	0.973241	0.970662	no	no	n/a	n/a	n/a	n/a	n/a	n/a	n/a	n/a	n/a
11090302_C06	Extract	2014-11-19	1.26965	1.13302	1.20134	2014-12-05	0.931869	1.07924	0.892383	0.892383	0.985202	0.938792	no	no	n/a	n/a	n/a	n/a	n/a	n/a	n/a	n/a	n/a
11040209_C05	Extract	2014-11-19	1.19742	1.20436	1.20089	2014-12-05	1.06511	0.979783	0.810483	0.810483	0.898931	0.854707	no	no	n/a	n/a	n/a	n/a	n/a	n/a	n/a	n/a	n/a
11090204_D03	Extract	2014-11-19	1.08307	1.31406	1.19856	2014-12-04	0.994842	1.25474	0.999478	0.999478	1.13062	1.06505	no	no	n/a	n/a	n/a	n/a	n/a	n/a	n/a	n/a	n/a
11090302_E02	Extract	2014-11-19	1.20948	1.18708	1.19828	2014-12-05	0.986536	1.00364	0.934059	0.934059	0.994638	0.964348	no	no	n/a	n/a	n/a	n/a	n/a	n/a	n/a	n/a	n/a
11090301_F08	Extract	2014-11-19	1.17906	1.21561	1.19733	2014-12-05	0.972284	1.031	0.948409	0.948409	1.02982	0.989114	no	no	n/a	n/a	n/a	n/a	n/a	n/a	n/a	n/a	n/a
11040302_C10	Extract	2014-11-19	1.21922	1.17473	1.19698	2014-12-05	0.981106	1.02563	0.950752	0.950752	0.911673	0.931213	no	no	n/a	n/a	n/a	n/a	n/a	n/a	n/a	n/a	n/a
11010353_G12	Extract	2014-11-25	1.37958	1.01258	1.19608	2014-12-05	1.10721	1.05524	0.957554	0.957554	1.0375	0.997527	no	no	n/a	n/a	n/a	n/a	n/a	n/a	n/a	n/a	n/a
11020708_C05	Extract	2014-11-24	1.26127	1.13079	1.19603	2014-12-05	1.09597	1.02359	0.852805	0.852805	0.97351	0.913157	no	no	n/a	n/a	n/a	n/a	n/a	n/a	n/a	n/a	n/a
11090501_C07	Extract	2014-11-19	1.34074	1.05026	1.1955	2014-12-05	0.924731	1.13518	0.957994	0.957994	0.972167	0.965081	no	no	n/a	n/a	n/a	n/a	n/a	n/a	n/a	n/a	n/a
11100701_C11	Extract	2014-11-19	1.281	1.10941	1.1952	2014-12-04	1.15804	1.22539	1.09813	1.09813	1.12192	1.11002	no	no	n/a	n/a	n/a	n/a	n/a	n/a	n/a	n/a	n/a
11010341_F10	Extract	2014-11-25	1.18409	1.20553	1.19481	2014-12-05	1.02934	1.10635	0.979374	0.979374	1.12143	1.0504	no	no	n/a	n/a	n/a	n/a	n/a	n/a	n/a	n/a	n/a
11100805_G08	Extract	2014-11-19	1.15228	1.23199	1.19214	2014-11-20	1.21162	1.23878	0.971197	0.971197	1.09312	1.03216	no	no	n/a	n/a	n/a	n/a	n/a	n/a	n/a	n/a	n/a
11001218_G09	Extract	2014-11-25	1.18165	1.20174	1.19169	2014-12-05	1.18572	1.08941	1.05171	1.05171	1.18618	1.11895	no	no	n/a	n/a	n/a	n/a	n/a	n/a	n/a	n/a	n/a
11090206_C03	Extract	2014-11-19	1.13365	1.24862	1.19114	2014-12-04	0.976661	1.09291	1.06592	1.06592	0.978255	1.02209	no	no	n/a	n/a	n/a	n/a	n/a	n/a	n/a	n/a	n/a
11100303_G12	Extract	2014-11-19	1.20166	1.18021	1.19093	2014-12-04	1.10928	1.11033	1.03324	1.03324	1.00785	1.02054	no	no	n/a	n/a	n/a	n/a	n/a	n/a	n/a	n/a	n/a
11090301_E09	Extract	2014-11-19	1.21413	1.16753	1.19083	2014-12-05	0.994146	1.01564	0.909283	0.909283	0.953296	0.93129	no	no	n/a	n/a	n/a	n/a	n/a	n/a	n/a	n/a	n/a
11090206_D02	Extract	2014-11-19	1.14793	1.23188	1.18991	2014-12-04	0.99509	1.08703	1.03647	1.03647	0.959609	0.998042	no	no	n/a	n/a	n/a	n/a	n/a	n/a	n/a	n/a	n/a
11040303_E08	Extract	2014-11-19	1.16144	1.21525	1.18835	2014-12-05	0.969706	1.13993	0.781597	0.781597	0.923208	0.852402	no	no	n/a	n/a	n/a	n/a	n/a	n/a	n/a	n/a	n/a
11090206_B05	Extract	2014-11-19	1.32492	1.04767	1.1863	2014-12-04	1.00606	1.00387	1.04867	1.04867	1.03595	1.04231	no	no	n/a	n/a	n/a	n/a	n/a	n/a	n/a	n/a	n/a
11100906_G05	Extract	2014-11-19	1.20071	1.16869	1.1847	2014-12-04	1.12583	1.101	1.04589	1.04589	0.997834	1.02186	no	no	n/a	n/a	n/a	n/a	n/a	n/a	n/a	n/a	n/a
11040303_B11	Extract	2014-11-19	1.21725	1.15189	1.18457	2014-12-05	1.11213	0.982195	0.903713	0.903713	0.972637	0.938175	no	no	n/a	n/a	n/a	n/a	n/a	n/a	n/a	n/a	n/a
11010353_F02	Extract	2014-11-25	1.20857	1.16043	1.1845	2014-12-05	1.06776	0.896174	1.06695	1.06695	1.00745	1.0372	no	no	n/a	n/a	n/a	n/a	n/a	n/a	n/a	n/a	n/a
11100702_D09	Extract	2014-11-19	1.23674	1.13076	1.18375	2014-11-20	1.38204	1.29541	1.00613	1.00613	0.908896	0.957515	no	no	n/a	n/a	n/a	n/a	n/a	n/a	n/a	n/a	n/a
11010341_D05	Extract	2014-11-25	1.20646	1.16002	1.18324	2014-12-05	1.20851	1.16484	1.0531	1.0531	0.991039	1.02207	no	no	n/a	n/a	n/a	n/a	n/a	n/a	n/a	n/a	n/a
11020708_F05	Extract	2014-11-24	1.24007	1.12512	1.18259	2014-12-05	0.783817	1.1327	0.566094	0.566094	0.873456	0.719775	no	no	n/a	n/a	n/a	n/a	n/a	n/a	n/a	n/a	n/a
11090302_C11	Extract	2014-11-19	1.18661	1.17696	1.18179	2014-12-05	1.00199	1.07516	0.924474	0.924474	0.940585	0.93253	no	no	n/a	n/a	n/a	n/a	n/a	n/a	n/a	n/a	n/a
11100302_F08	Extract	2014-11-19	1.25251	1.11055	1.18153	2014-11-21	1.08143	1.23873	1.12846	1.12846	1.08588	1.10717	no	no	n/a	n/a	n/a	n/a	n/a	n/a	n/a	n/a	n/a
11090304_D04	Extract	2014-11-19	1.22213	1.13924	1.18068	2014-12-05	0.858932	1.14095	0.820606	0.820606	0.900865	0.860735	no	no	n/a	n/a	n/a	n/a	n/a	n/a	n/a	n/a	n/a
11100701_G06	Extract	2014-11-19	1.21246	1.14881	1.18063	2014-12-04	0.822657	0.969431	1.24149	1.24149	0.8218	1.03165	no	no	n/a	n/a	n/a	n/a	n/a	n/a	n/a	n/a	n/a
11040303_C02	Extract	2014-11-19	1.13178	1.22793	1.17985	2014-12-05	1.14248	1.12707	0.843476	0.843476	0.892288	0.867882	no	no	n/a	n/a	n/a	n/a	n/a	n/a	n/a	n/a	n/a
11100304_H04	Extract	2014-11-19	1.2336	1.1259	1.17975	2014-12-04	1.10853	1.12138	1.0788	1.0788	1.02545	1.05212	no	no	n/a	n/a	n/a	n/a	n/a	n/a	n/a	n/a	n/a
11100102_G08	Extract	2014-11-19	1.25651	1.1	1.17825	2014-11-21	1.11164	1.24334	1.12347	1.12347	1.25442	1.18895	no	no	n/a	n/a	n/a	n/a	n/a	n/a	n/a	n/a	n/a
11100806_D05	Extract	2014-11-19	1.21319	1.14106	1.17712	2014-11-20	1.32966	1.31738	1.16227	1.16227	1.10634	1.13431	no	no	n/a	n/a	n/a	n/a	n/a	n/a	n/a	n/a	n/a
11090204_H06	Extract	2014-11-19	1.19633	1.15746	1.1769	2014-12-04	1.01179	0.9857	0.969408	0.969408	1.11194	1.04067	no	no	n/a	n/a	n/a	n/a	n/a	n/a	n/a	n/a	n/a
11100807_C06	Extract	2014-11-19	1.20681	1.14572	1.17626	2014-12-04	1.05027	1.20812	0.998768	0.998768	0.896341	0.947555	no	no	n/a	n/a	n/a	n/a	n/a	n/a	n/a	n/a	n/a
11010535_C10	Extract	2014-11-25	1.1731	1.17819	1.17565	2014-12-05	1.11629	1.09464	0.968568	0.968568	1.00081	0.984688	no	no	n/a	n/a	n/a	n/a	n/a	n/a	n/a	n/a	n/a
11001218_D06	Extract	2014-11-25	1.19513	1.15596	1.17554	2014-12-05	1.09908	1.15858	1.1003	1.1003	1.11625	1.10827	no	no	n/a	n/a	n/a	n/a	n/a	n/a	n/a	n/a	n/a
11100702_F02	Extract	2014-11-19	1.18872	1.1606	1.17466	2014-11-20	1.09389	1.04095	1.06598	1.06598	1.10695	1.08647	no	no	n/a	n/a	n/a	n/a	n/a	n/a	n/a	n/a	n/a
11090204_E03	Extract	2014-11-19	1.15784	1.19093	1.17439	2014-12-04	1.06385	1.00618	0.931195	0.931195	1.02628	0.978738	no	no	n/a	n/a	n/a	n/a	n/a	n/a	n/a	n/a	n/a
11010353_G02	Extract	2014-11-25	1.19249	1.15531	1.1739	2014-12-05	1.14665	1.02807	1.24229	1.24229	1.05631	1.1493	no	no	n/a	n/a	n/a	n/a	n/a	n/a	n/a	n/a	n/a
11010341_D08	Extract	2014-11-25	1.1369	1.20852	1.17271	2014-12-05	1.04884	1.07341	1.0489	1.0489	1.05153	1.05022	no	no	n/a	n/a	n/a	n/a	n/a	n/a	n/a	n/a	n/a
11090302_G04	Extract	2014-11-19	1.1986	1.14682	1.17271	2014-12-05	1.08143	1.10686	0.957154	0.957154	0.969897	0.963525	no	no	n/a	n/a	n/a	n/a	n/a	n/a	n/a	n/a	n/a
11001218_E09	Extract	2014-11-25	1.19406	1.15028	1.17217	2014-12-05	1.04765	1.06553	0.978541	0.978541	1.16093	1.06973	no	no	n/a	n/a	n/a	n/a	n/a	n/a	n/a	n/a	n/a
11100302_B10	Extract	2014-11-19	1.30522	1.03784	1.17153	2014-11-21	1.13939	1.13017	0.696058	0.696058	1.19553	0.945794	no	no	n/a	n/a	n/a	n/a	n/a	n/a	n/a	n/a	n/a
11100701_E03	Extract	2014-11-19	1.28299	1.05972	1.17136	2014-12-04	1.15626	1.15428	0.971705	0.971705	1.22039	1.09605	no	no	n/a	n/a	n/a	n/a	n/a	n/a	n/a	n/a	n/a
11100102_H04	Extract	2014-11-19	1.14098	1.19954	1.17026	2014-11-21	1.32732	1.48738	1.35003	1.35003	1.39991	1.37497	no	no	n/a	n/a	n/a	n/a	n/a	n/a	n/a	n/a	n/a
11040302_F09	Extract	2014-11-19	1.13453	1.20418	1.16936	2014-12-05	1.04508	1.11783	0.821463	0.821463	0.820727	0.821095	no	no	n/a	n/a	n/a	n/a	n/a	n/a	n/a	n/a	n/a
11090205_D07	Extract	2014-11-19	1.22612	1.11256	1.16934	2014-12-04	1.03646	1.06912	0.96033	0.96033	0.943715	0.952023	no	no	n/a	n/a	n/a	n/a	n/a	n/a	n/a	n/a	n/a
11040209_F10	Extract	2014-11-19	1.20311	1.1346	1.16885	2014-12-05	0.933015	1.15645	0.879509	0.879509	0.919252	0.899381	no	no	n/a	n/a	n/a	n/a	n/a	n/a	n/a	n/a	n/a
11010353_G09	Extract	2014-11-25	1.20331	1.13361	1.16846	2014-12-05	1.03714	1.01451	1.00754	1.00754	0.950256	0.9789	no	no	n/a	n/a	n/a	n/a	n/a	n/a	n/a	n/a	n/a
11100302_D08	Extract	2014-11-19	1.2678	1.06755	1.16767	2014-11-21	1.19309	1.16605	0.689243	0.689243	1.15145	0.920348	no	no	n/a	n/a	n/a	n/a	n/a	n/a	n/a	n/a	n/a
11100804_E04	Extract	2014-11-19	1.14606	1.18864	1.16735	2014-11-20	1.24177	1.16704	1.06455	1.06455	1.00545	1.035	no	no	n/a	n/a	n/a	n/a	n/a	n/a	n/a	n/a	n/a
11010353_C05	Extract	2014-11-25	1.21135	1.1228	1.16707	2014-12-05	1.11915	1.09531	1.02797	1.02797	1.03721	1.03259	no	no	n/a	n/a	n/a	n/a	n/a	n/a	n/a	n/a	n/a
11040208_A05	Extract	2014-11-19	1.21451	1.118	1.16625	2014-12-05	1.24547	1.12295	1.01348	1.01348	0.970221	0.991851	no	no	n/a	n/a	n/a	n/a	n/a	n/a	n/a	n/a	n/a
11100804_D07	Extract	2014-11-19	1.20116	1.12976	1.16546	2014-11-20	1.31233	1.43907	1.08775	1.08775	1.10757	1.09766	no	no	n/a	n/a	n/a	n/a	n/a	n/a	n/a	n/a	n/a
11040303_B07	Extract	2014-11-19	1.12942	1.20114	1.16528	2014-12-05	1.12911	1.0989	0.831922	0.831922	0.909862	0.870892	no	no	n/a	n/a	n/a	n/a	n/a	n/a	n/a	n/a	n/a
11100102_F02	Extract	2014-11-19	1.25119	1.07935	1.16527	2014-11-21	0.792757	1.22925	0.771567	0.771567	0.931149	0.851358	no	no	n/a	n/a	n/a	n/a	n/a	n/a	n/a	n/a	n/a
11100206_G04	Extract	2014-11-19	1.1589	1.17085	1.16487	2014-11-21	1.27607	1.49048	1.67721	1.67721	1.31054	1.49387	no	no	n/a	n/a	n/a	n/a	n/a	n/a	n/a	n/a	n/a
11090501_E09	Extract	2014-11-19	1.15932	1.16913	1.16422	2014-12-05	0.899796	1.02788	0.923353	0.923353	0.700445	0.811899	no	no	n/a	n/a	n/a	n/a	n/a	n/a	n/a	n/a	n/a
11100804_G07	Extract	2014-11-19	1.11851	1.20961	1.16406	2014-11-20	1.20253	1.27588	1.03275	1.03275	1.07402	1.05338	no	no	n/a	n/a	n/a	n/a	n/a	n/a	n/a	n/a	n/a
11020711_D09	Extract	2014-11-24	1.21866	1.10768	1.16317	2014-12-05	0.863395	1.06187	0.652911	0.652911	0.809876	0.731393	no	no	n/a	n/a	n/a	n/a	n/a	n/a	n/a	n/a	n/a
11100805_G05	Extract	2014-11-19	1.21451	1.11162	1.16306	2014-11-20	1.28016	1.21553	1.01386	1.01386	1.06664	1.04025	no	no	n/a	n/a	n/a	n/a	n/a	n/a	n/a	n/a	n/a
11090204_A06	Extract	2014-11-19	1.17236	1.15086	1.16161	2014-12-04	0.99883	1.02664	1.09914	1.09914	1.08294	1.09104	no	no	n/a	n/a	n/a	n/a	n/a	n/a	n/a	n/a	n/a
11090201_F05	Extract	2014-11-19	1.08235	1.23937	1.16086	2014-12-04	0.968189	1.08167	1.00169	1.00169	0.974815	0.988254	no	no	n/a	n/a	n/a	n/a	n/a	n/a	n/a	n/a	n/a
11040209_H08	Extract	2014-11-19	1.11408	1.20685	1.16047	2014-12-05	0.945522	1.00185	0.883068	0.883068	0.944435	0.913752	no	no	n/a	n/a	n/a	n/a	n/a	n/a	n/a	n/a	n/a
11090301_E07	Extract	2014-11-19	1.10893	1.21124	1.16009	2014-12-05	1.0165	1.01948	0.852136	0.852136	0.964028	0.908082	no	no	n/a	n/a	n/a	n/a	n/a	n/a	n/a	n/a	n/a
11020901_B02	Extract	2014-11-24	1.1822	1.13732	1.15976	2014-12-05	0.963997	1.11577	0.789388	0.789388	0.938619	0.864003	no	no	n/a	n/a	n/a	n/a	n/a	n/a	n/a	n/a	n/a
11100903_E04	Extract	2014-11-19	1.07469	1.24306	1.15888	2014-12-04	1.0548	1.04713	0.973365	0.973365	0.900275	0.93682	no	no	n/a	n/a	n/a	n/a	n/a	n/a	n/a	n/a	n/a
11090206_B04	Extract	2014-11-19	1.29418	1.02259	1.15838	2014-12-04	1.02174	0.954764	1.09977	1.09977	1.02662	1.0632	no	no	n/a	n/a	n/a	n/a	n/a	n/a	n/a	n/a	n/a
11090304_E05	Extract	2014-11-19	1.15753	1.1581	1.15782	2014-12-05	0.953258	0.982054	0.820045	0.820045	0.885268	0.852657	no	no	n/a	n/a	n/a	n/a	n/a	n/a	n/a	n/a	n/a
11100807_F11	Extract	2014-11-19	1.18156	1.1338	1.15768	2014-12-04	0.974541	1.04713	0.934746	0.934746	0.802474	0.86861	no	no	n/a	n/a	n/a	n/a	n/a	n/a	n/a	n/a	n/a
11090206_H03	Extract	2014-11-19	1.18568	1.12886	1.15727	2014-12-04	1.08753	1.11904	1.09007	1.09007	1.14063	1.11535	no	no	n/a	n/a	n/a	n/a	n/a	n/a	n/a	n/a	n/a
11020708_F03	Extract	2014-11-24	1.20753	1.10684	1.15718	2014-12-05	0.635946	0.961265	0.380264	0.380264	0.570563	0.475413	no	no	n/a	n/a	n/a	n/a	n/a	n/a	n/a	n/a	n/a
11010341_E04	Extract	2014-11-25	1.18219	1.13159	1.15689	2014-12-05	1.08802	1.12121	1.16708	1.16708	1.07321	1.12014	no	no	n/a	n/a	n/a	n/a	n/a	n/a	n/a	n/a	n/a
11100806_C10	Extract	2014-11-19	1.1434	1.16826	1.15583	2014-11-20	1.24001	1.32045	1.14449	1.14449	1.22019	1.18234	no	no	n/a	n/a	n/a	n/a	n/a	n/a	n/a	n/a	n/a
11020708_D09	Extract	2014-11-24	1.1929	1.1165	1.1547	2014-12-05	0.795188	1.04743	0.798653	0.798653	0.855768	0.827211	no	no	n/a	n/a	n/a	n/a	n/a	n/a	n/a	n/a	n/a
11010353_D10	Extract	2014-11-25	1.15678	1.14898	1.15288	2014-12-05	1.03714	0.966294	1.08387	1.08387	0.912701	0.998284	no	no	n/a	n/a	n/a	n/a	n/a	n/a	n/a	n/a	n/a
11010353_E02	Extract	2014-11-25	1.16176	1.14386	1.15281	2014-12-05	1.25	1.15556	1.15297	1.15297	1.15517	1.15407	no	no	n/a	n/a	n/a	n/a	n/a	n/a	n/a	n/a	n/a
11090301_C05	Extract	2014-11-19	1.20814	1.09555	1.15184	2014-12-05	0.959687	1.10278	0.930976	0.930976	0.935073	0.933025	no	no	n/a	n/a	n/a	n/a	n/a	n/a	n/a	n/a	n/a
11090201_D08	Extract	2014-11-19	1.24984	1.05383	1.15184	2014-12-04	1.03123	1.05452	1.03772	1.03772	1.0387	1.03821	no	no	n/a	n/a	n/a	n/a	n/a	n/a	n/a	n/a	n/a
11010341_H10	Extract	2014-11-25	1.04986	1.25379	1.15182	2014-12-05	1.02279	0.906467	0.896482	0.896482	0.944138	0.92031	no	no	n/a	n/a	n/a	n/a	n/a	n/a	n/a	n/a	n/a
11040208_D03	Extract	2014-11-19	1.07893	1.22453	1.15173	2014-12-05	0.898261	1.14308	0.958172	0.958172	0.956875	0.957524	no	no	n/a	n/a	n/a	n/a	n/a	n/a	n/a	n/a	n/a
11090301_D06	Extract	2014-11-19	1.16996	1.1328	1.15138	2014-12-05	0.846098	1.07757	0.976576	0.976576	0.97314	0.974858	no	no	n/a	n/a	n/a	n/a	n/a	n/a	n/a	n/a	n/a
11100302_F09	Extract	2014-11-19	1.19209	1.11034	1.15121	2014-11-21	1.30406	1.28631	1.09668	1.09668	1.23545	1.16607	no	no	n/a	n/a	n/a	n/a	n/a	n/a	n/a	n/a	n/a
11010341_C02	Extract	2014-11-25	1.12964	1.17222	1.15093	2014-12-05	1.16506	1.13838	1.04863	1.04863	1.00009	1.02436	no	no	n/a	n/a	n/a	n/a	n/a	n/a	n/a	n/a	n/a
11100205_B05	Extract	2014-11-19	1.2253	1.07556	1.15043	2014-11-21	1.26132	1.16144	0.909244	0.909244	0.99359	0.951417	no	no	n/a	n/a	n/a	n/a	n/a	n/a	n/a	n/a	n/a
11010216_H06	Extract	2014-11-25	1.23262	1.06766	1.15014	2014-12-05	0.988994	1.02632	1.05282	1.05282	1.05024	1.05153	no	no	n/a	n/a	n/a	n/a	n/a	n/a	n/a	n/a	n/a
11100804_C05	Extract	2014-11-19	1.20917	1.08986	1.14952	2014-11-20	1.19166	1.03897	0.920786	0.920786	1.02574	0.973264	no	no	n/a	n/a	n/a	n/a	n/a	n/a	n/a	n/a	n/a
11010341_G08	Extract	2014-11-25	1.14419	1.15327	1.14873	2014-12-05	0.965065	0.963006	0.993347	0.993347	0.922459	0.957903	no	no	n/a	n/a	n/a	n/a	n/a	n/a	n/a	n/a	n/a
11010402_D04	Extract	2014-11-25	1.22685	1.0704	1.14863	2014-12-05	1.06776	0.92876	0.957019	0.957019	0.984618	0.970819	no	no	n/a	n/a	n/a	n/a	n/a	n/a	n/a	n/a	n/a
11010353_A11	Extract	2014-11-25	1.23461	1.06195	1.14828	2014-12-05	1.09578	1.04437	1.06695	1.06695	1.07623	1.07159	no	no	n/a	n/a	n/a	n/a	n/a	n/a	n/a	n/a	n/a
11090501_E07	Extract	2014-11-19	1.24477	1.0514	1.14809	2014-12-05	0.902396	1.03892	0.910404	0.910404	0.935721	0.923063	no	no	n/a	n/a	n/a	n/a	n/a	n/a	n/a	n/a	n/a
11001218_C05	Extract	2014-11-25	1.24098	1.05062	1.1458	2014-12-05	1.20804	1.07689	1.10057	1.10057	1.04603	1.0733	no	no	n/a	n/a	n/a	n/a	n/a	n/a	n/a	n/a	n/a
11100903_F07	Extract	2014-11-19	1.0979	1.19255	1.14522	2014-12-04	1.03123	1.11904	0.913318	0.913318	0.864114	0.888716	no	no	n/a	n/a	n/a	n/a	n/a	n/a	n/a	n/a	n/a
11040208_G09	Extract	2014-11-19	1.05595	1.23042	1.14319	2014-12-05	0.941344	1.07707	0.986511	0.986511	0.975958	0.981235	no	no	n/a	n/a	n/a	n/a	n/a	n/a	n/a	n/a	n/a
11100906_G02	Extract	2014-11-19	1.24185	1.04302	1.14243	2014-12-04	1.01354	1.03137	0.964625	0.964625	1.02156	0.993092	no	no	n/a	n/a	n/a	n/a	n/a	n/a	n/a	n/a	n/a
11010353_H05	Extract	2014-11-25	1.18059	1.10291	1.14175	2014-12-05	0.949991	0.85954	1.02473	1.02473	0.93004	0.977387	no	no	n/a	n/a	n/a	n/a	n/a	n/a	n/a	n/a	n/a
11100806_D08	Extract	2014-11-19	1.25675	1.02519	1.14097	2014-11-20	1.50599	1.36591	1.16024	1.16024	1.07803	1.11914	no	no	n/a	n/a	n/a	n/a	n/a	n/a	n/a	n/a	n/a
11040302_B05	Extract	2014-11-19	1.1532	1.12763	1.14041	2014-12-05	1.02839	1.08072	1.04239	1.04239	0.933202	0.987798	no	no	n/a	n/a	n/a	n/a	n/a	n/a	n/a	n/a	n/a
11001218_C07	Extract	2014-11-25	1.097	1.18332	1.14016	2014-12-05	1.15214	1.1045	1.12907	1.12907	1.09328	1.11118	no	no	n/a	n/a	n/a	n/a	n/a	n/a	n/a	n/a	n/a
11040303_B03	Extract	2014-11-19	1.10251	1.17722	1.13987	2014-12-05	1.20983	1.27863	1.01734	1.01734	0.937762	0.977551	no	no	n/a	n/a	n/a	n/a	n/a	n/a	n/a	n/a	n/a
11090501_B03	Extract	2014-11-19	1.21635	1.06337	1.13986	2014-12-05	1.03908	1.12943	0.964749	0.964749	0.910008	0.937379	no	no	n/a	n/a	n/a	n/a	n/a	n/a	n/a	n/a	n/a
11020708_C02	Extract	2014-11-24	1.20469	1.07469	1.13969	2014-12-05	1.11415	1.06725	0.957845	0.957845	1.00919	0.983519	no	no	n/a	n/a	n/a	n/a	n/a	n/a	n/a	n/a	n/a
11090501_C04	Extract	2014-11-19	1.22614	1.05211	1.13912	2014-12-05	0.984881	1.14935	0.965029	0.965029	1.01873	0.991879	no	no	n/a	n/a	n/a	n/a	n/a	n/a	n/a	n/a	n/a
11100804_D09	Extract	2014-11-19	1.14829	1.12896	1.13863	2014-11-20	1.09189	1.24207	1.04822	1.04822	0.976548	1.01239	no	no	n/a	n/a	n/a	n/a	n/a	n/a	n/a	n/a	n/a
11001218_E05	Extract	2014-11-25	1.20429	1.07254	1.13842	2014-12-05	1.1714	1.0472	1.04388	1.04388	1.29435	1.16911	no	no	n/a	n/a	n/a	n/a	n/a	n/a	n/a	n/a	n/a
11090501_A02	Extract	2014-11-19	1.13068	1.14476	1.13772	2014-12-05	0.938061	1.09005	0.996588	0.996588	1.05556	1.02608	no	no	n/a	n/a	n/a	n/a	n/a	n/a	n/a	n/a	n/a
11010341_C07	Extract	2014-11-25	1.11238	1.16137	1.13687	2014-12-05	1.0296	1.10542	0.956484	0.956484	0.974514	0.965499	no	no	n/a	n/a	n/a	n/a	n/a	n/a	n/a	n/a	n/a
11090304_C05	Extract	2014-11-19	1.20349	1.07004	1.13676	2014-12-05	0.796938	1.12774	0.965309	0.965309	0.9484	0.956855	no	no	n/a	n/a	n/a	n/a	n/a	n/a	n/a	n/a	n/a
11040303_F05	Extract	2014-11-19	1.05398	1.2147	1.13434	2014-12-05	0.887691	1.04309	0.882794	0.882794	0.914421	0.898608	no	no	n/a	n/a	n/a	n/a	n/a	n/a	n/a	n/a	n/a
11010341_C08	Extract	2014-11-25	1.16061	1.10585	1.13323	2014-12-05	1.04718	1.03699	1.00563	1.00563	0.984564	0.995095	no	no	n/a	n/a	n/a	n/a	n/a	n/a	n/a	n/a	n/a
11020901_D02	Extract	2014-11-24	1.26257	1.00389	1.13323	2014-12-05	0.938624	1.00858	0.906034	0.906034	0.934765	0.920399	no	no	n/a	n/a	n/a	n/a	n/a	n/a	n/a	n/a	n/a
11090301_E03	Extract	2014-11-19	1.32629	0.938351	1.13232	2014-12-05	1.02078	1.04467	0.914356	0.914356	0.99694	0.955648	no	no	n/a	n/a	n/a	n/a	n/a	n/a	n/a	n/a	n/a
11020709_D04	Extract	2014-11-24	1.09662	1.16676	1.13169	2014-12-05	0.931188	1.06996	0.876583	0.876583	0.831418	0.854	no	no	n/a	n/a	n/a	n/a	n/a	n/a	n/a	n/a	n/a
11040303_D05	Extract	2014-11-19	1.1302	1.13174	1.13097	2014-12-05	0.968876	1.155	0.728835	0.728835	0.855904	0.792369	no	no	n/a	n/a	n/a	n/a	n/a	n/a	n/a	n/a	n/a
11010353_D02	Extract	2014-11-25	1.11162	1.14958	1.1306	2014-12-05	1.19469	1.09621	1.07205	1.07205	0.985194	1.02862	no	no	n/a	n/a	n/a	n/a	n/a	n/a	n/a	n/a	n/a
11100807_B10	Extract	2014-11-19	1.13839	1.12274	1.13057	2014-12-04	0.962982	1.00365	0.936852	0.936852	0.9322	0.934526	no	no	n/a	n/a	n/a	n/a	n/a	n/a	n/a	n/a	n/a
11010353_F09	Extract	2014-11-25	1.17145	1.08967	1.13056	2014-12-05	0.905128	0.952733	0.872141	0.872141	0.792301	0.832221	no	no	n/a	n/a	n/a	n/a	n/a	n/a	n/a	n/a	n/a
11010535_E05	Extract	2014-11-25	1.16619	1.09449	1.13034	2014-12-05	0.912661	1.13856	0.935258	0.935258	0.848001	0.89163	no	no	n/a	n/a	n/a	n/a	n/a	n/a	n/a	n/a	n/a
11020901_D06	Extract	2014-11-24	1.24705	1.01355	1.1303	2014-12-05	0.84524	0.980511	0.838788	0.838788	0.893722	0.866255	no	no	n/a	n/a	n/a	n/a	n/a	n/a	n/a	n/a	n/a
11090501_D07	Extract	2014-11-19	1.23501	1.02452	1.12977	2014-12-05	0.986063	1.03964	0.882265	0.882265	0.845223	0.863744	no	no	n/a	n/a	n/a	n/a	n/a	n/a	n/a	n/a	n/a
11090204_E04	Extract	2014-11-19	1.02648	1.23299	1.12974	2014-12-04	1.09477	1.16819	1.01673	1.01673	1.11056	1.06365	no	no	n/a	n/a	n/a	n/a	n/a	n/a	n/a	n/a	n/a
11001218_B06	Extract	2014-11-25	1.23128	1.02813	1.12971	2014-12-05	1.06971	1.08454	0.991375	0.991375	0.998158	0.994766	no	no	n/a	n/a	n/a	n/a	n/a	n/a	n/a	n/a	n/a
11090205_D03	Extract	2014-11-19	1.21547	1.04393	1.1297	2014-12-04	0.980896	1.28728	0.833777	0.833777	1.01486	0.924318	no	no	n/a	n/a	n/a	n/a	n/a	n/a	n/a	n/a	n/a
11040209_F03	Extract	2014-11-19	1.13158	1.12656	1.12907	2014-12-05	0.993364	1.15305	0.739267	0.739267	0.823776	0.781522	no	no	n/a	n/a	n/a	n/a	n/a	n/a	n/a	n/a	n/a
11010341_C05	Extract	2014-11-25	1.14121	1.11532	1.12827	2014-12-05	1.08802	1.08198	0.909871	0.909871	1.00592	0.957896	no	no	n/a	n/a	n/a	n/a	n/a	n/a	n/a	n/a	n/a
11100702_H02	Extract	2014-11-19	1.20207	1.05298	1.12753	2014-11-20	1.18501	1.16286	1.04307	1.04307	1.10141	1.07224	no	no	n/a	n/a	n/a	n/a	n/a	n/a	n/a	n/a	n/a
11090301_H09	Extract	2014-11-19	0.978534	1.27636	1.12744	2014-12-05	0.928536	0.971487	0.842018	0.842018	0.847493	0.844756	no	no	n/a	n/a	n/a	n/a	n/a	n/a	n/a	n/a	n/a
11010119_F11	Extract	2014-11-25	1.15038	1.1045	1.12744	2014-12-05	1.12606	1.06806	1.07096	1.07096	1.08842	1.07969	no	no	n/a	n/a	n/a	n/a	n/a	n/a	n/a	n/a	n/a
11090302_B02	Extract	2014-11-19	1.16974	1.08312	1.12643	2014-12-05	1.10591	1.08501	1.07265	1.07265	1.01581	1.04423	no	no	n/a	n/a	n/a	n/a	n/a	n/a	n/a	n/a	n/a
11010535_C07	Extract	2014-11-25	1.16451	1.08724	1.12588	2014-12-05	0.948701	1.00477	0.87027	0.87027	0.854643	0.862457	no	no	n/a	n/a	n/a	n/a	n/a	n/a	n/a	n/a	n/a
11001218_G05	Extract	2014-11-25	1.16359	1.08662	1.1251	2014-12-05	1.08028	1.07712	1.09946	1.09946	1.02048	1.05997	no	no	n/a	n/a	n/a	n/a	n/a	n/a	n/a	n/a	n/a
11040303_D09	Extract	2014-11-19	1.07912	1.17045	1.12479	2014-12-05	0.854625	1.05134	0.829184	0.829184	0.921396	0.87529	no	no	n/a	n/a	n/a	n/a	n/a	n/a	n/a	n/a	n/a
11100302_A02	Extract	2014-11-19	1.30986	0.939475	1.12467	2014-11-21	1.09017	1.29249	1.07856	1.07856	1.06022	1.06939	no	no	n/a	n/a	n/a	n/a	n/a	n/a	n/a	n/a	n/a
11090301_E08	Extract	2014-11-19	1.14555	1.10199	1.12377	2014-12-05	0.978689	1.04949	0.87296	0.87296	0.906733	0.889847	no	no	n/a	n/a	n/a	n/a	n/a	n/a	n/a	n/a	n/a
11090206_E06	Extract	2014-11-19	1.13897	1.10773	1.12335	2014-12-04	0.872326	0.94965	0.97599	0.97599	1.05597	1.01598	no	no	n/a	n/a	n/a	n/a	n/a	n/a	n/a	n/a	n/a
11040209_G08	Extract	2014-11-19	1.07481	1.17063	1.12272	2014-12-05	0.889656	1.01326	0.898757	0.898757	0.842557	0.870657	no	no	n/a	n/a	n/a	n/a	n/a	n/a	n/a	n/a	n/a
11040303_C04	Extract	2014-11-19	1.07973	1.16545	1.12259	2014-12-05	1.0999	1.10353	0.88775	0.88775	0.801341	0.844546	no	no	n/a	n/a	n/a	n/a	n/a	n/a	n/a	n/a	n/a
11090301_F07	Extract	2014-11-19	1.19349	1.05117	1.12233	2014-12-05	0.908352	1.05765	0.87523	0.87523	0.876805	0.876018	no	no	n/a	n/a	n/a	n/a	n/a	n/a	n/a	n/a	n/a
11040303_C10	Extract	2014-11-19	1.07304	1.17098	1.12201	2014-12-05	0.945799	1.0676	0.931477	0.931477	0.992354	0.961915	no	no	n/a	n/a	n/a	n/a	n/a	n/a	n/a	n/a	n/a
11090302_F05	Extract	2014-11-19	1.21569	1.02683	1.12126	2014-12-05	0.892422	0.993338	0.790224	0.790224	0.832869	0.811547	no	no	n/a	n/a	n/a	n/a	n/a	n/a	n/a	n/a	n/a
11020708_D03	Extract	2014-11-24	1.19333	1.04843	1.12088	2014-12-05	0.817257	1.15254	0.816712	0.816712	0.829095	0.822904	no	no	n/a	n/a	n/a	n/a	n/a	n/a	n/a	n/a	Did not follow up.
11010353_C03	Extract	2014-11-25	1.16619	1.07519	1.12069	2014-12-05	1.0649	1.02377	0.946272	0.946272	0.876296	0.911284	no	no	n/a	n/a	n/a	n/a	n/a	n/a	n/a	n/a	n/a
11090206_E11	Extract	2014-11-19	1.19198	1.04832	1.12015	2014-12-04	0.94976	1.01129	0.996047	0.996047	0.975847	0.985947	no	no	n/a	n/a	n/a	n/a	n/a	n/a	n/a	n/a	n/a
11090301_E04	Extract	2014-11-19	1.1196	1.11854	1.11907	2014-12-05	0.943757	1.05741	0.971503	0.971503	0.962083	0.966793	no	no	n/a	n/a	n/a	n/a	n/a	n/a	n/a	n/a	n/a
11010353_D11	Extract	2014-11-25	1.13268	1.105	1.11884	2014-12-05	0.870146	0.939375	0.993296	0.993296	0.938983	0.96614	no	no	n/a	n/a	n/a	n/a	n/a	n/a	n/a	n/a	n/a
11090301_F05	Extract	2014-11-19	1.19216	1.04475	1.11846	2014-12-05	0.95659	1.1227	0.894373	0.894373	0.878426	0.8864	no	no	n/a	n/a	n/a	n/a	n/a	n/a	n/a	n/a	n/a
11100806_G03	Extract	2014-11-19	1.12385	1.11282	1.11834	2014-11-20	1.18301	1.21135	1.16654	1.16654	1.08387	1.12521	no	no	n/a	n/a	n/a	n/a	n/a	n/a	n/a	n/a	n/a
11100303_C04	Extract	2014-11-19	1.23052	1.00569	1.1181	2014-12-04	0.985241	1.1992	1.22076	1.22076	1.03048	1.12562	no	no	n/a	n/a	n/a	n/a	n/a	n/a	n/a	n/a	n/a
11001218_C10	Extract	2014-11-25	1.09298	1.14295	1.11796	2014-12-05	1.08147	1.13954	0.97993	0.97993	0.971293	0.975611	no	no	n/a	n/a	n/a	n/a	n/a	n/a	n/a	n/a	n/a
11020711_D07	Extract	2014-11-24	1.16692	1.06795	1.11744	2014-12-05	0.805668	1.12365	0.838552	0.838552	0.905514	0.872033	no	no	n/a	n/a	n/a	n/a	n/a	n/a	n/a	n/a	n/a
11020708_C09	Extract	2014-11-24	1.26605	0.968611	1.11733	2014-12-05	1.03883	1.17333	0.827159	0.827159	0.92065	0.873904	no	no	n/a	n/a	n/a	n/a	n/a	n/a	n/a	n/a	n/a
11010535_D05	Extract	2014-11-25	1.13712	1.09718	1.11715	2014-12-05	1.04338	1.02015	0.835089	0.835089	0.829827	0.832458	no	no	n/a	n/a	n/a	n/a	n/a	n/a	n/a	n/a	n/a
11010341_F05	Extract	2014-11-25	1.16144	1.07173	1.11659	2014-12-05	1.00917	1.0588	0.854647	0.854647	0.961919	0.908283	no	no	n/a	n/a	n/a	n/a	n/a	n/a	n/a	n/a	n/a
11090301_E11	Extract	2014-11-19	1.07743	1.15465	1.11604	2014-12-05	0.953494	1.0562	0.882545	0.882545	0.974469	0.928507	no	no	n/a	n/a	n/a	n/a	n/a	n/a	n/a	n/a	n/a
11100806_A10	Extract	2014-11-19	1.16539	1.06548	1.11544	2014-11-20	1.14443	1.23726	1.1892	1.1892	1.0116	1.1004	no	no	n/a	n/a	n/a	n/a	n/a	n/a	n/a	n/a	n/a
11090204_E05	Extract	2014-11-19	1.09228	1.13612	1.1142	2014-12-04	0.865861	1.06042	0.908018	0.908018	1.03282	0.970417	no	no	n/a	n/a	n/a	n/a	n/a	n/a	n/a	n/a	n/a
11090301_C02	Extract	2014-11-19	1.07212	1.15625	1.11419	2014-12-05	0.912394	0.941501	0.867046	0.867046	0.931798	0.899422	no	no	n/a	n/a	n/a	n/a	n/a	n/a	n/a	n/a	n/a
11090301_B10	Extract	2014-11-19	1.06879	1.15924	1.11402	2014-12-05	0.925464	0.997656	0.879434	0.879434	0.841008	0.860221	no	no	n/a	n/a	n/a	n/a	n/a	n/a	n/a	n/a	n/a
11010119_E02	Extract	2014-11-25	1.18867	1.03734	1.11301	2014-12-05	1.05658	1.17365	1.03521	1.03521	1.03018	1.03269	no	no	n/a	n/a	n/a	n/a	n/a	n/a	n/a	n/a	n/a
11010353_E05	Extract	2014-11-25	1.10664	1.11828	1.11246	2014-12-05	1.09162	0.955207	0.919673	0.919673	0.911838	0.915756	no	no	n/a	n/a	n/a	n/a	n/a	n/a	n/a	n/a	n/a
11010353_E04	Extract	2014-11-25	1.154	1.06947	1.11173	2014-12-05	0.996686	0.996631	1.05457	1.05457	0.903154	0.978861	no	no	n/a	n/a	n/a	n/a	n/a	n/a	n/a	n/a	n/a
11040208_E09	Extract	2014-11-19	1.08012	1.14298	1.11155	2014-12-05	0.990293	1.02563	0.872335	0.872335	0.986285	0.92931	no	no	n/a	n/a	n/a	n/a	n/a	n/a	n/a	n/a	n/a
11040303_B10	Extract	2014-11-19	1.06067	1.16207	1.11137	2014-12-05	1.06038	1.08556	0.928465	0.928465	1.03816	0.983312	no	no	n/a	n/a	n/a	n/a	n/a	n/a	n/a	n/a	n/a
11100205_F03	Extract	2014-11-19	1.11486	1.10718	1.11102	2014-11-21	0.83912	1.24599	0.817181	0.817181	1.05215	0.934664	no	no	n/a	n/a	n/a	n/a	n/a	n/a	n/a	n/a	n/a
11001218_C09	Extract	2014-11-25	1.11533	1.10585	1.11059	2014-12-05	1.12606	1.03582	0.982458	0.982458	1.0897	1.03608	no	no	n/a	n/a	n/a	n/a	n/a	n/a	n/a	n/a	n/a
11090201_B06	Extract	2014-11-19	1.15784	1.06196	1.1099	2014-12-04	1.021	1.13184	1.0653	1.0653	1.02212	1.04371	no	no	n/a	n/a	n/a	n/a	n/a	n/a	n/a	n/a	n/a
11090205_B06	Extract	2014-11-19	1.17164	1.04745	1.10954	2014-12-04	1.11721	1.08551	1.19572	1.19572	1.06773	1.13173	no	no	n/a	n/a	n/a	n/a	n/a	n/a	n/a	n/a	n/a
11020901_F03	Extract	2014-11-24	1.11758	1.09843	1.10801	2014-12-05	0.891377	0.839623	0.734078	0.734078	0.787823	0.760951	no	no	n/a	n/a	n/a	n/a	n/a	n/a	n/a	n/a	n/a
11020708_D12	Extract	2014-11-24	1.1584	1.0564	1.1074	2014-12-05	0.485814	0.476623	0.633931	0.633931	0.599252	0.616591	no	no	n/a	n/a	n/a	n/a	n/a	n/a	n/a	n/a	n/a
11090301_A05	Extract	2014-11-19	1.12004	1.09255	1.1063	2014-12-05	1.139	1.03291	0.943084	0.943084	1.02787	0.985479	no	no	n/a	n/a	n/a	n/a	n/a	n/a	n/a	n/a	n/a
11040302_B11	Extract	2014-11-19	1.03788	1.17438	1.10613	2014-12-05	1.14162	1.05619	0.913597	0.913597	0.954731	0.934164	no	no	n/a	n/a	n/a	n/a	n/a	n/a	n/a	n/a	n/a
11040302_F06	Extract	2014-11-19	1.15986	1.05184	1.10585	2014-12-05	0.921338	1.06347	0.877291	0.877291	0.879848	0.87857	no	no	n/a	n/a	n/a	n/a	n/a	n/a	n/a	n/a	n/a
11010535_E06	Extract	2014-11-25	1.17781	1.03337	1.10559	2014-12-05	1.15496	1.00183	0.910263	0.910263	0.829827	0.870045	no	no	n/a	n/a	n/a	n/a	n/a	n/a	n/a	n/a	n/a
11010341_F04	Extract	2014-11-25	1.14255	1.0682	1.10538	2014-12-05	1.11221	1.08198	1.07543	1.07543	0.912441	0.993938	no	no	n/a	n/a	n/a	n/a	n/a	n/a	n/a	n/a	n/a
11010341_D07	Extract	2014-11-25	1.17141	1.03815	1.10478	2014-12-05	1.13453	1.06622	1.0841	1.0841	1.00235	1.04322	no	no	n/a	n/a	n/a	n/a	n/a	n/a	n/a	n/a	n/a
11090201_C06	Extract	2014-11-19	1.17311	1.03578	1.10444	2014-12-04	0.92759	1.05991	0.993209	0.993209	0.980319	0.986764	no	no	n/a	n/a	n/a	n/a	n/a	n/a	n/a	n/a	n/a
11090204_D06	Extract	2014-11-19	1.10824	1.09805	1.10315	2014-12-04	0.888502	1.03406	0.955932	0.955932	1.00175	0.978842	no	no	n/a	n/a	n/a	n/a	n/a	n/a	n/a	n/a	n/a
11040208_G08	Extract	2014-11-19	1.00569	1.20044	1.10306	2014-12-05	1.05789	0.968617	0.979365	0.979365	0.835582	0.907474	no	no	n/a	n/a	n/a	n/a	n/a	n/a	n/a	n/a	n/a
11010119_F04	Extract	2014-11-25	1.17302	1.03274	1.10288	2014-12-05	0.956855	0.951896	1.05002	1.05002	0.997836	1.02393	no	no	n/a	n/a	n/a	n/a	n/a	n/a	n/a	n/a	n/a
11020709_D06	Extract	2014-11-24	1.12501	1.08037	1.10269	2014-12-05	0.845674	1.10653	0.770408	0.770408	0.964781	0.867594	no	no	n/a	n/a	n/a	n/a	n/a	n/a	n/a	n/a	n/a
11010353_D09	Extract	2014-11-25	1.13018	1.0746	1.10239	2014-12-05	1.00886	0.935529	0.988457	0.988457	0.853781	0.921119	no	no	n/a	n/a	n/a	n/a	n/a	n/a	n/a	n/a	n/a
11090501_D02	Extract	2014-11-19	1.15421	1.05049	1.10235	2014-12-05	0.997715	1.02475	0.938011	0.938011	1.0054	0.971707	no	no	n/a	n/a	n/a	n/a	n/a	n/a	n/a	n/a	n/a
11090206_E02	Extract	2014-11-19	1.09252	1.11169	1.1021	2014-12-04	0.863607	0.947589	1.01202	1.01202	1.03835	1.02519	no	no	n/a	n/a	n/a	n/a	n/a	n/a	n/a	n/a	n/a
11100205_F10	Extract	2014-11-19	1.23037	0.973162	1.10177	2014-11-21	1.09342	1.21185	1.02629	1.02629	1.07168	1.04898	no	no	n/a	n/a	n/a	n/a	n/a	n/a	n/a	n/a	n/a
11090205_E05	Extract	2014-11-19	1.12808	1.07406	1.10107	2014-12-04	0.892737	0.940949	1.05716	1.05716	0.996213	1.02668	no	no	n/a	n/a	n/a	n/a	n/a	n/a	n/a	n/a	n/a
11010341_B04	Extract	2014-11-25	1.03394	1.16409	1.09902	2014-12-05	1.1526	1.12469	1.03774	1.03774	0.94897	0.993354	no	no	n/a	n/a	n/a	n/a	n/a	n/a	n/a	n/a	n/a
11010341_E02	Extract	2014-11-25	1.15091	1.04682	1.09887	2014-12-05	1.23106	1.03049	1.05143	1.05143	1.10008	1.07575	no	no	n/a	n/a	n/a	n/a	n/a	n/a	n/a	n/a	n/a
11010341_E05	Extract	2014-11-25	1.12746	1.06793	1.0977	2014-12-05	1.03874	1.05972	1.15674	1.15674	1.13503	1.14588	no	no	n/a	n/a	n/a	n/a	n/a	n/a	n/a	n/a	n/a
11090206_F02	Extract	2014-11-19	1.09228	1.10266	1.09747	2014-12-04	0.917136	0.962422	1.0954	1.0954	0.983793	1.0396	no	no	n/a	n/a	n/a	n/a	n/a	n/a	n/a	n/a	n/a
11040302_D07	Extract	2014-11-19	1.07657	1.11835	1.09746	2014-12-05	1.03396	0.983907	0.840711	0.840711	0.834677	0.837694	no	no	n/a	n/a	n/a	n/a	n/a	n/a	n/a	n/a	n/a
11020711_D02	Extract	2014-11-24	1.10863	1.08625	1.09744	2014-12-05	0.88679	1.11036	0.820753	0.820753	0.8963	0.858527	no	no	n/a	n/a	n/a	n/a	n/a	n/a	n/a	n/a	n/a
11100302_A08	Extract	2014-11-19	1.03768	1.15587	1.09677	2014-11-21	0.950633	1.21295	1.03261	1.03261	1.2547	1.14366	no	no	n/a	n/a	n/a	n/a	n/a	n/a	n/a	n/a	n/a
11020711_C03	Extract	2014-11-24	1.15708	1.0356	1.09634	2014-12-05	1.33482	1.15888	0.9764	0.9764	1.00585	0.991124	no	no	n/a	n/a	n/a	n/a	n/a	n/a	n/a	n/a	n/a
11040209_F09	Extract	2014-11-19	1.032	1.15992	1.09596	2014-12-05	1.0209	1.00549	0.843203	0.843203	0.855904	0.849553	no	no	n/a	n/a	n/a	n/a	n/a	n/a	n/a	n/a	n/a
11020711_C06	Extract	2014-11-24	1.12893	1.06293	1.09593	2014-12-05	1.05086	1.1454	0.966638	0.966638	1.03946	1.00305	no	no	n/a	n/a	n/a	n/a	n/a	n/a	n/a	n/a	n/a
11010341_D03	Extract	2014-11-25	1.08084	1.11018	1.09551	2014-12-05	1.07699	1.10798	1.01568	1.01568	1.09135	1.05351	no	no	n/a	n/a	n/a	n/a	n/a	n/a	n/a	n/a	n/a
11100206_D10	Extract	2014-11-19	1.51421	0.676736	1.09547	2014-11-21	1.49269	1.33876	1.29086	1.29086	1.30022	1.29554	no	no	n/a	n/a	n/a	n/a	n/a	n/a	n/a	n/a	n/a
11001218_G06	Extract	2014-11-25	1.04876	1.13999	1.09437	2014-12-05	1.11762	1.11912	0.966262	0.966262	0.998158	0.98221	no	no	n/a	n/a	n/a	n/a	n/a	n/a	n/a	n/a	n/a
11090206_A07	Extract	2014-11-19	1.13678	1.04988	1.09333	2014-12-04	1.03745	1.09421	0.983195	0.983195	1.03904	1.01112	no	no	n/a	n/a	n/a	n/a	n/a	n/a	n/a	n/a	n/a
11090206_E09	Extract	2014-11-19	1.09639	1.0899	1.09315	2014-12-04	0.914164	1.0983	1.03052	1.03052	1.0097	1.02011	no	no	n/a	n/a	n/a	n/a	n/a	n/a	n/a	n/a	n/a
11040209_H07	Extract	2014-11-19	1.11683	1.06933	1.09308	2014-12-05	1.06038	1.00477	0.906177	0.906177	0.874081	0.890129	no	no	n/a	n/a	n/a	n/a	n/a	n/a	n/a	n/a	n/a
11090204_H03	Extract	2014-11-19	1.03107	1.1546	1.09284	2014-12-04	0.890756	1.00056	0.951877	0.951877	0.925757	0.938817	no	no	n/a	n/a	n/a	n/a	n/a	n/a	n/a	n/a	n/a
11010341_C04	Extract	2014-11-25	1.08569	1.09963	1.09266	2014-12-05	1.13077	1.07341	1.05785	1.05785	0.923748	0.990799	no	no	n/a	n/a	n/a	n/a	n/a	n/a	n/a	n/a	n/a
11020901_D05	Extract	2014-11-24	1.14267	1.04234	1.0925	2014-12-05	0.808517	0.985495	0.736442	0.736442	1.00097	0.868708	no	no	n/a	n/a	n/a	n/a	n/a	n/a	n/a	n/a	n/a
11001218_C06	Extract	2014-11-25	1.07248	1.11126	1.09187	2014-12-05	1.1822	1.08546	1.04696	1.04696	0.948648	0.997804	no	no	n/a	n/a	n/a	n/a	n/a	n/a	n/a	n/a	n/a
11040208_E03	Extract	2014-11-19	1.09857	1.08466	1.09161	2014-12-05	0.98	1.06444	0.947439	0.947439	0.998121	0.97278	no	no	n/a	n/a	n/a	n/a	n/a	n/a	n/a	n/a	n/a
11010341_B05	Extract	2014-11-25	1.14228	1.04006	1.09117	2014-12-05	1.12958	1.19502	0.972124	0.972124	1.04474	1.00843	no	no	n/a	n/a	n/a	n/a	n/a	n/a	n/a	n/a	n/a
11010341_B08	Extract	2014-11-25	1.10455	1.07741	1.09098	2014-12-05	1.1054	1.06389	1.00254	1.00254	0.997836	1.00019	no	no	n/a	n/a	n/a	n/a	n/a	n/a	n/a	n/a	n/a
11010353_B09	Extract	2014-11-25	1.14956	1.03125	1.0904	2014-12-05	1.07684	0.93328	1.01075	1.01075	0.903442	0.957097	no	no	n/a	n/a	n/a	n/a	n/a	n/a	n/a	n/a	n/a
11100806_F05	Extract	2014-11-19	1.11829	1.06164	1.08997	2014-11-20	1.35118	1.27895	1.05281	1.05281	1.17158	1.11219	no	no	n/a	n/a	n/a	n/a	n/a	n/a	n/a	n/a	n/a
11010535_D02	Extract	2014-11-25	1.10914	1.0701	1.08962	2014-12-05	1.15782	1.15895	0.954052	0.954052	0.919631	0.936841	no	no	n/a	n/a	n/a	n/a	n/a	n/a	n/a	n/a	n/a
11020711_C09	Extract	2014-11-24	1.1285	1.04968	1.08909	2014-12-05	0.93708	1.12289	0.826923	0.826923	0.929124	0.878023	no	no	n/a	n/a	n/a	n/a	n/a	n/a	n/a	n/a	n/a
11100804_H04	Extract	2014-11-19	1.02501	1.15314	1.08908	2014-11-20	1.1757	1.23704	1.18031	1.18031	1.17341	1.17686	no	no	n/a	n/a	n/a	n/a	n/a	n/a	n/a	n/a	n/a
11040303_B05	Extract	2014-11-19	1.1408	1.03705	1.08892	2014-12-05	0.897155	1.07949	0.869323	0.869323	1.01784	0.943581	no	no	n/a	n/a	n/a	n/a	n/a	n/a	n/a	n/a	n/a
11010353_D04	Extract	2014-11-25	1.14956	1.02825	1.08891	2014-12-05	0.903838	1.05162	0.957019	0.957019	0.86419	0.910605	no	no	n/a	n/a	n/a	n/a	n/a	n/a	n/a	n/a	n/a
11010353_D05	Extract	2014-11-25	1.17864	0.99874	1.08869	2014-12-05	1.03897	0.955904	0.976106	0.976106	0.929753	0.95293	no	no	n/a	n/a	n/a	n/a	n/a	n/a	n/a	n/a	n/a
11090301_C04	Extract	2014-11-19	1.13158	1.04359	1.08759	2014-12-05	0.882448	1.10686	0.876912	0.876912	0.937991	0.907452	no	no	n/a	n/a	n/a	n/a	n/a	n/a	n/a	n/a	n/a
11100903_D05	Extract	2014-11-19	1.14918	1.0257	1.08744	2014-12-04	0.822265	0.935169	0.823655	0.823655	0.737172	0.780413	no	no	n/a	n/a	n/a	n/a	n/a	n/a	n/a	n/a	n/a
11001218_D05	Extract	2014-11-25	1.1288	1.04467	1.08674	2014-12-05	1.14015	1.09081	1.06482	1.06482	1.1865	1.12566	no	no	n/a	n/a	n/a	n/a	n/a	n/a	n/a	n/a	n/a
11090204_D02	Extract	2014-11-19	1.01487	1.15836	1.08661	2014-12-04	0.834997	0.511829	1.06374	1.06374	1.05253	1.05813	no	no	n/a	n/a	n/a	n/a	n/a	n/a	n/a	n/a	n/a
11040209_B05	Extract	2014-11-19	1.12254	1.05043	1.08648	2014-12-05	1.04397	0.884229	0.967263	0.967263	1.01147	0.989365	no	no	n/a	n/a	n/a	n/a	n/a	n/a	n/a	n/a	n/a
11090301_C03	Extract	2014-11-19	1.11825	1.05348	1.08587	2014-12-05	0.529772	1.02883	0.897176	0.897176	1.03176	0.96447	no	no	n/a	n/a	n/a	n/a	n/a	n/a	n/a	n/a	n/a
11090205_B04	Extract	2014-11-19	1.08403	1.08682	1.08543	2014-12-04	1.02672	1.08551	0.993832	0.993832	1.1009	1.04737	no	no	n/a	n/a	n/a	n/a	n/a	n/a	n/a	n/a	n/a
11040302_C09	Extract	2014-11-19	1.02003	1.15065	1.08534	2014-12-05	0.882434	1.02491	0.90949	0.90949	0.854364	0.881927	no	no	n/a	n/a	n/a	n/a	n/a	n/a	n/a	n/a	n/a
11010119_F05	Extract	2014-11-25	1.15686	1.01378	1.08532	2014-12-05	0.956389	1.00429	1.06035	1.06035	1.08681	1.07358	no	no	n/a	n/a	n/a	n/a	n/a	n/a	n/a	n/a	n/a
11010341_E08	Extract	2014-11-25	1.09673	1.07227	1.0845	2014-12-05	1.1815	0.979486	0.995291	0.995291	1.12791	1.0616	no	no	n/a	n/a	n/a	n/a	n/a	n/a	n/a	n/a	n/a
11100205_F11	Extract	2014-11-19	1.0746	1.09431	1.08446	2014-11-21	1.07644	1.09166	0.996633	0.996633	1.11184	1.05424	no	no	n/a	n/a	n/a	n/a	n/a	n/a	n/a	n/a	n/a
11090301_D05	Extract	2014-11-19	1.10052	1.06796	1.08424	2014-12-05	0.917381	1.14744	0.912394	0.912394	1.0067	0.959547	no	no	n/a	n/a	n/a	n/a	n/a	n/a	n/a	n/a	n/a
11090501_E06	Extract	2014-11-19	1.12669	1.04131	1.084	2014-12-05	0.835652	1.00245	0.873521	0.873521	0.934068	0.903794	no	no	n/a	n/a	n/a	n/a	n/a	n/a	n/a	n/a	n/a
11010216_F10	Extract	2014-11-25	1.1857	0.981574	1.08364	2014-12-05	0.896357	0.998501	0.953429	0.953429	0.916307	0.934868	no	no	n/a	n/a	n/a	n/a	n/a	n/a	n/a	n/a	n/a
11010119_B05	Extract	2014-11-25	1.06843	1.09882	1.08362	2014-12-05	0.993915	0.990849	1.01288	1.01288	0.932799	0.972837	no	no	n/a	n/a	n/a	n/a	n/a	n/a	n/a	n/a	n/a
11090204_D09	Extract	2014-11-19	1.13147	1.0327	1.08208	2014-12-04	0.977404	0.956036	1.1421	1.1421	0.99033	1.06621	no	no	n/a	n/a	n/a	n/a	n/a	n/a	n/a	n/a	n/a
11010402_G04	Extract	2014-11-25	1.13241	1.03154	1.08198	2014-12-05	1.04155	0.965844	0.919138	0.919138	0.783617	0.851378	no	no	n/a	n/a	n/a	n/a	n/a	n/a	n/a	n/a	n/a
11100304_H11	Extract	2014-11-19	1.13777	1.0256	1.08168	2014-12-04	1.12638	1.06278	1.01366	1.01366	1.00506	1.00936	no	no	n/a	n/a	n/a	n/a	n/a	n/a	n/a	n/a	n/a
11090302_G09	Extract	2014-11-19	1.10362	1.05784	1.08073	2014-12-05	0.953731	1.04348	0.90393	0.90393	0.906409	0.90517	no	no	n/a	n/a	n/a	n/a	n/a	n/a	n/a	n/a	n/a
11010216_D06	Extract	2014-11-25	1.04123	1.1202	1.08071	2014-12-05	0.998626	1.07827	0.938622	0.938622	0.988108	0.963365	no	no	n/a	n/a	n/a	n/a	n/a	n/a	n/a	n/a	n/a
11040208_F05	Extract	2014-11-19	1.00177	1.15939	1.08058	2014-12-05	0.967216	1.12075	0.757694	0.757694	0.874081	0.815887	no	no	n/a	n/a	n/a	n/a	n/a	n/a	n/a	n/a	n/a
11100806_A11	Extract	2014-11-19	1.02991	1.13098	1.08044	2014-11-20	1.13468	1.06375	1.16024	1.16024	1.05372	1.10698	no	no	n/a	n/a	n/a	n/a	n/a	n/a	n/a	n/a	n/a
11100702_G06	Extract	2014-11-19	1.11141	1.04875	1.08008	2014-11-20	1.23403	1.2186	1.05079	1.05079	1.19558	1.12318	no	no	n/a	n/a	n/a	n/a	n/a	n/a	n/a	n/a	n/a
11020708_C03	Extract	2014-11-24	1.16168	0.998005	1.07984	2014-12-05	1.05699	0.970506	0.835243	0.835243	0.915264	0.875253	no	no	n/a	n/a	n/a	n/a	n/a	n/a	n/a	n/a	Did not follow up.
11090301_F02	Extract	2014-11-19	1.14821	1.01095	1.07958	2014-12-05	1.00317	0.926878	1.00051	1.00051	0.878102	0.939307	no	no	n/a	n/a	n/a	n/a	n/a	n/a	n/a	n/a	n/a
11020709_A06	Extract	2014-11-24	1.01088	1.14783	1.07936	2014-12-05	0.868635	1.00146	0.810306	0.810306	0.855258	0.832782	no	no	n/a	n/a	n/a	n/a	n/a	n/a	n/a	n/a	n/a
11020901_C02	Extract	2014-11-24	1.09706	1.05913	1.07809	2014-12-05	1.25765	0.98223	0.963305	0.963305	1.00843	0.985866	no	no	n/a	n/a	n/a	n/a	n/a	n/a	n/a	n/a	n/a
11100903_G07	Extract	2014-11-19	1.00309	1.152	1.07754	2014-12-04	0.897479	1.04825	0.858299	0.858299	0.94618	0.902239	no	no	n/a	n/a	n/a	n/a	n/a	n/a	n/a	n/a	n/a
11040303_B08	Extract	2014-11-19	1.04338	1.11158	1.07748	2014-12-05	1.05703	1.12367	0.921045	0.921045	1.0054	0.963222	no	no	n/a	n/a	n/a	n/a	n/a	n/a	n/a	n/a	n/a
11040208_H06	Extract	2014-11-19	1.10309	1.05149	1.07729	2014-12-05	0.983348	0.921081	0.881699	0.881699	0.943529	0.912614	no	no	n/a	n/a	n/a	n/a	n/a	n/a	n/a	n/a	n/a
11040302_D08	Extract	2014-11-19	0.95467	1.19989	1.07728	2014-12-05	0.843502	1.04722	0.749453	0.749453	0.893798	0.821625	no	no	n/a	n/a	n/a	n/a	n/a	n/a	n/a	n/a	n/a
11020901_E03	Extract	2014-11-24	1.08221	1.07217	1.07719	2014-12-05	0.786448	0.878611	0.885612	0.885612	0.953244	0.919428	no	no	n/a	n/a	n/a	n/a	n/a	n/a	n/a	n/a	n/a
11090204_F06	Extract	2014-11-19	1.05937	1.09364	1.0765	2014-12-04	0.848695	0.957053	0.979733	0.979733	0.946811	0.963272	no	no	n/a	n/a	n/a	n/a	n/a	n/a	n/a	n/a	n/a
11010353_F05	Extract	2014-11-25	1.07869	1.0743	1.07649	2014-12-05	0.965547	0.990514	0.842334	0.842334	0.780167	0.81125	no	no	n/a	n/a	n/a	n/a	n/a	n/a	n/a	n/a	n/a
11020709_E03	Extract	2014-11-24	1.1215	1.0314	1.07645	2014-12-05	0.967063	1.10979	1.06676	1.06676	0.927082	0.996922	no	no	n/a	n/a	n/a	n/a	n/a	n/a	n/a	n/a	n/a
11090301_C12	Extract	2014-11-19	1.18573	0.967082	1.07641	2014-12-05	1.0386	1.10686	0.922232	0.922232	1.03079	0.976512	no	no	n/a	n/a	n/a	n/a	n/a	n/a	n/a	n/a	n/a
11100807_C10	Extract	2014-11-19	1.1616	0.991061	1.07633	2014-12-04	0.993356	0.926616	0.939221	0.939221	0.959253	0.949237	no	no	n/a	n/a	n/a	n/a	n/a	n/a	n/a	n/a	n/a
11040302_F10	Extract	2014-11-19	1.04909	1.10355	1.07632	2014-12-05	1.05789	1.03217	0.881425	0.881425	0.901679	0.891552	no	no	n/a	n/a	n/a	n/a	n/a	n/a	n/a	n/a	n/a
11100205_E10	Extract	2014-11-19	1.13213	1.02035	1.07624	2014-11-21	1.03648	1.16144	0.991385	0.991385	0.996669	0.994027	no	no	n/a	n/a	n/a	n/a	n/a	n/a	n/a	n/a	n/a
11010535_D04	Extract	2014-11-25	1.06484	1.08757	1.0762	2014-12-05	1.07581	0.978528	0.987922	0.987922	0.848864	0.918393	no	no	n/a	n/a	n/a	n/a	n/a	n/a	n/a	n/a	n/a
11010353_F08	Extract	2014-11-25	1.11468	1.03757	1.07612	2014-12-05	0.923806	0.947741	0.891202	0.891202	0.912701	0.901951	no	no	n/a	n/a	n/a	n/a	n/a	n/a	n/a	n/a	n/a
11010341_D06	Extract	2014-11-25	1.09241	1.05983	1.07612	2014-12-05	1.15612	1.15788	0.971568	0.971568	0.962241	0.966905	no	no	n/a	n/a	n/a	n/a	n/a	n/a	n/a	n/a	n/a
11090301_E10	Extract	2014-11-19	1.1014	1.05026	1.07583	2014-12-05	0.923076	1.07685	0.826519	0.826519	0.876805	0.851662	no	no	n/a	n/a	n/a	n/a	n/a	n/a	n/a	n/a	n/a
11090205_B03	Extract	2014-11-19	1.08574	1.06548	1.07561	2014-12-04	1.04419	0.998497	1.03866	1.03866	1.07255	1.0556	no	no	n/a	n/a	n/a	n/a	n/a	n/a	n/a	n/a	n/a
11020708_D05	Extract	2014-11-24	1.06193	1.08792	1.07493	2014-12-05	0.922208	1.12423	0.81553	0.81553	0.859112	0.837321	no	no	n/a	n/a	n/a	n/a	n/a	n/a	n/a	n/a	n/a
11010216_C05	Extract	2014-11-25	1.09351	1.0563	1.07491	2014-12-05	1.0418	1.10844	1.00813	1.00813	0.935054	0.97159	no	no	n/a	n/a	n/a	n/a	n/a	n/a	n/a	n/a	n/a
11010535_E07	Extract	2014-11-25	1.18805	0.961711	1.07488	2014-12-05	1.09578	0.97331	0.918069	0.918069	0.866778	0.892424	no	no	n/a	n/a	n/a	n/a	n/a	n/a	n/a	n/a	n/a
11010353_B11	Extract	2014-11-25	1.16121	0.987595	1.0744	2014-12-05	1.00265	0.853445	0.986853	0.986853	0.945338	0.966096	no	no	n/a	n/a	n/a	n/a	n/a	n/a	n/a	n/a	n/a
11100702_D08	Extract	2014-11-19	1.1394	1.00887	1.07414	2014-11-20	1.45044	1.35513	1.15107	1.15107	1.09248	1.12177	no	no	n/a	n/a	n/a	n/a	n/a	n/a	n/a	n/a	n/a
11020708_H03	Extract	2014-11-24	1.09795	1.0501	1.07402	2014-12-05	0.989588	1.15061	0.856374	0.856374	0.904238	0.880306	no	no	n/a	n/a	n/a	n/a	n/a	n/a	n/a	n/a	n/a
11100903_B07	Extract	2014-11-19	1.07388	1.07335	1.07362	2014-12-04	1.08815	1.01153	0.925743	0.925743	1.01336	0.969551	no	no	n/a	n/a	n/a	n/a	n/a	n/a	n/a	n/a	n/a
11090204_E02	Extract	2014-11-19	0.995514	1.15086	1.07319	2014-12-04	0.911662	0.969596	1.04649	1.04649	0.952694	0.999591	no	no	n/a	n/a	n/a	n/a	n/a	n/a	n/a	n/a	n/a
11010535_D06	Extract	2014-11-25	1.16564	0.980675	1.07316	2014-12-05	0.980588	1.07606	0.860593	0.860593	0.810475	0.835534	no	no	n/a	n/a	n/a	n/a	n/a	n/a	n/a	n/a	n/a
11090204_C04	Extract	2014-11-19	1.01559	1.12995	1.07277	2014-12-04	0.935814	0.988779	0.962514	0.962514	0.973748	0.968131	no	no	n/a	n/a	n/a	n/a	n/a	n/a	n/a	n/a	n/a
11010341_D09	Extract	2014-11-25	1.05417	1.08797	1.07107	2014-12-05	1.01152	1.03259	0.979374	0.979374	1.74538	1.36238	no	no	n/a	n/a	n/a	n/a	n/a	n/a	n/a	n/a	n/a
11001218_E10	Extract	2014-11-25	1.06251	1.07878	1.07065	2014-12-05	1.03499	1.02028	1.0841	1.0841	1.13245	1.10828	no	no	n/a	n/a	n/a	n/a	n/a	n/a	n/a	n/a	n/a
11090302_H05	Extract	2014-11-19	1.18307	0.957421	1.07024	2014-12-05	0.970133	1.06796	0.883106	0.883106	0.950702	0.916904	no	no	n/a	n/a	n/a	n/a	n/a	n/a	n/a	n/a	n/a
11020901_B05	Extract	2014-11-24	1.11125	1.0249	1.06807	2014-12-05	0.805016	1.02859	0.792011	0.792011	0.941197	0.866604	no	no	n/a	n/a	n/a	n/a	n/a	n/a	n/a	n/a	n/a
11001218_D03	Extract	2014-11-25	1.07923	1.05684	1.06803	2014-12-05	1.07114	1.03582	0.976318	0.976318	1.13567	1.05599	no	no	n/a	n/a	n/a	n/a	n/a	n/a	n/a	n/a	n/a
11040208_B04	Extract	2014-11-19	1.09582	1.03956	1.06769	2014-12-05	1.13523	1.01907	0.841834	0.841834	0.81345	0.827642	no	no	n/a	n/a	n/a	n/a	n/a	n/a	n/a	n/a	n/a
11100806_D03	Extract	2014-11-19	1.11562	1.01915	1.06739	2014-11-20	1.20053	1.12843	1.02759	1.02759	0.823459	0.925525	no	no	n/a	n/a	n/a	n/a	n/a	n/a	n/a	n/a	n/a
11010341_B07	Extract	2014-11-25	1.04932	1.085	1.06716	2014-12-05	1.11855	0.965564	1.00396	1.00396	1.00299	1.00347	no	no	n/a	n/a	n/a	n/a	n/a	n/a	n/a	n/a	n/a
11001218_G10	Extract	2014-11-25	1.15198	0.981574	1.06678	2014-12-05	1.11197	1.02422	0.96404	0.96404	1.05475	1.0094	no	no	n/a	n/a	n/a	n/a	n/a	n/a	n/a	n/a	n/a
11020709_D03	Extract	2014-11-24	1.12326	1.00829	1.06577	2014-12-05	0.917403	1.16967	0.852805	0.852805	0.965827	0.909316	no	no	n/a	n/a	n/a	n/a	n/a	n/a	n/a	n/a	n/a
11090204_C06	Extract	2014-11-19	1.09807	1.03314	1.06561	2014-12-04	0.89997	0.939677	1.12644	1.12644	0.976879	1.05166	no	no	n/a	n/a	n/a	n/a	n/a	n/a	n/a	n/a	n/a
11100302_G08	Extract	2014-11-19	1.14495	0.986239	1.0656	2014-11-21	1.05296	1.0789	1.02577	1.02577	1.12968	1.07772	no	no	n/a	n/a	n/a	n/a	n/a	n/a	n/a	n/a	n/a
11010119_B04	Extract	2014-11-25	1.05498	1.07526	1.06512	2014-12-05	1.0716	1.04326	0.931372	0.931372	0.970649	0.95101	no	no	n/a	n/a	n/a	n/a	n/a	n/a	n/a	n/a	n/a
11020901_F04	Extract	2014-11-24	1.06718	1.06272	1.06495	2014-12-05	0.677648	0.832883	0.567748	0.567748	0.729144	0.648446	no	no	n/a	n/a	n/a	n/a	n/a	n/a	n/a	n/a	n/a
11040302_B07	Extract	2014-11-19	1.06047	1.06933	1.0649	2014-12-05	1.00698	1.03291	0.884164	0.884164	0.955969	0.920066	no	no	n/a	n/a	n/a	n/a	n/a	n/a	n/a	n/a	n/a
11040208_E04	Extract	2014-11-19	1.0055	1.123	1.06425	2014-12-05	1.00781	1.11566	0.857495	0.857495	0.822538	0.840017	no	no	n/a	n/a	n/a	n/a	n/a	n/a	n/a	n/a	n/a
11040209_F08	Extract	2014-11-19	1.06716	1.06112	1.06414	2014-12-05	0.883818	1.01955	0.62772	0.62772	0.702544	0.665132	no	no	n/a	n/a	n/a	n/a	n/a	n/a	n/a	n/a	n/a
11090204_C03	Extract	2014-11-19	1.01415	1.11411	1.06413	2014-12-04	0.90594	0.899785	0.966288	0.966288	0.970652	0.96847	no	no	n/a	n/a	n/a	n/a	n/a	n/a	n/a	n/a	n/a
11010353_G11	Extract	2014-11-25	1.07701	1.05111	1.06406	2014-12-05	0.892951	0.884188	0.825412	0.825412	0.874571	0.849991	no	no	n/a	n/a	n/a	n/a	n/a	n/a	n/a	n/a	n/a
11100804_C06	Extract	2014-11-19	1.01813	1.1082	1.06317	2014-11-20	1.1185	1.1418	0.925944	0.925944	1.03006	0.978001	no	no	n/a	n/a	n/a	n/a	n/a	n/a	n/a	n/a	n/a
11001218_C11	Extract	2014-11-25	0.963382	1.16191	1.06265	2014-12-05	1.09108	1.03559	1.00674	1.00674	0.925681	0.966208	no	no	n/a	n/a	n/a	n/a	n/a	n/a	n/a	n/a	n/a
11090301_D04	Extract	2014-11-19	1.04416	1.08084	1.0625	2014-12-05	1.02007	1.23055	1.03941	1.03941	0.922687	0.98105	no	no	n/a	n/a	n/a	n/a	n/a	n/a	n/a	n/a	n/a
11020709_B09	Extract	2014-11-24	1.14334	0.98142	1.06238	2014-12-05	0.933797	1.18219	0.830728	0.830728	0.927337	0.879033	no	no	n/a	n/a	n/a	n/a	n/a	n/a	n/a	n/a	n/a
11100905_G02	Extract	2014-11-19	1.04397	1.07985	1.06191	2014-12-04	0.771769	1.03609	0.919399	0.919399	0.932502	0.925951	no	no	n/a	n/a	n/a	n/a	n/a	n/a	n/a	n/a	n/a
11010341_C10	Extract	2014-11-25	1.09783	1.02598	1.0619	2014-12-05	0.990627	0.998732	0.984124	0.984124	1.04506	1.01459	no	no	n/a	n/a	n/a	n/a	n/a	n/a	n/a	n/a	n/a
11010341_D11	Extract	2014-11-25	1.13098	0.992129	1.06155	2014-12-05	1.01458	1.05647	1.05254	1.05254	0.999768	1.02616	no	no	n/a	n/a	n/a	n/a	n/a	n/a	n/a	n/a	n/a
11020708_C07	Extract	2014-11-24	1.11888	1.00264	1.06076	2014-12-05	1.00052	1.03878	0.829783	0.829783	0.802193	0.815988	no	no	n/a	n/a	n/a	n/a	n/a	n/a	n/a	n/a	n/a
11100807_E07	Extract	2014-11-19	1.09891	1.02245	1.06068	2014-12-04	1.0158	0.968504	0.882623	0.882623	0.87994	0.881282	no	no	n/a	n/a	n/a	n/a	n/a	n/a	n/a	n/a	n/a
11090205_F08	Extract	2014-11-19	1.07824	1.04216	1.0602	2014-12-04	0.899723	0.989033	0.976302	0.976302	0.908143	0.942223	no	no	n/a	n/a	n/a	n/a	n/a	n/a	n/a	n/a	n/a
11001218_H10	Extract	2014-11-25	1.04581	1.07445	1.06013	2014-12-05	1.01574	1.01217	0.911844	0.911844	1.02499	0.968417	no	no	n/a	n/a	n/a	n/a	n/a	n/a	n/a	n/a	n/a
11040208_F06	Extract	2014-11-19	0.991951	1.12781	1.05988	2014-12-05	0.834066	0.959163	0.675252	0.675252	0.750433	0.712842	no	no	n/a	n/a	n/a	n/a	n/a	n/a	n/a	n/a	n/a
11100701_B08	Extract	2014-11-19	1.20804	0.911163	1.0596	2014-12-04	1.09523	1.02941	1.14094	1.14094	1.14431	1.14262	no	no	n/a	n/a	n/a	n/a	n/a	n/a	n/a	n/a	n/a
11020901_C03	Extract	2014-11-24	1.09073	1.02825	1.05949	2014-12-05	1.01716	1.07899	0.935981	0.935981	1.09646	1.01622	no	no	n/a	n/a	n/a	n/a	n/a	n/a	n/a	n/a	n/a
11010216_C10	Extract	2014-11-25	1.05956	1.05764	1.0586	2014-12-05	0.97633	1.02422	1.02629	1.02629	0.939918	0.983106	no	no	n/a	n/a	n/a	n/a	n/a	n/a	n/a	n/a	n/a
11100302_H10	Extract	2014-11-19	1.11508	1.0016	1.05834	2014-11-21	1.03974	0.994851	0.93786	0.93786	1.10513	1.02149	no	no	n/a	n/a	n/a	n/a	n/a	n/a	n/a	n/a	n/a
11020711_F05	Extract	2014-11-24	1.09816	1.01818	1.05817	2014-12-05	0.779012	1.11789	0.801277	0.801277	0.895279	0.848278	no	no	n/a	n/a	n/a	n/a	n/a	n/a	n/a	n/a	n/a
11090206_B03	Extract	2014-11-19	1.14671	0.969165	1.05794	2014-12-04	0.911662	0.957842	0.960954	0.960954	0.930952	0.945953	no	no	n/a	n/a	n/a	n/a	n/a	n/a	n/a	n/a	n/a
11090204_F05	Extract	2014-11-19	0.968684	1.14713	1.05791	2014-12-04	0.877305	0.865007	0.929293	0.929293	0.966524	0.947908	no	no	n/a	n/a	n/a	n/a	n/a	n/a	n/a	n/a	n/a
11100805_C08	Extract	2014-11-19	1.10874	1.00685	1.0578	2014-11-20	1.11938	1.03831	0.893885	0.893885	0.837907	0.865896	no	no	n/a	n/a	n/a	n/a	n/a	n/a	n/a	n/a	n/a
11090201_F06	Extract	2014-11-19	1.06276	1.05272	1.05774	2014-12-04	0.880055	0.909758	0.916472	0.916472	0.963393	0.939933	no	no	n/a	n/a	n/a	n/a	n/a	n/a	n/a	n/a	n/a
11100206_E12	Extract	2014-11-19	1.09806	1.01698	1.05752	2014-11-21	1.09565	1.04942	0.989818	0.989818	1.10738	1.0486	no	no	n/a	n/a	n/a	n/a	n/a	n/a	n/a	n/a	n/a
11100906_C10	Extract	2014-11-19	1.0757	1.03848	1.05709	2014-12-04	0.981571	0.961519	0.869408	0.869408	0.899973	0.88469	no	no	n/a	n/a	n/a	n/a	n/a	n/a	n/a	n/a	n/a
11010216_C04	Extract	2014-11-25	1.23101	0.882829	1.05692	2014-12-05	1.04648	1.05601	1.15616	1.15616	0.875236	1.0157	no	no	n/a	n/a	n/a	n/a	n/a	n/a	n/a	n/a	n/a
11010216_D03	Extract	2014-11-25	1.14633	0.966144	1.05624	2014-12-05	1.07911	1.06599	0.906538	0.906538	0.880745	0.893641	no	no	n/a	n/a	n/a	n/a	n/a	n/a	n/a	n/a	n/a
11040208_A02	Extract	2014-11-19	1.08167	1.03063	1.05615	2014-12-05	1.12411	1.05279	0.927643	0.927643	1.00781	0.967729	no	no	n/a	n/a	n/a	n/a	n/a	n/a	n/a	n/a	n/a
11020901_D11	Extract	2014-11-24	1.10885	1.00199	1.05542	2014-12-05	0.812235	0.999356	0.891545	0.891545	0.870904	0.881224	no	no	n/a	n/a	n/a	n/a	n/a	n/a	n/a	n/a	n/a
11010353_C07	Extract	2014-11-25	1.02885	1.08185	1.05535	2014-12-05	0.965805	1.06113	1.01802	1.01802	0.820281	0.919152	no	no	n/a	n/a	n/a	n/a	n/a	n/a	n/a	n/a	n/a
11090301_F04	Extract	2014-11-19	1.06302	1.04658	1.0548	2014-12-05	0.850849	1.01373	0.853537	0.853537	0.904139	0.878838	no	no	n/a	n/a	n/a	n/a	n/a	n/a	n/a	n/a	n/a
11001218_G04	Extract	2014-11-25	1.07465	1.03328	1.05396	2014-12-05	1.04037	1.0741	1.04807	1.04807	1.03504	1.04156	no	no	n/a	n/a	n/a	n/a	n/a	n/a	n/a	n/a	n/a
11010341_F09	Extract	2014-11-25	1.05388	1.05277	1.05332	2014-12-05	1.0101	1.01332	0.978819	0.978819	0.923426	0.951122	no	no	n/a	n/a	n/a	n/a	n/a	n/a	n/a	n/a	n/a
11090206_E08	Extract	2014-11-19	1.01028	1.09519	1.05273	2014-12-04	0.883275	0.927134	0.984443	0.984443	1.03041	1.00743	no	no	n/a	n/a	n/a	n/a	n/a	n/a	n/a	n/a	n/a
11010216_C09	Extract	2014-11-25	1.04257	1.06171	1.05214	2014-12-05	1.08874	1.07922	0.959568	0.959568	1.04828	1.00392	no	no	n/a	n/a	n/a	n/a	n/a	n/a	n/a	n/a	n/a
11040302_D12	Extract	2014-11-19	1.03416	1.06986	1.05201	2014-12-05	0.995578	0.949226	0.741485	0.741485	0.821632	0.781559	no	no	n/a	n/a	n/a	n/a	n/a	n/a	n/a	n/a	n/a
11090304_E02	Extract	2014-11-19	1.10739	0.996474	1.05193	2014-12-05	0.929741	0.833606	0.910685	0.910685	0.934068	0.922376	no	no	n/a	n/a	n/a	n/a	n/a	n/a	n/a	n/a	n/a
11040302_E07	Extract	2014-11-19	0.969773	1.13405	1.05191	2014-12-05	0.992507	0.980266	0.862725	0.862725	0.842859	0.852792	no	no	n/a	n/a	n/a	n/a	n/a	n/a	n/a	n/a	n/a
11090201_G04	Extract	2014-11-19	1.0209	1.08221	1.05156	2014-12-04	0.907922	0.916907	0.971903	0.971903	0.978943	0.975423	no	no	n/a	n/a	n/a	n/a	n/a	n/a	n/a	n/a	n/a
11010216_E07	Extract	2014-11-25	1.0698	1.03274	1.05127	2014-12-05	1.04061	1.02005	1.05002	1.05002	1.01401	1.03201	no	no	n/a	n/a	n/a	n/a	n/a	n/a	n/a	n/a	n/a
11010119_C02	Extract	2014-11-25	1.08595	1.01623	1.05109	2014-12-05	0.998136	0.983888	0.971013	0.971013	0.925036	0.948024	no	no	n/a	n/a	n/a	n/a	n/a	n/a	n/a	n/a	n/a
11100807_F08	Extract	2014-11-19	0.960973	1.14118	1.05108	2014-12-04	0.873459	1.02347	0.923611	0.923611	0.969874	0.946742	no	no	n/a	n/a	n/a	n/a	n/a	n/a	n/a	n/a	n/a
11010341_F08	Extract	2014-11-25	1.07599	1.02598	1.05098	2014-12-05	1.08005	1.00846	1.00199	1.00199	1.01691	1.00945	no	no	n/a	n/a	n/a	n/a	n/a	n/a	n/a	n/a	n/a
11090302_C07	Extract	2014-11-19	1.12226	0.978341	1.0503	2014-12-05	0.88909	1.04515	0.854378	0.854378	0.978036	0.916207	no	no	n/a	n/a	n/a	n/a	n/a	n/a	n/a	n/a	n/a
11090204_B05	Extract	2014-11-19	1.07437	1.0261	1.05024	2014-12-04	1.0479	1.15181	1.15526	1.15526	1.03939	1.09732	no	no	n/a	n/a	n/a	n/a	n/a	n/a	n/a	n/a	n/a
11010216_B05	Extract	2014-11-25	1.12476	0.975084	1.04992	2014-12-05	1.10024	1.07085	0.891176	0.891176	0.933122	0.912149	no	no	n/a	n/a	n/a	n/a	n/a	n/a	n/a	n/a	n/a
11001218_F09	Extract	2014-11-25	1.04822	1.05116	1.04969	2014-12-05	0.903843	0.964181	0.98943	0.98943	1.0046	0.997015	no	no	n/a	n/a	n/a	n/a	n/a	n/a	n/a	n/a	n/a
11100807_D12	Extract	2014-11-19	1.08162	1.01748	1.04955	2014-12-04	0.979521	0.893975	0.829736	0.829736	0.918522	0.874129	no	no	n/a	n/a	n/a	n/a	n/a	n/a	n/a	n/a	n/a
11020709_B04	Extract	2014-11-24	1.08178	1.01586	1.04882	2014-12-05	0.834303	1.17314	0.838788	0.838788	1.01792	0.928355	no	no	n/a	n/a	n/a	n/a	n/a	n/a	n/a	n/a	n/a
11010416_E04	Extract	2014-11-25	1.1875	0.909972	1.04874	2014-12-05	1.0867	1.02128	0.872409	0.872409	0.8122	0.842304	no	no	n/a	n/a	n/a	n/a	n/a	n/a	n/a	n/a	n/a
11001218_B11	Extract	2014-11-25	1.03825	1.05818	1.04822	2014-12-05	1.02209	1.05091	0.943928	0.943928	1.01304	0.978484	no	no	n/a	n/a	n/a	n/a	n/a	n/a	n/a	n/a	n/a
11010341_H02	Extract	2014-11-25	1.10131	0.994849	1.04808	2014-12-05	0.945124	0.892084	0.892315	0.892315	0.992327	0.942321	no	no	n/a	n/a	n/a	n/a	n/a	n/a	n/a	n/a	n/a
11040302_D11	Extract	2014-11-19	1.09935	0.996595	1.04797	2014-12-05	1.03786	1.05862	0.734065	0.734065	0.903793	0.818929	no	no	n/a	n/a	n/a	n/a	n/a	n/a	n/a	n/a	n/a
11090302_H10	Extract	2014-11-19	1.0608	1.03418	1.04749	2014-12-05	0.925227	1.02836	0.866206	0.866206	0.902518	0.884362	no	no	n/a	n/a	n/a	n/a	n/a	n/a	n/a	n/a	n/a
11010216_D07	Extract	2014-11-25	1.09485	0.999723	1.04729	2014-12-05	0.979618	0.973908	0.985513	0.985513	0.978734	0.982124	no	no	n/a	n/a	n/a	n/a	n/a	n/a	n/a	n/a	n/a
11020901_G03	Extract	2014-11-24	1.03467	1.05978	1.04722	2014-12-05	0.935123	0.844988	0.822172	0.822172	0.931191	0.876681	no	no	n/a	n/a	n/a	n/a	n/a	n/a	n/a	n/a	n/a
11010216_D04	Extract	2014-11-25	1.01942	1.07499	1.0472	2014-12-05	1.02372	1.04464	0.953151	0.953151	0.932155	0.942653	no	no	n/a	n/a	n/a	n/a	n/a	n/a	n/a	n/a	n/a
11001218_C03	Extract	2014-11-25	1.14823	0.946137	1.04718	2014-12-05	1.0066	1.12027	0.838174	0.838174	1.06738	0.952778	no	no	n/a	n/a	n/a	n/a	n/a	n/a	n/a	n/a	n/a
11100305_H03	Extract	2014-11-19	1.12214	0.971587	1.04686	2014-12-04	1.0116	1.16821	1.04181	1.04181	0.982428	1.01212	no	no	n/a	n/a	n/a	n/a	n/a	n/a	n/a	n/a	n/a
11090301_D07	Extract	2014-11-19	1.10294	0.990742	1.04684	2014-12-05	0.758957	1.11886	0.848492	0.848492	0.91779	0.883141	no	no	n/a	n/a	n/a	n/a	n/a	n/a	n/a	n/a	n/a
11010341_B09	Extract	2014-11-25	1.00754	1.08608	1.04681	2014-12-05	1.16739	1.1834	1.15002	1.15002	1.08938	1.1197	no	no	n/a	n/a	n/a	n/a	n/a	n/a	n/a	n/a	n/a
11100805_H07	Extract	2014-11-19	1.08942	1.00343	1.04642	2014-11-20	1.07239	1.17163	1.25713	1.25713	1.15281	1.20497	no	no	n/a	n/a	n/a	n/a	n/a	n/a	n/a	n/a	n/a
11100903_G12	Extract	2014-11-19	1.00064	1.09155	1.0461	2014-12-04	0.984973	1.02662	0.900076	0.900076	0.915466	0.907771	no	no	n/a	n/a	n/a	n/a	n/a	n/a	n/a	n/a	n/a
11010353_H04	Extract	2014-11-25	1.04243	1.04931	1.04587	2014-12-05	0.911629	0.899345	0.971802	0.971802	0.733985	0.852894	no	no	n/a	n/a	n/a	n/a	n/a	n/a	n/a	n/a	n/a
11090304_A05	Extract	2014-11-19	1.13356	0.957878	1.04572	2014-12-05	0.983439	0.925447	0.970382	0.970382	0.967628	0.969005	no	no	n/a	n/a	n/a	n/a	n/a	n/a	n/a	n/a	n/a
11020711_D04	Extract	2014-11-24	1.1405	0.950336	1.04542	2014-12-05	0.858785	1.06265	0.880128	0.880128	0.898852	0.88949	no	no	n/a	n/a	n/a	n/a	n/a	n/a	n/a	n/a	n/a
11090304_C04	Extract	2014-11-19	1.13447	0.956279	1.04537	2014-12-05	0.989395	1.06411	0.902248	0.902248	0.969249	0.935749	no	no	n/a	n/a	n/a	n/a	n/a	n/a	n/a	n/a	n/a
11010535_H05	Extract	2014-11-25	1.06704	1.02343	1.04523	2014-12-05	0.892435	0.958603	0.78999	0.78999	0.768607	0.779299	no	no	n/a	n/a	n/a	n/a	n/a	n/a	n/a	n/a	n/a
11040302_C07	Extract	2014-11-19	1.02808	1.06218	1.04513	2014-12-05	0.8813	1.00233	0.755777	0.755777	0.805871	0.780824	no	no	n/a	n/a	n/a	n/a	n/a	n/a	n/a	n/a	n/a
11010341_A08	Extract	2014-11-25	1.09	0.999992	1.045	2014-12-05	1.13453	1.03328	0.857147	0.857147	1.66199	1.25957	no	no	n/a	n/a	n/a	n/a	n/a	n/a	n/a	n/a	n/a
11010119_D02	Extract	2014-11-25	1.16088	0.928822	1.04485	2014-12-05	1.08499	1.07945	0.855758	0.855758	0.931511	0.893634	no	no	n/a	n/a	n/a	n/a	n/a	n/a	n/a	n/a	n/a
11020901_D09	Extract	2014-11-24	1.0807	1.00894	1.04482	2014-12-05	0.815735	1.00743	0.762324	0.762324	0.834991	0.798658	no	no	n/a	n/a	n/a	n/a	n/a	n/a	n/a	n/a	n/a
11100807_E08	Extract	2014-11-19	1.07103	1.01834	1.04469	2014-12-04	0.902459	0.952072	0.896364	0.896364	0.849861	0.873113	no	no	n/a	n/a	n/a	n/a	n/a	n/a	n/a	n/a	n/a
11010341_E03	Extract	2014-11-25	1.06277	1.02652	1.04465	2014-12-05	1.06831	0.99456	1.0249	1.0249	1.04377	1.03434	no	no	n/a	n/a	n/a	n/a	n/a	n/a	n/a	n/a	n/a
11040303_C07	Extract	2014-11-19	0.972131	1.11621	1.04417	2014-12-05	1.09934	1.08508	0.894897	0.894897	0.904396	0.899647	no	no	n/a	n/a	n/a	n/a	n/a	n/a	n/a	n/a	n/a
11010353_H06	Extract	2014-11-25	1.06512	1.02313	1.04412	2014-12-05	0.886476	0.948213	0.809853	0.809853	0.802395	0.806124	no	no	n/a	n/a	n/a	n/a	n/a	n/a	n/a	n/a	n/a
11010416_C05	Extract	2014-11-25	1.09447	0.993617	1.04404	2014-12-05	1.02599	0.978977	0.814932	0.814932	0.761102	0.788017	no	no	n/a	n/a	n/a	n/a	n/a	n/a	n/a	n/a	n/a
11100804_H06	Extract	2014-11-19	1.05078	1.03687	1.04382	2014-11-20	0.977356	1.06089	0.984932	0.984932	1.00453	0.99473	no	no	n/a	n/a	n/a	n/a	n/a	n/a	n/a	n/a	n/a
11090501_E03	Extract	2014-11-19	1.12891	0.958563	1.04374	2014-12-05	0.816649	1.16712	0.900287	0.900287	0.944833	0.92256	no	no	n/a	n/a	n/a	n/a	n/a	n/a	n/a	n/a	n/a
11100102_F03	Extract	2014-11-19	1.0777	1.00961	1.04366	2014-11-21	0.900473	1.13017	1.04809	1.04809	1.17126	1.10968	no	no	n/a	n/a	n/a	n/a	n/a	n/a	n/a	n/a	n/a
11001218_F12	Extract	2014-11-25	1.07221	1.01461	1.04341	2014-12-05	1.02113	0.948416	0.976874	0.976874	0.98843	0.982652	no	no	n/a	n/a	n/a	n/a	n/a	n/a	n/a	n/a	n/a
11100906_F10	Extract	2014-11-19	1.03441	1.05212	1.04326	2014-12-04	0.972964	1.00748	0.800384	0.800384	0.904239	0.852311	no	no	n/a	n/a	n/a	n/a	n/a	n/a	n/a	n/a	n/a
11090304_B07	Extract	2014-11-19	1.15022	0.936296	1.04326	2014-12-05	1.05335	1.01781	0.82935	0.82935	0.949048	0.889199	no	no	n/a	n/a	n/a	n/a	n/a	n/a	n/a	n/a	n/a
11001218_E04	Extract	2014-11-25	1.10051	0.985101	1.0428	2014-12-05	1.09579	1.02957	0.952595	0.952595	1.08777	1.02018	no	no	n/a	n/a	n/a	n/a	n/a	n/a	n/a	n/a	n/a
11090501_C08	Extract	2014-11-19	1.00847	1.07648	1.04247	2014-12-05	0.876516	1.04467	0.863123	0.863123	0.982932	0.923027	no	no	n/a	n/a	n/a	n/a	n/a	n/a	n/a	n/a	n/a
11010535_C05	Extract	2014-11-25	1.14125	0.943076	1.04216	2014-12-05	1.00731	1.11341	0.781115	0.781115	0.832991	0.807053	no	no	n/a	n/a	n/a	n/a	n/a	n/a	n/a	n/a	n/a
11020709_F06	Extract	2014-11-24	1.14334	0.940886	1.04211	2014-12-05	0.729417	1.2213	0.832146	0.832146	0.932212	0.882179	no	no	n/a	n/a	n/a	n/a	n/a	n/a	n/a	n/a	n/a
11010535_C06	Extract	2014-11-25	1.05267	1.03154	1.04211	2014-12-05	1.07398	1.07381	0.918871	0.918871	0.864765	0.891818	no	no	n/a	n/a	n/a	n/a	n/a	n/a	n/a	n/a	n/a
11001218_C08	Extract	2014-11-25	1.08729	0.995388	1.04134	2014-12-05	1.14439	1.17715	1.00646	1.00646	1.08552	1.04599	no	no	n/a	n/a	n/a	n/a	n/a	n/a	n/a	n/a	n/a
11090301_G06	Extract	2014-11-19	1.12825	0.953516	1.04088	2014-12-05	1.02887	1.09052	1.02248	1.02248	0.924632	0.973558	no	no	n/a	n/a	n/a	n/a	n/a	n/a	n/a	n/a	n/a
11090301_D09	Extract	2014-11-19	1.07743	1.00383	1.04063	2014-12-05	0.833501	1.18057	0.870718	0.870718	0.96111	0.915914	no	no	n/a	n/a	n/a	n/a	n/a	n/a	n/a	n/a	n/a
11001218_F08	Extract	2014-11-25	1.03314	1.0479	1.04052	2014-12-05	0.985472	0.95676	0.859647	0.859647	0.945749	0.902698	no	no	n/a	n/a	n/a	n/a	n/a	n/a	n/a	n/a	n/a
11010416_B02	Extract	2014-11-25	1.08725	0.992419	1.03984	2014-12-05	1.04	1.06407	0.854417	0.854417	0.814529	0.834473	no	no	n/a	n/a	n/a	n/a	n/a	n/a	n/a	n/a	n/a
11040302_A08	Extract	2014-11-19	1.04182	1.03777	1.0398	2014-12-05	0.931632	1.07732	0.895444	0.895444	0.914723	0.905084	no	no	n/a	n/a	n/a	n/a	n/a	n/a	n/a	n/a	n/a
11020711_E04	Extract	2014-11-24	1.03706	1.04234	1.0397	2014-12-05	0.535779	0.793513	0.372913	0.372913	0.456675	0.414794	no	no	n/a	n/a	n/a	n/a	n/a	n/a	n/a	n/a	n/a
11020709_E05	Extract	2014-11-24	1.04754	1.03182	1.03968	2014-12-05	0.958953	1.11076	1.05438	1.05438	1.02869	1.04153	no	no	n/a	n/a	n/a	n/a	n/a	n/a	n/a	n/a	n/a
11100303_C05	Extract	2014-11-19	1.0966	0.982348	1.03947	2014-12-04	0.947098	0.969431	1.02193	1.02193	1.05117	1.03655	no	no	n/a	n/a	n/a	n/a	n/a	n/a	n/a	n/a	n/a
11100804_D05	Extract	2014-11-19	1.07965	0.999209	1.03943	2014-11-20	1.17326	1.24734	0.982938	0.982938	1.09186	1.0374	no	no	n/a	n/a	n/a	n/a	n/a	n/a	n/a	n/a	n/a
11010216_F05	Extract	2014-11-25	1.06872	1.0092	1.03896	2014-12-05	1.01505	1.04278	1.02546	1.02546	0.872659	0.949059	no	no	n/a	n/a	n/a	n/a	n/a	n/a	n/a	n/a	n/a
11020711_E02	Extract	2014-11-24	1.11366	0.964209	1.03893	2014-12-05	0.946277	1.04321	0.992803	0.992803	0.986349	0.989576	no	no	n/a	n/a	n/a	n/a	n/a	n/a	n/a	n/a	n/a
11090301_B06	Extract	2014-11-19	1.02953	1.04658	1.03806	2014-12-05	1.08308	1.02883	0.891542	0.891542	1.09759	0.994565	no	no	n/a	n/a	n/a	n/a	n/a	n/a	n/a	n/a	n/a
11090204_F08	Extract	2014-11-19	0.98609	1.0877	1.03689	2014-12-04	0.873565	0.976236	0.996047	0.996047	1.11335	1.0547	no	no	n/a	n/a	n/a	n/a	n/a	n/a	n/a	n/a	n/a
11010535_E04	Extract	2014-11-25	1.07316	1.00024	1.0367	2014-12-05	1.02573	1.01496	0.894704	0.894704	0.78911	0.841907	no	no	n/a	n/a	n/a	n/a	n/a	n/a	n/a	n/a	n/a
11010535_C03	Extract	2014-11-25	1.10942	0.963838	1.03663	2014-12-05	1.18068	0.94367	0.821642	0.821642	0.804983	0.813313	no	no	n/a	n/a	n/a	n/a	n/a	n/a	n/a	n/a	n/a
11040303_F03	Extract	2014-11-19	1.08012	0.992847	1.03648	2014-12-05	0.877702	1.01082	0.905903	0.905903	0.826796	0.86635	no	no	n/a	n/a	n/a	n/a	n/a	n/a	n/a	n/a	n/a
11010119_B07	Extract	2014-11-25	1.17115	0.901221	1.03618	2014-12-05	1.00565	1.008	0.951179	0.951179	0.897237	0.924208	no	no	n/a	n/a	n/a	n/a	n/a	n/a	n/a	n/a	n/a
11090206_F03	Extract	2014-11-19	1.00785	1.06373	1.03579	2014-12-04	0.792688	0.9136	0.896726	0.896726	0.924037	0.910382	no	no	n/a	n/a	n/a	n/a	n/a	n/a	n/a	n/a	n/a
11010119_E03	Extract	2014-11-25	1.05873	1.01216	1.03545	2014-12-05	1.0066	0.975775	1.01624	1.01624	1.0344	1.02532	no	no	n/a	n/a	n/a	n/a	n/a	n/a	n/a	n/a	n/a
11020711_B10	Extract	2014-11-24	1.0628	1.00787	1.03534	2014-12-05	1.05503	1.07842	1.00231	1.00231	0.938108	0.970207	no	no	n/a	n/a	n/a	n/a	n/a	n/a	n/a	n/a	n/a
11010535_D09	Extract	2014-11-25	1.08089	0.989722	1.03531	2014-12-05	1.11265	0.893475	0.98549	0.98549	0.825198	0.905344	no	no	n/a	n/a	n/a	n/a	n/a	n/a	n/a	n/a	n/a
11010341_D10	Extract	2014-11-25	0.991653	1.07849	1.03507	2014-12-05	0.965998	1.07341	1.03996	1.03996	1.00914	1.02455	no	no	n/a	n/a	n/a	n/a	n/a	n/a	n/a	n/a	n/a
11100807_B09	Extract	2014-11-19	1.12496	0.945153	1.03506	2014-12-04	1.09768	1.17474	0.885808	0.885808	0.941913	0.913861	no	no	n/a	n/a	n/a	n/a	n/a	n/a	n/a	n/a	n/a
11090201_D11	Extract	2014-11-19	1.07341	0.995974	1.03469	2014-12-04	0.951271	1.05556	0.979421	0.979421	1.0356	1.00751	no	no	n/a	n/a	n/a	n/a	n/a	n/a	n/a	n/a	n/a
11010341_E09	Extract	2014-11-25	1.04337	1.02598	1.03468	2014-12-05	1.03921	1.01056	1.13241	1.13241	1.10784	1.12012	no	no	n/a	n/a	n/a	n/a	n/a	n/a	n/a	n/a	n/a
11100807_B02	Extract	2014-11-19	1.07388	0.99517	1.03453	2014-12-04	0.930805	1.04465	0.99611	0.99611	0.659161	0.827635	no	no	n/a	n/a	n/a	n/a	n/a	n/a	n/a	n/a	n/a
11090302_H09	Extract	2014-11-19	1.05348	1.0144	1.03394	2014-12-05	0.908588	1.00507	0.838907	0.838907	0.886565	0.862736	no	no	n/a	n/a	n/a	n/a	n/a	n/a	n/a	n/a	n/a
11020711_D08	Extract	2014-11-24	1.13832	0.929558	1.03394	2014-12-05	0.896617	1.0005	0.86493	0.86493	1.02869	0.946811	no	no	n/a	n/a	n/a	n/a	n/a	n/a	n/a	n/a	n/a
11090205_H12	Extract	2014-11-19	1.07002	0.997744	1.03388	2014-12-04	0.935566	1.06144	1.07971	1.07971	0.969276	1.02449	no	no	n/a	n/a	n/a	n/a	n/a	n/a	n/a	n/a	n/a
11010535_A07	Extract	2014-11-25	1.00534	1.06225	1.0338	2014-12-05	1.11371	0.985994	0.873745	0.873745	0.703102	0.788424	no	no	n/a	n/a	n/a	n/a	n/a	n/a	n/a	n/a	n/a
11010341_A06	Extract	2014-11-25	1.01859	1.04844	1.03351	2014-12-05	1.13569	0.988982	0.971568	0.971568	1.06319	1.01738	no	no	n/a	n/a	n/a	n/a	n/a	n/a	n/a	n/a	n/a
11010353_D07	Extract	2014-11-25	1.08367	0.982203	1.03294	2014-12-05	1.05816	0.937801	0.915636	0.915636	0.834428	0.875032	no	no	n/a	n/a	n/a	n/a	n/a	n/a	n/a	n/a	n/a
11010535_B09	Extract	2014-11-25	0.947492	1.11828	1.03288	2014-12-05	0.980846	1.05818	1.04085	1.04085	0.751871	0.896363	no	no	n/a	n/a	n/a	n/a	n/a	n/a	n/a	n/a	n/a
11010535_D03	Extract	2014-11-25	1.07453	0.99122	1.03288	2014-12-05	1.07761	0.999105	0.859791	0.859791	0.833853	0.846822	no	no	n/a	n/a	n/a	n/a	n/a	n/a	n/a	n/a	n/a
11010341_E10	Extract	2014-11-25	1.00082	1.06416	1.03249	2014-12-05	1.06808	0.994306	0.933317	0.933317	1.18489	1.0591	no	no	n/a	n/a	n/a	n/a	n/a	n/a	n/a	n/a	n/a
11040303_G06	Extract	2014-11-19	0.990392	1.07449	1.03244	2014-12-05	0.780995	1.07804	0.873732	0.873732	0.862879	0.868305	no	no	n/a	n/a	n/a	n/a	n/a	n/a	n/a	n/a	n/a
11001218_E07	Extract	2014-11-25	1.01266	1.05169	1.03218	2014-12-05	1.31402	1.09173	0.893704	0.893704	1.0114	0.95255	no	no	n/a	n/a	n/a	n/a	n/a	n/a	n/a	n/a	n/a
11040208_D09	Extract	2014-11-19	1.04457	1.01816	1.03137	2014-12-05	1.10294	1.07609	0.927643	0.927643	0.958687	0.943165	no	no	n/a	n/a	n/a	n/a	n/a	n/a	n/a	n/a	n/a
11040303_D08	Extract	2014-11-19	0.939372	1.12318	1.03127	2014-12-05	0.895771	1.00501	0.731573	0.731573	0.684065	0.707819	no	no	n/a	n/a	n/a	n/a	n/a	n/a	n/a	n/a	n/a
11020709_E12	Extract	2014-11-24	0.984271	1.07826	1.03127	2014-12-05	0.784687	1.09593	1.03845	1.03845	1.00789	1.02317	no	no	n/a	n/a	n/a	n/a	n/a	n/a	n/a	n/a	n/a
11100804_E06	Extract	2014-11-19	1.1034	0.958332	1.03087	2014-11-20	1.0837	1.19819	0.995818	0.995818	0.986681	0.99125	no	no	n/a	n/a	n/a	n/a	n/a	n/a	n/a	n/a	n/a
11010341_B10	Extract	2014-11-25	1.05739	1.00349	1.03044	2014-12-05	1.03076	1.04349	1.03829	1.03829	0.931511	0.984902	no	no	n/a	n/a	n/a	n/a	n/a	n/a	n/a	n/a	n/a
11090206_D05	Extract	2014-11-19	0.930243	1.13017	1.03021	2014-12-04	0.93507	1.0159	0.979421	0.979421	1.0076	0.99351	no	no	n/a	n/a	n/a	n/a	n/a	n/a	n/a	n/a	n/a
11090201_G02	Extract	2014-11-19	0.999385	1.06043	1.02991	2014-12-04	0.951271	0.902583	1.03364	1.03364	1.04527	1.03945	no	no	n/a	n/a	n/a	n/a	n/a	n/a	n/a	n/a	n/a
11010341_F03	Extract	2014-11-25	1.05281	1.00648	1.02964	2014-12-05	1.02535	1.09452	0.947845	0.947845	0.980345	0.964095	no	no	n/a	n/a	n/a	n/a	n/a	n/a	n/a	n/a	n/a
11100205_D07	Extract	2014-11-19	1.10138	0.957804	1.02959	2014-11-21	0.993794	1.08989	0.740366	0.740366	0.973229	0.856798	no	no	n/a	n/a	n/a	n/a	n/a	n/a	n/a	n/a	n/a
11090301_B03	Extract	2014-11-19	1.04529	1.01326	1.02927	2014-12-05	0.788382	1.02261	0.916038	0.916038	0.917142	0.91659	no	no	n/a	n/a	n/a	n/a	n/a	n/a	n/a	n/a	n/a
11001218_D09	Extract	2014-11-25	1.00862	1.04954	1.02908	2014-12-05	1.11386	1.09591	1.08046	1.08046	1.10298	1.09172	no	no	n/a	n/a	n/a	n/a	n/a	n/a	n/a	n/a	n/a
11100906_E02	Extract	2014-11-19	1.01549	1.04237	1.02893	2014-12-04	1.03146	0.937206	0.882623	0.882623	0.848621	0.865622	no	no	n/a	n/a	n/a	n/a	n/a	n/a	n/a	n/a	n/a
11010416_D06	Extract	2014-11-25	1.09337	0.964137	1.02875	2014-12-05	1.08308	1.01788	0.74409	0.74409	0.774387	0.759238	no	no	n/a	n/a	n/a	n/a	n/a	n/a	n/a	n/a	n/a
11010353_F11	Extract	2014-11-25	1.09003	0.967433	1.02873	2014-12-05	0.871436	0.988468	0.850648	0.850648	0.863615	0.857132	no	no	n/a	n/a	n/a	n/a	n/a	n/a	n/a	n/a	n/a
11090201_D05	Extract	2014-11-19	1.07242	0.983455	1.02794	2014-12-04	0.981144	1.02895	0.907707	0.907707	1.04596	0.976832	no	no	n/a	n/a	n/a	n/a	n/a	n/a	n/a	n/a	n/a
11020901_G04	Extract	2014-11-24	0.998898	1.0564	1.02765	2014-12-05	1.17044	0.845179	0.832855	0.832855	0.805511	0.819183	no	no	n/a	n/a	n/a	n/a	n/a	n/a	n/a	n/a	n/a
11100805_D05	Extract	2014-11-19	1.10652	0.948672	1.02759	2014-11-20	1.18589	1.24845	0.874422	0.874422	0.98515	0.929786	no	no	n/a	n/a	n/a	n/a	n/a	n/a	n/a	n/a	n/a
11020708_C10	Extract	2014-11-24	1.15535	0.899746	1.02755	2014-12-05	0.94956	1.03802	0.737648	0.737648	0.836804	0.787226	no	no	n/a	n/a	n/a	n/a	n/a	n/a	n/a	n/a	n/a
11040303_D07	Extract	2014-11-19	0.90934	1.14565	1.02749	2014-12-05	0.895218	1.05062	0.763471	0.763471	0.769516	0.766494	no	no	n/a	n/a	n/a	n/a	n/a	n/a	n/a	n/a	n/a
11090304_G06	Extract	2014-11-19	1.02555	1.02865	1.0271	2014-12-05	1.06978	1.05188	0.959115	0.959115	0.960137	0.959626	no	no	n/a	n/a	n/a	n/a	n/a	n/a	n/a	n/a	n/a
11090302_D03	Extract	2014-11-19	0.941302	1.11256	1.02693	2014-12-05	0.939243	1.09174	0.866206	0.866206	0.871909	0.869057	no	no	n/a	n/a	n/a	n/a	n/a	n/a	n/a	n/a	n/a
11010353_E08	Extract	2014-11-25	1.1263	0.927108	1.0267	2014-12-05	1.03273	0.976481	0.902751	0.902751	0.858698	0.880724	no	no	n/a	n/a	n/a	n/a	n/a	n/a	n/a	n/a	n/a
11010402_F04	Extract	2014-11-25	1.09612	0.956917	1.02652	2014-12-05	0.975144	0.912456	0.783548	0.783548	0.699364	0.741456	no	no	n/a	n/a	n/a	n/a	n/a	n/a	n/a	n/a	n/a
11010402_D02	Extract	2014-11-25	1.07924	0.971058	1.02515	2014-12-05	0.972306	0.938025	0.944668	0.944668	0.766882	0.855775	no	no	n/a	n/a	n/a	n/a	n/a	n/a	n/a	n/a	n/a
11010353_B02	Extract	2014-11-25	1.12657	0.923213	1.02489	2014-12-05	1.00497	1.01224	0.972604	0.972604	0.886706	0.929655	no	no	n/a	n/a	n/a	n/a	n/a	n/a	n/a	n/a	n/a
11001218_A06	Extract	2014-11-25	0.97603	1.07361	1.02482	2014-12-05	1.05892	1.00498	0.981069	0.981069	1.12176	1.05141	no	no	n/a	n/a	n/a	n/a	n/a	n/a	n/a	n/a	n/a
11010216_E06	Extract	2014-11-25	1.0512	0.99835	1.02477	2014-12-05	0.999559	1.01611	1.03521	1.03521	1.25257	1.14389	no	no	n/a	n/a	n/a	n/a	n/a	n/a	n/a	n/a	n/a
11100807_B07	Extract	2014-11-19	1.01426	1.03501	1.02463	2014-12-04	1.16303	0.976385	0.912765	0.912765	0.890259	0.901512	no	no	n/a	n/a	n/a	n/a	n/a	n/a	n/a	n/a	n/a
11090301_E12	Extract	2014-11-19	1.10761	0.941571	1.02459	2014-12-05	0.994855	1.08477	0.85805	0.85805	0.954593	0.906321	no	no	n/a	n/a	n/a	n/a	n/a	n/a	n/a	n/a	n/a
11010416_G11	Extract	2014-11-25	1.09502	0.953891	1.02445	2014-12-05	0.933919	0.801452	0.905183	0.905183	0.839058	0.872121	no	no	n/a	n/a	n/a	n/a	n/a	n/a	n/a	n/a	n/a
11040208_B10	Extract	2014-11-19	0.993919	1.05471	1.02431	2014-12-05	0.950531	1.0414	0.791235	0.791235	0.869823	0.830529	no	no	n/a	n/a	n/a	n/a	n/a	n/a	n/a	n/a	n/a
11100804_F09	Extract	2014-11-19	1.0963	0.952292	1.0243	2014-11-20	0.988867	1.0688	1.0405	1.0405	1.05559	1.04804	no	no	n/a	n/a	n/a	n/a	n/a	n/a	n/a	n/a	n/a
11100102_A12	Extract	2014-11-19	1.02176	1.02645	1.02411	2014-11-21	1.14537	1.08902	1.10089	1.10089	1.30776	1.20433	no	no	n/a	n/a	n/a	n/a	n/a	n/a	n/a	n/a	n/a
11010535_F10	Extract	2014-11-25	1.1252	0.922914	1.02405	2014-12-05	0.945322	0.923543	0.965066	0.965066	0.926561	0.945813	no	no	n/a	n/a	n/a	n/a	n/a	n/a	n/a	n/a	n/a
11010416_F07	Extract	2014-11-25	1.06346	0.9843	1.02388	2014-12-05	0.890888	0.882388	0.796139	0.796139	0.700801	0.74847	no	no	n/a	n/a	n/a	n/a	n/a	n/a	n/a	n/a	n/a
11100702_B09	Extract	2014-11-19	1.06344	0.98389	1.02366	2014-11-20	1.23381	1.266	1.01585	1.01585	1.04512	1.03049	no	no	n/a	n/a	n/a	n/a	n/a	n/a	n/a	n/a	n/a
11001218_A02	Extract	2014-11-25	0.991921	1.05495	1.02344	2014-12-05	0.918863	0.895104	0.897871	0.897871	0.911443	0.904657	no	no	n/a	n/a	n/a	n/a	n/a	n/a	n/a	n/a	n/a
11010535_E03	Extract	2014-11-25	1.08312	0.963538	1.02333	2014-12-05	1.05842	1.11207	0.865431	0.865431	0.875146	0.870289	no	no	n/a	n/a	n/a	n/a	n/a	n/a	n/a	n/a	n/a
11100906_B08	Extract	2014-11-19	1.06126	0.98478	1.02302	2014-12-04	1.06183	1.11318	1.03794	1.03794	0.969269	1.0036	no	no	n/a	n/a	n/a	n/a	n/a	n/a	n/a	n/a	n/a
11001218_E11	Extract	2014-11-25	1.07518	0.970749	1.02297	2014-12-05	1.0439	0.944705	1.00088	1.00088	1.01916	1.01002	no	no	n/a	n/a	n/a	n/a	n/a	n/a	n/a	n/a	n/a
11010216_E08	Extract	2014-11-25	1.00162	1.04383	1.02273	2014-12-05	1.04086	1.04534	0.933872	0.933872	0.973226	0.953549	no	no	n/a	n/a	n/a	n/a	n/a	n/a	n/a	n/a	n/a
11001218_B05	Extract	2014-11-25	1.00377	1.04114	1.02245	2014-12-05	1.20498	0.990134	1.07543	1.07543	1.2231	1.14926	no	no	n/a	n/a	n/a	n/a	n/a	n/a	n/a	n/a	n/a
11010341_G05	Extract	2014-11-25	1.06063	0.983755	1.02219	2014-12-05	0.973508	1.07295	1.00785	1.00785	0.946393	0.97712	no	no	n/a	n/a	n/a	n/a	n/a	n/a	n/a	n/a	n/a
11100906_G06	Extract	2014-11-19	1.14878	0.895371	1.02207	2014-12-04	1.24475	1.11566	0.978656	0.978656	1.02643	1.00254	no	no	n/a	n/a	n/a	n/a	n/a	n/a	n/a	n/a	n/a
11010535_G04	Extract	2014-11-25	1.07756	0.966534	1.02205	2014-12-05	0.993822	1.0618	0.858721	0.858721	0.752159	0.80544	no	no	n/a	n/a	n/a	n/a	n/a	n/a	n/a	n/a	n/a
11010535_E09	Extract	2014-11-25	1.11468	0.929235	1.02196	2014-12-05	0.946637	1.00997	0.915369	0.915369	0.8434	0.879384	no	no	n/a	n/a	n/a	n/a	n/a	n/a	n/a	n/a	n/a
11100905_F07	Extract	2014-11-19	1.10012	0.943432	1.02178	2014-12-04	0.965708	0.981131	0.921505	0.921505	0.858667	0.890086	no	no	n/a	n/a	n/a	n/a	n/a	n/a	n/a	n/a	n/a
11090201_C05	Extract	2014-11-19	1.0509	0.992457	1.02168	2014-12-04	0.970195	0.97906	1.07001	1.07001	0.974471	1.02224	no	no	n/a	n/a	n/a	n/a	n/a	n/a	n/a	n/a	n/a
11090501_F04	Extract	2014-11-19	1.08144	0.961783	1.02161	2014-12-05	0.972757	0.985895	0.851856	0.851856	0.879723	0.86579	no	no	n/a	n/a	n/a	n/a	n/a	n/a	n/a	n/a	n/a
11010353_A08	Extract	2014-11-25	0.966876	1.07612	1.0215	2014-12-05	0.995912	0.876519	0.914834	0.914834	0.927424	0.921129	no	no	n/a	n/a	n/a	n/a	n/a	n/a	n/a	n/a	n/a
11010119_D05	Extract	2014-11-25	1.07842	0.964259	1.02134	2014-12-05	0.993682	0.974599	0.944762	0.944762	1.15477	1.04977	no	no	n/a	n/a	n/a	n/a	n/a	n/a	n/a	n/a	n/a
11010402_H05	Extract	2014-11-25	1.16592	0.876268	1.02109	2014-12-05	0.79319	0.917673	0.787023	0.787023	0.802395	0.794709	no	no	n/a	n/a	n/a	n/a	n/a	n/a	n/a	n/a	n/a
11100302_E12	Extract	2014-11-19	1.08921	0.951904	1.02056	2014-11-21	0.966344	1.08989	0.991385	0.991385	1.1453	1.06834	no	no	n/a	n/a	n/a	n/a	n/a	n/a	n/a	n/a	n/a
11020709_D11	Extract	2014-11-24	1.07459	0.966504	1.02055	2014-12-05	0.748638	0.908014	0.665485	0.665485	0.752957	0.709221	no	no	n/a	n/a	n/a	n/a	n/a	n/a	n/a	n/a	n/a
11010119_A03	Extract	2014-11-25	1.08137	0.959655	1.02051	2014-12-05	0.856965	0.96349	0.836785	0.836785	0.958988	0.897886	no	no	n/a	n/a	n/a	n/a	n/a	n/a	n/a	n/a	n/a
11010535_A03	Extract	2014-11-25	0.988738	1.05204	1.02039	2014-12-05	1.07452	1.06565	0.921277	0.921277	0.904045	0.912661	no	no	n/a	n/a	n/a	n/a	n/a	n/a	n/a	n/a	n/a
11090201_G06	Extract	2014-11-19	0.969406	1.07033	1.01987	2014-12-04	0.973911	0.98135	1.05369	1.05369	0.932672	0.993183	no	no	n/a	n/a	n/a	n/a	n/a	n/a	n/a	n/a	n/a
11010353_A04	Extract	2014-11-25	1.06817	0.971357	1.01977	2014-12-05	0.947669	0.835365	1.03684	1.03684	1.01642	1.02663	no	no	n/a	n/a	n/a	n/a	n/a	n/a	n/a	n/a	n/a
11001218_A11	Extract	2014-11-25	1.02641	1.01297	1.01969	2014-12-05	0.955456	0.962775	0.928011	0.928011	1.07482	1.00142	no	no	n/a	n/a	n/a	n/a	n/a	n/a	n/a	n/a	n/a
11010402_B11	Extract	2014-11-25	0.943059	1.09569	1.01937	2014-12-05	1.12875	0.960874	0.906253	0.906253	0.850618	0.878435	no	no	n/a	n/a	n/a	n/a	n/a	n/a	n/a	n/a	n/a
11010216_D02	Extract	2014-11-25	1.07869	0.959385	1.01904	2014-12-05	1.11972	1.04441	0.924122	0.924122	0.911443	0.917782	no	no	n/a	n/a	n/a	n/a	n/a	n/a	n/a	n/a	n/a
11100302_E04	Extract	2014-11-19	1.11952	0.918426	1.01897	2014-11-21	0.976595	1.1075	0.715458	0.715458	1.07642	0.895938	no	no	n/a	n/a	n/a	n/a	n/a	n/a	n/a	n/a	n/a
11040302_E04	Extract	2014-11-19	1.03966	0.998204	1.01893	2014-12-05	0.925793	1.07124	0.750822	0.750822	0.820123	0.785472	no	no	n/a	n/a	n/a	n/a	n/a	n/a	n/a	n/a	n/a
11020711_D05	Extract	2014-11-24	1.05212	0.985196	1.01866	2014-12-05	0.832346	1.07149	0.917214	0.917214	0.958374	0.937794	no	no	n/a	n/a	n/a	n/a	n/a	n/a	n/a	n/a	n/a
11010353_B07	Extract	2014-11-25	1.0283	1.00899	1.01864	2014-12-05	1.22949	0.957928	0.918336	0.918336	1.14968	1.03401	no	no	n/a	n/a	n/a	n/a	n/a	n/a	n/a	n/a	n/a
11010216_B10	Extract	2014-11-25	1.02829	1.00893	1.01861	2014-12-05	1.01644	0.977158	0.894815	0.894815	0.954478	0.924647	no	no	n/a	n/a	n/a	n/a	n/a	n/a	n/a	n/a	n/a
11040208_G07	Extract	2014-11-19	0.932102	1.10463	1.01837	2014-12-05	0.974438	1.03993	0.807444	0.807444	0.907748	0.857596	no	no	n/a	n/a	n/a	n/a	n/a	n/a	n/a	n/a	n/a
11001218_C04	Extract	2014-11-25	1.07167	0.964528	1.0181	2014-12-05	1.04837	1.06018	0.973791	0.973791	1.08423	1.02901	no	no	n/a	n/a	n/a	n/a	n/a	n/a	n/a	n/a	n/a
11100102_A10	Extract	2014-11-19	1.05604	0.98013	1.01809	2014-11-21	1.031	1.09957	1.21358	1.21358	1.18047	1.19702	no	no	n/a	n/a	n/a	n/a	n/a	n/a	n/a	n/a	n/a
11100804_G09	Extract	2014-11-19	0.980611	1.0548	1.01771	2014-11-20	1.2083	1.13523	1.0236	1.0236	1.05681	1.04021	no	no	n/a	n/a	n/a	n/a	n/a	n/a	n/a	n/a	n/a
11010341_B12	Extract	2014-11-25	1.15576	0.879571	1.01767	2014-12-05	0.962476	0.939358	0.915733	0.915733	0.970004	0.942869	no	no	n/a	n/a	n/a	n/a	n/a	n/a	n/a	n/a	n/a
11010216_C07	Extract	2014-11-25	1.00433	1.03058	1.01746	2014-12-05	1.06995	1.14535	1.01288	1.01288	0.992005	1.00244	no	no	n/a	n/a	n/a	n/a	n/a	n/a	n/a	n/a	n/a
11090204_D11	Extract	2014-11-19	1.02792	1.00677	1.01734	2014-12-04	0.932841	1.06322	0.990713	0.990713	1.03075	1.01073	no	no	n/a	n/a	n/a	n/a	n/a	n/a	n/a	n/a	n/a
11001218_E03	Extract	2014-11-25	1.05066	0.983486	1.01707	2014-12-05	1.0615	0.980408	1.00785	1.00785	0.950903	0.979375	no	no	n/a	n/a	n/a	n/a	n/a	n/a	n/a	n/a	n/a
11020711_B04	Extract	2014-11-24	1.09968	0.934377	1.01703	2014-12-05	0.810495	1.03321	0.763269	0.763269	0.925525	0.844397	no	no	n/a	n/a	n/a	n/a	n/a	n/a	n/a	n/a	n/a
11010535_G02	Extract	2014-11-25	1.07814	0.955719	1.01693	2014-12-05	0.997202	1.0394	0.933387	0.933387	0.863615	0.898501	no	no	n/a	n/a	n/a	n/a	n/a	n/a	n/a	n/a	n/a
11020709_C06	Extract	2014-11-24	1.16103	0.872271	1.01665	2014-12-05	1.18818	1.18219	0.858997	0.858997	0.943239	0.901118	no	no	n/a	n/a	n/a	n/a	n/a	n/a	n/a	n/a	n/a
11090201_F07	Extract	2014-11-19	1.03203	1.00126	1.01665	2014-12-04	0.883523	0.921512	0.834401	0.834401	0.93336	0.883881	no	no	n/a	n/a	n/a	n/a	n/a	n/a	n/a	n/a	n/a
11040303_F06	Extract	2014-11-19	0.945062	1.08803	1.01655	2014-12-05	0.928284	0.969823	0.780502	0.780502	0.801341	0.790922	no	no	n/a	n/a	n/a	n/a	n/a	n/a	n/a	n/a	n/a
11100302_H11	Extract	2014-11-19	1.08743	0.945375	1.0164	2014-11-21	0.991561	1.03006	0.99269	0.99269	1.0608	1.02675	no	no	n/a	n/a	n/a	n/a	n/a	n/a	n/a	n/a	n/a
11040209_E03	Extract	2014-11-19	0.96036	1.07182	1.01609	2014-12-05	1.01893	1.05206	0.845119	0.845119	0.945341	0.89523	no	no	n/a	n/a	n/a	n/a	n/a	n/a	n/a	n/a	n/a
11010416_C06	Extract	2014-11-25	1.0834	0.94787	1.01563	2014-12-05	0.90954	1.14445	0.770395	0.770395	0.807312	0.788853	no	no	n/a	n/a	n/a	n/a	n/a	n/a	n/a	n/a	n/a
11010535_H07	Extract	2014-11-25	1.08615	0.943975	1.01506	2014-12-05	1.02313	0.890304	0.854417	0.854417	0.750433	0.802425	no	no	n/a	n/a	n/a	n/a	n/a	n/a	n/a	n/a	n/a
11090201_G05	Extract	2014-11-19	0.984143	1.0459	1.01502	2014-12-04	0.944285	1.08831	1.0142	1.0142	1.01868	1.01644	no	no	n/a	n/a	n/a	n/a	n/a	n/a	n/a	n/a	n/a
11010416_F10	Extract	2014-11-25	1.01225	1.0177	1.01498	2014-12-05	0.956208	0.835814	0.846905	0.846905	0.822322	0.834614	no	no	n/a	n/a	n/a	n/a	n/a	n/a	n/a	n/a	n/a
11090205_C07	Extract	2014-11-19	1.03833	0.991583	1.01496	2014-12-04	0.994842	0.945299	0.919279	0.919279	1.02869	0.973984	no	no	n/a	n/a	n/a	n/a	n/a	n/a	n/a	n/a	n/a
11100302_B04	Extract	2014-11-19	1.20713	0.822449	1.01479	2014-11-21	0.999552	1.0888	0.544126	0.544126	0.994422	0.769274	no	no	n/a	n/a	n/a	n/a	n/a	n/a	n/a	n/a	n/a
11010416_E07	Extract	2014-11-25	1.1119	0.917491	1.01469	2014-12-05	1.02444	0.909082	0.766358	0.766358	0.7184	0.742379	no	no	n/a	n/a	n/a	n/a	n/a	n/a	n/a	n/a	n/a
11090201_D04	Extract	2014-11-19	0.965775	1.06329	1.01453	2014-12-04	0.918127	0.866813	0.907395	0.907395	0.937144	0.922269	no	no	n/a	n/a	n/a	n/a	n/a	n/a	n/a	n/a	n/a
11100206_E11	Extract	2014-11-19	1.14627	0.882437	1.01435	2014-11-21	1.00404	1.07031	0.804074	0.804074	0.886017	0.845045	no	no	n/a	n/a	n/a	n/a	n/a	n/a	n/a	n/a	n/a
11010216_E10	Extract	2014-11-25	1.05902	0.969672	1.01435	2014-12-05	0.946547	1.05972	0.891176	0.891176	1.06287	0.977024	no	no	n/a	n/a	n/a	n/a	n/a	n/a	n/a	n/a	n/a
11010402_F06	Extract	2014-11-25	1.04102	0.987595	1.01431	2014-12-05	0.990185	0.834015	0.800978	0.800978	0.659537	0.730257	no	no	n/a	n/a	n/a	n/a	n/a	n/a	n/a	n/a	n/a
11010119_D12	Extract	2014-11-25	1.02183	1.00675	1.01429	2014-12-05	0.995338	1.04928	0.947012	0.947012	0.920204	0.933608	no	no	n/a	n/a	n/a	n/a	n/a	n/a	n/a	n/a	n/a
11090205_E02	Extract	2014-11-19	1.08526	0.943012	1.01414	2014-12-04	0.818574	0.957308	0.973151	0.973151	0.961673	0.967412	no	no	n/a	n/a	n/a	n/a	n/a	n/a	n/a	n/a	n/a
11100903_D09	Extract	2014-11-19	1.0755	0.952725	1.01411	2014-12-04	0.999485	0.924825	0.796961	0.796961	0.902726	0.849844	no	no	n/a	n/a	n/a	n/a	n/a	n/a	n/a	n/a	n/a
11010416_B04	Extract	2014-11-25	1.00947	1.0186	1.01404	2014-12-05	0.999782	0.872224	0.919138	0.919138	0.768319	0.843729	no	no	n/a	n/a	n/a	n/a	n/a	n/a	n/a	n/a	n/a
11090301_B02	Extract	2014-11-19	1.05414	0.973728	1.01394	2014-12-05	0.922367	1.03413	0.950679	0.950679	1.03763	0.994156	no	no	n/a	n/a	n/a	n/a	n/a	n/a	n/a	n/a	n/a
11010416_C04	Extract	2014-11-25	1.03659	0.990022	1.01331	2014-12-05	0.966063	0.989165	0.743555	0.743555	0.740915	0.742235	no	no	n/a	n/a	n/a	n/a	n/a	n/a	n/a	n/a	n/a
11100304_H02	Extract	2014-11-19	1.05322	0.97227	1.01274	2014-12-04	1.04223	1.03614	0.951275	0.951275	0.976838	0.964057	no	no	n/a	n/a	n/a	n/a	n/a	n/a	n/a	n/a	n/a
11100303_E02	Extract	2014-11-19	1.16377	0.861545	1.01266	2014-12-04	1.05052	0.978544	1.08846	1.08846	1.02517	1.05682	no	no	n/a	n/a	n/a	n/a	n/a	n/a	n/a	n/a	n/a
11010535_A06	Extract	2014-11-25	1.09059	0.934328	1.01246	2014-12-05	1.20924	1.06362	0.951913	0.951913	0.996466	0.974189	no	no	n/a	n/a	n/a	n/a	n/a	n/a	n/a	n/a	n/a
11100702_G09	Extract	2014-11-19	1.0097	1.01471	1.01221	2014-11-20	1.09323	1.35317	1.04936	1.04936	1.2707	1.16003	no	no	n/a	n/a	n/a	n/a	n/a	n/a	n/a	n/a	n/a
11090201_B03	Extract	2014-11-19	0.969165	1.0547	1.01194	2014-12-04	0.98263	0.996971	0.940897	0.940897	0.953382	0.947139	no	no	n/a	n/a	n/a	n/a	n/a	n/a	n/a	n/a	n/a
11001218_D04	Extract	2014-11-25	1.00486	1.01865	1.01176	2014-12-05	1.13921	1.07991	1.0154	1.0154	1.14118	1.07829	no	no	n/a	n/a	n/a	n/a	n/a	n/a	n/a	n/a	n/a
11090501_D10	Extract	2014-11-19	1.03619	0.987065	1.01163	2014-12-05	0.882448	1.01299	0.840869	0.840869	0.961759	0.901314	no	no	n/a	n/a	n/a	n/a	n/a	n/a	n/a	n/a	n/a
11010402_C04	Extract	2014-11-25	1.07619	0.946671	1.01143	2014-12-05	0.982935	0.845754	0.798839	0.798839	0.709169	0.754004	no	no	n/a	n/a	n/a	n/a	n/a	n/a	n/a	n/a	n/a
11040302_B10	Extract	2014-11-19	1.07441	0.946174	1.01029	2014-12-05	1.03479	1.07319	0.879783	0.879783	1.03574	0.957763	no	no	n/a	n/a	n/a	n/a	n/a	n/a	n/a	n/a	n/a
11100302_C05	Extract	2014-11-19	1.07285	0.947698	1.01027	2014-11-21	1.03075	1.04942	0.880653	0.880653	0.925296	0.902975	no	no	n/a	n/a	n/a	n/a	n/a	n/a	n/a	n/a	n/a
11100205_A08	Extract	2014-11-19	1.04497	0.974857	1.00991	2014-11-21	1.00628	1.11542	1.00452	1.00452	1.00948	1.007	no	no	n/a	n/a	n/a	n/a	n/a	n/a	n/a	n/a	n/a
11010535_B02	Extract	2014-11-25	1.09169	0.927707	1.0097	2014-12-05	0.956466	1.11274	0.971802	0.971802	0.774387	0.873095	no	no	n/a	n/a	n/a	n/a	n/a	n/a	n/a	n/a	n/a
11001218_B10	Extract	2014-11-25	0.980077	1.03923	1.00965	2014-12-05	0.935748	0.999193	0.979096	0.979096	0.998802	0.988949	no	no	n/a	n/a	n/a	n/a	n/a	n/a	n/a	n/a	n/a
11001218_B03	Extract	2014-11-25	1.05093	0.968325	1.00963	2014-12-05	0.963666	0.988751	0.924955	0.924955	0.974192	0.949574	no	no	n/a	n/a	n/a	n/a	n/a	n/a	n/a	n/a	n/a
11020709_E02	Extract	2014-11-24	0.982321	1.03645	1.00939	2014-12-05	0.843044	1.13406	1.13219	1.13219	1.00302	1.0676	no	no	n/a	n/a	n/a	n/a	n/a	n/a	n/a	n/a	n/a
11100701_C06	Extract	2014-11-19	1.21663	0.802077	1.00935	2014-12-04	1.00459	0.978067	0.984391	0.984391	1.05089	1.01764	no	no	n/a	n/a	n/a	n/a	n/a	n/a	n/a	n/a	n/a
11010119_D03	Extract	2014-11-25	1.03153	0.986717	1.00912	2014-12-05	1.06526	1.12004	0.99418	0.99418	1.11431	1.05425	no	no	n/a	n/a	n/a	n/a	n/a	n/a	n/a	n/a	n/a
11010119_E04	Extract	2014-11-25	1.06036	0.9575	1.00893	2014-12-05	0.915108	1.13698	1.06902	1.06902	1.1156	1.09231	no	no	n/a	n/a	n/a	n/a	n/a	n/a	n/a	n/a	n/a
11090206_A06	Extract	2014-11-19	0.913558	1.104	1.00878	2014-12-04	0.946787	0.928152	0.97599	0.97599	1.03213	1.00406	no	no	n/a	n/a	n/a	n/a	n/a	n/a	n/a	n/a	n/a
11001218_A03	Extract	2014-11-25	1.02534	0.99186	1.0086	2014-12-05	0.9545	0.935186	0.863842	0.863842	0.989074	0.926458	no	no	n/a	n/a	n/a	n/a	n/a	n/a	n/a	n/a	n/a
11100206_C10	Extract	2014-11-19	1.17548	0.841594	1.00854	2014-11-21	1.12688	1.05864	0.752951	0.752951	1.02704	0.889997	no	no	n/a	n/a	n/a	n/a	n/a	n/a	n/a	n/a	n/a
11090301_D08	Extract	2014-11-19	1.01535	1.00154	1.00845	2014-12-05	1.12971	1.1227	0.866766	0.866766	0.913251	0.890009	no	no	n/a	n/a	n/a	n/a	n/a	n/a	n/a	n/a	n/a
11020711_E06	Extract	2014-11-24	1.09357	0.923257	1.00841	2014-12-05	0.827759	0.995499	0.924092	0.924092	0.856789	0.890441	no	no	n/a	n/a	n/a	n/a	n/a	n/a	n/a	n/a	n/a
11001218_A07	Extract	2014-11-25	1.0512	0.965336	1.00827	2014-12-05	0.964599	1.05091	0.962901	0.962901	1.01691	0.989903	no	no	n/a	n/a	n/a	n/a	n/a	n/a	n/a	n/a	n/a
11001218_F04	Extract	2014-11-25	1.06331	0.952626	1.00797	2014-12-05	0.982184	1.05463	0.973513	0.973513	0.937663	0.955588	no	no	n/a	n/a	n/a	n/a	n/a	n/a	n/a	n/a	n/a
11040208_C12	Extract	2014-11-19	0.994504	1.02119	1.00785	2014-12-05	0.983624	0.993362	0.92047	0.92047	1.04909	0.98478	no	no	n/a	n/a	n/a	n/a	n/a	n/a	n/a	n/a	n/a
11020711_E09	Extract	2014-11-24	1.06869	0.946977	1.00784	2014-12-05	0.904053	1.14406	0.990653	0.990653	0.96838	0.979516	no	no	n/a	n/a	n/a	n/a	n/a	n/a	n/a	n/a	n/a
11090301_G10	Extract	2014-11-19	1.01068	1.00499	1.00783	2014-12-05	0.984172	0.93048	0.952081	0.952081	0.926934	0.939507	no	no	n/a	n/a	n/a	n/a	n/a	n/a	n/a	n/a	n/a
11100305_H10	Extract	2014-11-19	0.999959	1.01529	1.00762	2014-12-04	1.05629	1.03831	0.87156	0.87156	1.06488	0.968222	no	no	n/a	n/a	n/a	n/a	n/a	n/a	n/a	n/a	n/a
11040303_F04	Extract	2014-11-19	0.902091	1.11284	1.00746	2014-12-05	0.916053	1.03193	0.964497	0.964497	0.843765	0.904131	no	no	n/a	n/a	n/a	n/a	n/a	n/a	n/a	n/a	n/a
11090204_C08	Extract	2014-11-19	1.04824	0.966522	1.00738	2014-12-04	1.00282	1.00361	1.0769	1.0769	1.00416	1.04053	no	no	n/a	n/a	n/a	n/a	n/a	n/a	n/a	n/a	n/a
11100206_D11	Extract	2014-11-19	1.03283	0.980757	1.00679	2014-11-21	0.978828	0.908224	0.776267	0.776267	0.911093	0.84368	no	no	n/a	n/a	n/a	n/a	n/a	n/a	n/a	n/a	n/a
11010119_E05	Extract	2014-11-25	1.06521	0.948022	1.00662	2014-12-05	0.979385	1.02957	1.05841	1.05841	1.12208	1.09024	no	no	n/a	n/a	n/a	n/a	n/a	n/a	n/a	n/a	n/a
11090201_E02	Extract	2014-11-19	0.98972	1.02326	1.00649	2014-12-04	0.87458	1.05017	0.997295	0.997295	0.953726	0.975511	no	no	n/a	n/a	n/a	n/a	n/a	n/a	n/a	n/a	n/a
11100905_C09	Extract	2014-11-19	1.03237	0.980219	1.0063	2014-12-04	0.918547	0.985855	0.87283	0.87283	0.845292	0.859061	no	no	n/a	n/a	n/a	n/a	n/a	n/a	n/a	n/a	n/a
11040302_A04	Extract	2014-11-19	1.00943	1.00176	1.00559	2014-12-05	0.924963	0.907744	1.00412	1.00412	0.863482	0.933799	no	no	n/a	n/a	n/a	n/a	n/a	n/a	n/a	n/a	n/a
11010216_C06	Extract	2014-11-25	0.987071	1.02407	1.00557	2014-12-05	1.09931	1.14929	0.969346	0.969346	0.815418	0.892382	no	no	n/a	n/a	n/a	n/a	n/a	n/a	n/a	n/a	n/a
11010353_A05	Extract	2014-11-25	1.00394	1.00686	1.0054	2014-12-05	0.961936	0.905462	0.982282	0.982282	0.845413	0.913847	no	no	n/a	n/a	n/a	n/a	n/a	n/a	n/a	n/a	n/a
11090206_B08	Extract	2014-11-19	1.00035	1.01029	1.00532	2014-12-04	0.907922	1.05683	0.949974	0.949974	0.969964	0.959969	no	no	n/a	n/a	n/a	n/a	n/a	n/a	n/a	n/a	n/a
11010535_E02	Extract	2014-11-25	1.07426	0.936156	1.00521	2014-12-05	1.00886	1.02989	0.900879	0.900879	0.884118	0.892499	no	no	n/a	n/a	n/a	n/a	n/a	n/a	n/a	n/a	n/a
11010535_C09	Extract	2014-11-25	1.04408	0.965635	1.00486	2014-12-05	0.905128	1.03916	0.936862	0.936862	0.793739	0.865301	no	no	n/a	n/a	n/a	n/a	n/a	n/a	n/a	n/a	n/a
11100303_H04	Extract	2014-11-19	1.1349	0.874808	1.00486	2014-12-04	1.29778	0.944954	1.00177	1.00177	0.880144	0.940959	no	no	n/a	n/a	n/a	n/a	n/a	n/a	n/a	n/a	n/a
11100805_B08	Extract	2014-11-19	1.07852	0.931154	1.00484	2014-11-20	1.30456	1.28093	1.12328	1.12328	1.13558	1.12943	no	no	n/a	n/a	n/a	n/a	n/a	n/a	n/a	n/a	n/a
11010353_G04	Extract	2014-11-25	0.972686	1.03697	1.00483	2014-12-05	1.09941	0.877194	0.982282	0.982282	0.856973	0.919627	no	no	n/a	n/a	n/a	n/a	n/a	n/a	n/a	n/a	n/a
11010216_D09	Extract	2014-11-25	0.954217	1.05441	1.00432	2014-12-05	0.951001	1.0407	0.846813	0.846813	1.97953	1.41317	no	no	n/a	n/a	n/a	n/a	n/a	n/a	n/a	n/a	n/a
11010416_E09	Extract	2014-11-25	1.01696	0.99152	1.00424	2014-12-05	1.0278	0.866556	0.8179	0.8179	0.72878	0.77334	no	no	n/a	n/a	n/a	n/a	n/a	n/a	n/a	n/a	n/a
11010535_H08	Extract	2014-11-25	1.01916	0.989123	1.00414	2014-12-05	0.833848	0.866556	0.766091	0.766091	0.755926	0.761008	no	no	n/a	n/a	n/a	n/a	n/a	n/a	n/a	n/a	n/a
11090201_B05	Extract	2014-11-19	1.11889	0.888935	1.00391	2014-12-04	1.09526	0.997225	1.02705	1.02705	0.95235	0.989702	no	no	n/a	n/a	n/a	n/a	n/a	n/a	n/a	n/a	n/a
11090205_D02	Extract	2014-11-19	1.05646	0.950921	1.00369	2014-12-04	0.938068	0.910267	0.875452	0.875452	0.976879	0.926165	no	no	n/a	n/a	n/a	n/a	n/a	n/a	n/a	n/a	n/a
11010119_F06	Extract	2014-11-25	1.00945	0.997542	1.00349	2014-12-05	0.948413	1.0029	0.863564	0.863564	0.917595	0.89058	no	no	n/a	n/a	n/a	n/a	n/a	n/a	n/a	n/a	n/a
11010535_E08	Extract	2014-11-25	1.06068	0.945473	1.00308	2014-12-05	0.932113	1.01224	0.757242	0.757242	0.605908	0.681575	no	no	n/a	n/a	n/a	n/a	n/a	n/a	n/a	n/a	n/a
11090206_C12	Extract	2014-11-19	1.05694	0.948496	1.00272	2014-12-04	0.933337	1.03048	0.913321	0.913321	0.955102	0.934212	no	no	n/a	n/a	n/a	n/a	n/a	n/a	n/a	n/a	n/a
11010535_H04	Extract	2014-11-25	0.992317	1.01288	1.0026	2014-12-05	0.961936	0.861361	0.762054	0.762054	0.738327	0.750191	no	no	n/a	n/a	n/a	n/a	n/a	n/a	n/a	n/a	n/a
11010119_H03	Extract	2014-11-25	0.997844	1.00729	1.00257	2014-12-05	1.11291	0.937975	1.14108	1.14108	0.988108	1.06459	no	no	n/a	n/a	n/a	n/a	n/a	n/a	n/a	n/a	n/a
11010535_D07	Extract	2014-11-25	0.979872	1.02522	1.00255	2014-12-05	1.00394	1.09057	0.967231	0.967231	0.781892	0.874561	no	no	n/a	n/a	n/a	n/a	n/a	n/a	n/a	n/a	n/a
11010535_A05	Extract	2014-11-25	1.06649	0.938552	1.00252	2014-12-05	0.990701	0.945941	0.835357	0.835357	0.966704	0.90103	no	no	n/a	n/a	n/a	n/a	n/a	n/a	n/a	n/a	n/a
11010341_A07	Extract	2014-11-25	1.05093	0.953703	1.00232	2014-12-05	1.14227	0.914327	0.955651	0.955651	1.03082	0.993236	no	no	n/a	n/a	n/a	n/a	n/a	n/a	n/a	n/a	n/a
11001218_F02	Extract	2014-11-25	0.957459	1.04709	1.00227	2014-12-05	1.00963	1.03559	1.02852	1.02852	1.02824	1.02838	no	no	n/a	n/a	n/a	n/a	n/a	n/a	n/a	n/a	n/a
11040302_E11	Extract	2014-11-19	0.933077	1.07127	1.00217	2014-12-05	1.10073	0.997245	0.783267	0.783267	0.8553	0.819283	no	no	n/a	n/a	n/a	n/a	n/a	n/a	n/a	n/a	n/a
11010535_A04	Extract	2014-11-25	1.00837	0.995744	1.00206	2014-12-05	1.16301	1.0016	0.925046	0.925046	0.889581	0.907314	no	no	n/a	n/a	n/a	n/a	n/a	n/a	n/a	n/a	n/a
11001218_A10	Extract	2014-11-25	0.946151	1.05711	1.00163	2014-12-05	0.977962	1.03907	0.935011	0.935011	0.998802	0.966907	no	no	n/a	n/a	n/a	n/a	n/a	n/a	n/a	n/a	n/a
11020708_B06	Extract	2014-11-24	0.975127	1.02805	1.00159	2014-12-05	0.818344	1.02897	0.838788	0.838788	0.871925	0.855356	no	no	n/a	n/a	n/a	n/a	n/a	n/a	n/a	n/a	n/a
11010341_G12	Extract	2014-11-25	0.945856	1.05684	1.00135	2014-12-05	0.923084	0.965564	0.844869	0.844869	0.964818	0.904843	no	no	n/a	n/a	n/a	n/a	n/a	n/a	n/a	n/a	n/a
11090302_G07	Extract	2014-11-19	0.999375	1.00291	1.00114	2014-12-05	0.932814	1.03723	0.749697	0.749697	0.886889	0.818293	no	no	n/a	n/a	n/a	n/a	n/a	n/a	n/a	n/a	n/a
11090201_A05	Extract	2014-11-19	1.09252	0.909146	1.00083	2014-12-04	1.02075	1.09215	1.05307	1.05307	0.928509	0.990789	no	no	n/a	n/a	n/a	n/a	n/a	n/a	n/a	n/a	n/a
11040208_D05	Extract	2014-11-19	0.975853	1.02564	1.00075	2014-12-05	0.966662	1.08192	0.737624	0.737624	0.887427	0.812526	no	no	n/a	n/a	n/a	n/a	n/a	n/a	n/a	n/a	n/a
11010535_D08	Extract	2014-11-25	1.04962	0.951794	1.0007	2014-12-05	1.03636	0.926489	0.875884	0.875884	0.797477	0.836681	no	no	n/a	n/a	n/a	n/a	n/a	n/a	n/a	n/a	n/a
11010353_G10	Extract	2014-11-25	0.936148	1.06468	1.00041	2014-12-05	0.895299	0.880117	0.947074	0.947074	0.817117	0.882096	no	no	n/a	n/a	n/a	n/a	n/a	n/a	n/a	n/a	n/a
11010216_F08	Extract	2014-11-25	0.983319	1.01677	1.00004	2014-12-05	1.00073	1.04488	0.924955	0.924955	0.893984	0.909469	no	no	n/a	n/a	n/a	n/a	n/a	n/a	n/a	n/a	n/a
11100205_G06	Extract	2014-11-19	1.23437	0.764406	0.999387	2014-11-21	0.744632	1.25392	1.10115	1.10115	1.0965	1.09883	no	no	n/a	n/a	n/a	n/a	n/a	n/a	n/a	n/a	n/a
11040208_F08	Extract	2014-11-19	0.997057	1.0014	0.99923	2014-12-05	0.846573	1.02828	0.709861	0.709861	0.78558	0.74772	no	no	n/a	n/a	n/a	n/a	n/a	n/a	n/a	n/a	n/a
11100804_C07	Extract	2014-11-19	1.05411	0.944233	0.99917	2014-11-20	1.27573	1.17734	1.11927	1.11927	1.05589	1.08758	no	no	n/a	n/a	n/a	n/a	n/a	n/a	n/a	n/a	n/a
11010119_B06	Extract	2014-11-25	1.01373	0.984293	0.999014	2014-12-05	1.08193	1.07364	0.935845	0.935845	0.984242	0.960043	no	no	n/a	n/a	n/a	n/a	n/a	n/a	n/a	n/a	n/a
11010535_F03	Extract	2014-11-25	0.983479	1.01441	0.998944	2014-12-05	0.866766	0.943895	0.884759	0.884759	0.816542	0.850651	no	no	n/a	n/a	n/a	n/a	n/a	n/a	n/a	n/a	n/a
11090201_H11	Extract	2014-11-19	1.18883	0.808967	0.998897	2014-12-04	0.968684	0.933546	0.858202	0.858202	0.9679	0.913051	no	no	n/a	n/a	n/a	n/a	n/a	n/a	n/a	n/a	n/a
11090301_A09	Extract	2014-11-19	0.964787	1.0321	0.998444	2014-12-05	0.712184	1.10662	0.850735	0.850735	1.01581	0.933273	no	no	n/a	n/a	n/a	n/a	n/a	n/a	n/a	n/a	n/a
11010535_G05	Extract	2014-11-25	1.02885	0.968032	0.998443	2014-12-05	0.855105	0.978528	0.840997	0.840997	0.798915	0.819956	no	no	n/a	n/a	n/a	n/a	n/a	n/a	n/a	n/a	n/a
11090205_G05	Extract	2014-11-19	1.06735	0.929378	0.998363	2014-12-04	0.92437	0.88854	0.928357	0.928357	1.03526	0.981808	no	no	n/a	n/a	n/a	n/a	n/a	n/a	n/a	n/a	n/a
11090205_A06	Extract	2014-11-19	0.974238	1.02237	0.998303	2014-12-04	1.07158	1.01641	0.967224	0.967224	1.02938	0.9983	no	no	n/a	n/a	n/a	n/a	n/a	n/a	n/a	n/a	n/a
11010341_H04	Extract	2014-11-25	1.02695	0.969133	0.99804	2014-12-05	0.920496	0.78576	0.871092	0.871092	0.86844	0.869766	no	no	n/a	n/a	n/a	n/a	n/a	n/a	n/a	n/a	n/a
11090501_C02	Extract	2014-11-19	1.081	0.914691	0.997845	2014-12-05	0.975356	1.06989	0.875791	0.875791	0.967628	0.921709	no	no	n/a	n/a	n/a	n/a	n/a	n/a	n/a	n/a	n/a
11010216_C02	Extract	2014-11-25	0.97737	1.01811	0.997742	2014-12-05	0.931994	1.05647	0.90151	0.90151	0.872015	0.886762	no	no	n/a	n/a	n/a	n/a	n/a	n/a	n/a	n/a	n/a
11010341_G04	Extract	2014-11-25	1.01859	0.976431	0.997508	2014-12-05	0.995104	1.10008	0.958457	0.958457	1.00363	0.981045	no	no	n/a	n/a	n/a	n/a	n/a	n/a	n/a	n/a	n/a
11020711_D06	Extract	2014-11-24	0.999114	0.994855	0.996985	2014-12-05	0.766554	1.04148	0.68612	0.68612	0.882696	0.784408	no	no	n/a	n/a	n/a	n/a	n/a	n/a	n/a	n/a	n/a
11020709_C04	Extract	2014-11-24	1.02091	0.973013	0.996963	2014-12-05	1.18094	1.23401	0.937163	0.937163	0.984536	0.96085	no	no	n/a	n/a	n/a	n/a	n/a	n/a	n/a	n/a	n/a
11001218_F10	Extract	2014-11-25	0.988706	1.00514	0.996921	2014-12-05	0.961776	0.987368	0.98218	0.98218	0.907577	0.944879	no	no	n/a	n/a	n/a	n/a	n/a	n/a	n/a	n/a	n/a
11010119_C03	Extract	2014-11-25	0.951242	1.04222	0.996729	2014-12-05	1.00049	0.968123	0.840396	0.840396	0.867473	0.853935	no	no	n/a	n/a	n/a	n/a	n/a	n/a	n/a	n/a	n/a
11010341_F11	Extract	2014-11-25	1.0326	0.959924	0.996262	2014-12-05	0.990883	1.09846	1.0101	1.0101	1.03147	1.02078	no	no	n/a	n/a	n/a	n/a	n/a	n/a	n/a	n/a	n/a
11040303_F07	Extract	2014-11-19	0.914446	1.07751	0.995979	2014-12-05	0.885754	1.01422	0.843476	0.843476	0.878036	0.860756	no	no	n/a	n/a	n/a	n/a	n/a	n/a	n/a	n/a	n/a
11010353_E07	Extract	2014-11-25	1.07729	0.913567	0.995427	2014-12-05	0.93704	1.05434	0.979849	0.979849	0.81335	0.8966	no	no	n/a	n/a	n/a	n/a	n/a	n/a	n/a	n/a	n/a
11020711_B07	Extract	2014-11-24	1.10995	0.880658	0.995304	2014-12-05	0.802189	1.10884	0.680424	0.680424	0.857555	0.768989	no	no	n/a	n/a	n/a	n/a	n/a	n/a	n/a	n/a	n/a
11100302_F11	Extract	2014-11-19	1.10513	0.885366	0.995249	2014-11-21	0.990816	1.11983	0.990601	0.990601	1.00474	0.997671	no	no	n/a	n/a	n/a	n/a	n/a	n/a	n/a	n/a	n/a
11010216_B08	Extract	2014-11-25	0.955557	1.03381	0.994685	2014-12-05	1.05189	1.03791	0.955095	0.955095	0.850658	0.902877	no	no	n/a	n/a	n/a	n/a	n/a	n/a	n/a	n/a	n/a
11040208_D02	Extract	2014-11-19	0.984292	1.00498	0.994633	2014-12-05	1.04314	1.10401	1.01211	1.01211	0.892892	0.952502	no	no	n/a	n/a	n/a	n/a	n/a	n/a	n/a	n/a	n/a
11090301_D02	Extract	2014-11-19	1.10118	0.888062	0.99462	2014-12-05	0.944939	0.994053	0.912086	0.912086	0.96338	0.937733	no	no	n/a	n/a	n/a	n/a	n/a	n/a	n/a	n/a	n/a
11010119_F02	Extract	2014-11-25	0.99838	0.990245	0.994312	2014-12-05	1.0209	0.948877	0.874731	0.874731	0.8303	0.852516	no	no	n/a	n/a	n/a	n/a	n/a	n/a	n/a	n/a	n/a
11020711_B02	Extract	2014-11-24	0.996926	0.991496	0.994211	2014-12-05	0.779447	0.941084	0.677587	0.677587	0.780396	0.728991	no	no	n/a	n/a	n/a	n/a	n/a	n/a	n/a	n/a	n/a
11020711_C04	Extract	2014-11-24	0.989082	0.999069	0.994075	2014-12-05	1.08173	1.11076	0.805555	0.805555	1.05077	0.928163	no	no	n/a	n/a	n/a	n/a	n/a	n/a	n/a	n/a	n/a
11010402_A04	Extract	2014-11-25	0.973512	1.01411	0.99381	2014-12-05	1.02651	0.896399	0.979582	0.979582	0.849439	0.91451	no	no	n/a	n/a	n/a	n/a	n/a	n/a	n/a	n/a	n/a
11010341_B11	Extract	2014-11-25	1.07248	0.915008	0.993742	2014-12-05	1.06104	1.05114	0.971846	0.971846	1.00528	0.988561	no	no	n/a	n/a	n/a	n/a	n/a	n/a	n/a	n/a	n/a
11090205_A08	Extract	2014-11-19	1.08016	0.906742	0.993452	2014-12-04	0.983894	1.02305	0.970655	0.970655	1.01383	0.992241	no	no	n/a	n/a	n/a	n/a	n/a	n/a	n/a	n/a	n/a
11010416_G04	Extract	2014-11-25	0.947492	1.03939	0.993443	2014-12-05	0.922258	0.981226	0.823541	0.823541	0.745832	0.784686	no	no	n/a	n/a	n/a	n/a	n/a	n/a	n/a	n/a	n/a
11100302_G10	Extract	2014-11-19	1.00298	0.983498	0.993238	2014-11-21	0.983321	1.05381	0.995066	0.995066	1.07168	1.03337	no	no	n/a	n/a	n/a	n/a	n/a	n/a	n/a	n/a	n/a
11040302_H09	Extract	2014-11-19	1.00883	0.976282	0.992555	2014-12-05	0.944416	0.957716	0.828061	0.828061	0.920158	0.87411	no	no	n/a	n/a	n/a	n/a	n/a	n/a	n/a	n/a	n/a
11090501_E12	Extract	2014-11-19	1.00669	0.978112	0.992401	2014-12-05	0.989868	1.02044	0.938291	0.938291	0.985526	0.961909	no	no	n/a	n/a	n/a	n/a	n/a	n/a	n/a	n/a	n/a
11001218_G02	Extract	2014-11-25	1.07518	0.909596	0.992389	2014-12-05	0.996737	0.970428	0.988597	0.988597	1.00396	0.996276	no	no	n/a	n/a	n/a	n/a	n/a	n/a	n/a	n/a	n/a
11010535_H02	Extract	2014-11-25	1.01473	0.969859	0.992295	2014-12-05	0.949475	0.920844	0.866233	0.866233	0.819705	0.842969	no	no	n/a	n/a	n/a	n/a	n/a	n/a	n/a	n/a	n/a
11010402_F05	Extract	2014-11-25	1.04601	0.938552	0.99228	2014-12-05	1.03871	0.778176	0.807688	0.807688	0.758514	0.783101	no	no	n/a	n/a	n/a	n/a	n/a	n/a	n/a	n/a	n/a
11010341_A05	Extract	2014-11-25	0.97737	1.00594	0.991657	2014-12-05	1.07935	1.05578	0.936678	0.936678	0.91373	0.925204	no	no	n/a	n/a	n/a	n/a	n/a	n/a	n/a	n/a	n/a
11040208_E12	Extract	2014-11-19	0.846588	1.13513	0.990859	2014-12-05	0.971117	0.99505	0.844024	0.844024	0.971127	0.907576	no	no	n/a	n/a	n/a	n/a	n/a	n/a	n/a	n/a	n/a
11090304_B09	Extract	2014-11-19	1.03531	0.945248	0.990278	2014-12-05	0.912866	1.01156	0.804294	0.804294	0.868666	0.83648	no	no	n/a	n/a	n/a	n/a	n/a	n/a	n/a	n/a	n/a
11010535_D12	Extract	2014-11-25	0.995098	0.984899	0.989998	2014-12-05	0.877653	0.794458	0.837228	0.837228	0.793164	0.815196	no	no	n/a	n/a	n/a	n/a	n/a	n/a	n/a	n/a	n/a
11040303_C11	Extract	2014-11-19	1.04771	0.932278	0.989992	2014-12-05	0.994471	1.03629	0.836604	0.836604	0.942321	0.889463	no	no	n/a	n/a	n/a	n/a	n/a	n/a	n/a	n/a	n/a
11010353_E12	Extract	2014-11-25	0.927035	1.05294	0.989985	2014-12-05	1.03507	0.971736	1.00888	1.00888	0.843112	0.925997	no	no	n/a	n/a	n/a	n/a	n/a	n/a	n/a	n/a	n/a
11010402_E02	Extract	2014-11-25	1.02415	0.95509	0.989618	2014-12-05	1.21806	1.0025	0.905183	0.905183	0.920494	0.912839	no	no	n/a	n/a	n/a	n/a	n/a	n/a	n/a	n/a	n/a
11001218_H06	Extract	2014-11-25	0.985463	0.993503	0.989483	2014-12-05	0.971875	1.09406	0.959846	0.959846	0.977123	0.968484	no	no	n/a	n/a	n/a	n/a	n/a	n/a	n/a	n/a	n/a
11010341_F12	Extract	2014-11-25	0.959335	1.01949	0.989412	2014-12-05	0.967187	0.980177	0.953984	0.953984	1.04052	0.997251	no	no	n/a	n/a	n/a	n/a	n/a	n/a	n/a	n/a	n/a
11020711_D10	Extract	2014-11-24	1.00544	0.972804	0.989123	2014-12-05	0.836064	0.994163	0.809337	0.809337	0.894998	0.852168	no	no	n/a	n/a	n/a	n/a	n/a	n/a	n/a	n/a	n/a
11090206_G04	Extract	2014-11-19	1.04196	0.935518	0.988739	2014-12-04	0.861378	0.984683	1.07628	1.07628	1.05012	1.0632	no	no	n/a	n/a	n/a	n/a	n/a	n/a	n/a	n/a	n/a
11100804_D02	Extract	2014-11-19	1.08009	0.897136	0.988613	2014-11-20	1.04781	1.17801	1.00955	1.00955	0.990079	0.999816	no	no	n/a	n/a	n/a	n/a	n/a	n/a	n/a	n/a	n/a
11040208_G02	Extract	2014-11-19	0.959971	1.01709	0.988528	2014-12-05	1.02228	1.00742	0.927643	0.927643	0.96536	0.946502	no	no	n/a	n/a	n/a	n/a	n/a	n/a	n/a	n/a	n/a
11010341_A04	Extract	2014-11-25	1.00781	0.969133	0.988473	2014-12-05	1.10164	1.01726	0.932206	0.932206	0.927613	0.929909	no	no	n/a	n/a	n/a	n/a	n/a	n/a	n/a	n/a	n/a
11001218_G07	Extract	2014-11-25	1.02695	0.949907	0.988426	2014-12-05	1.0303	1.02169	0.981902	0.981902	1.11757	1.04974	no	no	n/a	n/a	n/a	n/a	n/a	n/a	n/a	n/a	n/a
11100906_A04	Extract	2014-11-19	1.00145	0.975249	0.98835	2014-12-04	1.22592	1.03813	0.91753	0.91753	0.896644	0.907087	no	no	n/a	n/a	n/a	n/a	n/a	n/a	n/a	n/a	n/a
11010535_F04	Extract	2014-11-25	1.04215	0.934029	0.988091	2014-12-05	0.916299	0.985994	0.788894	0.788894	0.736861	0.762878	no	no	n/a	n/a	n/a	n/a	n/a	n/a	n/a	n/a	n/a
11001218_A08	Extract	2014-11-25	1.02775	0.948022	0.987886	2014-12-05	1.04273	1.00452	0.998653	0.998653	1.11431	1.05648	no	no	n/a	n/a	n/a	n/a	n/a	n/a	n/a	n/a	n/a
11100804_G06	Extract	2014-11-19	1.08631	0.889297	0.987803	2014-11-20	1.07637	0.97674	1.05538	1.05538	0.995895	1.02564	no	no	n/a	n/a	n/a	n/a	n/a	n/a	n/a	n/a	n/a
11090201_D02	Extract	2014-11-19	0.996716	0.978604	0.98766	2014-12-04	0.941783	0.910521	1.04586	1.04586	0.929576	0.98772	no	no	n/a	n/a	n/a	n/a	n/a	n/a	n/a	n/a	n/a
11010416_H11	Extract	2014-11-25	1.00562	0.96956	0.987588	2014-12-05	0.81001	0.848925	0.628175	0.628175	0.82261	0.725392	no	no	n/a	n/a	n/a	n/a	n/a	n/a	n/a	n/a	n/a
11090301_B04	Extract	2014-11-19	1.04551	0.929399	0.987453	2014-12-05	1.01863	1.05283	0.842579	0.842579	0.95135	0.896965	no	no	n/a	n/a	n/a	n/a	n/a	n/a	n/a	n/a	n/a
11010416_C09	Extract	2014-11-25	1.02525	0.949398	0.987323	2014-12-05	0.785657	0.871526	0.73468	0.73468	0.696776	0.715728	no	no	n/a	n/a	n/a	n/a	n/a	n/a	n/a	n/a	n/a
11100304_C10	Extract	2014-11-19	1.16597	0.808037	0.987005	2014-12-04	1.1123	1.0347	1.07992	1.07992	1.08585	1.08289	no	no	n/a	n/a	n/a	n/a	n/a	n/a	n/a	n/a	n/a
11020708_A06	Extract	2014-11-24	0.945679	1.02763	0.986654	2014-12-05	0.808299	0.923213	0.854246	0.854246	0.907326	0.880786	no	no	n/a	n/a	n/a	n/a	n/a	n/a	n/a	n/a	n/a
11040303_E05	Extract	2014-11-19	0.9223	1.05096	0.986629	2014-12-05	0.989186	1.03	0.723332	0.723332	0.813751	0.768542	no	no	n/a	n/a	n/a	n/a	n/a	n/a	n/a	n/a	n/a
11090204_D10	Extract	2014-11-19	1.07824	0.894419	0.986329	2014-12-04	0.897221	0.973183	0.918967	0.918967	1.01764	0.968306	no	no	n/a	n/a	n/a	n/a	n/a	n/a	n/a	n/a	n/a
11040302_E03	Extract	2014-11-19	0.991561	0.980737	0.986149	2014-12-05	1.00086	0.879863	0.780502	0.780502	0.605045	0.692773	no	no	n/a	n/a	n/a	n/a	n/a	n/a	n/a	n/a	n/a
11010216_C08	Extract	2014-11-25	1.05524	0.916893	0.986069	2014-12-05	0.97633	1.0029	0.931094	0.931094	0.932155	0.931625	no	no	n/a	n/a	n/a	n/a	n/a	n/a	n/a	n/a	n/a
11040303_D03	Extract	2014-11-19	0.958782	1.01335	0.986068	2014-12-05	0.813784	1.08605	0.685136	0.685136	0.795574	0.740355	no	no	n/a	n/a	n/a	n/a	n/a	n/a	n/a	n/a	n/a
11020708_E03	Extract	2014-11-24	1.10711	0.864907	0.98601	2014-12-05	0.959823	1.09517	0.765657	0.765657	0.922207	0.843932	no	no	n/a	n/a	n/a	n/a	n/a	n/a	n/a	n/a	n/a
11100903_F09	Extract	2014-11-19	1.03278	0.939086	0.985932	2014-12-04	0.945744	0.961967	0.784799	0.784799	0.878094	0.831447	no	no	n/a	n/a	n/a	n/a	n/a	n/a	n/a	n/a	n/a
11090301_E02	Extract	2014-11-19	1.09983	0.871755	0.985795	2014-12-05	0.949453	1.16328	0.950119	0.950119	0.935073	0.942596	no	no	n/a	n/a	n/a	n/a	n/a	n/a	n/a	n/a	n/a
11020711_B09	Extract	2014-11-24	0.965094	1.0062	0.985649	2014-12-05	0.829715	1.25347	0.805082	0.805082	0.810642	0.807862	no	no	n/a	n/a	n/a	n/a	n/a	n/a	n/a	n/a	n/a
11020708_C06	Extract	2014-11-24	1.04884	0.921797	0.985321	2014-12-05	1.17481	1.12153	0.932649	0.932649	0.972234	0.952441	no	no	n/a	n/a	n/a	n/a	n/a	n/a	n/a	n/a	n/a
11010416_E05	Extract	2014-11-25	1.05903	0.91147	0.985251	2014-12-05	0.903064	1.01291	0.838565	0.838565	0.735711	0.787138	no	no	n/a	n/a	n/a	n/a	n/a	n/a	n/a	n/a	n/a
11010416_F08	Extract	2014-11-25	1.06178	0.908474	0.985129	2014-12-05	0.932113	0.950237	0.84744	0.84744	0.764294	0.805867	no	no	n/a	n/a	n/a	n/a	n/a	n/a	n/a	n/a	n/a
11020711_A03	Extract	2014-11-24	1.03095	0.939217	0.985081	2014-12-05	0.925056	1.02647	0.896768	0.896768	0.864242	0.880505	no	no	n/a	n/a	n/a	n/a	n/a	n/a	n/a	n/a	n/a
11090301_F03	Extract	2014-11-19	0.993405	0.976719	0.985062	2014-12-05	0.807857	1.00197	0.854098	0.854098	0.925929	0.890013	no	no	n/a	n/a	n/a	n/a	n/a	n/a	n/a	n/a	n/a
11020709_D08	Extract	2014-11-24	1.06674	0.902896	0.98482	2014-12-05	0.882854	1.2078	0.88703	0.88703	0.821157	0.854094	no	no	n/a	n/a	n/a	n/a	n/a	n/a	n/a	n/a	n/a
11001218_B09	Extract	2014-11-25	0.946419	1.02272	0.984569	2014-12-05	1.01738	0.98133	0.983847	0.983847	1.0237	1.00377	no	no	n/a	n/a	n/a	n/a	n/a	n/a	n/a	n/a	n/a
11010216_A06	Extract	2014-11-25	0.976566	0.992399	0.984482	2014-12-05	1.12114	0.977388	0.840396	0.840396	0.989718	0.915057	no	no	n/a	n/a	n/a	n/a	n/a	n/a	n/a	n/a	n/a
11040303_E04	Extract	2014-11-19	0.965856	1.00231	0.984081	2014-12-05	0.983624	1.06518	0.748357	0.748357	0.902283	0.82532	no	no	n/a	n/a	n/a	n/a	n/a	n/a	n/a	n/a	n/a
11020708_A03	Extract	2014-11-24	1.00239	0.965252	0.983819	2014-12-05	0.896617	1.00762	0.905088	0.905088	0.939129	0.922109	no	no	n/a	n/a	n/a	n/a	n/a	n/a	n/a	n/a	n/a
11090201_G09	Extract	2014-11-19	0.927334	1.03908	0.983208	2014-12-04	0.984884	0.991603	0.994799	0.994799	0.996901	0.99585	no	no	n/a	n/a	n/a	n/a	n/a	n/a	n/a	n/a	n/a
11090302_E10	Extract	2014-11-19	0.975207	0.990742	0.982975	2014-12-05	0.903365	0.967408	0.74014	0.74014	0.87126	0.8057	no	no	n/a	n/a	n/a	n/a	n/a	n/a	n/a	n/a	n/a
11010216_A02	Extract	2014-11-25	1.00323	0.962644	0.982937	2014-12-05	1.05845	0.923615	0.941706	0.941706	0.963208	0.952457	no	no	n/a	n/a	n/a	n/a	n/a	n/a	n/a	n/a	n/a
11010535_B04	Extract	2014-11-25	1.12743	0.83837	0.982898	2014-12-05	1.02313	1.06225	0.812794	0.812794	0.677998	0.745396	no	no	n/a	n/a	n/a	n/a	n/a	n/a	n/a	n/a	n/a
11020711_E08	Extract	2014-11-24	1.01482	0.950962	0.982893	2014-12-05	0.784469	0.986277	0.560634	0.560634	0.798339	0.679486	no	no	n/a	n/a	n/a	n/a	n/a	n/a	n/a	n/a	n/a
11010535_E12	Extract	2014-11-25	1.04628	0.919289	0.982786	2014-12-05	1.03845	0.93328	0.932558	0.932558	0.902866	0.917712	no	no	n/a	n/a	n/a	n/a	n/a	n/a	n/a	n/a	n/a
11010341_G03	Extract	2014-11-25	0.981149	0.984293	0.982721	2014-12-05	1.04462	0.994306	0.974624	0.974624	0.961597	0.968111	no	no	n/a	n/a	n/a	n/a	n/a	n/a	n/a	n/a	n/a
11010416_C07	Extract	2014-11-25	1.06649	0.898527	0.98251	2014-12-05	0.986315	0.935304	0.882086	0.882086	0.73341	0.807748	no	no	n/a	n/a	n/a	n/a	n/a	n/a	n/a	n/a	n/a
11020711_C02	Extract	2014-11-24	1.02659	0.938174	0.982382	2014-12-05	1.24778	1.084	1.09364	1.09364	1.0595	1.07657	no	no	n/a	n/a	n/a	n/a	n/a	n/a	n/a	n/a	n/a
11020901_E06	Extract	2014-11-24	1.00434	0.959578	0.981957	2014-12-05	0.790383	1.02723	0.996845	0.996845	0.911691	0.954268	no	no	n/a	n/a	n/a	n/a	n/a	n/a	n/a	n/a	n/a
11090205_A05	Extract	2014-11-19	1.05622	0.907398	0.981808	2014-12-04	1.04419	1.00081	0.91616	0.91616	1.02109	0.968623	no	no	n/a	n/a	n/a	n/a	n/a	n/a	n/a	n/a	n/a
11090205_E06	Extract	2014-11-19	1.10218	0.861252	0.981718	2014-12-04	0.875571	0.865515	0.8388	0.8388	0.946811	0.892805	no	no	n/a	n/a	n/a	n/a	n/a	n/a	n/a	n/a	n/a
11090301_B07	Extract	2014-11-19	1.00314	0.959956	0.981549	2014-12-05	0.94423	1.10278	0.824838	0.824838	0.967952	0.896395	no	no	n/a	n/a	n/a	n/a	n/a	n/a	n/a	n/a	n/a
11010119_C06	Extract	2014-11-25	0.907106	1.05549	0.981298	2014-12-05	0.978196	1.02238	0.98693	0.98693	1.01204	0.999486	no	no	n/a	n/a	n/a	n/a	n/a	n/a	n/a	n/a	n/a
11010535_F05	Extract	2014-11-25	1.08199	0.880492	0.981243	2014-12-05	0.898395	0.950462	0.847173	0.847173	0.712045	0.779609	no	no	n/a	n/a	n/a	n/a	n/a	n/a	n/a	n/a	n/a
11100206_E07	Extract	2014-11-19	1.11552	0.846867	0.981194	2014-11-21	1.10516	1.1447	0.928147	0.928147	1.09007	1.00911	no	no	n/a	n/a	n/a	n/a	n/a	n/a	n/a	n/a	n/a
11090304_E07	Extract	2014-11-19	0.990078	0.972129	0.981103	2014-12-05	0.975853	1.05453	0.891822	0.891822	0.888835	0.890329	no	no	n/a	n/a	n/a	n/a	n/a	n/a	n/a	n/a	n/a
11010535_B08	Extract	2014-11-25	0.986508	0.975282	0.980895	2014-12-05	0.874815	0.937126	0.852813	0.852813	0.831265	0.842039	no	no	n/a	n/a	n/a	n/a	n/a	n/a	n/a	n/a	n/a
11010216_F02	Extract	2014-11-25	0.999746	0.961836	0.980791	2014-12-05	0.954267	1.01588	0.94115	0.94115	0.958344	0.949747	no	no	n/a	n/a	n/a	n/a	n/a	n/a	n/a	n/a	n/a
11010416_B05	Extract	2014-11-25	1.0834	0.878095	0.980747	2014-12-05	0.898395	0.955904	0.817098	0.817098	0.847426	0.832262	no	no	n/a	n/a	n/a	n/a	n/a	n/a	n/a	n/a	n/a
11010535_B07	Extract	2014-11-25	1.03549	0.92591	0.9807	2014-12-05	0.955435	1.02989	0.784617	0.784617	0.843688	0.814152	no	no	n/a	n/a	n/a	n/a	n/a	n/a	n/a	n/a	n/a
11090302_E09	Extract	2014-11-19	0.907397	1.05279	0.980095	2014-12-05	0.984172	0.961897	0.870438	0.870438	0.862149	0.866293	no	no	n/a	n/a	n/a	n/a	n/a	n/a	n/a	n/a	n/a
11040303_G08	Extract	2014-11-19	0.902285	1.05702	0.979654	2014-12-05	0.952468	0.993844	0.873184	0.873184	0.906208	0.889696	no	no	n/a	n/a	n/a	n/a	n/a	n/a	n/a	n/a	n/a
11040302_D10	Extract	2014-11-19	0.965076	0.993926	0.979501	2014-12-05	0.861847	0.869203	0.802516	0.802516	0.801341	0.801928	no	no	n/a	n/a	n/a	n/a	n/a	n/a	n/a	n/a	n/a
11090301_A03	Extract	2014-11-19	0.984086	0.974892	0.979489	2014-12-05	0.939715	1.00868	0.940253	0.940253	0.92888	0.934566	no	no	n/a	n/a	n/a	n/a	n/a	n/a	n/a	n/a	n/a
11090301_H05	Extract	2014-11-19	1.06767	0.891053	0.979362	2014-12-05	1.13709	0.959726	0.927865	0.927865	0.96565	0.946757	no	no	n/a	n/a	n/a	n/a	n/a	n/a	n/a	n/a	n/a
11020709_C05	Extract	2014-11-24	1.01699	0.941115	0.979053	2014-12-05	1.04255	1.15985	0.863748	0.863748	0.885018	0.874383	no	no	n/a	n/a	n/a	n/a	n/a	n/a	n/a	n/a	n/a
11040208_D11	Extract	2014-11-19	0.92191	1.03581	0.978859	2014-12-05	0.895494	0.96401	0.79975	0.79975	0.835582	0.817666	no	no	n/a	n/a	n/a	n/a	n/a	n/a	n/a	n/a	n/a
11040209_E04	Extract	2014-11-19	0.987839	0.969511	0.978675	2014-12-05	0.962484	1.05329	0.769249	0.769249	0.874987	0.822118	no	no	n/a	n/a	n/a	n/a	n/a	n/a	n/a	n/a	n/a
11001218_B07	Extract	2014-11-25	0.984391	0.97293	0.978661	2014-12-05	1.03991	1.05762	1.06204	1.06204	1.01204	1.03704	no	no	n/a	n/a	n/a	n/a	n/a	n/a	n/a	n/a	n/a
11010416_D09	Extract	2014-11-25	1.04656	0.910271	0.978415	2014-12-05	1.29677	0.808243	0.806886	0.806886	0.741203	0.774044	no	no	n/a	n/a	n/a	n/a	n/a	n/a	n/a	n/a	n/a
11100804_A09	Extract	2014-11-19	1.00282	0.953292	0.978057	2014-11-20	1.21228	1.30926	1.21701	1.21701	1.07402	1.14551	no	no	n/a	n/a	n/a	n/a	n/a	n/a	n/a	n/a	n/a
11040303_D04	Extract	2014-11-19	0.965661	0.989294	0.977477	2014-12-05	1.00808	1.23123	0.769249	0.769249	0.931089	0.850169	no	no	n/a	n/a	n/a	n/a	n/a	n/a	n/a	n/a	n/a
11010119_C12	Extract	2014-11-25	0.96231	0.992129	0.97722	2014-12-05	1.04037	0.99479	1.02657	1.02657	0.945104	0.985838	no	no	n/a	n/a	n/a	n/a	n/a	n/a	n/a	n/a	n/a
11010416_C08	Extract	2014-11-25	0.986508	0.966834	0.976671	2014-12-05	1.01898	0.910882	0.838297	0.838297	0.709744	0.774021	no	no	n/a	n/a	n/a	n/a	n/a	n/a	n/a	n/a	n/a
11020708_D11	Extract	2014-11-24	0.975343	0.977853	0.976598	2014-12-05	0.743615	0.964549	0.841648	0.841648	0.743743	0.792696	no	no	n/a	n/a	n/a	n/a	n/a	n/a	n/a	n/a	n/a
11090301_G07	Extract	2014-11-19	1.02489	0.928028	0.976457	2014-12-05	1.00034	0.997155	0.869317	0.869317	0.883614	0.876466	no	no	n/a	n/a	n/a	n/a	n/a	n/a	n/a	n/a	n/a
11010216_F06	Extract	2014-11-25	0.980881	0.971826	0.976353	2014-12-05	0.905966	0.992693	0.913232	0.913232	0.85971	0.886471	no	no	n/a	n/a	n/a	n/a	n/a	n/a	n/a	n/a	n/a
11010353_H10	Extract	2014-11-25	1.04298	0.909672	0.976326	2014-12-05	0.731016	0.707022	0.811457	0.811457	0.767457	0.789457	no	no	n/a	n/a	n/a	n/a	n/a	n/a	n/a	n/a	n/a
11090301_G04	Extract	2014-11-19	1.03396	0.918368	0.976165	2014-12-05	0.954936	1.03556	0.87523	0.87523	0.897622	0.886426	no	no	n/a	n/a	n/a	n/a	n/a	n/a	n/a	n/a	n/a
11090204_C07	Extract	2014-11-19	1.00955	0.942553	0.976054	2014-12-04	0.989368	1.00081	1.03959	1.03959	0.935768	0.987681	no	no	n/a	n/a	n/a	n/a	n/a	n/a	n/a	n/a	n/a
11010341_H08	Extract	2014-11-25	0.944516	1.00702	0.975768	2014-12-05	0.884625	0.813073	0.961234	0.961234	0.921815	0.941525	no	no	n/a	n/a	n/a	n/a	n/a	n/a	n/a	n/a	n/a
11010402_B07	Extract	2014-11-25	1.04796	0.903351	0.975657	2014-12-05	0.937556	0.905237	0.763124	0.763124	0.766594	0.764859	no	no	n/a	n/a	n/a	n/a	n/a	n/a	n/a	n/a	n/a
11090204_C02	Extract	2014-11-19	0.966497	0.984547	0.975522	2014-12-04	0.919391	0.962422	0.917096	0.917096	0.899853	0.908474	no	no	n/a	n/a	n/a	n/a	n/a	n/a	n/a	n/a	n/a
11090204_A12	Extract	2014-11-19	1.09444	0.856423	0.975433	2014-12-04	0.88429	0.916907	0.898286	0.898286	0.964769	0.931528	no	no	n/a	n/a	n/a	n/a	n/a	n/a	n/a	n/a	n/a
11040302_B09	Extract	2014-11-19	0.980765	0.969864	0.975314	2014-12-05	1.0512	1.00986	0.951574	0.951574	0.897421	0.924498	no	no	n/a	n/a	n/a	n/a	n/a	n/a	n/a	n/a	n/a
11100305_D11	Extract	2014-11-19	1.11267	0.837521	0.975095	2014-12-04	1.00733	0.954783	0.925079	0.925079	0.963684	0.944382	no	no	n/a	n/a	n/a	n/a	n/a	n/a	n/a	n/a	n/a
11040208_D10	Extract	2014-11-19	0.912887	1.03722	0.975054	2014-12-05	0.864365	1.04842	0.882247	0.882247	0.848929	0.865588	no	no	n/a	n/a	n/a	n/a	n/a	n/a	n/a	n/a	n/a
11010216_C11	Extract	2014-11-25	1.0415	0.908519	0.975008	2014-12-05	0.981018	0.98481	0.901788	0.901788	0.925036	0.913412	no	no	n/a	n/a	n/a	n/a	n/a	n/a	n/a	n/a	n/a
11090501_G09	Extract	2014-11-19	0.971881	0.978112	0.974997	2014-12-05	0.942811	1.02308	0.926184	0.926184	0.899243	0.912713	no	no	n/a	n/a	n/a	n/a	n/a	n/a	n/a	n/a	n/a
11040302_C08	Extract	2014-11-19	0.923859	1.02582	0.974839	2014-12-05	1.08681	0.973947	0.836604	0.836604	0.805569	0.821086	no	no	n/a	n/a	n/a	n/a	n/a	n/a	n/a	n/a	n/a
11020711_E07	Extract	2014-11-24	1.02332	0.926199	0.974759	2014-12-05	0.50697	0.890716	0.525297	0.525297	0.616659	0.570978	no	no	n/a	n/a	n/a	n/a	n/a	n/a	n/a	n/a	n/a
11020711_B12	Extract	2014-11-24	0.996926	0.952443	0.974684	2014-12-05	0.931623	1.03974	1.06889	1.06889	1.06746	1.06818	no	no	n/a	n/a	n/a	n/a	n/a	n/a	n/a	n/a	n/a
11040302_F05	Extract	2014-11-19	0.973905	0.975398	0.974651	2014-12-05	1.05872	1.01543	0.897936	0.897936	0.973845	0.93589	no	no	n/a	n/a	n/a	n/a	n/a	n/a	n/a	n/a	n/a
11020711_F03	Extract	2014-11-24	1.05626	0.893029	0.974642	2014-12-05	0.670017	0.987805	0.684938	0.684938	0.851148	0.768043	no	no	n/a	n/a	n/a	n/a	n/a	n/a	n/a	n/a	n/a
11010353_B06	Extract	2014-11-25	0.96437	0.984599	0.974485	2014-12-05	1.02677	0.934855	0.919673	0.919673	0.836182	0.877928	no	no	n/a	n/a	n/a	n/a	n/a	n/a	n/a	n/a	n/a
11040208_E11	Extract	2014-11-19	0.954865	0.993926	0.974395	2014-12-05	0.90327	0.990685	0.840985	0.840985	0.897723	0.869354	no	no	n/a	n/a	n/a	n/a	n/a	n/a	n/a	n/a	n/a
11090204_E09	Extract	2014-11-19	1.08355	0.863677	0.973615	2014-12-04	1.02001	0.844297	0.911138	0.911138	0.969276	0.940207	no	no	n/a	n/a	n/a	n/a	n/a	n/a	n/a	n/a	n/a
11090205_F09	Extract	2014-11-19	1.02501	0.920573	0.972793	2014-12-04	0.94753	0.910521	0.879195	0.879195	0.955102	0.917149	no	no	n/a	n/a	n/a	n/a	n/a	n/a	n/a	n/a	n/a
11010353_G07	Extract	2014-11-25	1.01335	0.932231	0.972792	2014-12-05	0.950249	0.891429	0.910557	0.910557	0.904908	0.907732	no	no	n/a	n/a	n/a	n/a	n/a	n/a	n/a	n/a	n/a
11090204_D08	Extract	2014-11-19	1.06228	0.883014	0.972645	2014-12-04	0.895982	0.933546	0.874485	0.874485	0.856713	0.865599	no	no	n/a	n/a	n/a	n/a	n/a	n/a	n/a	n/a	n/a
11090205_D09	Extract	2014-11-19	1.01439	0.930689	0.972538	2014-12-04	0.956993	0.911793	1.0186	1.0186	0.996901	1.00775	no	no	n/a	n/a	n/a	n/a	n/a	n/a	n/a	n/a	n/a
11010119_G02	Extract	2014-11-25	1.01912	0.925564	0.972342	2014-12-05	1.00684	1.09498	0.938622	0.938622	1.04116	0.989892	no	no	n/a	n/a	n/a	n/a	n/a	n/a	n/a	n/a	n/a
11010353_D03	Extract	2014-11-25	1.01363	0.931033	0.972331	2014-12-05	1.00835	0.942546	0.97771	0.97771	0.812488	0.895099	no	no	n/a	n/a	n/a	n/a	n/a	n/a	n/a	n/a	n/a
11100804_F06	Extract	2014-11-19	1.05122	0.893316	0.972267	2014-11-20	1.0241	1.08939	1.04107	1.04107	1.05559	1.04833	no	no	n/a	n/a	n/a	n/a	n/a	n/a	n/a	n/a	n/a
11010535_H09	Extract	2014-11-25	0.969354	0.974952	0.972153	2014-12-05	0.791616	0.779525	0.763124	0.763124	0.730822	0.746973	no	no	n/a	n/a	n/a	n/a	n/a	n/a	n/a	n/a	n/a
11001218_D10	Extract	2014-11-25	0.978201	0.965067	0.971634	2014-12-05	1.03781	0.980638	0.940595	0.940595	1.1483	1.04445	no	no	n/a	n/a	n/a	n/a	n/a	n/a	n/a	n/a	n/a
11040208_D08	Extract	2014-11-19	0.983317	0.959893	0.971605	2014-12-05	0.976098	0.960851	0.781049	0.781049	0.881962	0.831506	no	no	n/a	n/a	n/a	n/a	n/a	n/a	n/a	n/a	n/a
11100206_H06	Extract	2014-11-19	1.24985	0.693119	0.971485	2014-11-21	1.10866	1.20436	1.04572	1.04572	1.19833	1.12203	no	no	n/a	n/a	n/a	n/a	n/a	n/a	n/a	n/a	n/a
11001218_D02	Extract	2014-11-25	1.01186	0.930976	0.971418	2014-12-05	1.00777	1.06855	0.991652	0.991652	1.01236	1.00201	no	no	n/a	n/a	n/a	n/a	n/a	n/a	n/a	n/a	n/a
11100302_C02	Extract	2014-11-19	1.10138	0.840966	0.971171	2014-11-21	0.889503	1.02719	0.757651	0.757651	1.00111	0.879379	no	no	n/a	n/a	n/a	n/a	n/a	n/a	n/a	n/a	n/a
11020901_A02	Extract	2014-11-24	1.04863	0.893467	0.971047	2014-12-05	0.8682	1.00993	1.04178	1.04178	0.893467	0.967623	no	no	n/a	n/a	n/a	n/a	n/a	n/a	n/a	n/a	n/a
11100905_G09	Extract	2014-11-19	1.01733	0.92308	0.970203	2014-12-04	0.888871	0.986079	0.842951	0.842951	0.882966	0.862959	no	no	n/a	n/a	n/a	n/a	n/a	n/a	n/a	n/a	n/a
11040303_F08	Extract	2014-11-19	0.836785	1.10355	0.97017	2014-12-05	0.950807	0.931765	0.798655	0.798655	0.817103	0.807879	no	no	n/a	n/a	n/a	n/a	n/a	n/a	n/a	n/a	n/a
11040208_C07	Extract	2014-11-19	0.949759	0.990354	0.970057	2014-12-05	0.978063	1.0545	0.812126	0.812126	0.890144	0.851135	no	no	n/a	n/a	n/a	n/a	n/a	n/a	n/a	n/a	n/a
11040303_C05	Extract	2014-11-19	0.845224	1.09464	0.969934	2014-12-05	1.02867	1.09914	0.838521	0.838521	0.876496	0.857509	no	no	n/a	n/a	n/a	n/a	n/a	n/a	n/a	n/a	n/a
11010353_F12	Extract	2014-11-25	0.941683	0.997841	0.969762	2014-12-05	0.870146	0.837164	0.91323	0.91323	0.873133	0.893182	no	no	n/a	n/a	n/a	n/a	n/a	n/a	n/a	n/a	n/a
11010535_A02	Extract	2014-11-25	1.05072	0.888611	0.969664	2014-12-05	1.0304	1.08602	1.00081	1.00081	0.977401	0.989104	no	no	n/a	n/a	n/a	n/a	n/a	n/a	n/a	n/a	n/a
11100806_C05	Extract	2014-11-19	1.03767	0.901556	0.969615	2014-11-20	1.10875	1.09662	0.551583	0.551583	0.698746	0.625164	no	no	n/a	n/a	n/a	n/a	n/a	n/a	n/a	n/a	n/a
11010216_B12	Extract	2014-11-25	0.909518	1.0284	0.96896	2014-12-05	0.929405	0.952127	0.917149	0.917149	0.826081	0.871615	no	no	n/a	n/a	n/a	n/a	n/a	n/a	n/a	n/a	n/a
11040208_F12	Extract	2014-11-19	0.957807	0.98003	0.968919	2014-12-05	1.0209	1.00185	0.821737	0.821737	0.945945	0.883841	no	no	n/a	n/a	n/a	n/a	n/a	n/a	n/a	n/a	n/a
11100205_G11	Extract	2014-11-19	0.936669	1.00055	0.96861	2014-11-21	0.905983	1.06284	0.915536	0.915536	1.02427	0.969903	no	no	n/a	n/a	n/a	n/a	n/a	n/a	n/a	n/a	n/a
11010402_D09	Extract	2014-11-25	1.01115	0.92561	0.96838	2014-12-05	0.870404	0.704525	0.764487	0.764487	0.717249	0.740868	no	no	n/a	n/a	n/a	n/a	n/a	n/a	n/a	n/a	n/a
11001218_G03	Extract	2014-11-25	0.988411	0.947752	0.968082	2014-12-05	1.07347	1.08339	0.95929	0.95929	1.03082	0.995055	no	no	n/a	n/a	n/a	n/a	n/a	n/a	n/a	n/a	n/a
11010402_A03	Extract	2014-11-25	1.03274	0.903351	0.968044	2014-12-05	1.06828	0.812089	0.889598	0.889598	0.841071	0.865334	no	no	n/a	n/a	n/a	n/a	n/a	n/a	n/a	n/a	n/a
11010402_C07	Extract	2014-11-25	1.03384	0.902152	0.967995	2014-12-05	0.958556	0.85954	0.785954	0.785954	0.755926	0.77094	no	no	n/a	n/a	n/a	n/a	n/a	n/a	n/a	n/a	n/a
11001218_A05	Extract	2014-11-25	0.979541	0.956423	0.967982	2014-12-05	0.957555	1.01033	0.931372	0.931372	1.05282	0.992097	no	no	n/a	n/a	n/a	n/a	n/a	n/a	n/a	n/a	n/a
11100206_B11	Extract	2014-11-19	1.05758	0.87821	0.967895	2014-11-21	0.942393	0.982547	0.90034	0.90034	0.968513	0.934427	no	no	n/a	n/a	n/a	n/a	n/a	n/a	n/a	n/a	n/a
11010416_C02	Extract	2014-11-25	0.991216	0.944574	0.967895	2014-12-05	0.895557	1.05139	0.830785	0.830785	0.832991	0.831888	no	no	n/a	n/a	n/a	n/a	n/a	n/a	n/a	n/a	n/a
11010416_H07	Extract	2014-11-25	0.89438	1.04029	0.967336	2014-12-05	0.928475	0.866781	0.759916	0.759916	0.702527	0.731221	no	no	n/a	n/a	n/a	n/a	n/a	n/a	n/a	n/a	n/a
11090205_E10	Extract	2014-11-19	0.916708	1.01776	0.967233	2014-12-04	1.00133	1.04915	0.927109	0.927109	0.952694	0.939902	no	no	n/a	n/a	n/a	n/a	n/a	n/a	n/a	n/a	n/a
11010341_A03	Extract	2014-11-25	0.935378	0.998915	0.967147	2014-12-05	1.02325	0.971119	0.95929	0.95929	0.9299	0.944595	no	no	n/a	n/a	n/a	n/a	n/a	n/a	n/a	n/a	n/a
11020711_B11	Extract	2014-11-24	1.04449	0.889461	0.966975	2014-12-05	0.901879	1.10479	0.90081	0.90081	0.880399	0.890604	no	no	n/a	n/a	n/a	n/a	n/a	n/a	n/a	n/a	n/a
11020901_C07	Extract	2014-11-24	1.00174	0.931248	0.966492	2014-12-05	1.19168	1.15466	0.959263	0.959263	1.06463	1.01195	no	no	n/a	n/a	n/a	n/a	n/a	n/a	n/a	n/a	n/a
11010416_H05	Extract	2014-11-25	0.935047	0.997841	0.966444	2014-12-05	0.86834	0.914052	0.705701	0.705701	0.751871	0.728786	no	no	n/a	n/a	n/a	n/a	n/a	n/a	n/a	n/a	n/a
11090204_B09	Extract	2014-11-19	1.13002	0.802609	0.966316	2014-12-04	1.02898	1.15127	1.05965	1.05965	0.991018	1.02533	no	no	n/a	n/a	n/a	n/a	n/a	n/a	n/a	n/a	n/a
11010119_C09	Extract	2014-11-25	1.00781	0.924487	0.96615	2014-12-05	0.981951	1.01148	0.962346	0.962346	0.894628	0.928487	no	no	n/a	n/a	n/a	n/a	n/a	n/a	n/a	n/a	n/a
11010119_F09	Extract	2014-11-25	0.981417	0.949907	0.965662	2014-12-05	0.916041	1.03536	0.856591	0.856591	0.942817	0.899704	no	no	n/a	n/a	n/a	n/a	n/a	n/a	n/a	n/a	n/a
11040208_A10	Extract	2014-11-19	0.938962	0.992317	0.965639	2014-12-05	1.04843	1.0613	0.977421	0.977421	0.918346	0.947884	no	no	n/a	n/a	n/a	n/a	n/a	n/a	n/a	n/a	n/a
11010535_C08	Extract	2014-11-25	1.01889	0.912368	0.965628	2014-12-05	0.890114	0.955432	0.821642	0.821642	0.792014	0.806828	no	no	n/a	n/a	n/a	n/a	n/a	n/a	n/a	n/a	n/a
11040209_H05	Extract	2014-11-19	0.939956	0.990902	0.965429	2014-12-05	1.04397	0.976624	0.862725	0.862725	0.915025	0.888875	no	no	n/a	n/a	n/a	n/a	n/a	n/a	n/a	n/a	n/a
11020711_C07	Extract	2014-11-24	1.00588	0.924739	0.965307	2014-12-05	1.02416	1.02685	0.849968	0.849968	1.02433	0.937148	no	no	n/a	n/a	n/a	n/a	n/a	n/a	n/a	n/a	n/a
11020711_E10	Extract	2014-11-24	0.906024	1.02448	0.965251	2014-12-05	0.635511	0.919165	0.544987	0.544987	0.743488	0.644237	no	no	n/a	n/a	n/a	n/a	n/a	n/a	n/a	n/a	n/a
11010416_B07	Extract	2014-11-25	1.06927	0.861229	0.965251	2014-12-05	1.14459	1.01359	0.915636	0.915636	0.763143	0.83939	no	no	n/a	n/a	n/a	n/a	n/a	n/a	n/a	n/a	n/a
11090206_E05	Extract	2014-11-19	1.0052	0.925205	0.965204	2014-12-04	0.835988	0.709153	0.913009	0.913009	0.939587	0.926298	no	no	n/a	n/a	n/a	n/a	n/a	n/a	n/a	n/a	n/a
11100903_E06	Extract	2014-11-19	0.968305	0.96204	0.965173	2014-12-04	0.931706	0.901631	0.771847	0.771847	0.818875	0.795361	no	no	n/a	n/a	n/a	n/a	n/a	n/a	n/a	n/a	n/a
11010216_A08	Extract	2014-11-25	0.994092	0.93585	0.964971	2014-12-05	0.909954	0.92917	0.833979	0.833979	0.856489	0.845234	no	no	n/a	n/a	n/a	n/a	n/a	n/a	n/a	n/a	n/a
11020901_A07	Extract	2014-11-24	1.03162	0.898286	0.964952	2014-12-05	0.842174	1.03993	0.962832	0.962832	0.868862	0.915847	no	no	n/a	n/a	n/a	n/a	n/a	n/a	n/a	n/a	n/a
11090302_H07	Extract	2014-11-19	1.02643	0.902998	0.964713	2014-12-05	0.959214	0.873396	0.863683	0.863683	0.99561	0.929647	no	no	n/a	n/a	n/a	n/a	n/a	n/a	n/a	n/a	n/a
11100102_F10	Extract	2014-11-19	1.19297	0.736222	0.964594	2014-11-21	0.887021	1.26802	0.648904	0.648904	1.00893	0.828917	no	no	n/a	n/a	n/a	n/a	n/a	n/a	n/a	n/a	n/a
11020709_H08	Extract	2014-11-24	0.992137	0.936901	0.964519	2014-12-05	0.836499	1.31109	0.839024	0.839024	0.980963	0.909994	no	no	n/a	n/a	n/a	n/a	n/a	n/a	n/a	n/a	n/a
11020711_C11	Extract	2014-11-24	1.10165	0.827356	0.964504	2014-12-05	1.02001	1.13501	0.834534	0.834534	0.901941	0.868237	no	no	n/a	n/a	n/a	n/a	n/a	n/a	n/a	n/a	n/a
11090304_F05	Extract	2014-11-19	1.10184	0.826764	0.964302	2014-12-05	0.943993	1.06724	0.823436	0.823436	0.980954	0.902195	no	no	n/a	n/a	n/a	n/a	n/a	n/a	n/a	n/a	n/a
11010535_A08	Extract	2014-11-25	1.03219	0.895831	0.964009	2014-12-05	1.25312	0.998205	1.01102	1.01102	0.893636	0.952328	no	no	n/a	n/a	n/a	n/a	n/a	n/a	n/a	n/a	n/a
11090201_E06	Extract	2014-11-19	0.936758	0.990709	0.963733	2014-12-04	0.910176	0.87676	0.948414	0.948414	0.960297	0.954356	no	no	n/a	n/a	n/a	n/a	n/a	n/a	n/a	n/a	n/a
11040209_A02	Extract	2014-11-19	1.00255	0.923916	0.963234	2014-12-05	0.977233	0.922552	0.974409	0.974409	0.878036	0.926223	no	no	n/a	n/a	n/a	n/a	n/a	n/a	n/a	n/a	n/a
11001218_H11	Extract	2014-11-25	1.03718	0.88878	0.962982	2014-12-05	0.922385	0.884663	0.907649	0.907649	0.938308	0.922978	no	no	n/a	n/a	n/a	n/a	n/a	n/a	n/a	n/a	n/a
11010402_C03	Extract	2014-11-25	1.03689	0.888911	0.962902	2014-12-05	0.870146	0.898895	0.811724	0.811724	0.636475	0.7241	no	no	n/a	n/a	n/a	n/a	n/a	n/a	n/a	n/a	n/a
11010353_H12	Extract	2014-11-25	0.935873	0.989722	0.962798	2014-12-05	0.855621	0.804398	0.838832	0.838832	0.764294	0.801563	no	no	n/a	n/a	n/a	n/a	n/a	n/a	n/a	n/a	n/a
11010535_F08	Extract	2014-11-25	1.01418	0.91117	0.962675	2014-12-05	0.884928	0.863161	0.784884	0.784884	0.630695	0.70779	no	no	n/a	n/a	n/a	n/a	n/a	n/a	n/a	n/a	n/a
11020711_E03	Extract	2014-11-24	0.972288	0.952234	0.962261	2014-12-05	0.850697	0.928597	0.977345	0.977345	0.852705	0.915025	no	no	n/a	n/a	n/a	n/a	n/a	n/a	n/a	n/a	n/a
11010416_D02	Extract	2014-11-25	1.06178	0.862427	0.962106	2014-12-05	0.986031	1.03893	0.794802	0.794802	0.833278	0.81404	no	no	n/a	n/a	n/a	n/a	n/a	n/a	n/a	n/a	n/a
11090201_B10	Extract	2014-11-19	1.03011	0.893982	0.962046	2014-12-04	0.952757	1.04327	0.956244	0.956244	0.940275	0.948259	no	no	n/a	n/a	n/a	n/a	n/a	n/a	n/a	n/a	n/a
11090501_E04	Extract	2014-11-19	1.02288	0.90092	0.961901	2014-12-05	0.961105	1.07685	0.848492	0.848492	0.937343	0.892918	no	no	n/a	n/a	n/a	n/a	n/a	n/a	n/a	n/a	n/a
11090301_B11	Extract	2014-11-19	0.948837	0.974436	0.961636	2014-12-05	0.992964	1.0394	0.849614	0.849614	0.915845	0.882729	no	no	n/a	n/a	n/a	n/a	n/a	n/a	n/a	n/a	n/a
11020711_F06	Extract	2014-11-24	0.979482	0.943619	0.96155	2014-12-05	0.804799	0.922831	0.773244	0.773244	0.861409	0.817326	no	no	n/a	n/a	n/a	n/a	n/a	n/a	n/a	n/a	n/a
11090302_G06	Extract	2014-11-19	0.95571	0.966853	0.961282	2014-12-05	0.89384	1.03675	0.873521	0.873521	0.886889	0.880205	no	no	n/a	n/a	n/a	n/a	n/a	n/a	n/a	n/a	n/a
11090206_A03	Extract	2014-11-19	1.02138	0.900799	0.961091	2014-12-04	0.974927	0.931485	0.945919	0.945919	0.857057	0.901488	no	no	n/a	n/a	n/a	n/a	n/a	n/a	n/a	n/a	n/a
11010341_G07	Extract	2014-11-25	0.998942	0.92314	0.961041	2014-12-05	0.967654	0.97831	0.975763	0.975763	1.01852	0.997139	no	no	n/a	n/a	n/a	n/a	n/a	n/a	n/a	n/a	n/a
11100804_B03	Extract	2014-11-19	0.902505	1.01955	0.961026	2014-11-20	1.09389	1.18459	0.914488	0.914488	0.919978	0.917233	no	no	n/a	n/a	n/a	n/a	n/a	n/a	n/a	n/a	n/a
11090206_C08	Extract	2014-11-19	0.952	0.969821	0.96091	2014-12-04	0.998087	1.04686	0.961578	0.961578	0.977567	0.969572	no	no	n/a	n/a	n/a	n/a	n/a	n/a	n/a	n/a	n/a
11010353_A12	Extract	2014-11-25	0.938654	0.983101	0.960878	2014-12-05	0.861839	0.953633	0.85145	0.85145	1.12193	0.986688	no	no	n/a	n/a	n/a	n/a	n/a	n/a	n/a	n/a	n/a
11010341_A10	Extract	2014-11-25	0.951242	0.97048	0.960861	2014-12-05	0.999559	1.01148	0.914899	0.914899	1.01948	0.967191	no	no	n/a	n/a	n/a	n/a	n/a	n/a	n/a	n/a	n/a
11020709_D10	Extract	2014-11-24	1.0748	0.846883	0.960843	2014-12-05	0.877158	1.21282	0.868972	0.868972	0.960697	0.914834	no	no	n/a	n/a	n/a	n/a	n/a	n/a	n/a	n/a	n/a
11100905_D05	Extract	2014-11-19	0.946148	0.974819	0.960483	2014-12-04	0.918096	0.912646	0.761791	0.761791	0.795181	0.778486	no	no	n/a	n/a	n/a	n/a	n/a	n/a	n/a	n/a	n/a
11010402_B04	Extract	2014-11-25	0.970455	0.949997	0.960226	2014-12-05	1.05636	0.888258	0.896575	0.896575	0.802107	0.849341	no	no	n/a	n/a	n/a	n/a	n/a	n/a	n/a	n/a	n/a
11090201_E03	Extract	2014-11-19	0.951279	0.969165	0.960222	2014-12-04	0.973911	0.822061	0.868558	0.868558	0.918843	0.8937	no	no	n/a	n/a	n/a	n/a	n/a	n/a	n/a	n/a	n/a
11040302_F07	Extract	2014-11-19	0.881102	1.03918	0.960143	2014-12-05	0.918571	1.06856	0.910585	0.910585	0.818613	0.864599	no	no	n/a	n/a	n/a	n/a	n/a	n/a	n/a	n/a	n/a
11100805_G06	Extract	2014-11-19	1.06121	0.858699	0.959954	2014-11-20	1.0775	0.951331	0.956578	0.956578	1.10509	1.03083	no	no	n/a	n/a	n/a	n/a	n/a	n/a	n/a	n/a	n/a
11090501_F03	Extract	2014-11-19	1.01224	0.906903	0.959572	2014-12-05	0.924967	1.01421	0.863403	0.863403	0.846196	0.854799	no	no	n/a	n/a	n/a	n/a	n/a	n/a	n/a	n/a	n/a
11010416_E06	Extract	2014-11-25	1.05515	0.863655	0.959402	2014-12-05	0.957266	0.963145	0.909995	0.909995	0.705431	0.807713	no	no	n/a	n/a	n/a	n/a	n/a	n/a	n/a	n/a	n/a
11090301_F09	Extract	2014-11-19	1.00292	0.915627	0.959275	2014-12-05	0.975853	1.00436	0.885068	0.885068	0.97314	0.929104	no	no	n/a	n/a	n/a	n/a	n/a	n/a	n/a	n/a	n/a
11010416_D12	Extract	2014-11-25	1.04075	0.877466	0.959108	2014-12-05	0.96062	0.818408	0.914299	0.914299	0.814817	0.864558	no	no	n/a	n/a	n/a	n/a	n/a	n/a	n/a	n/a	n/a
11010353_B10	Extract	2014-11-25	0.975164	0.942477	0.95882	2014-12-05	1.08904	0.879892	0.91994	0.91994	0.767169	0.843555	no	no	n/a	n/a	n/a	n/a	n/a	n/a	n/a	n/a	n/a
11020901_F09	Extract	2014-11-24	1.05888	0.858419	0.958648	2014-12-05	0.645774	0.889761	0.484524	0.484524	0.679423	0.581974	no	no	n/a	n/a	n/a	n/a	n/a	n/a	n/a	n/a	n/a
11040303_A04	Extract	2014-11-19	1.01119	0.905582	0.958384	2014-12-05	1.08708	1.06227	0.947166	0.947166	0.988701	0.967933	no	no	n/a	n/a	n/a	n/a	n/a	n/a	n/a	n/a	n/a
11090205_B02	Extract	2014-11-19	1.15421	0.761969	0.958089	2014-12-04	1.07359	1.0622	0.992897	0.992897	0.991396	0.992146	no	no	n/a	n/a	n/a	n/a	n/a	n/a	n/a	n/a	n/a
11100205_B10	Extract	2014-11-19	1.14164	0.774282	0.957959	2014-11-21	0.881288	1.10069	0.792794	0.792794	0.965712	0.879253	no	no	n/a	n/a	n/a	n/a	n/a	n/a	n/a	n/a	n/a
11010119_A04	Extract	2014-11-25	0.942104	0.973199	0.957652	2014-12-05	1.00847	0.836951	0.816423	0.816423	0.927613	0.872018	no	no	n/a	n/a	n/a	n/a	n/a	n/a	n/a	n/a	n/a
11010416_F09	Extract	2014-11-25	0.974338	0.940949	0.957643	2014-12-05	0.884928	0.850499	0.527364	0.527364	0.401801	0.464583	no	no	n/a	n/a	n/a	n/a	n/a	n/a	n/a	n/a	n/a
11100805_A02	Extract	2014-11-19	1.00148	0.913235	0.957356	2014-11-20	1.09587	1.10366	0.875562	0.875562	0.953161	0.914361	no	no	n/a	n/a	n/a	n/a	n/a	n/a	n/a	n/a	n/a
11100303_A02	Extract	2014-11-19	0.977526	0.93703	0.957278	2014-12-04	1.09196	0.876126	1.13597	1.13597	0.869827	1.0029	no	no	n/a	n/a	n/a	n/a	n/a	n/a	n/a	n/a	n/a
11010119_D06	Extract	2014-11-25	0.931331	0.982947	0.957139	2014-12-05	1.04977	1.03559	0.968763	0.968763	0.996837	0.9828	no	no	n/a	n/a	n/a	n/a	n/a	n/a	n/a	n/a	n/a
11020901_B04	Extract	2014-11-24	1.05647	0.857793	0.957133	2014-12-05	0.984348	1.16293	0.893436	0.893436	0.937087	0.915262	no	no	n/a	n/a	n/a	n/a	n/a	n/a	n/a	n/a	n/a
11010535_B06	Extract	2014-11-25	1.0975	0.81671	0.957103	2014-12-05	1.04857	1.01087	0.857358	0.857358	0.78911	0.823234	no	no	n/a	n/a	n/a	n/a	n/a	n/a	n/a	n/a	n/a
11090204_G06	Extract	2014-11-19	0.999866	0.914215	0.95704	2014-12-04	0.913916	0.954255	0.95406	0.95406	1.00622	0.980142	no	no	n/a	n/a	n/a	n/a	n/a	n/a	n/a	n/a	n/a
11040208_D06	Extract	2014-11-19	0.904254	1.00961	0.95693	2014-12-05	0.929391	1.0756	0.812674	0.812674	0.713776	0.763225	no	no	n/a	n/a	n/a	n/a	n/a	n/a	n/a	n/a	n/a
11100805_F09	Extract	2014-11-19	0.981074	0.932554	0.956814	2014-11-20	1.11007	1.01837	0.744249	0.744249	1.04233	0.893291	no	no	n/a	n/a	n/a	n/a	n/a	n/a	n/a	n/a	n/a
11090302_C02	Extract	2014-11-19	0.98164	0.931934	0.956787	2014-12-05	0.650474	0.908653	0.822035	0.822035	0.880048	0.851041	no	no	n/a	n/a	n/a	n/a	n/a	n/a	n/a	n/a	n/a
11100702_E11	Extract	2014-11-19	0.993492	0.920074	0.956783	2014-11-20	1.17614	1.18896	0.93512	0.93512	0.881835	0.908478	no	no	n/a	n/a	n/a	n/a	n/a	n/a	n/a	n/a	n/a
11010535_B12	Extract	2014-11-25	0.981524	0.931632	0.956578	2014-12-05	0.952339	0.786991	0.881257	0.881257	0.738327	0.809792	no	no	n/a	n/a	n/a	n/a	n/a	n/a	n/a	n/a	n/a
11090205_C02	Extract	2014-11-19	0.983421	0.928504	0.955963	2014-12-04	0.974679	0.922529	0.908642	0.908642	0.955102	0.931872	no	no	n/a	n/a	n/a	n/a	n/a	n/a	n/a	n/a	n/a
11100905_G05	Extract	2014-11-19	0.915244	0.996246	0.955745	2014-12-04	0.927853	0.957915	0.863327	0.863327	0.788494	0.82591	no	no	n/a	n/a	n/a	n/a	n/a	n/a	n/a	n/a	n/a
11010402_H06	Extract	2014-11-25	0.907376	1.00356	0.955469	2014-12-05	0.801729	1.01314	0.746228	0.746228	0.793739	0.769984	no	no	n/a	n/a	n/a	n/a	n/a	n/a	n/a	n/a	n/a
11040303_D12	Extract	2014-11-19	0.999415	0.911452	0.955433	2014-12-05	1.13578	1.03921	0.739267	0.739267	0.924114	0.83169	no	no	n/a	n/a	n/a	n/a	n/a	n/a	n/a	n/a	n/a
11020709_F03	Extract	2014-11-24	1.01591	0.893676	0.954792	2014-12-05	0.808951	1.06322	0.667376	0.667376	0.964526	0.815951	no	no	n/a	n/a	n/a	n/a	n/a	n/a	n/a	n/a	n/a
11010341_G02	Extract	2014-11-25	1.00028	0.908788	0.954535	2014-12-05	1.04555	1.07364	0.919094	0.919094	0.971293	0.945193	no	no	n/a	n/a	n/a	n/a	n/a	n/a	n/a	n/a	n/a
11100303_C11	Extract	2014-11-19	1.04509	0.86382	0.954453	2014-12-04	0.904186	0.944238	1.02415	1.02415	0.952783	0.988468	no	no	n/a	n/a	n/a	n/a	n/a	n/a	n/a	n/a	n/a
11040208_C08	Extract	2014-11-19	0.944068	0.963641	0.953855	2014-12-05	1.07068	1.04505	0.868776	0.868776	0.879848	0.874312	no	no	n/a	n/a	n/a	n/a	n/a	n/a	n/a	n/a	n/a
11010402_D06	Extract	2014-11-25	0.985131	0.922015	0.953573	2014-12-05	0.975918	0.831744	0.76422	0.76422	0.738902	0.751561	no	no	n/a	n/a	n/a	n/a	n/a	n/a	n/a	n/a	n/a
11040302_E08	Extract	2014-11-19	0.915635	0.990902	0.953269	2014-12-05	0.839905	1.03436	0.745592	0.745592	0.774045	0.759819	no	no	n/a	n/a	n/a	n/a	n/a	n/a	n/a	n/a	n/a
11010353_H03	Extract	2014-11-25	1.01586	0.890408	0.953134	2014-12-05	0.822729	0.878093	0.950042	0.950042	0.760814	0.855428	no	no	n/a	n/a	n/a	n/a	n/a	n/a	n/a	n/a	n/a
11010535_H12	Extract	2014-11-25	0.944464	0.961111	0.952787	2014-12-05	0.692938	0.618034	0.776811	0.776811	0.684353	0.730582	no	no	n/a	n/a	n/a	n/a	n/a	n/a	n/a	n/a	n/a
11020901_D08	Extract	2014-11-24	1.01634	0.889044	0.952693	2014-12-05	0.794536	1.04743	0.885116	0.885116	0.918098	0.901607	no	no	n/a	n/a	n/a	n/a	n/a	n/a	n/a	n/a	n/a
11010119_A08	Extract	2014-11-25	0.997308	0.907441	0.952375	2014-12-05	0.951001	0.943553	0.867758	0.867758	0.936375	0.902067	no	no	n/a	n/a	n/a	n/a	n/a	n/a	n/a	n/a	n/a
11020711_E05	Extract	2014-11-24	1.01634	0.88821	0.952275	2014-12-05	0.818344	1.1223	0.953094	0.953094	0.948624	0.950859	no	no	n/a	n/a	n/a	n/a	n/a	n/a	n/a	n/a	n/a
11010416_D04	Extract	2014-11-25	1.00507	0.899426	0.952246	2014-12-05	0.871952	0.879667	0.705166	0.705166	0.737148	0.721157	no	no	n/a	n/a	n/a	n/a	n/a	n/a	n/a	n/a	n/a
11020708_G06	Extract	2014-11-24	1.0194	0.884851	0.952124	2014-12-05	1.09882	0.984349	0.693258	0.693258	0.954775	0.824017	no	no	n/a	n/a	n/a	n/a	n/a	n/a	n/a	n/a	n/a
11090206_E03	Extract	2014-11-19	0.964093	0.939931	0.952012	2014-12-04	0.825039	0.745686	0.790262	0.790262	0.906423	0.848343	no	no	n/a	n/a	n/a	n/a	n/a	n/a	n/a	n/a	n/a
11090206_A08	Extract	2014-11-19	0.960703	0.94323	0.951967	2014-12-04	0.959965	1.06297	0.986003	0.986003	1.03939	1.01269	no	no	n/a	n/a	n/a	n/a	n/a	n/a	n/a	n/a	n/a
11010416_E10	Extract	2014-11-25	1.01253	0.891307	0.951917	2014-12-05	0.912661	0.919697	0.738449	0.738449	0.74034	0.739395	no	no	n/a	n/a	n/a	n/a	n/a	n/a	n/a	n/a	n/a
11001218_B02	Extract	2014-11-25	0.994628	0.909057	0.951842	2014-12-05	1.07184	1.03305	1.07991	1.07991	1.03114	1.05552	no	no	n/a	n/a	n/a	n/a	n/a	n/a	n/a	n/a	n/a
11090204_C05	Extract	2014-11-19	0.941109	0.962567	0.951838	2014-12-04	1.01302	0.949904	0.887025	0.887025	0.883305	0.885165	no	no	n/a	n/a	n/a	n/a	n/a	n/a	n/a	n/a	n/a
11010341_A09	Extract	2014-11-25	1.01052	0.893089	0.951804	2014-12-05	1.00261	0.991771	0.997236	0.997236	0.946071	0.971653	no	no	n/a	n/a	n/a	n/a	n/a	n/a	n/a	n/a	n/a
11010535_H02	Extract	2014-11-25	0.927585	0.975582	0.951583	2014-12-05	0.843703	0.888483	0.755879	0.755879	0.864765	0.810322	no	no	n/a	n/a	n/a	n/a	n/a	n/a	n/a	n/a	n/a
11100206_G10	Extract	2014-11-19	1.03724	0.865593	0.951417	2014-11-21	1.03849	1.03357	0.930236	0.930236	1.03764	0.983938	no	no	n/a	n/a	n/a	n/a	n/a	n/a	n/a	n/a	n/a
11040303_B02	Extract	2014-11-19	0.943289	0.959363	0.951326	2014-12-05	1.0028	0.980024	0.902864	0.902864	0.998121	0.950493	no	no	n/a	n/a	n/a	n/a	n/a	n/a	n/a	n/a	n/a
11010535_A11	Extract	2014-11-25	0.982625	0.919888	0.951257	2014-12-05	0.896331	0.96382	0.890133	0.890133	0.800669	0.845401	no	no	n/a	n/a	n/a	n/a	n/a	n/a	n/a	n/a	n/a
11100905_B10	Extract	2014-11-19	1.00919	0.893005	0.951096	2014-12-04	1.10834	1.01469	0.905894	0.905894	0.879638	0.892766	no	no	n/a	n/a	n/a	n/a	n/a	n/a	n/a	n/a	n/a
11010535_C11	Extract	2014-11-25	0.889121	1.01288	0.951001	2014-12-05	0.951539	0.99436	0.939028	0.939028	0.7207	0.829864	no	no	n/a	n/a	n/a	n/a	n/a	n/a	n/a	n/a	n/a
11090301_B05	Extract	2014-11-19	1.03042	0.871527	0.950971	2014-12-05	1.02957	1.01805	0.87467	0.87467	1.00897	0.94182	no	no	n/a	n/a	n/a	n/a	n/a	n/a	n/a	n/a	n/a
11040209_F07	Extract	2014-11-19	0.874242	1.02743	0.950835	2014-12-05	0.983071	1.02635	0.733791	0.733791	0.772234	0.753012	no	no	n/a	n/a	n/a	n/a	n/a	n/a	n/a	n/a	n/a
11090201_G08	Extract	2014-11-19	0.930964	0.969821	0.950392	2014-12-04	0.981392	0.943264	0.8388	0.8388	0.974815	0.906807	no	no	n/a	n/a	n/a	n/a	n/a	n/a	n/a	n/a	n/a
11090205_A10	Extract	2014-11-19	1.04098	0.859723	0.950349	2014-12-04	1.06311	0.937107	0.932755	0.932755	0.939931	0.936343	no	no	n/a	n/a	n/a	n/a	n/a	n/a	n/a	n/a	n/a
11010353_B03	Extract	2014-11-25	0.966022	0.933729	0.949876	2014-12-05	0.932371	0.924217	0.914567	0.914567	0.733123	0.823845	no	no	n/a	n/a	n/a	n/a	n/a	n/a	n/a	n/a	n/a
11001218_H07	Extract	2014-11-25	0.988411	0.911211	0.949811	2014-12-05	0.894234	0.94724	0.879481	0.879481	0.921171	0.900326	no	no	n/a	n/a	n/a	n/a	n/a	n/a	n/a	n/a	n/a
11090206_C11	Extract	2014-11-19	0.908245	0.991364	0.949805	2014-12-04	0.958727	0.992366	0.947167	0.947167	1.00003	0.973599	no	no	n/a	n/a	n/a	n/a	n/a	n/a	n/a	n/a	n/a
11001218_B08	Extract	2014-11-25	0.979005	0.920421	0.949713	2014-12-05	0.918163	0.976927	0.807784	0.807784	0.950258	0.879021	no	no	n/a	n/a	n/a	n/a	n/a	n/a	n/a	n/a	n/a
11010402_F10	Extract	2014-11-25	0.982625	0.916593	0.949609	2014-12-05	0.94171	0.864757	0.826214	0.826214	0.705718	0.765966	no	no	n/a	n/a	n/a	n/a	n/a	n/a	n/a	n/a	n/a
11040208_A08	Extract	2014-11-19	0.905228	0.993926	0.949577	2014-12-05	0.938577	0.959404	0.864368	0.864368	0.98082	0.922594	no	no	n/a	n/a	n/a	n/a	n/a	n/a	n/a	n/a	n/a
11090301_D10	Extract	2014-11-19	0.966351	0.93239	0.949371	2014-12-05	0.91523	1.10204	0.854098	0.854098	0.959489	0.906793	no	no	n/a	n/a	n/a	n/a	n/a	n/a	n/a	n/a	n/a
11010119_H10	Extract	2014-11-25	0.949098	0.949637	0.949368	2014-12-05	0.884392	0.751025	0.855202	0.855202	1.04699	0.951097	no	no	n/a	n/a	n/a	n/a	n/a	n/a	n/a	n/a	n/a
11010341_H07	Extract	2014-11-25	0.963382	0.934773	0.949077	2014-12-05	0.917464	0.869151	0.825062	0.825062	0.881711	0.853387	no	no	n/a	n/a	n/a	n/a	n/a	n/a	n/a	n/a	n/a
11100806_E09	Extract	2014-11-19	0.949333	0.948672	0.949003	2014-11-20	1.15618	1.11265	1.02702	1.02702	1.09557	1.06129	no	no	n/a	n/a	n/a	n/a	n/a	n/a	n/a	n/a	n/a
11040303_A03	Extract	2014-11-19	0.913277	0.983583	0.94843	2014-12-05	0.981936	1.03728	0.888024	0.888024	0.919554	0.903789	no	no	n/a	n/a	n/a	n/a	n/a	n/a	n/a	n/a	n/a
11100304_E07	Extract	2014-11-19	1.00678	0.889892	0.948336	2014-12-04	0.919489	0.885717	0.954323	0.954323	0.777944	0.866134	no	no	n/a	n/a	n/a	n/a	n/a	n/a	n/a	n/a	n/a
11090301_H02	Extract	2014-11-19	0.962143	0.933989	0.948066	2014-12-05	0.99866	0.91705	0.868476	0.868476	0.893083	0.880779	no	no	n/a	n/a	n/a	n/a	n/a	n/a	n/a	n/a	n/a
11010416_F03	Extract	2014-11-25	0.998127	0.897629	0.947878	2014-12-05	1.07761	1.05117	0.793198	0.793198	0.720988	0.757093	no	no	n/a	n/a	n/a	n/a	n/a	n/a	n/a	n/a	n/a
11100805_A11	Extract	2014-11-19	0.810481	1.08502	0.947752	2014-11-20	1.01812	1.0848	0.97835	0.97835	0.974681	0.976515	no	no	n/a	n/a	n/a	n/a	n/a	n/a	n/a	n/a	n/a
11020711_B08	Extract	2014-11-24	1.06804	0.827356	0.9477	2014-12-05	0.779882	1.04109	0.636058	0.636058	0.798594	0.717326	no	no	n/a	n/a	n/a	n/a	n/a	n/a	n/a	n/a	n/a
11010402_A06	Extract	2014-11-25	0.975439	0.919888	0.947664	2014-12-05	0.966321	0.920147	0.947609	0.947609	0.794314	0.870962	no	no	n/a	n/a	n/a	n/a	n/a	n/a	n/a	n/a	n/a
11020711_C10	Extract	2014-11-24	1.02005	0.875192	0.947619	2014-12-05	0.808951	1.12461	0.725995	0.725995	0.957353	0.841674	no	no	n/a	n/a	n/a	n/a	n/a	n/a	n/a	n/a	n/a
11040208_H08	Extract	2014-11-19	0.96075	0.934064	0.947407	2014-12-05	0.804348	0.94679	0.803063	0.803063	0.769214	0.786139	no	no	n/a	n/a	n/a	n/a	n/a	n/a	n/a	n/a	n/a
11020709_E06	Extract	2014-11-24	0.924985	0.969654	0.947319	2014-12-05	0.964432	1.07899	0.92837	0.92837	0.96838	0.948375	no	no	n/a	n/a	n/a	n/a	n/a	n/a	n/a	n/a	n/a
11090201_B02	Extract	2014-11-19	1.02405	0.870254	0.947152	2014-12-04	1.03893	0.948123	0.979421	0.979421	1.00416	0.99179	no	no	n/a	n/a	n/a	n/a	n/a	n/a	n/a	n/a	n/a
11040302_G07	Extract	2014-11-19	0.917973	0.976282	0.947128	2014-12-05	0.989186	1.04673	0.795616	0.795616	0.872873	0.834244	no	no	n/a	n/a	n/a	n/a	n/a	n/a	n/a	n/a	n/a
11010353_E11	Extract	2014-11-25	0.957459	0.936755	0.947107	2014-12-05	0.964515	1.00048	0.877515	0.877515	0.918481	0.897998	no	no	n/a	n/a	n/a	n/a	n/a	n/a	n/a	n/a	n/a
11020711_F09	Extract	2014-11-24	0.979916	0.914245	0.94708	2014-12-05	0.895747	1.13366	0.838079	0.838079	0.837059	0.837569	no	no	n/a	n/a	n/a	n/a	n/a	n/a	n/a	n/a	n/a
11010216_F04	Extract	2014-11-25	0.922971	0.971018	0.946994	2014-12-05	0.920729	1.02284	0.890898	0.890898	0.906933	0.898916	no	no	n/a	n/a	n/a	n/a	n/a	n/a	n/a	n/a	n/a
11100807_F12	Extract	2014-11-19	0.969315	0.923941	0.946628	2014-12-04	1.00537	0.935392	0.811493	0.811493	1.0021	0.906797	no	no	n/a	n/a	n/a	n/a	n/a	n/a	n/a	n/a	n/a
11010416_A08	Extract	2014-11-25	0.923703	0.968961	0.946332	2014-12-05	0.929765	0.861811	0.800443	0.800443	0.726768	0.763605	no	no	n/a	n/a	n/a	n/a	n/a	n/a	n/a	n/a	n/a
11090301_H08	Extract	2014-11-19	0.900524	0.991884	0.946204	2014-12-05	1.00199	0.898587	0.822876	0.822876	0.931798	0.877337	no	no	n/a	n/a	n/a	n/a	n/a	n/a	n/a	n/a	n/a
11040208_B08	Extract	2014-11-19	0.891099	1.00123	0.946163	2014-12-05	0.826568	0.934659	0.721141	0.721141	0.908956	0.815049	no	no	n/a	n/a	n/a	n/a	n/a	n/a	n/a	n/a	n/a
11100906_F05	Extract	2014-11-19	0.978465	0.913765	0.946115	2014-12-04	0.921724	1.00634	0.918609	0.918609	0.810069	0.864339	no	no	n/a	n/a	n/a	n/a	n/a	n/a	n/a	n/a	n/a
11090206_A02	Extract	2014-11-19	0.984407	0.907616	0.946012	2014-12-04	0.992861	0.995419	0.934315	0.934315	1.01417	0.974243	no	no	n/a	n/a	n/a	n/a	n/a	n/a	n/a	n/a	n/a
11090204_F07	Extract	2014-11-19	0.932671	0.959268	0.945969	2014-12-04	0.85142	0.898004	0.846941	0.846941	0.812884	0.829913	no	no	n/a	n/a	n/a	n/a	n/a	n/a	n/a	n/a	n/a
11010216_B02	Extract	2014-11-25	0.964989	0.92691	0.94595	2014-12-05	1.10493	1.0741	0.968763	0.968763	0.946393	0.957578	no	no	n/a	n/a	n/a	n/a	n/a	n/a	n/a	n/a	n/a
11100805_H09	Extract	2014-11-19	0.909166	0.98249	0.945828	2014-11-20	0.988867	1.06812	0.921071	0.921071	0.997456	0.959264	no	no	n/a	n/a	n/a	n/a	n/a	n/a	n/a	n/a	n/a
11040302_F04	Extract	2014-11-19	0.923664	0.967195	0.945429	2014-12-05	0.913286	1.00742	0.759337	0.759337	0.75922	0.759278	no	no	n/a	n/a	n/a	n/a	n/a	n/a	n/a	n/a	n/a
11100205_A05	Extract	2014-11-19	1.05051	0.840129	0.945318	2014-11-21	0.994812	0.919435	0.859139	0.859139	0.968236	0.913688	no	no	n/a	n/a	n/a	n/a	n/a	n/a	n/a	n/a	n/a
11010119_E07	Extract	2014-11-25	1.01968	0.870658	0.945171	2014-12-05	1.09555	1.04557	0.986374	0.986374	0.993294	0.989834	no	no	n/a	n/a	n/a	n/a	n/a	n/a	n/a	n/a	n/a
11090301_C11	Extract	2014-11-19	0.945951	0.944335	0.945143	2014-12-05	0.914521	1.02452	0.884507	0.884507	0.876157	0.880332	no	no	n/a	n/a	n/a	n/a	n/a	n/a	n/a	n/a	n/a
11090501_D08	Extract	2014-11-19	0.984086	0.906195	0.94514	2014-12-05	0.780559	1.05453	0.831592	0.831592	0.915845	0.873719	no	no	n/a	n/a	n/a	n/a	n/a	n/a	n/a	n/a	n/a
11010216_A10	Extract	2014-11-25	0.949902	0.940186	0.945044	2014-12-05	0.979618	0.973447	0.929983	0.929983	0.991361	0.960672	no	no	n/a	n/a	n/a	n/a	n/a	n/a	n/a	n/a	n/a
11010535_F06	Extract	2014-11-25	0.986232	0.903351	0.944791	2014-12-05	0.874815	0.914727	0.755879	0.755879	0.700514	0.728196	no	no	n/a	n/a	n/a	n/a	n/a	n/a	n/a	n/a	n/a
11020711_F07	Extract	2014-11-24	0.969233	0.920107	0.94467	2014-12-05	0.724612	1.03514	0.637476	0.637476	0.876034	0.756755	no	no	n/a	n/a	n/a	n/a	n/a	n/a	n/a	n/a	n/a
11001218_F06	Extract	2014-11-25	0.988143	0.900952	0.944547	2014-12-05	0.988527	1.00661	0.953429	0.953429	1.04019	0.996812	no	no	n/a	n/a	n/a	n/a	n/a	n/a	n/a	n/a	n/a
11040209_C12	Extract	2014-11-19	0.907196	0.981815	0.944506	2014-12-05	0.985008	1.038	0.899305	0.899305	0.960197	0.929751	no	no	n/a	n/a	n/a	n/a	n/a	n/a	n/a	n/a	n/a
11090301_F11	Extract	2014-11-19	1.02976	0.859126	0.94444	2014-12-05	0.945411	1.09582	0.849614	0.849614	0.946454	0.898034	no	no	n/a	n/a	n/a	n/a	n/a	n/a	n/a	n/a	n/a
11090301_G02	Extract	2014-11-19	0.99184	0.896557	0.944199	2014-12-05	0.959214	0.994053	0.895214	0.895214	0.902842	0.899028	no	no	n/a	n/a	n/a	n/a	n/a	n/a	n/a	n/a	n/a
11090206_E10	Extract	2014-11-19	1.02549	0.862345	0.943919	2014-12-04	1.01377	0.949141	0.917096	0.917096	0.979631	0.948363	no	no	n/a	n/a	n/a	n/a	n/a	n/a	n/a	n/a	n/a
11100805_F03	Extract	2014-11-19	0.936672	0.951072	0.943872	2014-11-20	1.21783	1.18874	0.808053	0.808053	0.975293	0.891673	no	no	n/a	n/a	n/a	n/a	n/a	n/a	n/a	n/a	n/a
11020709_B05	Extract	2014-11-24	0.952006	0.935649	0.943828	2014-12-05	0.827759	1.14156	0.981623	0.981623	0.970447	0.976035	no	no	n/a	n/a	n/a	n/a	n/a	n/a	n/a	n/a	n/a
11090205_F05	Extract	2014-11-19	0.954909	0.932459	0.943684	2014-12-04	0.930587	0.962422	0.869494	0.869494	0.976535	0.923014	no	no	n/a	n/a	n/a	n/a	n/a	n/a	n/a	n/a	n/a
11100206_F10	Extract	2014-11-19	0.920109	0.966843	0.943476	2014-11-21	1.03499	1.0624	0.893761	0.893761	0.974921	0.934341	no	no	n/a	n/a	n/a	n/a	n/a	n/a	n/a	n/a	n/a
11010341_H06	Extract	2014-11-25	0.96231	0.924217	0.943264	2014-12-05	0.91863	0.69361	0.910732	0.910732	0.872015	0.891374	no	no	n/a	n/a	n/a	n/a	n/a	n/a	n/a	n/a	n/a
11090301_A11	Extract	2014-11-19	0.995608	0.890825	0.943216	2014-12-05	0.947326	0.985179	0.930107	0.930107	1.1435	1.0368	no	no	n/a	n/a	n/a	n/a	n/a	n/a	n/a	n/a	n/a
11010341_G06	Extract	2014-11-25	0.950438	0.935581	0.94301	2014-12-05	1.04014	1.12446	1.03996	1.03996	0.929256	0.984608	no	no	n/a	n/a	n/a	n/a	n/a	n/a	n/a	n/a	n/a
11001218_H02	Extract	2014-11-25	0.993529	0.892012	0.94277	2014-12-05	0.986172	0.953049	0.871925	0.871925	0.925681	0.898803	no	no	n/a	n/a	n/a	n/a	n/a	n/a	n/a	n/a	n/a
11010416_H09	Extract	2014-11-25	0.950548	0.934957	0.942753	2014-12-05	0.825567	0.829023	0.770101	0.770101	0.674547	0.722324	no	no	n/a	n/a	n/a	n/a	n/a	n/a	n/a	n/a	n/a
11020711_G05	Extract	2014-11-24	1.0111	0.874149	0.942623	2014-12-05	1.12991	1.0259	0.898896	0.898896	0.856534	0.877715	no	no	n/a	n/a	n/a	n/a	n/a	n/a	n/a	n/a	n/a
11100205_F08	Extract	2014-11-19	1.0388	0.84603	0.942415	2014-11-21	0.853093	0.915261	0.837886	0.837886	0.908292	0.873089	no	no	n/a	n/a	n/a	n/a	n/a	n/a	n/a	n/a	n/a
11100805_A09	Extract	2014-11-19	0.965523	0.919075	0.942299	2014-11-20	1.21184	0.999537	1.0362	1.0362	0.898152	0.967175	no	no	n/a	n/a	n/a	n/a	n/a	n/a	n/a	n/a	n/a
11100305_C05	Extract	2014-11-19	1.02506	0.859247	0.942153	2014-12-04	0.9963	0.863172	0.91901	0.91901	0.8416	0.880305	no	no	n/a	n/a	n/a	n/a	n/a	n/a	n/a	n/a	n/a
11090206_A04	Extract	2014-11-19	1.09468	0.789434	0.942058	2014-12-04	0.922611	1.0159	0.936841	0.936841	0.884337	0.910589	no	no	n/a	n/a	n/a	n/a	n/a	n/a	n/a	n/a	n/a
11010402_C10	Extract	2014-11-25	0.96437	0.918989	0.94168	2014-12-05	0.809236	0.866556	0.791862	0.791862	0.756213	0.774037	no	no	n/a	n/a	n/a	n/a	n/a	n/a	n/a	n/a	n/a
11100906_E09	Extract	2014-11-19	1.02648	0.856003	0.941239	2014-12-04	0.860097	0.950034	0.825761	0.825761	0.82523	0.825495	no	no	n/a	n/a	n/a	n/a	n/a	n/a	n/a	n/a	n/a
11001218_H04	Extract	2014-11-25	1.02802	0.854421	0.941219	2014-12-05	1.0817	1.01542	1.01679	1.01679	0.918884	0.967838	no	no	n/a	n/a	n/a	n/a	n/a	n/a	n/a	n/a	n/a
11020708_D04	Extract	2014-11-24	0.983404	0.898912	0.941158	2014-12-05	0.920251	1.16755	0.835715	0.835715	0.939385	0.88755	no	no	n/a	n/a	n/a	n/a	n/a	n/a	n/a	n/a	n/a
11010416_C03	Extract	2014-11-25	1.00892	0.873272	0.941096	2014-12-05	0.996428	0.979202	0.875082	0.875082	0.805845	0.840464	no	no	n/a	n/a	n/a	n/a	n/a	n/a	n/a	n/a	n/a
11020709_D09	Extract	2014-11-24	0.956578	0.924947	0.940763	2014-12-05	0.825998	1.17545	0.84569	0.84569	0.92065	0.88317	no	no	n/a	n/a	n/a	n/a	n/a	n/a	n/a	n/a	n/a
11020901_C04	Extract	2014-11-24	0.919957	0.960621	0.940289	2014-12-05	1.02877	1.07707	0.872777	0.872777	0.918098	0.895437	no	no	n/a	n/a	n/a	n/a	n/a	n/a	n/a	n/a	n/a
11090201_F04	Extract	2014-11-19	1.02624	0.854217	0.940228	2014-12-04	0.860634	0.759221	0.832218	0.832218	0.752475	0.792346	no	no	n/a	n/a	n/a	n/a	n/a	n/a	n/a	n/a	n/a
11010416_D08	Extract	2014-11-25	0.995649	0.884087	0.939868	2014-12-05	0.852784	0.846429	0.667339	0.667339	0.697351	0.682345	no	no	n/a	n/a	n/a	n/a	n/a	n/a	n/a	n/a	n/a
11100205_C07	Extract	2014-11-19	0.881452	0.997601	0.939527	2014-11-21	1.00228	1.43159	1.10298	1.10298	1.34937	1.22617	no	no	n/a	n/a	n/a	n/a	n/a	n/a	n/a	n/a	n/a
11100102_D11	Extract	2014-11-19	1.0755	0.803513	0.939508	2014-11-21	1.14837	1.12204	0.96987	0.96987	1.0198	0.994837	no	no	n/a	n/a	n/a	n/a	n/a	n/a	n/a	n/a	n/a
11090206_A11	Extract	2014-11-19	0.810639	1.06834	0.939489	2014-12-04	0.935814	0.975982	0.965009	0.965009	0.960985	0.962997	no	no	n/a	n/a	n/a	n/a	n/a	n/a	n/a	n/a	n/a
11100806_C07	Extract	2014-11-19	1.06077	0.818062	0.939415	2014-11-20	1.01988	0.954837	0.779442	0.779442	0.881529	0.830486	no	no	n/a	n/a	n/a	n/a	n/a	n/a	n/a	n/a	n/a
11100303_D04	Extract	2014-11-19	0.998866	0.879836	0.939351	2014-12-04	1.01687	0.918091	1.01226	1.01226	0.997223	1.00474	no	no	n/a	n/a	n/a	n/a	n/a	n/a	n/a	n/a	n/a
11090201_C02	Extract	2014-11-19	1.03446	0.844122	0.939291	2014-12-04	0.957736	0.9655	0.883906	0.883906	0.900885	0.892395	no	no	n/a	n/a	n/a	n/a	n/a	n/a	n/a	n/a	n/a
11010416_H03	Extract	2014-11-25	0.822764	1.05563	0.939198	2014-12-05	0.846824	0.811841	0.711876	0.711876	0.783617	0.747747	no	no	n/a	n/a	n/a	n/a	n/a	n/a	n/a	n/a	n/a
11010216_A07	Extract	2014-11-25	0.901157	0.9767	0.938928	2014-12-05	1.11596	0.97808	0.85798	0.85798	0.981311	0.919646	no	no	n/a	n/a	n/a	n/a	n/a	n/a	n/a	n/a	n/a
11010535_E10	Extract	2014-11-25	0.93367	0.943675	0.938673	2014-12-05	0.924322	0.949112	1.04166	1.04166	0.789397	0.915527	no	no	n/a	n/a	n/a	n/a	n/a	n/a	n/a	n/a	n/a
11100903_H11	Extract	2014-11-19	0.93617	0.940613	0.938392	2014-12-04	0.972513	0.909064	0.855377	0.855377	1.08511	0.970241	no	no	n/a	n/a	n/a	n/a	n/a	n/a	n/a	n/a	n/a
11010216_E03	Extract	2014-11-25	0.923238	0.953434	0.938336	2014-12-05	1.04812	0.993154	0.984124	0.984124	0.911443	0.947784	no	no	n/a	n/a	n/a	n/a	n/a	n/a	n/a	n/a	n/a
11090302_B03	Extract	2014-11-19	0.974987	0.901605	0.938296	2014-12-05	0.958718	1.091	0.923633	0.923633	0.879399	0.901516	no	no	n/a	n/a	n/a	n/a	n/a	n/a	n/a	n/a	n/a
11090304_B06	Extract	2014-11-19	1.04106	0.835488	0.938273	2014-12-05	0.898355	1.02547	0.777276	0.777276	0.900216	0.838746	no	no	n/a	n/a	n/a	n/a	n/a	n/a	n/a	n/a	n/a
11020709_G03	Extract	2014-11-24	0.948951	0.927033	0.937992	2014-12-05	1.24341	1.09536	1.00635	1.00635	0.920139	0.963243	no	no	n/a	n/a	n/a	n/a	n/a	n/a	n/a	n/a	n/a
11100906_A11	Extract	2014-11-19	0.905892	0.969828	0.93786	2014-12-04	0.900881	0.945758	0.858825	0.858825	0.947996	0.90341	no	no	n/a	n/a	n/a	n/a	n/a	n/a	n/a	n/a	n/a
11040303_E03	Extract	2014-11-19	0.893847	0.980383	0.937115	2014-12-05	1.00335	1.11299	0.860233	0.860233	0.865294	0.862764	no	no	n/a	n/a	n/a	n/a	n/a	n/a	n/a	n/a	n/a
11090304_B12	Extract	2014-11-19	1.00248	0.871527	0.937004	2014-12-05	0.865573	0.946535	0.907321	0.907321	1.01711	0.962215	no	no	n/a	n/a	n/a	n/a	n/a	n/a	n/a	n/a	n/a
11040303_B04	Extract	2014-11-19	0.933681	0.940304	0.936993	2014-12-05	1.01282	1.14721	0.90563	0.90563	0.919554	0.912592	no	no	n/a	n/a	n/a	n/a	n/a	n/a	n/a	n/a	n/a
11020708_D02	Extract	2014-11-24	0.937618	0.936275	0.936946	2014-12-05	0.927905	1.07997	0.961651	0.961651	0.949135	0.955393	no	no	n/a	n/a	n/a	n/a	n/a	n/a	n/a	n/a	n/a
11090206_C06	Extract	2014-11-19	0.97544	0.898396	0.936918	2014-12-04	1.06036	1.12774	0.918656	0.918656	0.949254	0.933955	no	no	n/a	n/a	n/a	n/a	n/a	n/a	n/a	n/a	n/a
11090501_D06	Extract	2014-11-19	0.982301	0.891282	0.936791	2014-12-05	0.970369	1.01781	0.730022	0.730022	0.984554	0.857288	no	no	n/a	n/a	n/a	n/a	n/a	n/a	n/a	n/a	n/a
11010416_F05	Extract	2014-11-25	1.01143	0.861828	0.936627	2014-12-05	1.07088	1.01224	0.731472	0.731472	0.745832	0.738652	no	no	n/a	n/a	n/a	n/a	n/a	n/a	n/a	n/a	n/a
11100206_A03	Extract	2014-11-19	0.993029	0.879905	0.936467	2014-11-21	0.787272	1.1513	0.851019	0.851019	1.02621	0.938615	no	no	n/a	n/a	n/a	n/a	n/a	n/a	n/a	n/a	n/a
11010216_E02	Extract	2014-11-25	0.971448	0.900413	0.935931	2014-12-05	0.961077	1.10125	1.03829	1.03829	0.973226	1.00576	no	no	n/a	n/a	n/a	n/a	n/a	n/a	n/a	n/a	n/a
11020901_F06	Extract	2014-11-24	1.00479	0.866806	0.935799	2014-12-05	0.4784	0.781217	0.491403	0.491403	0.580058	0.53573	no	no	n/a	n/a	n/a	n/a	n/a	n/a	n/a	n/a	n/a
11040303_B12	Extract	2014-11-19	0.976458	0.894533	0.935495	2014-12-05	1.09154	0.956486	0.998887	0.998887	0.942925	0.970906	no	no	n/a	n/a	n/a	n/a	n/a	n/a	n/a	n/a	n/a
11010119_E10	Extract	2014-11-25	0.939398	0.931515	0.935456	2014-12-05	0.951468	0.960009	0.897315	0.897315	1.01787	0.957593	no	no	n/a	n/a	n/a	n/a	n/a	n/a	n/a	n/a	n/a
11010416_A06	Extract	2014-11-25	0.932018	0.938852	0.935435	2014-12-05	1.00835	0.85367	0.831053	0.831053	0.859561	0.845307	no	no	n/a	n/a	n/a	n/a	n/a	n/a	n/a	n/a	n/a
11020901_B09	Extract	2014-11-24	1.00434	0.866388	0.935362	2014-12-05	0.727026	0.942821	0.696095	0.696095	0.748618	0.722356	no	no	n/a	n/a	n/a	n/a	n/a	n/a	n/a	n/a	n/a
11100906_F12	Extract	2014-11-19	0.965861	0.904687	0.935274	2014-12-04	1.01059	0.944639	0.858825	0.858825	1.02095	0.939889	no	no	n/a	n/a	n/a	n/a	n/a	n/a	n/a	n/a	n/a
11100903_C12	Extract	2014-11-19	0.93922	0.931298	0.935259	2014-12-04	1.03554	0.963557	0.882623	0.882623	1.10611	0.994364	no	no	n/a	n/a	n/a	n/a	n/a	n/a	n/a	n/a	n/a
11010216_E11	Extract	2014-11-25	0.920291	0.950176	0.935233	2014-12-05	1.05024	1.01194	0.972679	0.972679	0.968394	0.970537	no	no	n/a	n/a	n/a	n/a	n/a	n/a	n/a	n/a	n/a
11100807_H05	Extract	2014-11-19	0.85265	1.01724	0.934946	2014-12-04	0.936461	0.953415	0.945855	0.945855	0.90666	0.926258	no	no	n/a	n/a	n/a	n/a	n/a	n/a	n/a	n/a	n/a
11010119_G03	Extract	2014-11-25	0.927821	0.942071	0.934946	2014-12-05	1.00378	0.976236	0.981624	0.981624	1.11367	1.04765	no	no	n/a	n/a	n/a	n/a	n/a	n/a	n/a	n/a	n/a
11040208_B12	Extract	2014-11-19	0.960165	0.90949	0.934828	2014-12-05	1.06232	0.987284	0.845667	0.845667	0.905302	0.875485	no	no	n/a	n/a	n/a	n/a	n/a	n/a	n/a	n/a	n/a
11090301_B08	Extract	2014-11-19	0.959698	0.909644	0.934671	2014-12-05	0.756806	1.08332	0.899137	0.899137	0.937667	0.918402	no	no	n/a	n/a	n/a	n/a	n/a	n/a	n/a	n/a	n/a
11040209_G02	Extract	2014-11-19	0.925632	0.943681	0.934657	2014-12-05	0.968876	0.879381	0.95349	0.95349	0.969919	0.961705	no	no	n/a	n/a	n/a	n/a	n/a	n/a	n/a	n/a	n/a
11020708_G08	Extract	2014-11-24	0.970988	0.898286	0.934637	2014-12-05	1.01848	1.16986	0.941678	0.941678	0.951713	0.946695	no	no	n/a	n/a	n/a	n/a	n/a	n/a	n/a	n/a	n/a
11090302_D02	Extract	2014-11-19	1.04661	0.82126	0.933934	2014-12-05	1.02007	1.09317	0.917439	0.917439	0.935721	0.92658	no	no	n/a	n/a	n/a	n/a	n/a	n/a	n/a	n/a	n/a
11040303_A10	Extract	2014-11-19	0.884044	0.983406	0.933725	2014-12-05	1.07012	1.03993	0.870145	0.870145	0.966568	0.918356	no	no	n/a	n/a	n/a	n/a	n/a	n/a	n/a	n/a	n/a
11020708_B07	Extract	2014-11-24	0.955495	0.911095	0.933295	2014-12-05	0.977108	0.974153	0.845926	0.845926	1.0631	0.954513	no	no	n/a	n/a	n/a	n/a	n/a	n/a	n/a	n/a	n/a
11090205_F04	Extract	2014-11-19	0.957073	0.909364	0.933218	2014-12-04	0.736954	0.764081	0.845069	0.845069	0.816669	0.830869	no	no	n/a	n/a	n/a	n/a	n/a	n/a	n/a	n/a	n/a
11020901_C11	Extract	2014-11-24	0.927802	0.938591	0.933196	2014-12-05	0.919142	0.97801	0.851859	0.851859	0.89117	0.871514	no	no	n/a	n/a	n/a	n/a	n/a	n/a	n/a	n/a	n/a
11090205_G08	Extract	2014-11-19	0.933873	0.932	0.932936	2014-12-04	0.90594	0.924336	0.932755	0.932755	0.95063	0.941693	no	no	n/a	n/a	n/a	n/a	n/a	n/a	n/a	n/a	n/a
11010535_A09	Extract	2014-11-25	0.897436	0.968332	0.932884	2014-12-05	1.05375	1.05636	0.971268	0.971268	0.9104	0.940834	no	no	n/a	n/a	n/a	n/a	n/a	n/a	n/a	n/a	n/a
11010119_E08	Extract	2014-11-25	0.940764	0.923679	0.932222	2014-12-05	0.900578	0.814018	0.898454	0.898454	1.04928	0.973866	no	no	n/a	n/a	n/a	n/a	n/a	n/a	n/a	n/a	n/a
11040302_A06	Extract	2014-11-19	0.961919	0.901834	0.931877	2014-12-05	1.00114	0.898772	0.87124	0.87124	0.988399	0.929819	no	no	n/a	n/a	n/a	n/a	n/a	n/a	n/a	n/a	n/a
11090301_A02	Extract	2014-11-19	0.907617	0.956051	0.931834	2014-12-05	0.93116	1.00939	1.0687	1.0687	1.08063	1.07467	no	no	n/a	n/a	n/a	n/a	n/a	n/a	n/a	n/a	n/a
11100302_C11	Extract	2014-11-19	1.04543	0.818034	0.931734	2014-11-21	0.898488	1.0129	0.858878	0.858878	1.00111	0.929992	no	no	n/a	n/a	n/a	n/a	n/a	n/a	n/a	n/a	n/a
11020709_C07	Extract	2014-11-24	1.00347	0.859462	0.931466	2014-12-05	1.05482	1.07285	0.830728	0.830728	0.986604	0.908666	no	no	n/a	n/a	n/a	n/a	n/a	n/a	n/a	n/a	n/a
11090304_A02	Extract	2014-11-19	0.967232	0.895644	0.931438	2014-12-05	1.02839	0.938877	0.965029	0.965029	1.08128	1.02315	no	no	n/a	n/a	n/a	n/a	n/a	n/a	n/a	n/a	n/a
11020901_F05	Extract	2014-11-24	0.98581	0.876882	0.931346	2014-12-05	0.825345	0.991471	0.95144	0.95144	0.945791	0.948615	no	no	n/a	n/a	n/a	n/a	n/a	n/a	n/a	n/a	n/a
11100206_C06	Extract	2014-11-19	0.910159	0.952322	0.931241	2014-11-21	0.863319	0.977696	0.785719	0.785719	0.945934	0.865826	no	no	n/a	n/a	n/a	n/a	n/a	n/a	n/a	n/a	n/a
11010216_C03	Extract	2014-11-25	1.01644	0.84548	0.930961	2014-12-05	1.05024	1.12864	0.886176	0.886176	0.900136	0.893156	no	no	n/a	n/a	n/a	n/a	n/a	n/a	n/a	n/a	n/a
11090302_F08	Extract	2014-11-19	0.983425	0.878424	0.930924	2014-12-05	0.930214	0.948228	0.767438	0.767438	0.813317	0.790378	no	no	n/a	n/a	n/a	n/a	n/a	n/a	n/a	n/a	n/a
11040208_G10	Extract	2014-11-19	0.888566	0.973259	0.930912	2014-12-05	0.938854	0.980989	0.85859	0.85859	0.881962	0.870276	no	no	n/a	n/a	n/a	n/a	n/a	n/a	n/a	n/a	n/a
11010119_E06	Extract	2014-11-25	0.926481	0.935312	0.930896	2014-12-05	0.872894	1.09337	0.910732	0.910732	0.90368	0.907206	no	no	n/a	n/a	n/a	n/a	n/a	n/a	n/a	n/a	n/a
11040208_H11	Extract	2014-11-19	0.936819	0.923916	0.930367	2014-12-05	0.877149	0.949226	0.870966	0.870966	0.975052	0.923009	no	no	n/a	n/a	n/a	n/a	n/a	n/a	n/a	n/a	n/a
11010216_E09	Extract	2014-11-25	0.913564	0.946945	0.930255	2014-12-05	1.02489	1.03536	0.915177	0.915177	0.996515	0.955846	no	no	n/a	n/a	n/a	n/a	n/a	n/a	n/a	n/a	n/a
11010353_G03	Extract	2014-11-25	0.980147	0.879893	0.93002	2014-12-05	0.973338	0.959974	0.957286	0.957286	0.79604	0.876663	no	no	n/a	n/a	n/a	n/a	n/a	n/a	n/a	n/a	n/a
11010402_E09	Extract	2014-11-25	1.02249	0.837471	0.929983	2014-12-05	1.0714	0.810042	0.804747	0.804747	0.738615	0.771681	no	no	n/a	n/a	n/a	n/a	n/a	n/a	n/a	n/a	n/a
11010402_D03	Extract	2014-11-25	0.932294	0.926509	0.929401	2014-12-05	0.905928	0.877868	0.810388	0.810388	0.735998	0.773193	no	no	n/a	n/a	n/a	n/a	n/a	n/a	n/a	n/a	n/a
11090302_A12	Extract	2014-11-19	0.911164	0.947555	0.92936	2014-12-05	0.864392	1.05596	0.847904	0.847904	1.13309	0.990498	no	no	n/a	n/a	n/a	n/a	n/a	n/a	n/a	n/a	n/a
11010216_F07	Extract	2014-11-25	0.963382	0.895001	0.929191	2014-12-05	0.97493	0.939611	0.964318	0.964318	0.889796	0.927057	no	no	n/a	n/a	n/a	n/a	n/a	n/a	n/a	n/a	n/a
11010416_D03	Extract	2014-11-25	0.93367	0.924711	0.929191	2014-12-05	0.999266	0.960424	0.84073	0.84073	0.769182	0.804956	no	no	n/a	n/a	n/a	n/a	n/a	n/a	n/a	n/a	n/a
11040302_C06	Extract	2014-11-19	0.991951	0.866405	0.929178	2014-12-05	0.900503	1.1125	0.761555	0.761555	0.741948	0.751751	no	no	n/a	n/a	n/a	n/a	n/a	n/a	n/a	n/a	n/a
11020708_E12	Extract	2014-11-24	0.950706	0.907528	0.929117	2014-12-05	0.962236	1.00512	0.862306	0.862306	0.856023	0.859165	no	no	n/a	n/a	n/a	n/a	n/a	n/a	n/a	n/a	n/a
11001218_C12	Extract	2014-11-25	0.995432	0.862795	0.929113	2014-12-05	1.11174	1.09544	1.00674	1.00674	0.987786	0.997261	no	no	n/a	n/a	n/a	n/a	n/a	n/a	n/a	n/a	n/a
11100905_F05	Extract	2014-11-19	0.944916	0.91312	0.929018	2014-12-04	0.946668	1.05412	0.867012	0.867012	0.834671	0.850841	no	no	n/a	n/a	n/a	n/a	n/a	n/a	n/a	n/a	n/a
11100905_D04	Extract	2014-11-19	1.03237	0.825067	0.928721	2014-12-04	1.09633	0.953863	0.852481	0.852481	0.746886	0.799683	no	no	n/a	n/a	n/a	n/a	n/a	n/a	n/a	n/a	n/a
11010119_F08	Extract	2014-11-25	0.990849	0.866053	0.928451	2014-12-05	0.913009	1.00823	0.96904	0.96904	0.926325	0.947683	no	no	n/a	n/a	n/a	n/a	n/a	n/a	n/a	n/a	n/a
11010402_H07	Extract	2014-11-25	0.950824	0.906047	0.928435	2014-12-05	0.808462	0.784045	0.704899	0.704899	0.770649	0.737774	no	no	n/a	n/a	n/a	n/a	n/a	n/a	n/a	n/a	n/a
11040303_G04	Extract	2014-11-19	0.882485	0.973435	0.92796	2014-12-05	1.01392	1.09261	0.855305	0.855305	0.916535	0.88592	no	no	n/a	n/a	n/a	n/a	n/a	n/a	n/a	n/a	n/a
11040208_G05	Extract	2014-11-19	0.898563	0.957047	0.927805	2014-12-05	0.904377	1.05718	0.903987	0.903987	0.914723	0.909355	no	no	n/a	n/a	n/a	n/a	n/a	n/a	n/a	n/a	n/a
11010216_F03	Extract	2014-11-25	0.968768	0.886599	0.927684	2014-12-05	0.999559	1.0124	0.907927	0.907927	0.950258	0.929093	no	no	n/a	n/a	n/a	n/a	n/a	n/a	n/a	n/a	n/a
11010119_E09	Extract	2014-11-25	0.900889	0.954242	0.927566	2014-12-05	0.913709	0.998962	0.845424	0.845424	0.971937	0.908681	no	no	n/a	n/a	n/a	n/a	n/a	n/a	n/a	n/a	n/a
11010402_C11	Extract	2014-11-25	0.956083	0.898827	0.927455	2014-12-05	0.848114	0.919022	0.77093	0.77093	0.755351	0.76314	no	no	n/a	n/a	n/a	n/a	n/a	n/a	n/a	n/a	n/a
11020711_G07	Extract	2014-11-24	0.924768	0.929558	0.927163	2014-12-05	1.00731	1.06303	0.732188	0.732188	0.852705	0.792446	no	no	n/a	n/a	n/a	n/a	n/a	n/a	n/a	n/a	n/a
11090501_H10	Extract	2014-11-19	0.974546	0.879337	0.926942	2014-12-05	0.947089	0.846774	0.892383	0.892383	0.957835	0.925109	no	no	n/a	n/a	n/a	n/a	n/a	n/a	n/a	n/a	n/a
11090206_G02	Extract	2014-11-19	0.959501	0.893982	0.926741	2014-12-04	0.780501	0.882154	0.917408	0.917408	0.974815	0.946111	no	no	n/a	n/a	n/a	n/a	n/a	n/a	n/a	n/a	n/a
11100805_C07	Extract	2014-11-19	0.975957	0.877417	0.926687	2014-11-20	1.2287	1.09116	0.80489	0.80489	0.829612	0.817251	no	no	n/a	n/a	n/a	n/a	n/a	n/a	n/a	n/a	n/a
11090501_G04	Extract	2014-11-19	0.908278	0.94502	0.926649	2014-12-05	0.967273	0.97485	0.98277	0.98277	0.893083	0.937926	no	no	n/a	n/a	n/a	n/a	n/a	n/a	n/a	n/a	n/a
11090301_D03	Extract	2014-11-19	0.946854	0.905738	0.926296	2014-12-05	1.02338	0.984201	0.9349	0.9349	0.971519	0.953209	no	no	n/a	n/a	n/a	n/a	n/a	n/a	n/a	n/a	n/a
11010119_A06	Extract	2014-11-25	0.876664	0.975623	0.926143	2014-12-05	1.00987	1.01496	0.832035	0.832035	0.942495	0.887265	no	no	n/a	n/a	n/a	n/a	n/a	n/a	n/a	n/a	n/a
11020901_F07	Extract	2014-11-24	0.998464	0.853579	0.926022	2014-12-05	0.748638	0.90263	0.760433	0.760433	0.808344	0.784389	no	no	n/a	n/a	n/a	n/a	n/a	n/a	n/a	n/a	n/a
11040303_F11	Extract	2014-11-19	0.872079	0.979853	0.925966	2014-12-05	0.874908	0.882782	0.798929	0.798929	0.848627	0.823778	no	no	n/a	n/a	n/a	n/a	n/a	n/a	n/a	n/a	n/a
11100906_D03	Extract	2014-11-19	0.934554	0.916368	0.925461	2014-12-04	0.772693	0.915579	0.879438	0.879438	0.701041	0.790239	no	no	n/a	n/a	n/a	n/a	n/a	n/a	n/a	n/a	n/a
11090206_E07	Extract	2014-11-19	0.846388	1.00434	0.925365	2014-12-04	0.877305	0.88854	0.859481	0.859481	0.958233	0.908857	no	no	n/a	n/a	n/a	n/a	n/a	n/a	n/a	n/a	n/a
11010353_H02	Extract	2014-11-25	0.859549	0.990921	0.925235	2014-12-05	0.873525	0.829945	0.890935	0.890935	0.850905	0.87092	no	no	n/a	n/a	n/a	n/a	n/a	n/a	n/a	n/a	n/a
11090206_B12	Extract	2014-11-19	0.944259	0.906087	0.925173	2014-12-04	1.01228	0.939677	0.866656	0.866656	0.88881	0.877733	no	no	n/a	n/a	n/a	n/a	n/a	n/a	n/a	n/a	n/a
11090205_F07	Extract	2014-11-19	0.921059	0.928941	0.925	2014-12-04	1.00705	0.886479	0.862288	0.862288	0.962361	0.912325	no	no	n/a	n/a	n/a	n/a	n/a	n/a	n/a	n/a	n/a
11010402_F09	Extract	2014-11-25	0.97654	0.873272	0.924906	2014-12-05	0.834648	0.949112	0.764487	0.764487	0.751296	0.757892	no	no	n/a	n/a	n/a	n/a	n/a	n/a	n/a	n/a	n/a
11100206_A10	Extract	2014-11-19	0.985078	0.864129	0.924603	2014-11-21	0.829912	0.929335	0.691071	0.691071	0.945379	0.818225	no	no	n/a	n/a	n/a	n/a	n/a	n/a	n/a	n/a	n/a
11010216_G05	Extract	2014-11-25	0.991653	0.857113	0.924383	2014-12-05	0.937614	0.923846	0.946456	0.946456	0.933444	0.93995	no	no	n/a	n/a	n/a	n/a	n/a	n/a	n/a	n/a	n/a
11010416_A04	Extract	2014-11-25	1.02139	0.826956	0.924174	2014-12-05	1.00471	0.951361	0.776544	0.776544	0.714949	0.745746	no	no	n/a	n/a	n/a	n/a	n/a	n/a	n/a	n/a	n/a
11040302_D06	Extract	2014-11-19	0.866992	0.98056	0.923776	2014-12-05	0.963314	1.02344	0.709587	0.709587	0.74074	0.725164	no	no	n/a	n/a	n/a	n/a	n/a	n/a	n/a	n/a	n/a
11020709_B02	Extract	2014-11-24	0.968583	0.878342	0.923462	2014-12-05	0.8435	1.07728	0.864221	0.864221	1.01149	0.937855	no	no	n/a	n/a	n/a	n/a	n/a	n/a	n/a	n/a	n/a
11010416_H04	Extract	2014-11-25	0.850683	0.996044	0.923364	2014-12-05	0.780213	0.795357	0.738449	0.738449	0.761102	0.749775	no	no	n/a	n/a	n/a	n/a	n/a	n/a	n/a	n/a	n/a
11010119_B11	Extract	2014-11-25	0.906275	0.940186	0.923231	2014-12-05	0.996737	0.955838	0.897315	0.897315	0.827401	0.862358	no	no	n/a	n/a	n/a	n/a	n/a	n/a	n/a	n/a	n/a
11010416_A05	Extract	2014-11-25	0.988738	0.856735	0.922736	2014-12-05	1.01978	1.04255	0.893902	0.893902	0.939846	0.916874	no	no	n/a	n/a	n/a	n/a	n/a	n/a	n/a	n/a	n/a
11100906_F02	Extract	2014-11-19	0.928454	0.915938	0.922196	2014-12-04	0.847186	0.931116	0.880254	0.880254	0.861391	0.870822	no	no	n/a	n/a	n/a	n/a	n/a	n/a	n/a	n/a	n/a
11090206_B09	Extract	2014-11-19	0.926132	0.918169	0.922151	2014-12-04	0.946515	0.996208	0.958739	0.958739	0.919531	0.939135	no	no	n/a	n/a	n/a	n/a	n/a	n/a	n/a	n/a	n/a
11010416_B08	Extract	2014-11-25	0.960488	0.883788	0.922138	2014-12-05	0.988121	0.924217	0.803945	0.803945	0.763718	0.783832	no	no	n/a	n/a	n/a	n/a	n/a	n/a	n/a	n/a	n/a
11040208_F07	Extract	2014-11-19	0.9223	0.921953	0.922127	2014-12-05	0.949147	1.03849	0.697786	0.697786	0.794064	0.745925	no	no	n/a	n/a	n/a	n/a	n/a	n/a	n/a	n/a	n/a
11010216_D10	Extract	2014-11-25	0.924873	0.919344	0.922108	2014-12-05	0.921918	0.905752	0.957595	0.957595	0.953834	0.955715	no	no	n/a	n/a	n/a	n/a	n/a	n/a	n/a	n/a	n/a
11020901_E07	Extract	2014-11-24	1.01329	0.830923	0.922105	2014-12-05	0.695347	0.891308	0.83737	0.83737	0.862685	0.850027	no	no	n/a	n/a	n/a	n/a	n/a	n/a	n/a	n/a	n/a
11010341_A11	Extract	2014-11-25	0.940202	0.903375	0.921788	2014-12-05	1.04788	1.02609	0.978263	0.978263	1.01529	0.996779	no	no	n/a	n/a	n/a	n/a	n/a	n/a	n/a	n/a	n/a
11090302_G02	Extract	2014-11-19	1.05304	0.790497	0.921769	2014-12-05	0.924731	0.995246	0.922232	0.922232	0.960462	0.941347	no	no	n/a	n/a	n/a	n/a	n/a	n/a	n/a	n/a	n/a
11010416_B10	Extract	2014-11-25	0.942233	0.900954	0.921594	2014-12-05	0.977234	0.900694	0.78058	0.78058	0.793164	0.786872	no	no	n/a	n/a	n/a	n/a	n/a	n/a	n/a	n/a	n/a
11020711_C08	Extract	2014-11-24	0.907758	0.934377	0.921067	2014-12-05	0.980848	1.02513	0.725995	0.725995	0.965291	0.845643	no	no	n/a	n/a	n/a	n/a	n/a	n/a	n/a	n/a	n/a
11020711_A02	Extract	2014-11-24	0.897508	0.944474	0.920991	2014-12-05	0.906032	1.01146	1.14788	1.14788	0.991734	1.06981	no	no	n/a	n/a	n/a	n/a	n/a	n/a	n/a	n/a	n/a
11040208_B02	Extract	2014-11-19	0.920137	0.921423	0.92078	2014-12-05	1.04954	1.1023	0.810757	0.810757	0.97629	0.893524	no	no	n/a	n/a	n/a	n/a	n/a	n/a	n/a	n/a	n/a
11090205_G03	Extract	2014-11-19	1.0209	0.819957	0.920429	2014-12-04	0.883027	0.747213	1.00041	1.00041	0.919187	0.9598	no	no	n/a	n/a	n/a	n/a	n/a	n/a	n/a	n/a	n/a
11010119_F12	Extract	2014-11-25	0.927017	0.912315	0.919666	2014-12-05	0.894934	0.921057	0.923566	0.923566	0.985853	0.95471	no	no	n/a	n/a	n/a	n/a	n/a	n/a	n/a	n/a	n/a
11040208_H02	Extract	2014-11-19	0.935435	0.903797	0.919616	2014-12-05	0.952744	0.933212	0.858317	0.858317	0.89712	0.877718	no	no	n/a	n/a	n/a	n/a	n/a	n/a	n/a	n/a	n/a
11020711_B03	Extract	2014-11-24	0.977749	0.86134	0.919544	2014-12-05	0.77312	1.10498	0.869917	0.869917	0.966848	0.918383	no	no	n/a	n/a	n/a	n/a	n/a	n/a	n/a	n/a	n/a
11100807_E12	Extract	2014-11-19	0.929464	0.909226	0.919345	2014-12-04	0.891147	0.913788	0.877068	0.877068	0.962279	0.919673	no	no	n/a	n/a	n/a	n/a	n/a	n/a	n/a	n/a	n/a
11001218_G12	Extract	2014-11-25	0.906543	0.930707	0.918625	2014-12-05	1.05164	1.18457	1.04918	1.04918	1.10462	1.0769	no	no	n/a	n/a	n/a	n/a	n/a	n/a	n/a	n/a	n/a
11100304_G02	Extract	2014-11-19	0.985878	0.851012	0.918445	2014-12-04	0.950867	1.02509	1.04595	1.04595	0.958957	1.00246	no	no	n/a	n/a	n/a	n/a	n/a	n/a	n/a	n/a	n/a
11001218_D07	Extract	2014-11-25	0.951242	0.885253	0.918248	2014-12-05	1.08546	0.959779	0.982735	0.982735	1.08001	1.03137	no	no	n/a	n/a	n/a	n/a	n/a	n/a	n/a	n/a	n/a
11090201_C03	Extract	2014-11-19	0.973036	0.862782	0.917909	2014-12-04	0.99883	1.00437	0.987251	0.987251	0.939243	0.963247	no	no	n/a	n/a	n/a	n/a	n/a	n/a	n/a	n/a	n/a
11010402_F02	Extract	2014-11-25	0.959387	0.876268	0.917827	2014-12-05	0.899685	0.841909	0.724762	0.724762	0.713195	0.718978	no	no	n/a	n/a	n/a	n/a	n/a	n/a	n/a	n/a	n/a
11020708_F06	Extract	2014-11-24	0.973372	0.861778	0.917575	2014-12-05	1.14283	1.22456	1.04036	1.04036	1.10264	1.0715	no	no	n/a	n/a	n/a	n/a	n/a	n/a	n/a	n/a	n/a
11100102_F11	Extract	2014-11-19	1.04387	0.791105	0.91749	2014-11-21	0.715991	1.25171	0.719139	0.719139	0.902716	0.810928	no	no	n/a	n/a	n/a	n/a	n/a	n/a	n/a	n/a	n/a
11010535_H03	Extract	2014-11-25	0.886643	0.948169	0.917406	2014-12-05	0.835679	0.920597	0.692548	0.692548	0.73804	0.715294	no	no	n/a	n/a	n/a	n/a	n/a	n/a	n/a	n/a	n/a
11040208_C06	Extract	2014-11-19	0.904254	0.93051	0.917382	2014-12-05	0.965556	1.13848	0.779954	0.779954	0.742552	0.761253	no	no	n/a	n/a	n/a	n/a	n/a	n/a	n/a	n/a	n/a
11040303_H06	Extract	2014-11-19	0.864634	0.970041	0.917338	2014-12-05	1.03368	0.930053	0.719499	0.719499	0.925322	0.82241	no	no	n/a	n/a	n/a	n/a	n/a	n/a	n/a	n/a	n/a
11010402_G09	Extract	2014-11-25	1.0092	0.825458	0.917326	2014-12-05	0.95675	0.864083	0.839099	0.839099	0.711182	0.775141	no	no	n/a	n/a	n/a	n/a	n/a	n/a	n/a	n/a	n/a
11020901_B07	Extract	2014-11-24	1.01612	0.818344	0.917234	2014-12-05	0.806103	0.957428	0.785842	0.785842	0.820392	0.803117	no	no	n/a	n/a	n/a	n/a	n/a	n/a	n/a	n/a	n/a
11020708_G07	Extract	2014-11-24	0.960738	0.873523	0.917131	2014-12-05	1.07932	1.1716	0.985902	0.985902	1.06591	1.0259	no	no	n/a	n/a	n/a	n/a	n/a	n/a	n/a	n/a	n/a
11090204_A09	Extract	2014-11-19	0.954909	0.879278	0.917093	2014-12-04	1.0073	0.94965	0.982571	0.982571	1.09089	1.03673	no	no	n/a	n/a	n/a	n/a	n/a	n/a	n/a	n/a	n/a
11010353_A02	Extract	2014-11-25	0.905723	0.928336	0.91703	2014-12-05	1.06128	0.961549	1.15837	1.15837	0.905483	1.03193	no	no	n/a	n/a	n/a	n/a	n/a	n/a	n/a	n/a	n/a
11010216_G03	Extract	2014-11-25	0.993824	0.840068	0.916946	2014-12-05	0.961543	0.932881	0.845424	0.845424	0.845182	0.845303	no	no	n/a	n/a	n/a	n/a	n/a	n/a	n/a	n/a	n/a
11010119_C11	Extract	2014-11-25	1.00162	0.831155	0.916388	2014-12-05	0.878771	1.04557	0.886454	0.886454	0.852269	0.869361	no	no	n/a	n/a	n/a	n/a	n/a	n/a	n/a	n/a	n/a
11090204_B03	Extract	2014-11-19	0.984888	0.847859	0.916373	2014-12-04	0.995585	0.934309	0.959706	0.959706	0.918843	0.939274	no	no	n/a	n/a	n/a	n/a	n/a	n/a	n/a	n/a	n/a
11090302_C08	Extract	2014-11-19	0.86664	0.965917	0.916279	2014-12-05	0.910952	1.06316	0.807096	0.807096	0.886241	0.846669	no	no	n/a	n/a	n/a	n/a	n/a	n/a	n/a	n/a	n/a
11001218_E02	Extract	2014-11-25	1.01373	0.818176	0.915955	2014-12-05	0.996504	1.06251	1.01065	1.01065	0.950581	0.980617	no	no	n/a	n/a	n/a	n/a	n/a	n/a	n/a	n/a	n/a
11100807_H12	Extract	2014-11-19	0.887593	0.943432	0.915512	2014-12-04	0.942815	0.798311	0.793513	0.793513	0.92642	0.859966	no	no	n/a	n/a	n/a	n/a	n/a	n/a	n/a	n/a	n/a
11010216_A04	Extract	2014-11-25	0.927017	0.903645	0.915331	2014-12-05	1.11314	0.806827	0.86273	0.86273	0.842251	0.852491	no	no	n/a	n/a	n/a	n/a	n/a	n/a	n/a	n/a	n/a
11090201_H03	Extract	2014-11-19	0.969165	0.861252	0.915209	2014-12-04	0.923626	0.878312	0.927421	0.927421	0.93164	0.92953	no	no	n/a	n/a	n/a	n/a	n/a	n/a	n/a	n/a	n/a
11090205_B07	Extract	2014-11-19	1.05985	0.770316	0.915082	2014-12-04	0.992861	0.985955	1.09194	1.09194	0.968244	1.03009	no	no	n/a	n/a	n/a	n/a	n/a	n/a	n/a	n/a	n/a
11100206_G12	Extract	2014-11-19	0.987955	0.841803	0.914879	2014-11-21	0.887269	0.851974	0.854413	0.854413	0.86929	0.861852	no	no	n/a	n/a	n/a	n/a	n/a	n/a	n/a	n/a	n/a
11010402_A09	Extract	2014-11-25	0.8457	0.983101	0.914401	2014-12-05	0.886734	0.815912	0.79106	0.79106	1.02421	0.907637	no	no	n/a	n/a	n/a	n/a	n/a	n/a	n/a	n/a	n/a
11040209_H06	Extract	2014-11-19	0.876795	0.951708	0.914251	2014-12-05	1.00615	0.950914	0.82724	0.82724	0.847087	0.837163	no	no	n/a	n/a	n/a	n/a	n/a	n/a	n/a	n/a	n/a
11020901_F11	Extract	2014-11-24	0.958117	0.870373	0.914245	2014-12-05	0.65408	0.821942	0.700846	0.700846	0.769369	0.735107	no	no	n/a	n/a	n/a	n/a	n/a	n/a	n/a	n/a	n/a
11010353_B12	Extract	2014-11-25	0.879456	0.948499	0.913978	2014-12-05	0.904612	0.789937	0.95325	0.95325	0.786809	0.870029	no	no	n/a	n/a	n/a	n/a	n/a	n/a	n/a	n/a	n/a
11010535_C12	Extract	2014-11-25	0.902419	0.925311	0.913865	2014-12-05	0.819865	0.822254	0.890935	0.890935	0.718687	0.804811	no	no	n/a	n/a	n/a	n/a	n/a	n/a	n/a	n/a	n/a
11090204_E12	Extract	2014-11-19	0.954668	0.872898	0.913783	2014-12-04	0.87458	1.02819	0.948726	0.948726	0.910552	0.929639	no	no	n/a	n/a	n/a	n/a	n/a	n/a	n/a	n/a	n/a
11040209_C08	Extract	2014-11-19	0.836591	0.98947	0.91303	2014-12-05	0.504513	0.976383	0.79975	0.79975	0.8383	0.819025	no	no	n/a	n/a	n/a	n/a	n/a	n/a	n/a	n/a	n/a
11010535_G08	Extract	2014-11-25	0.941958	0.883788	0.912873	2014-12-05	0.811326	0.89505	0.82461	0.82461	0.742641	0.783625	no	no	n/a	n/a	n/a	n/a	n/a	n/a	n/a	n/a	n/a
11020901_C05	Extract	2014-11-24	0.921063	0.904586	0.912824	2014-12-05	1.05197	1.00088	0.873723	0.873723	1.02203	0.947877	no	no	n/a	n/a	n/a	n/a	n/a	n/a	n/a	n/a	n/a
11090205_F03	Extract	2014-11-19	0.880213	0.945415	0.912814	2014-12-04	0.819812	0.933546	0.972527	0.972527	0.864315	0.918421	no	no	n/a	n/a	n/a	n/a	n/a	n/a	n/a	n/a	n/a
11100906_H11	Extract	2014-11-19	1.03114	0.794368	0.912755	2014-12-04	0.88592	0.827348	0.897181	0.897181	0.997229	0.947205	no	no	n/a	n/a	n/a	n/a	n/a	n/a	n/a	n/a	n/a
11010402_H08	Extract	2014-11-25	0.901291	0.924112	0.912701	2014-12-05	1.02625	0.910207	0.78435	0.78435	0.730535	0.757442	no	no	n/a	n/a	n/a	n/a	n/a	n/a	n/a	n/a	n/a
11100206_D02	Extract	2014-11-19	1.0021	0.823097	0.912598	2014-11-21	0.815442	0.993977	0.771828	0.771828	0.92782	0.849824	no	no	n/a	n/a	n/a	n/a	n/a	n/a	n/a	n/a	n/a
11020709_C10	Extract	2014-11-24	0.967499	0.857564	0.912532	2014-12-05	0.988284	1.14964	0.887503	0.887503	0.91552	0.901511	no	no	n/a	n/a	n/a	n/a	n/a	n/a	n/a	n/a	n/a
11100807_F03	Extract	2014-11-19	0.923788	0.901223	0.912506	2014-12-04	0.917871	1.02978	0.992687	0.992687	0.591468	0.792078	no	no	n/a	n/a	n/a	n/a	n/a	n/a	n/a	n/a	n/a
11010119_G11	Extract	2014-11-25	0.91812	0.90553	0.911825	2014-12-05	0.893301	1.085	0.914344	0.914344	0.915018	0.914681	no	no	n/a	n/a	n/a	n/a	n/a	n/a	n/a	n/a	n/a
11010402_C05	Extract	2014-11-25	0.95165	0.871774	0.911712	2014-12-05	0.896589	0.893925	0.821108	0.821108	0.713799	0.767453	no	no	n/a	n/a	n/a	n/a	n/a	n/a	n/a	n/a	n/a
11100804_F10	Extract	2014-11-19	0.91049	0.912035	0.911262	2014-11-20	0.956095	0.714266	0.884453	0.884453	0.893529	0.888991	no	no	n/a	n/a	n/a	n/a	n/a	n/a	n/a	n/a	n/a
11100804_H08	Extract	2014-11-19	0.953105	0.868758	0.910932	2014-11-20	0.938378	1.05959	0.748837	0.748837	0.970395	0.859616	no	no	n/a	n/a	n/a	n/a	n/a	n/a	n/a	n/a	n/a
11020709_G07	Extract	2014-11-24	0.917791	0.90396	0.910875	2014-12-05	0.973607	1.11384	0.881097	0.881097	0.970702	0.9259	no	no	n/a	n/a	n/a	n/a	n/a	n/a	n/a	n/a	n/a
11090205_C03	Extract	2014-11-19	0.8348	0.986754	0.910777	2014-12-04	0.904454	0.885461	0.937465	0.937465	0.926445	0.931955	no	no	n/a	n/a	n/a	n/a	n/a	n/a	n/a	n/a	n/a
11100903_C08	Extract	2014-11-19	0.948794	0.872439	0.910616	2014-12-04	0.789209	0.949586	0.864116	0.864116	0.911229	0.887673	no	no	n/a	n/a	n/a	n/a	n/a	n/a	n/a	n/a	n/a
11020709_E11	Extract	2014-11-24	0.910596	0.909614	0.910105	2014-12-05	0.846979	1.15407	0.845217	0.845217	0.892701	0.868959	no	no	n/a	n/a	n/a	n/a	n/a	n/a	n/a	n/a	n/a
11010535_A12	Extract	2014-11-25	0.968528	0.851013	0.90977	2014-12-05	0.89063	0.727576	0.862197	0.862197	0.752446	0.807321	no	no	n/a	n/a	n/a	n/a	n/a	n/a	n/a	n/a	n/a
11020708_C12	Extract	2014-11-24	0.993004	0.826522	0.909763	2014-12-05	1.01542	1.1716	0.839024	0.839024	0.917842	0.878433	no	no	n/a	n/a	n/a	n/a	n/a	n/a	n/a	n/a	n/a
11010535_C02	Extract	2014-11-25	0.952751	0.866351	0.909551	2014-12-05	1.01405	0.993235	0.800176	0.800176	0.811338	0.805757	no	no	n/a	n/a	n/a	n/a	n/a	n/a	n/a	n/a	n/a
11040208_C02	Extract	2014-11-19	0.883265	0.935673	0.909469	2014-12-05	0.920232	0.946067	0.960363	0.960363	0.915629	0.937996	no	no	n/a	n/a	n/a	n/a	n/a	n/a	n/a	n/a	n/a
11090301_F06	Extract	2014-11-19	1.03907	0.779717	0.909396	2014-12-05	0.842766	0.965261	0.9518	0.9518	0.841332	0.896566	no	no	n/a	n/a	n/a	n/a	n/a	n/a	n/a	n/a	n/a
11001218_H12	Extract	2014-11-25	0.955021	0.863603	0.909312	2014-12-05	0.896123	0.921057	0.826173	0.826173	0.863608	0.844891	no	no	n/a	n/a	n/a	n/a	n/a	n/a	n/a	n/a	n/a
11090201_A10	Extract	2014-11-19	0.916708	0.901455	0.909081	2014-12-04	0.957736	0.955272	0.992273	0.992273	1.06601	1.02914	no	no	n/a	n/a	n/a	n/a	n/a	n/a	n/a	n/a	n/a
11001218_G11	Extract	2014-11-25	0.931331	0.886599	0.908965	2014-12-05	0.964365	1.04349	0.909316	0.909316	1.02306	0.966187	no	no	n/a	n/a	n/a	n/a	n/a	n/a	n/a	n/a	n/a
11090205_D05	Extract	2014-11-19	0.940628	0.877071	0.90885	2014-12-04	0.791697	0.774791	0.882315	0.882315	0.822861	0.852588	no	no	n/a	n/a	n/a	n/a	n/a	n/a	n/a	n/a	n/a
11090301_B12	Extract	2014-11-19	1.00559	0.811851	0.908719	2014-12-05	0.934492	0.902904	0.990954	0.990954	0.878426	0.93469	no	no	n/a	n/a	n/a	n/a	n/a	n/a	n/a	n/a	n/a
11010402_B09	Extract	2014-11-25	0.884715	0.932231	0.908473	2014-12-05	1.01456	0.85005	0.97501	0.97501	0.762281	0.868646	no	no	n/a	n/a	n/a	n/a	n/a	n/a	n/a	n/a	n/a
11090201_H09	Extract	2014-11-19	0.924208	0.892671	0.90844	2014-12-04	0.931082	1.03765	0.919279	0.919279	0.951318	0.935299	no	no	n/a	n/a	n/a	n/a	n/a	n/a	n/a	n/a	n/a
11090205_H06	Extract	2014-11-19	0.892306	0.92409	0.908198	2014-12-04	0.918895	0.884953	0.944671	0.944671	0.968244	0.956457	no	no	n/a	n/a	n/a	n/a	n/a	n/a	n/a	n/a	n/a
11010216_A05	Extract	2014-11-25	0.901452	0.914739	0.908095	2014-12-05	1.00448	0.814248	0.871925	0.871925	0.84354	0.857732	no	no	n/a	n/a	n/a	n/a	n/a	n/a	n/a	n/a	n/a
11020901_G07	Extract	2014-11-24	0.94219	0.872897	0.907544	2014-12-05	0.909315	0.965504	0.594789	0.594789	0.851659	0.723224	no	no	n/a	n/a	n/a	n/a	n/a	n/a	n/a	n/a	n/a
11010416_B09	Extract	2014-11-25	0.889121	0.92561	0.907365	2014-12-05	1.01978	0.955207	0.947342	0.947342	0.776687	0.862014	no	no	n/a	n/a	n/a	n/a	n/a	n/a	n/a	n/a	n/a
11010402_F08	Extract	2014-11-25	0.924529	0.890109	0.907319	2014-12-05	0.949991	0.882164	0.871874	0.871874	0.62089	0.746382	no	no	n/a	n/a	n/a	n/a	n/a	n/a	n/a	n/a	n/a
11040208_G11	Extract	2014-11-19	0.886987	0.927116	0.907051	2014-12-05	0.857143	0.983425	0.76098	0.76098	0.877402	0.819191	no	no	n/a	n/a	n/a	n/a	n/a	n/a	n/a	n/a	n/a
11020708_H05	Extract	2014-11-24	0.844116	0.969028	0.906572	2014-12-05	1.00863	1.32016	0.893672	0.893672	1.04179	0.967729	no	no	n/a	n/a	n/a	n/a	n/a	n/a	n/a	n/a	n/a
11010416_B11	Extract	2014-11-25	0.899088	0.913866	0.906477	2014-12-05	0.903322	0.958378	0.856823	0.856823	0.767457	0.81214	no	no	n/a	n/a	n/a	n/a	n/a	n/a	n/a	n/a	n/a
11100804_F04	Extract	2014-11-19	0.934908	0.878017	0.906463	2014-11-20	1.00282	1.00326	0.835524	0.835524	0.897845	0.866685	no	no	n/a	n/a	n/a	n/a	n/a	n/a	n/a	n/a	n/a
11100807_E02	Extract	2014-11-19	0.914638	0.89819	0.906414	2014-12-04	1.10291	1.1267	0.945855	0.945855	0.853795	0.899825	no	no	n/a	n/a	n/a	n/a	n/a	n/a	n/a	n/a	n/a
11010416_D05	Extract	2014-11-25	0.954128	0.858532	0.90633	2014-12-05	0.850694	0.991863	0.656084	0.656084	0.680902	0.668493	no	no	n/a	n/a	n/a	n/a	n/a	n/a	n/a	n/a	n/a
11090205_A02	Extract	2014-11-19	0.927334	0.884543	0.905939	2014-12-04	1.02947	0.904899	0.973494	0.973494	0.916778	0.945136	no	no	n/a	n/a	n/a	n/a	n/a	n/a	n/a	n/a	n/a
11090201_A03	Extract	2014-11-19	0.97907	0.831603	0.905336	2014-12-04	0.873812	0.962167	0.882627	0.882627	0.886401	0.884514	no	no	n/a	n/a	n/a	n/a	n/a	n/a	n/a	n/a	n/a
11090205_C10	Extract	2014-11-19	0.896177	0.914433	0.905305	2014-12-04	0.839728	0.94965	0.943704	0.943704	0.934048	0.938876	no	no	n/a	n/a	n/a	n/a	n/a	n/a	n/a	n/a	n/a
11040303_G02	Extract	2014-11-19	0.821097	0.988763	0.90493	2014-12-05	1.02117	0.997486	0.833291	0.833291	0.810128	0.82171	no	no	n/a	n/a	n/a	n/a	n/a	n/a	n/a	n/a	n/a
11020709_C11	Extract	2014-11-24	0.964877	0.844567	0.904722	2014-12-05	1.03205	1.2107	0.925274	0.925274	0.996865	0.961069	no	no	n/a	n/a	n/a	n/a	n/a	n/a	n/a	n/a	n/a
11020711_D11	Extract	2014-11-24	0.940673	0.868704	0.904688	2014-12-05	0.766336	0.946086	0.731928	0.731928	0.762452	0.74719	no	no	n/a	n/a	n/a	n/a	n/a	n/a	n/a	n/a	n/a
11090206_B02	Extract	2014-11-19	0.991403	0.81775	0.904577	2014-12-04	0.81632	0.887777	0.875452	0.875452	0.911274	0.893363	no	no	n/a	n/a	n/a	n/a	n/a	n/a	n/a	n/a	n/a
11040209_D10	Extract	2014-11-19	0.895426	0.913591	0.904508	2014-12-05	0.827951	0.84593	0.735708	0.735708	0.714984	0.725346	no	no	n/a	n/a	n/a	n/a	n/a	n/a	n/a	n/a	n/a
11040209_H09	Extract	2014-11-19	0.846393	0.962032	0.904213	2014-12-05	0.967216	0.941701	0.822585	0.822585	0.955637	0.889111	no	no	n/a	n/a	n/a	n/a	n/a	n/a	n/a	n/a	n/a
11010402_G06	Extract	2014-11-25	0.887744	0.920188	0.903966	2014-12-05	0.856937	0.856616	0.75751	0.75751	0.771511	0.76451	no	no	n/a	n/a	n/a	n/a	n/a	n/a	n/a	n/a	n/a
11020708_B03	Extract	2014-11-24	0.895992	0.91193	0.903961	2014-12-05	0.424979	0.900912	0.585287	0.585287	0.563161	0.574224	no	no	n/a	n/a	n/a	n/a	n/a	n/a	n/a	n/a	n/a
11090204_G04	Extract	2014-11-19	0.892787	0.915089	0.903938	2014-12-04	0.887015	0.843788	0.901437	0.901437	0.848422	0.874929	no	no	n/a	n/a	n/a	n/a	n/a	n/a	n/a	n/a	n/a
11100303_A07	Extract	2014-11-19	1.07172	0.736033	0.903875	2014-12-04	1.10978	1.06639	1.01394	1.01394	1.11856	1.06625	no	no	n/a	n/a	n/a	n/a	n/a	n/a	n/a	n/a	n/a
11090301_F10	Extract	2014-11-19	0.970559	0.836858	0.903709	2014-12-05	0.94612	0.923753	0.906481	0.906481	0.948724	0.927602	no	no	n/a	n/a	n/a	n/a	n/a	n/a	n/a	n/a	n/a
11090205_H04	Extract	2014-11-19	0.910914	0.896407	0.903661	2014-12-04	0.954738	0.87676	0.928981	0.928981	1.05666	0.992819	no	no	n/a	n/a	n/a	n/a	n/a	n/a	n/a	n/a	n/a
11010119_H05	Extract	2014-11-25	0.924069	0.883099	0.903584	2014-12-05	1.0202	1.01427	0.898454	0.898454	1.03472	0.966586	no	no	n/a	n/a	n/a	n/a	n/a	n/a	n/a	n/a	n/a
11010535_B03	Extract	2014-11-25	1.04463	0.762304	0.903468	2014-12-05	1.12875	0.92876	0.821937	0.821937	0.699651	0.760794	no	no	n/a	n/a	n/a	n/a	n/a	n/a	n/a	n/a	n/a
11010535_G10	Extract	2014-11-25	0.912084	0.894633	0.903358	2014-12-05	0.861323	0.824053	0.92935	0.92935	0.812488	0.870919	no	no	n/a	n/a	n/a	n/a	n/a	n/a	n/a	n/a	n/a
11090201_F08	Extract	2014-11-19	1.0047	0.801735	0.903216	2014-12-04	0.942799	0.855822	0.888273	0.888273	0.907799	0.898036	no	no	n/a	n/a	n/a	n/a	n/a	n/a	n/a	n/a	n/a
11090304_C09	Extract	2014-11-19	0.908719	0.897471	0.903095	2014-12-05	0.875311	1.12511	0.856368	0.856368	0.892402	0.874385	no	no	n/a	n/a	n/a	n/a	n/a	n/a	n/a	n/a	n/a
11040303_H05	Extract	2014-11-19	0.88954	0.916614	0.903077	2014-12-05	0.820729	1.02151	0.780502	0.780502	0.888333	0.834417	no	no	n/a	n/a	n/a	n/a	n/a	n/a	n/a	n/a	n/a
11040209_E10	Extract	2014-11-19	0.832284	0.973789	0.903036	2014-12-05	0.824631	0.985596	0.903713	0.903713	0.781322	0.842518	no	no	n/a	n/a	n/a	n/a	n/a	n/a	n/a	n/a	n/a
11010416_A12	Extract	2014-11-25	0.938103	0.86755	0.902827	2014-12-05	1.1516	0.931009	0.854417	0.854417	0.775824	0.815121	no	no	n/a	n/a	n/a	n/a	n/a	n/a	n/a	n/a	n/a
11010535_D11	Extract	2014-11-25	0.920674	0.884387	0.902531	2014-12-05	0.889598	0.879442	0.930687	0.930687	0.838195	0.884441	no	no	n/a	n/a	n/a	n/a	n/a	n/a	n/a	n/a	n/a
11100807_C11	Extract	2014-11-19	0.951844	0.853184	0.902514	2014-12-04	1.01377	0.911527	0.908553	0.908553	1.01	0.959276	no	no	n/a	n/a	n/a	n/a	n/a	n/a	n/a	n/a	n/a
11020708_F12	Extract	2014-11-24	0.940673	0.864073	0.902373	2014-12-05	0.965302	1.08535	0.90627	0.90627	0.940661	0.923465	no	no	n/a	n/a	n/a	n/a	n/a	n/a	n/a	n/a	n/a
11090206_B06	Extract	2014-11-19	0.960462	0.844122	0.902292	2014-12-04	0.939554	0.925099	0.951877	0.951877	0.935768	0.943823	no	no	n/a	n/a	n/a	n/a	n/a	n/a	n/a	n/a	n/a
11100807_C09	Extract	2014-11-19	0.861375	0.942334	0.901855	2014-12-04	1.11062	0.999131	0.842951	0.842951	0.871709	0.85733	no	no	n/a	n/a	n/a	n/a	n/a	n/a	n/a	n/a	n/a
11040302_D05	Extract	2014-11-19	0.816011	0.987685	0.901848	2014-12-05	0.867962	1.01155	0.802789	0.802789	0.7392	0.770995	no	no	n/a	n/a	n/a	n/a	n/a	n/a	n/a	n/a	n/a
11010119_A07	Extract	2014-11-25	0.932939	0.870362	0.901651	2014-12-05	0.965765	0.842276	0.886731	0.886731	0.962886	0.924808	no	no	n/a	n/a	n/a	n/a	n/a	n/a	n/a	n/a	n/a
11100804_C08	Extract	2014-11-19	0.971302	0.831941	0.901622	2014-11-20	1.06951	1.1484	0.908789	0.908789	0.90706	0.907924	no	no	n/a	n/a	n/a	n/a	n/a	n/a	n/a	n/a	n/a
11010216_D08	Extract	2014-11-25	0.931063	0.872004	0.901534	2014-12-05	0.993215	0.955123	0.801367	0.801367	0.895272	0.848319	no	no	n/a	n/a	n/a	n/a	n/a	n/a	n/a	n/a	n/a
11010216_G02	Extract	2014-11-25	0.807231	0.995657	0.901444	2014-12-05	1.00824	0.988521	0.930817	0.930817	0.886221	0.908519	no	no	n/a	n/a	n/a	n/a	n/a	n/a	n/a	n/a	n/a
11090304_E06	Extract	2014-11-19	0.972564	0.830213	0.901388	2014-12-05	0.950162	1.04804	0.787982	0.787982	0.881669	0.834825	no	no	n/a	n/a	n/a	n/a	n/a	n/a	n/a	n/a	n/a
11001218_G08	Extract	2014-11-25	0.892287	0.910403	0.901345	2014-12-05	0.949346	0.983658	0.926622	0.926622	1.05186	0.989239	no	no	n/a	n/a	n/a	n/a	n/a	n/a	n/a	n/a	n/a
11010535_F07	Extract	2014-11-25	0.936699	0.865752	0.901226	2014-12-05	0.907218	0.984172	0.816563	0.816563	0.703102	0.759832	no	no	n/a	n/a	n/a	n/a	n/a	n/a	n/a	n/a	n/a
11090204_F02	Extract	2014-11-19	0.897138	0.905191	0.901165	2014-12-04	0.958231	0.846358	1.05903	1.05903	0.969964	1.0145	no	no	n/a	n/a	n/a	n/a	n/a	n/a	n/a	n/a	n/a
11100304_C06	Extract	2014-11-19	0.978401	0.823803	0.901102	2014-12-04	0.873332	0.789811	0.804834	0.804834	0.822912	0.813873	no	no	n/a	n/a	n/a	n/a	n/a	n/a	n/a	n/a	n/a
11090301_A04	Extract	2014-11-19	0.917597	0.884156	0.900877	2014-12-05	0.929741	0.984679	0.822035	0.822035	0.949697	0.885866	no	no	n/a	n/a	n/a	n/a	n/a	n/a	n/a	n/a	n/a
11010216_H10	Extract	2014-11-25	0.896333	0.904991	0.900662	2014-12-05	0.889546	0.776725	0.795228	0.795228	0.863286	0.829257	no	no	n/a	n/a	n/a	n/a	n/a	n/a	n/a	n/a	n/a
11100304_F03	Extract	2014-11-19	1.03715	0.764129	0.90064	2014-12-04	0.952864	1.05486	0.894187	0.894187	0.85417	0.874179	no	no	n/a	n/a	n/a	n/a	n/a	n/a	n/a	n/a	n/a
11100206_F12	Extract	2014-11-19	0.928499	0.872749	0.900624	2014-11-21	0.894492	0.987814	0.848382	0.848382	0.915837	0.882109	no	no	n/a	n/a	n/a	n/a	n/a	n/a	n/a	n/a	n/a
11090204_H05	Extract	2014-11-19	0.903894	0.896189	0.900041	2014-12-04	0.830761	0.915889	0.978173	0.978173	0.9368	0.957487	no	no	n/a	n/a	n/a	n/a	n/a	n/a	n/a	n/a	n/a
11100205_D09	Extract	2014-11-19	1.05582	0.744215	0.900019	2014-11-21	0.969099	0.914168	0.794883	0.794883	1.00502	0.899951	no	no	n/a	n/a	n/a	n/a	n/a	n/a	n/a	n/a	n/a
11010416_D07	Extract	2014-11-25	0.94529	0.854608	0.899949	2014-12-05	0.943774	0.826774	0.882621	0.882621	0.711182	0.796901	no	no	n/a	n/a	n/a	n/a	n/a	n/a	n/a	n/a	n/a
11040303_E09	Extract	2014-11-19	0.822481	0.97736	0.899921	2014-12-05	0.929944	1.02635	0.630485	0.630485	0.851344	0.740915	no	no	n/a	n/a	n/a	n/a	n/a	n/a	n/a	n/a	n/a
11100701_F10	Extract	2014-11-19	1.04045	0.758647	0.899549	2014-12-04	0.825927	0.911601	0.87708	0.87708	0.912292	0.894686	no	no	n/a	n/a	n/a	n/a	n/a	n/a	n/a	n/a	n/a
11010402_C08	Extract	2014-11-25	0.927861	0.870875	0.899368	2014-12-05	0.799149	0.83966	0.798037	0.798037	0.72878	0.763409	no	no	n/a	n/a	n/a	n/a	n/a	n/a	n/a	n/a	n/a
11090304_C06	Extract	2014-11-19	1.01667	0.782001	0.899335	2014-12-05	0.918326	1.0586	0.782909	0.782909	0.936046	0.859477	no	no	n/a	n/a	n/a	n/a	n/a	n/a	n/a	n/a	n/a
11010535_G03	Extract	2014-11-25	0.929788	0.868449	0.899118	2014-12-05	1.02522	0.977156	0.921009	0.921009	0.835003	0.878006	no	no	n/a	n/a	n/a	n/a	n/a	n/a	n/a	n/a	n/a
11090304_C11	Extract	2014-11-19	0.871509	0.926179	0.898844	2014-12-05	0.947562	1.02452	0.870438	0.870438	0.957187	0.913812	no	no	n/a	n/a	n/a	n/a	n/a	n/a	n/a	n/a	n/a
11090204_G05	Extract	2014-11-19	0.863793	0.93377	0.898782	2014-12-04	0.838489	0.878567	0.933691	0.933691	0.923693	0.928692	no	no	n/a	n/a	n/a	n/a	n/a	n/a	n/a	n/a	n/a
11010535_B11	Extract	2014-11-25	0.98235	0.815212	0.898781	2014-12-05	0.8323	0.947066	0.829181	0.829181	0.708594	0.768888	no	no	n/a	n/a	n/a	n/a	n/a	n/a	n/a	n/a	n/a
11100807_B11	Extract	2014-11-19	1.15671	0.640464	0.898589	2014-12-04	1.45176	1.5057	1.0615	1.0615	1.11128	1.08639	no	no	n/a	n/a	n/a	n/a	n/a	n/a	n/a	n/a	n/a
11020901_A03	Extract	2014-11-24	0.899697	0.897451	0.898574	2014-12-05	0.829063	1.02223	1.0513	1.0513	0.892191	0.971747	no	no	n/a	n/a	n/a	n/a	n/a	n/a	n/a	n/a	n/a
11001218_H09	Extract	2014-11-25	0.939666	0.857383	0.898524	2014-12-05	0.948179	0.956299	0.95204	0.95204	0.896915	0.924477	no	no	n/a	n/a	n/a	n/a	n/a	n/a	n/a	n/a	n/a
11010216_B04	Extract	2014-11-25	0.965525	0.830886	0.898206	2014-12-05	1.02678	0.96372	0.9269	0.9269	0.899814	0.913357	no	no	n/a	n/a	n/a	n/a	n/a	n/a	n/a	n/a	n/a
11020708_G04	Extract	2014-11-24	0.90013	0.896179	0.898155	2014-12-05	1.28111	1.23554	1.20619	1.20619	1.20744	1.20682	no	no	n/a	n/a	n/a	n/a	n/a	n/a	n/a	n/a	n/a
11100807_D09	Extract	2014-11-19	0.903045	0.89236	0.897702	2014-12-04	0.851039	0.959057	0.83845	0.83845	0.889654	0.864052	no	no	n/a	n/a	n/a	n/a	n/a	n/a	n/a	n/a	n/a
11010402_F07	Extract	2014-11-25	0.987058	0.808291	0.897675	2014-12-05	0.854332	0.856841	0.765289	0.765289	0.648581	0.706935	no	no	n/a	n/a	n/a	n/a	n/a	n/a	n/a	n/a	n/a
11100903_E10	Extract	2014-11-19	0.954873	0.840212	0.897543	2014-12-04	0.941666	0.833863	0.74647	0.74647	0.81948	0.782975	no	no	n/a	n/a	n/a	n/a	n/a	n/a	n/a	n/a	n/a
11090304_H06	Extract	2014-11-19	0.927996	0.866936	0.897466	2014-12-05	0.916435	0.839117	0.87523	0.87523	0.895028	0.885129	no	no	n/a	n/a	n/a	n/a	n/a	n/a	n/a	n/a	n/a
11040208_F02	Extract	2014-11-19	0.822676	0.972003	0.89734	2014-12-05	0.866026	0.950914	0.789044	0.789044	0.865898	0.827471	no	no	n/a	n/a	n/a	n/a	n/a	n/a	n/a	n/a	n/a
11090205_A11	Extract	2014-11-19	0.961424	0.833132	0.897278	2014-12-04	0.918647	1.00977	0.881067	0.881067	0.923349	0.902208	no	no	n/a	n/a	n/a	n/a	n/a	n/a	n/a	n/a	n/a
11020709_C08	Extract	2014-11-24	0.968799	0.825687	0.897243	2014-12-05	1.01827	1.07265	0.822881	0.822881	1.01585	0.919368	no	no	n/a	n/a	n/a	n/a	n/a	n/a	n/a	n/a	n/a
11100906_E08	Extract	2014-11-19	1.23819	0.55538	0.896787	2014-12-04	0.268568	0.407305	0.433256	0.433256	0.457385	0.44532	no	no	n/a	n/a	n/a	n/a	n/a	n/a	n/a	n/a	n/a
11090205_D11	Extract	2014-11-19	0.909447	0.884106	0.896777	2014-12-04	0.853922	0.971631	0.822828	0.822828	0.885025	0.853927	no	no	n/a	n/a	n/a	n/a	n/a	n/a	n/a	n/a	n/a
11100702_F07	Extract	2014-11-19	0.879212	0.913035	0.896124	2014-11-20	1.0797	1.05959	0.86499	0.86499	1.03098	0.947983	no	no	n/a	n/a	n/a	n/a	n/a	n/a	n/a	n/a	n/a
11010535_H11	Extract	2014-11-25	0.853189	0.938552	0.895871	2014-12-05	0.822187	0.74496	0.809318	0.809318	0.949105	0.879212	no	no	n/a	n/a	n/a	n/a	n/a	n/a	n/a	n/a	n/a
11090205_F12	Extract	2014-11-19	0.871991	0.91948	0.895736	2014-12-04	0.848943	0.97471	1.00325	1.00325	0.994836	0.999045	no	no	n/a	n/a	n/a	n/a	n/a	n/a	n/a	n/a	n/a
11010341_G09	Extract	2014-11-25	0.914904	0.876313	0.895609	2014-12-05	0.979618	0.938205	0.935845	0.935845	0.941851	0.938848	no	no	n/a	n/a	n/a	n/a	n/a	n/a	n/a	n/a	n/a
11020901_E02	Extract	2014-11-24	0.902319	0.887792	0.895056	2014-12-05	0.75366	0.765102	0.825504	0.825504	0.889358	0.857431	no	no	n/a	n/a	n/a	n/a	n/a	n/a	n/a	n/a	n/a
11090501_H05	Extract	2014-11-19	0.918699	0.871298	0.894999	2014-12-05	0.909297	0.971248	0.945887	0.945887	0.941558	0.943722	no	no	n/a	n/a	n/a	n/a	n/a	n/a	n/a	n/a	n/a
11010119_A05	Extract	2014-11-25	0.899549	0.890396	0.894973	2014-12-05	1.03545	0.861268	0.898176	0.898176	0.869728	0.883952	no	no	n/a	n/a	n/a	n/a	n/a	n/a	n/a	n/a	n/a
11010535_H10	Extract	2014-11-25	0.821663	0.968032	0.894847	2014-12-05	0.811326	0.710395	0.772801	0.772801	0.720125	0.746463	no	no	n/a	n/a	n/a	n/a	n/a	n/a	n/a	n/a	n/a
11010216_F11	Extract	2014-11-25	0.93511	0.852805	0.893957	2014-12-05	0.868906	0.934494	0.843202	0.843202	0.985209	0.914205	no	no	n/a	n/a	n/a	n/a	n/a	n/a	n/a	n/a	n/a
11090301_G11	Extract	2014-11-19	0.91958	0.868078	0.893829	2014-12-05	0.976798	0.942718	0.892383	0.892383	0.840003	0.866193	no	no	n/a	n/a	n/a	n/a	n/a	n/a	n/a	n/a	n/a
11040303_F09	Extract	2014-11-19	0.752324	1.03508	0.893703	2014-12-05	0.936917	1.06494	0.776395	0.776395	0.798896	0.787645	no	no	n/a	n/a	n/a	n/a	n/a	n/a	n/a	n/a	n/a
11010402_G05	Extract	2014-11-25	0.974888	0.812515	0.893702	2014-12-05	0.847856	0.957028	0.694179	0.694179	0.762281	0.72823	no	no	n/a	n/a	n/a	n/a	n/a	n/a	n/a	n/a	n/a
11020709_B06	Extract	2014-11-24	0.962255	0.824435	0.893345	2014-12-05	0.443743	0.931079	0.575572	0.575572	0.628196	0.601884	no	no	n/a	n/a	n/a	n/a	n/a	n/a	n/a	n/a	n/a
11090204_G08	Extract	2014-11-19	0.787439	0.998837	0.893138	2014-12-04	0.954986	0.925353	0.994456	0.994456	0.947155	0.970806	no	no	n/a	n/a	n/a	n/a	n/a	n/a	n/a	n/a	n/a
11020711_A05	Extract	2014-11-24	0.887931	0.898286	0.893108	2014-12-05	0.900335	1.17429	0.863748	0.863748	0.974021	0.918884	no	no	n/a	n/a	n/a	n/a	n/a	n/a	n/a	n/a	n/a
11090501_D09	Extract	2014-11-19	0.890345	0.894959	0.892652	2014-12-05	0.951604	1.02499	0.800342	0.800342	0.868342	0.834342	no	no	n/a	n/a	n/a	n/a	n/a	n/a	n/a	n/a	n/a
11040208_B09	Extract	2014-11-19	0.941125	0.84397	0.892548	2014-12-05	1.2243	1.03945	0.840711	0.840711	1.07122	0.955967	no	no	n/a	n/a	n/a	n/a	n/a	n/a	n/a	n/a	n/a
11010402_C02	Extract	2014-11-25	0.888845	0.896131	0.892488	2014-12-05	0.831784	0.85954	0.822739	0.822739	0.676848	0.749793	no	no	n/a	n/a	n/a	n/a	n/a	n/a	n/a	n/a	n/a
11090201_A06	Extract	2014-11-19	1.01196	0.772959	0.892459	2014-12-04	0.965216	1.03943	1.01046	1.01046	1.06392	1.03719	no	no	n/a	n/a	n/a	n/a	n/a	n/a	n/a	n/a	n/a
11090201_E11	Extract	2014-11-19	0.932166	0.852687	0.892427	2014-12-04	0.889269	0.954764	0.860417	0.860417	1.04217	0.951295	no	no	n/a	n/a	n/a	n/a	n/a	n/a	n/a	n/a	n/a
11010402_D11	Extract	2014-11-25	0.943913	0.840167	0.89204	2014-12-05	0.841897	0.806422	0.781917	0.781917	0.761389	0.771653	no	no	n/a	n/a	n/a	n/a	n/a	n/a	n/a	n/a	n/a
11040302_C05	Extract	2014-11-19	0.888955	0.89471	0.891833	2014-12-05	0.9383	0.959645	0.858043	0.858043	0.817103	0.837573	no	no	n/a	n/a	n/a	n/a	n/a	n/a	n/a	n/a	n/a
11100905_H08	Extract	2014-11-19	0.882927	0.899717	0.891322	2014-12-04	0.850363	0.850967	0.810966	0.810966	0.844384	0.827675	no	no	n/a	n/a	n/a	n/a	n/a	n/a	n/a	n/a	n/a
11090302_F04	Extract	2014-11-19	0.976771	0.805639	0.891205	2014-12-05	0.877698	0.908176	0.694848	0.694848	0.945806	0.820327	no	no	n/a	n/a	n/a	n/a	n/a	n/a	n/a	n/a	n/a
11100302_B09	Extract	2014-11-19	1.09762	0.684498	0.891059	2014-11-21	0.881015	1.01642	0.722011	0.722011	0.936724	0.829368	no	no	n/a	n/a	n/a	n/a	n/a	n/a	n/a	n/a	n/a
11020708_D07	Extract	2014-11-24	0.907541	0.873314	0.890428	2014-12-05	0.645339	0.958382	0.572736	0.572736	0.641009	0.606872	no	no	n/a	n/a	n/a	n/a	n/a	n/a	n/a	n/a	n/a
11090201_A02	Extract	2014-11-19	0.93243	0.847859	0.890144	2014-12-04	1.09876	0.923827	0.871054	0.871054	1.0152	0.943128	no	no	n/a	n/a	n/a	n/a	n/a	n/a	n/a	n/a	n/a
11020901_A06	Extract	2014-11-24	0.872242	0.907528	0.889885	2014-12-05	0.820758	1.03204	0.820517	0.820517	0.82371	0.822113	no	no	n/a	n/a	n/a	n/a	n/a	n/a	n/a	n/a	n/a
11040303_A09	Extract	2014-11-19	0.827957	0.951336	0.889647	2014-12-05	0.979723	1.08436	0.704658	0.704658	0.915025	0.809842	no	no	n/a	n/a	n/a	n/a	n/a	n/a	n/a	n/a	n/a
11040208_F11	Extract	2014-11-19	0.841112	0.937988	0.88955	2014-12-05	0.911875	0.964251	0.835208	0.835208	0.857715	0.846461	no	no	n/a	n/a	n/a	n/a	n/a	n/a	n/a	n/a	n/a
11040302_A05	Extract	2014-11-19	0.893847	0.885092	0.88947	2014-12-05	1.03313	1.03072	0.834934	0.834934	0.85225	0.843592	no	no	n/a	n/a	n/a	n/a	n/a	n/a	n/a	n/a	n/a
11040302_G04	Extract	2014-11-19	0.883655	0.89524	0.889447	2014-12-05	0.987498	1.00646	0.876743	0.876743	0.795876	0.83631	no	no	n/a	n/a	n/a	n/a	n/a	n/a	n/a	n/a	n/a
11020901_D10	Extract	2014-11-24	0.965094	0.813525	0.889309	2014-12-05	0.610203	0.93801	0.819075	0.819075	0.783203	0.801139	no	no	n/a	n/a	n/a	n/a	n/a	n/a	n/a	n/a	n/a
11100206_A12	Extract	2014-11-19	0.889623	0.887689	0.888656	2014-11-21	1.03199	0.991988	0.84551	0.84551	1.0134	0.929453	no	no	n/a	n/a	n/a	n/a	n/a	n/a	n/a	n/a	n/a
11040302_A09	Extract	2014-11-19	0.832479	0.944583	0.888531	2014-12-05	0.968876	0.995532	0.850896	0.850896	0.86771	0.859303	no	no	n/a	n/a	n/a	n/a	n/a	n/a	n/a	n/a	n/a
11020709_B12	Extract	2014-11-24	0.894236	0.882535	0.888386	2014-12-05	0.819236	0.937055	0.673073	0.673073	0.867815	0.770444	no	no	n/a	n/a	n/a	n/a	n/a	n/a	n/a	n/a	n/a
11090302_C09	Extract	2014-11-19	0.908058	0.868535	0.888296	2014-12-05	0.968951	0.966453	0.813571	0.813571	0.878102	0.845836	no	no	n/a	n/a	n/a	n/a	n/a	n/a	n/a	n/a	n/a
11010402_D05	Extract	2014-11-25	0.962168	0.814313	0.88824	2014-12-05	0.923032	0.769135	0.73468	0.73468	0.607633	0.671156	no	no	n/a	n/a	n/a	n/a	n/a	n/a	n/a	n/a	n/a
11020901_G02	Extract	2014-11-24	0.891419	0.884017	0.887718	2014-12-05	1.01257	0.960311	0.797235	0.797235	0.913478	0.855356	no	no	n/a	n/a	n/a	n/a	n/a	n/a	n/a	n/a	n/a
11010402_H09	Extract	2014-11-25	0.954403	0.820934	0.887668	2014-12-05	0.837485	0.84418	0.749971	0.749971	0.724755	0.737363	no	no	n/a	n/a	n/a	n/a	n/a	n/a	n/a	n/a	n/a
11001218_A12	Extract	2014-11-25	0.911394	0.863872	0.887633	2014-12-05	0.899855	0.963951	0.970457	0.970457	0.916307	0.943382	no	no	n/a	n/a	n/a	n/a	n/a	n/a	n/a	n/a	n/a
11100807_A12	Extract	2014-11-19	0.924798	0.850173	0.887485	2014-12-04	0.883441	0.91896	0.864643	0.864643	1.22748	1.04606	no	no	n/a	n/a	n/a	n/a	n/a	n/a	n/a	n/a	n/a
11090304_G10	Extract	2014-11-19	0.907397	0.867393	0.887395	2014-12-05	0.848485	0.954454	0.898857	0.898857	0.936694	0.917776	no	no	n/a	n/a	n/a	n/a	n/a	n/a	n/a	n/a	n/a
11090204_F04	Extract	2014-11-19	0.896898	0.877726	0.887312	2014-12-04	0.890756	0.903372	0.941209	0.941209	0.89538	0.918294	no	no	n/a	n/a	n/a	n/a	n/a	n/a	n/a	n/a	n/a
11040208_C04	Extract	2014-11-19	0.836785	0.937635	0.88721	2014-12-05	0.973331	1.02539	0.945523	0.945523	0.856507	0.901015	no	no	n/a	n/a	n/a	n/a	n/a	n/a	n/a	n/a	n/a
11020901_E08	Extract	2014-11-24	0.899047	0.874566	0.886806	2014-12-05	0.777925	1.00358	0.562761	0.562761	0.789865	0.676313	no	no	n/a	n/a	n/a	n/a	n/a	n/a	n/a	n/a	n/a
11010402_E03	Extract	2014-11-25	0.865056	0.908174	0.886615	2014-12-05	0.981387	0.909307	0.905985	0.905985	0.73919	0.822588	no	no	n/a	n/a	n/a	n/a	n/a	n/a	n/a	n/a	n/a
11040302_A07	Extract	2014-11-19	0.924054	0.849133	0.886593	2014-12-05	0.983071	1.04333	0.896539	0.896539	0.931391	0.913965	no	no	n/a	n/a	n/a	n/a	n/a	n/a	n/a	n/a	n/a
11090304_D09	Extract	2014-11-19	0.959037	0.814135	0.886586	2014-12-05	1.02934	1.00868	0.727219	0.727219	0.858226	0.792722	no	no	n/a	n/a	n/a	n/a	n/a	n/a	n/a	n/a	n/a
11100702_E09	Extract	2014-11-19	0.967751	0.805403	0.886577	2014-11-20	1.09722	1.41181	0.809193	0.809193	1.00266	0.905927	no	no	n/a	n/a	n/a	n/a	n/a	n/a	n/a	n/a	n/a
11010216_D11	Extract	2014-11-25	0.976298	0.796822	0.88656	2014-12-05	0.899389	1.01821	0.902065	0.902065	0.872659	0.887362	no	no	n/a	n/a	n/a	n/a	n/a	n/a	n/a	n/a	n/a
11100702_A02	Extract	2014-11-19	0.931356	0.8416	0.886478	2014-11-20	0.982462	1.04511	1.0024	1.0024	0.965161	0.983781	no	no	n/a	n/a	n/a	n/a	n/a	n/a	n/a	n/a	n/a
11090501_H02	Extract	2014-11-19	0.984526	0.787985	0.886256	2014-12-05	0.923786	0.918243	0.870998	0.870998	0.915845	0.893422	no	no	n/a	n/a	n/a	n/a	n/a	n/a	n/a	n/a	n/a
11100806_B11	Extract	2014-11-19	0.958641	0.813442	0.886042	2014-11-20	1.08324	1.05103	0.938255	0.938255	0.935345	0.9368	no	no	n/a	n/a	n/a	n/a	n/a	n/a	n/a	n/a	n/a
11090201_E05	Extract	2014-11-19	0.82802	0.943886	0.885953	2014-12-04	0.853922	0.772756	0.912698	0.912698	0.841851	0.877274	no	no	n/a	n/a	n/a	n/a	n/a	n/a	n/a	n/a	n/a
11090302_F09	Extract	2014-11-19	0.916474	0.854307	0.88539	2014-12-05	0.927591	0.899541	0.739299	0.739299	0.826028	0.782663	no	no	n/a	n/a	n/a	n/a	n/a	n/a	n/a	n/a	n/a
11040209_A04	Extract	2014-11-19	0.88346	0.887055	0.885257	2014-12-05	1.08042	0.967893	0.839068	0.839068	0.853458	0.846263	no	no	n/a	n/a	n/a	n/a	n/a	n/a	n/a	n/a	n/a
11100805_E04	Extract	2014-11-19	0.978405	0.791524	0.884964	2014-11-20	0.951231	1.06747	0.679618	0.679618	0.79303	0.736324	no	no	n/a	n/a	n/a	n/a	n/a	n/a	n/a	n/a	n/a
11020708_E09	Extract	2014-11-24	0.897292	0.872042	0.884667	2014-12-05	1.04825	1.37685	0.975431	0.975431	0.963249	0.96934	no	no	n/a	n/a	n/a	n/a	n/a	n/a	n/a	n/a	n/a
11020708_D06	Extract	2014-11-24	0.990598	0.778706	0.884652	2014-12-05	0.911054	1.11498	0.908894	0.908894	0.851148	0.880021	no	no	n/a	n/a	n/a	n/a	n/a	n/a	n/a	n/a	n/a
11090304_A03	Extract	2014-11-19	0.964567	0.804725	0.884646	2014-12-05	0.661866	1.0586	0.908442	0.908442	0.826352	0.867397	no	no	n/a	n/a	n/a	n/a	n/a	n/a	n/a	n/a	n/a
11090304_D07	Extract	2014-11-19	1.01002	0.759072	0.884544	2014-12-05	0.775572	0.96142	0.814412	0.814412	0.898595	0.856503	no	no	n/a	n/a	n/a	n/a	n/a	n/a	n/a	n/a	n/a
11100905_E03	Extract	2014-11-19	0.790278	0.978713	0.884495	2014-12-04	0.925803	0.928654	0.900866	0.900866	0.832522	0.866694	no	no	n/a	n/a	n/a	n/a	n/a	n/a	n/a	n/a	n/a
11100701_D08	Extract	2014-11-19	1.07766	0.691011	0.884338	2014-12-04	0.946599	0.996533	1.01394	1.01394	0.903894	0.958916	no	no	n/a	n/a	n/a	n/a	n/a	n/a	n/a	n/a	n/a
11100304_F12	Extract	2014-11-19	0.957061	0.81145	0.884255	2014-12-04	0.893153	0.848309	0.914315	0.914315	0.987461	0.950888	no	no	n/a	n/a	n/a	n/a	n/a	n/a	n/a	n/a	n/a
11100804_B08	Extract	2014-11-19	0.956877	0.811222	0.88405	2014-11-20	1.00106	1.05323	0.917937	0.917937	0.997762	0.95785	no	no	n/a	n/a	n/a	n/a	n/a	n/a	n/a	n/a	n/a
11100905_F10	Extract	2014-11-19	0.901206	0.866178	0.883692	2014-12-04	0.866902	0.987422	0.941617	0.941617	0.844384	0.893001	no	no	n/a	n/a	n/a	n/a	n/a	n/a	n/a	n/a	n/a
11100702_C06	Extract	2014-11-19	0.940223	0.827121	0.883672	2014-11-20	1.13446	1.02451	0.812328	0.812328	0.954079	0.883204	no	no	n/a	n/a	n/a	n/a	n/a	n/a	n/a	n/a	n/a
11020708_E08	Extract	2014-11-24	0.980349	0.786676	0.883512	2014-12-05	0.885681	1.16736	0.966165	0.966165	0.894233	0.930199	no	no	n/a	n/a	n/a	n/a	n/a	n/a	n/a	n/a	n/a
11040209_B02	Extract	2014-11-19	0.827178	0.939774	0.883476	2014-12-05	1.03033	0.971776	0.858317	0.858317	0.880754	0.869535	no	no	n/a	n/a	n/a	n/a	n/a	n/a	n/a	n/a	n/a
11100303_E05	Extract	2014-11-19	0.966529	0.800257	0.883393	2014-12-04	0.919489	0.807561	0.870462	0.870462	0.907259	0.88886	no	no	n/a	n/a	n/a	n/a	n/a	n/a	n/a	n/a	n/a
11100903_A04	Extract	2014-11-19	1.04051	0.726043	0.883278	2014-12-04	0.914243	0.895542	0.947172	0.947172	0.79972	0.873446	no	no	n/a	n/a	n/a	n/a	n/a	n/a	n/a	n/a	n/a
11090206_C04	Extract	2014-11-19	0.935796	0.830707	0.883252	2014-12-04	0.975174	0.868594	1.02518	1.02518	0.891218	0.9582	no	no	n/a	n/a	n/a	n/a	n/a	n/a	n/a	n/a	n/a
11020708_H07	Extract	2014-11-24	0.908841	0.856103	0.882472	2014-12-05	0.917186	1.10634	0.90081	0.90081	0.911691	0.906251	no	no	n/a	n/a	n/a	n/a	n/a	n/a	n/a	n/a	n/a
11020901_C10	Extract	2014-11-24	0.921279	0.843524	0.882402	2014-12-05	0.841522	1.04802	0.856846	0.856846	0.863476	0.860161	no	no	n/a	n/a	n/a	n/a	n/a	n/a	n/a	n/a	n/a
11010402_B06	Extract	2014-11-25	0.893278	0.871175	0.882227	2014-12-05	1.03845	0.89415	0.939295	0.939295	0.777866	0.858581	no	no	n/a	n/a	n/a	n/a	n/a	n/a	n/a	n/a	n/a
11090304_A11	Extract	2014-11-19	0.933988	0.830213	0.8821	2014-12-05	0.984172	0.911039	0.955752	0.955752	0.887214	0.921483	no	no	n/a	n/a	n/a	n/a	n/a	n/a	n/a	n/a	n/a
11090206_F06	Extract	2014-11-19	0.84783	0.916181	0.882006	2014-12-04	0.869601	0.875234	1.23147	1.23147	0.834282	1.03287	no	no	n/a	n/a	n/a	n/a	n/a	n/a	n/a	n/a	n/a
11090206_D09	Extract	2014-11-19	0.838911	0.924986	0.881949	2014-12-04	0.90594	0.934818	0.891111	0.891111	1.0021	0.946603	no	no	n/a	n/a	n/a	n/a	n/a	n/a	n/a	n/a	n/a
11020709_A03	Extract	2014-11-24	0.92999	0.833865	0.881928	2014-12-05	1.01409	1.11096	1.03204	1.03204	1.06027	1.04615	no	no	n/a	n/a	n/a	n/a	n/a	n/a	n/a	n/a	n/a
11090304_G07	Extract	2014-11-19	0.932446	0.831355	0.8819	2014-12-05	0.91263	1.04324	0.845942	0.845942	0.96338	0.904661	no	no	n/a	n/a	n/a	n/a	n/a	n/a	n/a	n/a	n/a
11020901_F08	Extract	2014-11-24	0.945245	0.818552	0.881899	2014-12-05	0.722438	0.952425	0.735497	0.735497	0.76577	0.750634	no	no	n/a	n/a	n/a	n/a	n/a	n/a	n/a	n/a	n/a
11010216_B11	Extract	2014-11-25	0.853511	0.909865	0.881688	2014-12-05	0.995338	0.915963	0.979374	0.979374	0.871049	0.925211	no	no	n/a	n/a	n/a	n/a	n/a	n/a	n/a	n/a	n/a
11040208_G12	Extract	2014-11-19	0.826398	0.93691	0.881654	2014-12-05	0.929667	0.945343	0.831648	0.831648	1.023	0.927325	no	no	n/a	n/a	n/a	n/a	n/a	n/a	n/a	n/a	n/a
11020708_G03	Extract	2014-11-24	0.858287	0.904378	0.881333	2014-12-05	1.08941	1.1639	0.925534	0.925534	1.00251	0.96402	no	no	n/a	n/a	n/a	n/a	n/a	n/a	n/a	n/a	n/a
11010402_E07	Extract	2014-11-25	0.90878	0.853709	0.881244	2014-12-05	0.942484	0.900694	0.815761	0.815761	0.73919	0.777476	no	no	n/a	n/a	n/a	n/a	n/a	n/a	n/a	n/a	n/a
11010402_C06	Extract	2014-11-25	0.887193	0.874171	0.880682	2014-12-05	0.881807	0.910207	0.81012	0.81012	0.677998	0.744059	no	no	n/a	n/a	n/a	n/a	n/a	n/a	n/a	n/a	n/a
11010416_F04	Extract	2014-11-25	0.895206	0.866052	0.880629	2014-12-05	0.872984	0.946166	0.751869	0.751869	0.755351	0.75361	no	no	n/a	n/a	n/a	n/a	n/a	n/a	n/a	n/a	n/a
11040209_G05	Extract	2014-11-19	0.868941	0.891863	0.880402	2014-12-05	0.881853	1.02223	0.711805	0.711805	0.734067	0.722936	no	no	n/a	n/a	n/a	n/a	n/a	n/a	n/a	n/a	n/a
11100905_D09	Extract	2014-11-19	0.837622	0.922865	0.880244	2014-12-04	0.982022	0.871228	0.727701	0.727701	0.8055	0.7666	no	no	n/a	n/a	n/a	n/a	n/a	n/a	n/a	n/a	n/a
11020709_A04	Extract	2014-11-24	0.831916	0.928306	0.880111	2014-12-05	2.58786	1.96868	2.46926	2.46926	1.89421	2.18173	no	no	n/a	n/a	n/a	n/a	n/a	n/a	n/a	n/a	n/a
11020901_C08	Extract	2014-11-24	0.962905	0.797148	0.880027	2014-12-05	0.72396	0.934936	0.636531	0.636531	0.845763	0.741147	no	no	n/a	n/a	n/a	n/a	n/a	n/a	n/a	n/a	n/a
11010216_G06	Extract	2014-11-25	0.896065	0.863872	0.879969	2014-12-05	0.969286	1.02192	0.84598	0.84598	0.79345	0.819715	no	no	n/a	n/a	n/a	n/a	n/a	n/a	n/a	n/a	n/a
11090304_F08	Extract	2014-11-19	0.900303	0.859354	0.879829	2014-12-05	0.902869	1.02957	0.766597	0.766597	0.852065	0.809331	no	no	n/a	n/a	n/a	n/a	n/a	n/a	n/a	n/a	n/a
11090206_A09	Extract	2014-11-19	0.932166	0.826993	0.879579	2014-12-04	0.938315	0.985192	1.03301	1.03301	1.02938	1.03119	no	no	n/a	n/a	n/a	n/a	n/a	n/a	n/a	n/a	n/a
11020711_G03	Extract	2014-11-24	0.930857	0.828211	0.879534	2014-12-05	1.0721	0.921284	0.711293	0.711293	0.814496	0.762894	no	no	n/a	n/a	n/a	n/a	n/a	n/a	n/a	n/a	n/a
11010416_E02	Extract	2014-11-25	0.946391	0.812515	0.879453	2014-12-05	1.0553	1.05049	0.845542	0.845542	0.843112	0.844327	no	no	n/a	n/a	n/a	n/a	n/a	n/a	n/a	n/a	n/a
11090204_A05	Extract	2014-11-19	0.939426	0.819302	0.879364	2014-12-04	1.00656	0.882154	0.856642	0.856642	1.01971	0.938176	no	no	n/a	n/a	n/a	n/a	n/a	n/a	n/a	n/a	n/a
11010216_H05	Extract	2014-11-25	0.903328	0.855228	0.879278	2014-12-05	0.877582	0.817014	0.705168	0.705168	0.792805	0.748987	no	no	n/a	n/a	n/a	n/a	n/a	n/a	n/a	n/a	n/a
11020711_G02	Extract	2014-11-24	0.887042	0.871416	0.879229	2014-12-05	1.13713	1.06861	1.04844	1.04844	1.06284	1.05564	no	no	n/a	n/a	n/a	n/a	n/a	n/a	n/a	n/a	n/a
11100102_G10	Extract	2014-11-19	0.922766	0.835086	0.878926	2014-11-21	0.94016	0.990895	0.69423	0.69423	0.833368	0.763799	no	no	n/a	n/a	n/a	n/a	n/a	n/a	n/a	n/a	n/a
11100304_F07	Extract	2014-11-19	0.93089	0.826783	0.878837	2014-12-04	0.777524	0.821684	0.870462	0.870462	0.871774	0.871118	no	no	n/a	n/a	n/a	n/a	n/a	n/a	n/a	n/a	n/a
11001218_A09	Extract	2014-11-25	0.872081	0.884445	0.878263	2014-12-05	0.956389	0.941686	0.831757	0.831757	0.964496	0.898127	no	no	n/a	n/a	n/a	n/a	n/a	n/a	n/a	n/a	n/a
11100305_A02	Extract	2014-11-19	0.936159	0.819913	0.878036	2014-12-04	0.976205	0.902488	0.853904	0.853904	0.838819	0.846362	no	no	n/a	n/a	n/a	n/a	n/a	n/a	n/a	n/a	n/a
11090204_A02	Extract	2014-11-19	0.960222	0.795792	0.878007	2014-12-04	0.888749	0.842771	0.912074	0.912074	0.994836	0.953455	no	no	n/a	n/a	n/a	n/a	n/a	n/a	n/a	n/a	n/a
11010402_B02	Extract	2014-11-25	0.863404	0.891906	0.877655	2014-12-05	0.997976	0.980552	0.842067	0.842067	0.684353	0.76321	no	no	n/a	n/a	n/a	n/a	n/a	n/a	n/a	n/a	n/a
11001218_H05	Extract	2014-11-25	0.929992	0.824935	0.877463	2014-12-05	1.01903	0.90483	0.873342	0.873342	0.907899	0.890621	no	no	n/a	n/a	n/a	n/a	n/a	n/a	n/a	n/a	n/a
11010535_D10	Extract	2014-11-25	0.841019	0.913866	0.877443	2014-12-05	0.951823	0.88963	0.877247	0.877247	0.861574	0.86941	no	no	n/a	n/a	n/a	n/a	n/a	n/a	n/a	n/a	n/a
11020901_F10	Extract	2014-11-24	0.938051	0.816237	0.877144	2014-12-05	0.643165	0.880921	0.674018	0.674018	0.781672	0.727845	no	no	n/a	n/a	n/a	n/a	n/a	n/a	n/a	n/a	n/a
11100302_F12	Extract	2014-11-19	0.962301	0.791733	0.877017	2014-11-21	0.784517	0.808901	0.884596	0.884596	0.950955	0.917775	no	no	n/a	n/a	n/a	n/a	n/a	n/a	n/a	n/a	n/a
11090205_A04	Extract	2014-11-19	0.993591	0.76044	0.877015	2014-12-04	1.09251	0.960641	0.925861	0.925861	0.933016	0.929439	no	no	n/a	n/a	n/a	n/a	n/a	n/a	n/a	n/a	n/a
11090501_D03	Extract	2014-11-19	0.917818	0.836173	0.876995	2014-12-05	1.03076	1.08406	0.833554	0.833554	0.900865	0.867209	no	no	n/a	n/a	n/a	n/a	n/a	n/a	n/a	n/a	n/a
11090206_D03	Extract	2014-11-19	0.891585	0.862345	0.876965	2014-12-04	0.886024	0.820789	0.776506	0.776506	1.00416	0.890333	no	no	n/a	n/a	n/a	n/a	n/a	n/a	n/a	n/a	n/a
11100905_G11	Extract	2014-11-19	0.820757	0.933041	0.876899	2014-12-04	0.837452	0.88587	0.745417	0.745417	0.921246	0.833331	no	no	n/a	n/a	n/a	n/a	n/a	n/a	n/a	n/a	n/a
11090301_A06	Extract	2014-11-19	0.883912	0.8697	0.876806	2014-12-05	0.911661	0.963328	0.853537	0.853537	0.990747	0.922142	no	no	n/a	n/a	n/a	n/a	n/a	n/a	n/a	n/a	n/a
11010416_G07	Extract	2014-11-25	0.874197	0.879294	0.876746	2014-12-05	0.781013	0.904765	0.773068	0.773068	0.781892	0.77748	no	no	n/a	n/a	n/a	n/a	n/a	n/a	n/a	n/a	n/a
11010416_D10	Extract	2014-11-25	0.94529	0.807093	0.876191	2014-12-05	0.820123	0.73547	0.750532	0.750532	0.712045	0.731289	no	no	n/a	n/a	n/a	n/a	n/a	n/a	n/a	n/a	n/a
11090301_C06	Extract	2014-11-19	1.01356	0.738654	0.876109	2014-12-05	0.75657	1.01493	0.752808	0.752808	0.766495	0.759652	no	no	n/a	n/a	n/a	n/a	n/a	n/a	n/a	n/a	n/a
11040303_G05	Extract	2014-11-19	0.865414	0.886701	0.876057	2014-12-05	1.02173	0.963046	0.785458	0.785458	0.859225	0.822341	no	no	n/a	n/a	n/a	n/a	n/a	n/a	n/a	n/a	n/a
11090304_F07	Extract	2014-11-19	0.969898	0.782001	0.87595	2014-12-05	0.960396	0.987565	0.867887	0.867887	0.85401	0.860949	no	no	n/a	n/a	n/a	n/a	n/a	n/a	n/a	n/a	n/a
11100304_A03	Extract	2014-11-19	0.949584	0.802077	0.87583	2014-12-04	0.988761	0.920715	0.917061	0.917061	0.88045	0.898755	no	no	n/a	n/a	n/a	n/a	n/a	n/a	n/a	n/a	n/a
11020708_F02	Extract	2014-11-24	0.942645	0.808685	0.875665	2014-12-05	0.715654	0.926287	0.626343	0.626343	0.617425	0.621884	no	no	n/a	n/a	n/a	n/a	n/a	n/a	n/a	n/a	n/a
11090204_A10	Extract	2014-11-19	0.910193	0.841042	0.875617	2014-12-04	0.971186	0.961913	1.01766	1.01766	1.00867	1.01317	no	no	n/a	n/a	n/a	n/a	n/a	n/a	n/a	n/a	n/a
11040303_A06	Extract	2014-11-19	0.86366	0.887408	0.875534	2014-12-05	1.01475	1.01131	0.811031	0.811031	0.965964	0.888497	no	no	n/a	n/a	n/a	n/a	n/a	n/a	n/a	n/a	n/a
11040302_G06	Extract	2014-11-19	0.842281	0.908606	0.875443	2014-12-05	0.976375	0.973706	0.783541	0.783541	0.974449	0.878995	no	no	n/a	n/a	n/a	n/a	n/a	n/a	n/a	n/a	n/a
11040302_H04	Extract	2014-11-19	0.865998	0.884739	0.875369	2014-12-05	0.999756	0.997727	0.86382	0.86382	1.00935	0.936587	no	no	n/a	n/a	n/a	n/a	n/a	n/a	n/a	n/a	n/a
11020708_H06	Extract	2014-11-24	0.907324	0.843107	0.875216	2014-12-05	0.923969	1.15407	0.853774	0.853774	0.93502	0.894397	no	no	n/a	n/a	n/a	n/a	n/a	n/a	n/a	n/a	n/a
11040209_C06	Extract	2014-11-19	0.785239	0.965055	0.875147	2014-12-05	0.965279	1.02828	0.728561	0.728561	0.758012	0.743287	no	no	n/a	n/a	n/a	n/a	n/a	n/a	n/a	n/a	n/a
11020709_C03	Extract	2014-11-24	0.958333	0.791912	0.875123	2014-12-05	1.0848	1.08304	0.847581	0.847581	0.944515	0.896048	no	no	n/a	n/a	n/a	n/a	n/a	n/a	n/a	n/a	n/a
11010416_A10	Extract	2014-11-25	0.843222	0.906976	0.875099	2014-12-05	0.909798	0.802126	0.775474	0.775474	0.729959	0.752717	no	no	n/a	n/a	n/a	n/a	n/a	n/a	n/a	n/a	n/a
11090304_D12	Extract	2014-11-19	0.899422	0.849945	0.874683	2014-12-05	0.883157	0.91872	0.81301	0.81301	0.879399	0.846205	no	no	n/a	n/a	n/a	n/a	n/a	n/a	n/a	n/a	n/a
11010402_H03	Extract	2014-11-25	0.903245	0.84559	0.874418	2014-12-05	0.897621	0.78427	0.784082	0.784082	0.729643	0.756863	no	no	n/a	n/a	n/a	n/a	n/a	n/a	n/a	n/a	n/a
11010216_H03	Extract	2014-11-25	0.921363	0.827358	0.87436	2014-12-05	0.845467	0.867768	0.917427	0.917427	0.767261	0.842344	no	no	n/a	n/a	n/a	n/a	n/a	n/a	n/a	n/a	n/a
11040208_C10	Extract	2014-11-19	0.842281	0.905034	0.873658	2014-12-05	1.00559	1.03291	0.841834	0.841834	1.03937	0.940601	no	no	n/a	n/a	n/a	n/a	n/a	n/a	n/a	n/a	n/a
11100701_G08	Extract	2014-11-19	1.06094	0.685755	0.873347	2014-12-04	0.85476	0.942806	0.950726	0.950726	0.90445	0.927588	no	no	n/a	n/a	n/a	n/a	n/a	n/a	n/a	n/a	n/a
11100906_H06	Extract	2014-11-19	0.915244	0.831349	0.873297	2014-12-04	0.915843	0.980437	1.06282	1.06282	0.945878	1.00435	no	no	n/a	n/a	n/a	n/a	n/a	n/a	n/a	n/a	n/a
11040303_F12	Extract	2014-11-19	0.897374	0.848956	0.873165	2014-12-05	0.911875	0.986319	0.891337	0.891337	0.841953	0.866645	no	no	n/a	n/a	n/a	n/a	n/a	n/a	n/a	n/a	n/a
11010416_G06	Extract	2014-11-25	0.935322	0.810718	0.87302	2014-12-05	0.782045	1.01788	0.823273	0.823273	0.793739	0.808506	no	no	n/a	n/a	n/a	n/a	n/a	n/a	n/a	n/a	n/a
11040302_E10	Extract	2014-11-19	0.808372	0.937458	0.872915	2014-12-05	0.806562	1.05013	0.646667	0.646667	0.731954	0.68931	no	no	n/a	n/a	n/a	n/a	n/a	n/a	n/a	n/a	n/a
11100906_G11	Extract	2014-11-19	0.868303	0.87743	0.872867	2014-12-04	0.864851	0.932258	0.859615	0.859615	0.984459	0.922037	no	no	n/a	n/a	n/a	n/a	n/a	n/a	n/a	n/a	n/a
11090204_A08	Extract	2014-11-19	0.910193	0.835099	0.872646	2014-12-04	0.997096	0.934309	0.958739	0.958739	0.978255	0.968497	no	no	n/a	n/a	n/a	n/a	n/a	n/a	n/a	n/a	n/a
11020709_F07	Extract	2014-11-24	0.937184	0.808059	0.872622	2014-12-05	0.565457	1.06072	0.473392	0.473392	0.845763	0.659577	no	no	n/a	n/a	n/a	n/a	n/a	n/a	n/a	n/a	n/a
11090301_H11	Extract	2014-11-19	0.918919	0.825851	0.872385	2014-12-05	0.946853	0.948944	0.863123	0.863123	0.993665	0.928394	no	no	n/a	n/a	n/a	n/a	n/a	n/a	n/a	n/a	n/a
11090204_H02	Extract	2014-11-19	0.968684	0.775822	0.872253	2014-12-04	0.762344	0.703021	0.851963	0.851963	0.907455	0.879709	no	no	n/a	n/a	n/a	n/a	n/a	n/a	n/a	n/a	n/a
11020711_C12	Extract	2014-11-24	0.985593	0.758366	0.87198	2014-12-05	1.01344	1.05841	1.02443	1.02443	0.995588	1.01001	no	no	n/a	n/a	n/a	n/a	n/a	n/a	n/a	n/a	n/a
11100804_G02	Extract	2014-11-19	0.926923	0.816862	0.871892	2014-11-20	0.996636	0.963807	0.724529	0.724529	1.01007	0.867299	no	no	n/a	n/a	n/a	n/a	n/a	n/a	n/a	n/a	n/a
11020711_F10	Extract	2014-11-24	0.925418	0.817509	0.871464	2014-12-05	0.851806	0.993189	0.787733	0.787733	0.835502	0.811618	no	no	n/a	n/a	n/a	n/a	n/a	n/a	n/a	n/a	n/a
11020709_G09	Extract	2014-11-24	0.939373	0.802614	0.870993	2014-12-05	1.07867	1.11691	0.857792	0.857792	0.895534	0.876663	no	no	n/a	n/a	n/a	n/a	n/a	n/a	n/a	n/a	n/a
11040303_A02	Extract	2014-11-19	0.924444	0.817469	0.870956	2014-12-05	1.15164	1.02247	0.950205	0.950205	0.686812	0.818509	no	no	n/a	n/a	n/a	n/a	n/a	n/a	n/a	n/a	n/a
11010416_G10	Extract	2014-11-25	0.915691	0.825757	0.870724	2014-12-05	0.821413	0.844405	0.778442	0.778442	0.790547	0.784495	no	no	n/a	n/a	n/a	n/a	n/a	n/a	n/a	n/a	n/a
11020711_A09	Extract	2014-11-24	0.91038	0.830089	0.870234	2014-12-05	0.640751	1.00608	0.476464	0.476464	0.518851	0.497658	no	no	n/a	n/a	n/a	n/a	n/a	n/a	n/a	n/a	n/a
11020711_B06	Extract	2014-11-24	0.916469	0.823997	0.870233	2014-12-05	0.84437	1.11941	0.79629	0.79629	1.00636	0.901325	no	no	n/a	n/a	n/a	n/a	n/a	n/a	n/a	n/a	n/a
11100807_A11	Extract	2014-11-19	0.887997	0.852324	0.87016	2014-12-04	0.884117	0.943049	0.776586	0.776586	1.02247	0.899526	no	no	n/a	n/a	n/a	n/a	n/a	n/a	n/a	n/a	n/a
11020708_F11	Extract	2014-11-24	0.904919	0.834699	0.869809	2014-12-05	0.728982	0.959738	0.660498	0.660498	0.840377	0.750438	no	no	n/a	n/a	n/a	n/a	n/a	n/a	n/a	n/a	n/a
11100903_G06	Extract	2014-11-19	0.8557	0.883905	0.869802	2014-12-04	0.8345	0.865385	0.740389	0.740389	0.816121	0.778255	no	no	n/a	n/a	n/a	n/a	n/a	n/a	n/a	n/a	n/a
11040303_D11	Extract	2014-11-19	0.760742	0.978774	0.869758	2014-12-05	0.949147	0.918669	0.734886	0.734886	0.82284	0.778863	no	no	n/a	n/a	n/a	n/a	n/a	n/a	n/a	n/a	n/a
11040303_C08	Extract	2014-11-19	0.835032	0.90415	0.869591	2014-12-05	0.808776	0.935407	0.651897	0.651897	0.709821	0.680859	no	no	n/a	n/a	n/a	n/a	n/a	n/a	n/a	n/a	n/a
11040209_C10	Extract	2014-11-19	0.796406	0.94209	0.869248	2014-12-05	1.01254	0.903378	0.803063	0.803063	0.903793	0.853428	no	no	n/a	n/a	n/a	n/a	n/a	n/a	n/a	n/a	n/a
11090201_A11	Extract	2014-11-19	0.913558	0.824567	0.869063	2014-12-04	0.966455	0.945554	0.973806	0.973806	0.912306	0.943056	no	no	n/a	n/a	n/a	n/a	n/a	n/a	n/a	n/a	n/a
11010402_A11	Extract	2014-11-25	0.883036	0.854308	0.868672	2014-12-05	0.886476	0.803273	0.850381	0.850381	0.922794	0.886587	no	no	n/a	n/a	n/a	n/a	n/a	n/a	n/a	n/a	n/a
11090201_A04	Extract	2014-11-19	0.908486	0.82874	0.868613	2014-12-04	0.91191	0.934309	0.917408	0.917408	0.878455	0.897931	no	no	n/a	n/a	n/a	n/a	n/a	n/a	n/a	n/a	n/a
11100807_G04	Extract	2014-11-19	0.940048	0.796949	0.868499	2014-12-04	1.00174	0.910184	0.856166	0.856166	0.867473	0.86182	no	no	n/a	n/a	n/a	n/a	n/a	n/a	n/a	n/a	n/a
11100302_B07	Extract	2014-11-19	1.0368	0.699647	0.868225	2014-11-21	0.974584	0.950226	0.927103	0.927103	1.01897	0.973037	no	no	n/a	n/a	n/a	n/a	n/a	n/a	n/a	n/a	n/a
11100805_E07	Extract	2014-11-19	0.952223	0.784084	0.868153	2014-11-20	1.09565	1.06616	0.848091	0.848091	0.867417	0.857754	no	no	n/a	n/a	n/a	n/a	n/a	n/a	n/a	n/a	n/a
11100807_F02	Extract	2014-11-19	0.889229	0.846494	0.867861	2014-12-04	0.757506	1.11024	0.940038	0.940038	0.702252	0.821145	no	no	n/a	n/a	n/a	n/a	n/a	n/a	n/a	n/a	n/a
11090205_E12	Extract	2014-11-19	0.859923	0.875541	0.867732	2014-12-04	0.93408	0.984428	0.918967	0.918967	0.895036	0.907002	no	no	n/a	n/a	n/a	n/a	n/a	n/a	n/a	n/a	n/a
11020901_A09	Extract	2014-11-24	0.892286	0.843107	0.867696	2014-12-05	0.732483	1.06053	0.734315	0.734315	0.888847	0.811581	no	no	n/a	n/a	n/a	n/a	n/a	n/a	n/a	n/a	n/a
11090205_B05	Extract	2014-11-19	0.990682	0.744424	0.867553	2014-12-04	1.02224	0.961149	1.01985	1.01985	1.06773	1.04379	no	no	n/a	n/a	n/a	n/a	n/a	n/a	n/a	n/a	n/a
11100805_F11	Extract	2014-11-19	0.861478	0.873198	0.867338	2014-11-20	1.16659	1.26711	0.745104	0.745104	1.08788	0.916494	no	no	n/a	n/a	n/a	n/a	n/a	n/a	n/a	n/a	n/a
11100906_G04	Extract	2014-11-19	0.940856	0.79198	0.866418	2014-12-04	1.03804	0.987422	0.982105	0.982105	0.873253	0.927679	no	no	n/a	n/a	n/a	n/a	n/a	n/a	n/a	n/a	n/a
11010216_G10	Extract	2014-11-25	0.852439	0.880379	0.866409	2014-12-05	0.932227	1.0124	0.977707	0.977707	0.842895	0.910301	no	no	n/a	n/a	n/a	n/a	n/a	n/a	n/a	n/a	n/a
11020901_E10	Extract	2014-11-24	0.91103	0.821702	0.866366	2014-12-05	0.866004	0.970125	0.83477	0.83477	0.888337	0.861553	no	no	n/a	n/a	n/a	n/a	n/a	n/a	n/a	n/a	n/a
11090501_F05	Extract	2014-11-19	0.92934	0.802441	0.86589	2014-12-05	0.931396	0.935991	0.87523	0.87523	0.886241	0.880736	no	no	n/a	n/a	n/a	n/a	n/a	n/a	n/a	n/a	n/a
11090205_G06	Extract	2014-11-19	0.818861	0.912445	0.865653	2014-12-04	0.85142	0.940186	0.926797	0.926797	0.964081	0.945439	no	no	n/a	n/a	n/a	n/a	n/a	n/a	n/a	n/a	n/a
11040302_E09	Extract	2014-11-19	0.745659	0.985546	0.865602	2014-12-05	0.951914	0.958921	0.851718	0.851718	0.846181	0.848949	no	no	n/a	n/a	n/a	n/a	n/a	n/a	n/a	n/a	n/a
11090302_A11	Extract	2014-11-19	0.949277	0.781773	0.865525	2014-12-05	0.961341	0.984917	0.822595	0.822595	1.05719	0.939891	no	no	n/a	n/a	n/a	n/a	n/a	n/a	n/a	n/a	n/a
11100905_C06	Extract	2014-11-19	0.847358	0.883045	0.865201	2014-12-04	0.889322	0.904788	0.812283	0.812283	0.841025	0.826654	no	no	n/a	n/a	n/a	n/a	n/a	n/a	n/a	n/a	n/a
11090204_A03	Extract	2014-11-19	0.907764	0.822142	0.864953	2014-12-04	0.880302	0.873453	0.887025	0.887025	0.915402	0.901214	no	no	n/a	n/a	n/a	n/a	n/a	n/a	n/a	n/a	n/a
11090205_H05	Extract	2014-11-19	0.897619	0.831384	0.864502	2014-12-04	0.946019	0.820789	0.884218	0.884218	1.0045	0.944361	no	no	n/a	n/a	n/a	n/a	n/a	n/a	n/a	n/a	n/a
11090201_B09	Extract	2014-11-19	0.954164	0.77427	0.864217	2014-12-04	0.893233	1.4139	0.996047	0.996047	1.04008	1.01806	no	no	n/a	n/a	n/a	n/a	n/a	n/a	n/a	n/a	n/a
11001218_D12	Extract	2014-11-25	0.926749	0.80113	0.86394	2014-12-05	0.938571	0.972755	1.0179	1.0179	1.02209	1.02	no	no	n/a	n/a	n/a	n/a	n/a	n/a	n/a	n/a	n/a
11010216_C12	Extract	2014-11-25	0.907374	0.820061	0.863717	2014-12-05	0.98265	1.04278	0.942261	0.942261	0.890118	0.91619	no	no	n/a	n/a	n/a	n/a	n/a	n/a	n/a	n/a	n/a
11100806_H04	Extract	2014-11-19	0.798945	0.928134	0.863539	2014-11-20	0.932414	0.966659	0.921955	0.921955	0.948569	0.935262	no	no	n/a	n/a	n/a	n/a	n/a	n/a	n/a	n/a	n/a
11090304_B11	Extract	2014-11-19	0.891888	0.834346	0.863117	2014-12-05	1.07476	1.06533	0.970663	0.970663	0.985526	0.978094	no	no	n/a	n/a	n/a	n/a	n/a	n/a	n/a	n/a	n/a
11010416_C10	Extract	2014-11-25	0.911808	0.814313	0.863061	2014-12-05	0.912403	0.925814	0.750265	0.750265	0.721879	0.736072	no	no	n/a	n/a	n/a	n/a	n/a	n/a	n/a	n/a	n/a
11090501_E08	Extract	2014-11-19	0.901867	0.824229	0.863048	2014-12-05	0.87056	1.04949	0.808806	0.808806	0.859231	0.834018	no	no	n/a	n/a	n/a	n/a	n/a	n/a	n/a	n/a	n/a
11010402_G07	Extract	2014-11-25	0.934221	0.790855	0.862538	2014-12-05	0.854332	0.905687	0.814932	0.814932	0.827498	0.821215	no	no	n/a	n/a	n/a	n/a	n/a	n/a	n/a	n/a	n/a
11090201_H06	Extract	2014-11-19	0.813524	0.911352	0.862438	2014-12-04	0.888997	0.912302	0.974742	0.974742	0.95063	0.962686	no	no	n/a	n/a	n/a	n/a	n/a	n/a	n/a	n/a	n/a
11020901_A05	Extract	2014-11-24	0.845221	0.878968	0.862095	2014-12-05	0.622857	0.866315	0.52577	0.52577	0.591569	0.55867	no	no	n/a	n/a	n/a	n/a	n/a	n/a	n/a	n/a	n/a
11040208_B11	Extract	2014-11-19	0.812873	0.911275	0.862074	2014-12-05	0.914393	1.08168	0.777216	0.777216	0.912579	0.844898	no	no	n/a	n/a	n/a	n/a	n/a	n/a	n/a	n/a	n/a
11010341_H11	Extract	2014-11-25	0.915976	0.808158	0.862067	2014-12-05	0.830237	0.810076	0.826173	0.826173	0.788586	0.807379	no	no	n/a	n/a	n/a	n/a	n/a	n/a	n/a	n/a	n/a
11100303_H05	Extract	2014-11-19	0.964976	0.758874	0.861925	2014-12-04	1.01135	0.915442	0.908246	0.908246	1.05034	0.979292	no	no	n/a	n/a	n/a	n/a	n/a	n/a	n/a	n/a	n/a
11020901_G05	Extract	2014-11-24	0.77159	0.952234	0.861912	2014-12-05	0.813756	0.840577	0.483106	0.483106	0.806022	0.644564	no	no	n/a	n/a	n/a	n/a	n/a	n/a	n/a	n/a	n/a
11100305_F04	Extract	2014-11-19	0.969393	0.754301	0.861847	2014-12-04	0.805607	0.885955	0.955147	0.955147	0.930174	0.94266	no	no	n/a	n/a	n/a	n/a	n/a	n/a	n/a	n/a	n/a
11020708_A10	Extract	2014-11-24	0.958983	0.764646	0.861814	2014-12-05	0.856394	1.00686	0.741429	0.741429	0.718628	0.730029	no	no	n/a	n/a	n/a	n/a	n/a	n/a	n/a	n/a	n/a
11010402_H12	Extract	2014-11-25	0.820562	0.903051	0.861806	2014-12-05	0.718324	0.723731	0.673247	0.673247	0.644843	0.659045	no	no	n/a	n/a	n/a	n/a	n/a	n/a	n/a	n/a	n/a
11090501_B08	Extract	2014-11-19	0.942624	0.780403	0.861513	2014-12-05	0.976325	0.997656	0.919429	0.919429	0.90803	0.91373	no	no	n/a	n/a	n/a	n/a	n/a	n/a	n/a	n/a	n/a
11100807_F07	Extract	2014-11-19	0.952449	0.770575	0.861512	2014-12-04	0.933058	0.977751	0.908816	0.908816	0.951022	0.929919	no	no	n/a	n/a	n/a	n/a	n/a	n/a	n/a	n/a	n/a
11010216_D12	Extract	2014-11-25	0.879906	0.843057	0.861482	2014-12-05	1.00378	1.02051	0.81195	0.81195	0.892695	0.852323	no	no	n/a	n/a	n/a	n/a	n/a	n/a	n/a	n/a	n/a
11100906_G09	Extract	2014-11-19	0.874181	0.848645	0.861413	2014-12-04	0.869854	0.893975	0.852218	0.852218	0.799417	0.825817	no	no	n/a	n/a	n/a	n/a	n/a	n/a	n/a	n/a	n/a
11010216_G04	Extract	2014-11-25	0.901988	0.819791	0.86089	2014-12-05	0.973508	1.02747	0.909316	0.909316	0.908866	0.909091	no	no	n/a	n/a	n/a	n/a	n/a	n/a	n/a	n/a	n/a
11040302_D03	Extract	2014-11-19	0.794048	0.927664	0.860856	2014-12-05	0.934952	1.05038	0.843476	0.843476	0.770422	0.806949	no	no	n/a	n/a	n/a	n/a	n/a	n/a	n/a	n/a	n/a
11100905_E12	Extract	2014-11-19	0.85265	0.868545	0.860597	2014-12-04	0.932607	0.967833	0.903525	0.903525	0.925512	0.914519	no	no	n/a	n/a	n/a	n/a	n/a	n/a	n/a	n/a	n/a
11020708_G09	Extract	2014-11-24	0.898613	0.822537	0.860575	2014-12-05	0.981065	1.13597	0.7025	0.7025	0.870904	0.786702	no	no	n/a	n/a	n/a	n/a	n/a	n/a	n/a	n/a	n/a
11090206_F04	Extract	2014-11-19	0.822467	0.898396	0.860431	2014-12-04	0.855656	0.763546	0.974742	0.974742	0.931984	0.953363	no	no	n/a	n/a	n/a	n/a	n/a	n/a	n/a	n/a	n/a
11090206_F07	Extract	2014-11-19	0.793978	0.926734	0.860356	2014-12-04	0.89026	0.947844	0.97599	0.97599	0.925757	0.950873	no	no	n/a	n/a	n/a	n/a	n/a	n/a	n/a	n/a	n/a
11010119_H02	Extract	2014-11-25	0.899817	0.820868	0.860343	2014-12-05	1.18808	0.906467	0.838729	0.838729	1.19687	1.0178	no	no	n/a	n/a	n/a	n/a	n/a	n/a	n/a	n/a	n/a
11010402_A07	Extract	2014-11-25	0.858696	0.861828	0.860262	2014-12-05	0.875073	0.826549	0.772534	0.772534	0.725905	0.749219	no	no	n/a	n/a	n/a	n/a	n/a	n/a	n/a	n/a	n/a
11010119_C08	Extract	2014-11-25	0.923238	0.797091	0.860165	2014-12-05	0.905966	0.992462	0.9269	0.9269	1.06252	0.994709	no	no	n/a	n/a	n/a	n/a	n/a	n/a	n/a	n/a	n/a
11020711_F08	Extract	2014-11-24	0.875948	0.843941	0.859944	2014-12-05	0.797819	1.03897	0.785133	0.785133	0.827054	0.806093	no	no	n/a	n/a	n/a	n/a	n/a	n/a	n/a	n/a	n/a
11100302_B03	Extract	2014-11-19	1.01468	0.705108	0.859897	2014-11-21	0.63426	0.946926	0.567964	0.567964	0.846461	0.707212	no	no	n/a	n/a	n/a	n/a	n/a	n/a	n/a	n/a	n/a
11010402_D12	Extract	2014-11-25	0.838789	0.880492	0.85964	2014-12-05	0.826599	0.736369	0.8179	0.8179	0.785946	0.801923	no	no	n/a	n/a	n/a	n/a	n/a	n/a	n/a	n/a	n/a
11020709_B08	Extract	2014-11-24	0.948734	0.770529	0.859631	2014-12-05	0.789948	1.18836	0.789388	0.789388	0.885274	0.837331	no	no	n/a	n/a	n/a	n/a	n/a	n/a	n/a	n/a	n/a
11100701_G11	Extract	2014-11-19	0.823602	0.895625	0.859614	2014-12-04	0.820161	0.909693	0.792423	0.792423	0.887987	0.840205	no	no	n/a	n/a	n/a	n/a	n/a	n/a	n/a	n/a	n/a
11010416_C12	Extract	2014-11-25	0.884991	0.834176	0.859583	2014-12-05	0.825309	0.835814	0.860058	0.860058	0.609359	0.734708	no	no	n/a	n/a	n/a	n/a	n/a	n/a	n/a	n/a	n/a
11010216_H11	Extract	2014-11-25	0.878004	0.840633	0.859319	2014-12-05	0.859297	0.775803	0.775699	0.775699	0.897559	0.836629	no	no	n/a	n/a	n/a	n/a	n/a	n/a	n/a	n/a	n/a
11100903_E02	Extract	2014-11-19	0.956105	0.762357	0.859231	2014-12-04	0.989277	1.00184	0.947435	0.947435	0.77179	0.859612	no	no	n/a	n/a	n/a	n/a	n/a	n/a	n/a	n/a	n/a
11090205_E11	Extract	2014-11-19	0.971834	0.746391	0.859112	2014-12-04	0.944285	1.03483	0.900189	0.900189	0.943371	0.92178	no	no	n/a	n/a	n/a	n/a	n/a	n/a	n/a	n/a	n/a
11020711_A07	Extract	2014-11-24	0.878981	0.838267	0.858624	2014-12-05	0.443525	0.832119	0.380973	0.380973	0.463847	0.42241	no	no	n/a	n/a	n/a	n/a	n/a	n/a	n/a	n/a	n/a
11010402_G10	Extract	2014-11-25	0.849582	0.86725	0.858416	2014-12-05	0.843445	0.809143	0.77764	0.77764	0.707444	0.742542	no	no	n/a	n/a	n/a	n/a	n/a	n/a	n/a	n/a	n/a
11100806_C03	Extract	2014-11-19	0.94201	0.774625	0.858317	2014-11-20	1.03075	1.16264	0.671611	0.671611	0.931641	0.801626	no	no	n/a	n/a	n/a	n/a	n/a	n/a	n/a	n/a	n/a
11100804_C03	Extract	2014-11-19	0.920482	0.796143	0.858313	2014-11-20	0.963182	1.03546	0.703356	0.703356	0.659746	0.681551	no	no	n/a	n/a	n/a	n/a	n/a	n/a	n/a	n/a	n/a
11100206_E10	Extract	2014-11-19	0.895355	0.821193	0.858274	2014-11-21	0.89	0.995965	0.768147	0.768147	0.989678	0.878913	no	no	n/a	n/a	n/a	n/a	n/a	n/a	n/a	n/a	n/a
11090205_D06	Extract	2014-11-19	0.872472	0.843685	0.858079	2014-12-04	0.854912	0.867831	0.87826	0.87826	0.927133	0.902697	no	no	n/a	n/a	n/a	n/a	n/a	n/a	n/a	n/a	n/a
11010402_E08	Extract	2014-11-25	0.90878	0.806793	0.857786	2014-12-05	1.01431	0.822928	0.781917	0.781917	0.665605	0.723761	no	no	n/a	n/a	n/a	n/a	n/a	n/a	n/a	n/a	n/a
11010216_G11	Extract	2014-11-25	0.917048	0.798168	0.857608	2014-12-05	0.925183	0.96047	0.781838	0.781838	0.792483	0.787161	no	no	n/a	n/a	n/a	n/a	n/a	n/a	n/a	n/a	n/a
11090304_G02	Extract	2014-11-19	0.908278	0.806803	0.857541	2014-12-05	0.947562	0.942956	0.830751	0.830751	1.02168	0.926216	no	no	n/a	n/a	n/a	n/a	n/a	n/a	n/a	n/a	n/a
11020711_G09	Extract	2014-11-24	0.90973	0.805347	0.857538	2014-12-05	1.03642	1.08669	0.978291	0.978291	0.958374	0.968333	no	no	n/a	n/a	n/a	n/a	n/a	n/a	n/a	n/a	n/a
11100906_F11	Extract	2014-11-19	0.832532	0.882399	0.857466	2014-12-04	0.904509	0.915355	0.867802	0.867802	0.859272	0.863537	no	no	n/a	n/a	n/a	n/a	n/a	n/a	n/a	n/a	n/a
11020709_G06	Extract	2014-11-24	0.854799	0.859671	0.857235	2014-12-05	1.11459	1.0869	0.816002	0.816002	0.886295	0.851149	no	no	n/a	n/a	n/a	n/a	n/a	n/a	n/a	n/a	n/a
11010119_B09	Extract	2014-11-25	0.828749	0.885522	0.857136	2014-12-05	0.841245	0.987368	0.859091	0.859091	0.968716	0.913904	no	no	n/a	n/a	n/a	n/a	n/a	n/a	n/a	n/a	n/a
11020711_G06	Extract	2014-11-24	0.792934	0.920942	0.856938	2014-12-05	1.08919	1.06437	1.04797	1.04797	1.1011	1.07454	no	no	n/a	n/a	n/a	n/a	n/a	n/a	n/a	n/a	n/a
11010402_C12	Extract	2014-11-25	0.803133	0.910571	0.856852	2014-12-05	0.955177	0.788116	0.85415	0.85415	0.667905	0.761027	no	no	n/a	n/a	n/a	n/a	n/a	n/a	n/a	n/a	n/a
11010216_A11	Extract	2014-11-25	0.901157	0.812494	0.856825	2014-12-05	1.10822	0.875166	0.821729	0.821729	0.82447	0.823099	no	no	n/a	n/a	n/a	n/a	n/a	n/a	n/a	n/a	n/a
11040303_H07	Extract	2014-11-19	0.811295	0.902011	0.856653	2014-12-05	1.02228	0.972017	0.7871	0.7871	0.816801	0.801951	no	no	n/a	n/a	n/a	n/a	n/a	n/a	n/a	n/a	n/a
11040209_B03	Extract	2014-11-19	0.88385	0.829208	0.856529	2014-12-05	0.923829	1.04092	0.865463	0.865463	0.852854	0.859158	no	no	n/a	n/a	n/a	n/a	n/a	n/a	n/a	n/a	n/a
11100302_F05	Extract	2014-11-19	0.923864	0.788803	0.856334	2014-11-21	0.940408	1.15746	1.14843	1.14843	1.20363	1.17603	no	no	n/a	n/a	n/a	n/a	n/a	n/a	n/a	n/a	n/a
11090201_A09	Extract	2014-11-19	0.923968	0.788538	0.856253	2014-12-04	1.01776	1.07014	1.02958	1.02958	1.00416	1.01687	no	no	n/a	n/a	n/a	n/a	n/a	n/a	n/a	n/a	n/a
11040208_F03	Extract	2014-11-19	0.789741	0.922661	0.856201	2014-12-05	0.882434	0.962322	0.779133	0.779133	0.777699	0.778416	no	no	n/a	n/a	n/a	n/a	n/a	n/a	n/a	n/a	n/a
11010216_A03	Extract	2014-11-25	0.899281	0.813032	0.856157	2014-12-05	1.09579	0.938205	0.885315	0.885315	0.795382	0.840349	no	no	n/a	n/a	n/a	n/a	n/a	n/a	n/a	n/a	n/a
11040209_G07	Extract	2014-11-19	0.768187	0.943681	0.855934	2014-12-05	0.865472	0.996762	0.844845	0.844845	0.901981	0.873413	no	no	n/a	n/a	n/a	n/a	n/a	n/a	n/a	n/a	n/a
11090204_F10	Extract	2014-11-19	0.764985	0.946748	0.855866	2014-12-04	0.860882	0.858366	0.86416	0.86416	0.89538	0.87977	no	no	n/a	n/a	n/a	n/a	n/a	n/a	n/a	n/a	n/a
11090304_E09	Extract	2014-11-19	0.941522	0.768481	0.855002	2014-12-05	1.05479	1.06989	0.751967	0.751967	0.825703	0.788835	no	no	n/a	n/a	n/a	n/a	n/a	n/a	n/a	n/a	n/a
11090501_G05	Extract	2014-11-19	0.92956	0.780174	0.854867	2014-12-05	1.00388	0.938138	0.851575	0.851575	0.913251	0.882413	no	no	n/a	n/a	n/a	n/a	n/a	n/a	n/a	n/a	n/a
11040209_G03	Extract	2014-11-19	0.795431	0.913768	0.8546	2014-12-05	0.940514	0.994809	0.844845	0.844845	0.826192	0.835519	no	no	n/a	n/a	n/a	n/a	n/a	n/a	n/a	n/a	n/a
11100804_H07	Extract	2014-11-19	0.920482	0.788504	0.854493	2014-11-20	0.939941	0.968858	0.964899	0.964899	0.901825	0.933362	no	no	n/a	n/a	n/a	n/a	n/a	n/a	n/a	n/a	n/a
11090206_F09	Extract	2014-11-19	0.817394	0.890027	0.853711	2014-12-04	0.911662	0.917416	0.944016	0.944016	0.985514	0.964765	no	no	n/a	n/a	n/a	n/a	n/a	n/a	n/a	n/a	n/a
11100804_A06	Extract	2014-11-19	0.909608	0.797563	0.853585	2014-11-20	1.14863	1.17296	0.95199	0.95199	1.03866	0.995325	no	no	n/a	n/a	n/a	n/a	n/a	n/a	n/a	n/a	n/a
11010119_E12	Extract	2014-11-25	0.850831	0.856305	0.853568	2014-12-05	0.950045	0.970197	0.970457	0.970457	0.964174	0.967316	no	no	n/a	n/a	n/a	n/a	n/a	n/a	n/a	n/a	n/a
11090301_A08	Extract	2014-11-19	0.856	0.851087	0.853543	2014-12-05	0.839457	0.937184	0.992075	0.992075	0.939937	0.966006	no	no	n/a	n/a	n/a	n/a	n/a	n/a	n/a	n/a	n/a
11090205_D04	Extract	2014-11-19	0.865476	0.84126	0.853368	2014-12-04	0.930587	0.820789	0.846317	0.846317	0.886745	0.866531	no	no	n/a	n/a	n/a	n/a	n/a	n/a	n/a	n/a	n/a
11010416_B06	Extract	2014-11-25	0.878355	0.827555	0.852955	2014-12-05	0.956208	0.907936	0.765824	0.765824	0.729959	0.747892	no	no	n/a	n/a	n/a	n/a	n/a	n/a	n/a	n/a	n/a
11040303_B09	Extract	2014-11-19	0.798374	0.907174	0.852774	2014-12-05	1.0106	0.985837	0.775573	0.775573	0.980216	0.877895	no	no	n/a	n/a	n/a	n/a	n/a	n/a	n/a	n/a	n/a
11020709_E09	Extract	2014-11-24	0.977965	0.727115	0.85254	2014-12-05	0.869722	1.15869	0.966638	0.966638	0.848596	0.907617	no	no	n/a	n/a	n/a	n/a	n/a	n/a	n/a	n/a	n/a
11020711_A12	Extract	2014-11-24	0.902969	0.80178	0.852374	2014-12-05	0.851132	1.07611	0.845926	0.845926	0.951202	0.898564	no	no	n/a	n/a	n/a	n/a	n/a	n/a	n/a	n/a	n/a
11010402_B03	Extract	2014-11-25	0.906825	0.797776	0.8523	2014-12-05	1.01069	0.852546	0.704364	0.704364	0.832415	0.76839	no	no	n/a	n/a	n/a	n/a	n/a	n/a	n/a	n/a	n/a
11100206_B07	Extract	2014-11-19	0.949496	0.754928	0.852212	2014-11-21	0.857089	1.09319	0.924204	0.924204	1.16205	1.04313	no	no	n/a	n/a	n/a	n/a	n/a	n/a	n/a	n/a	n/a
11040303_G10	Extract	2014-11-19	0.832284	0.872098	0.852191	2014-12-05	0.822943	1.02151	0.714817	0.714817	0.791649	0.753233	no	no	n/a	n/a	n/a	n/a	n/a	n/a	n/a	n/a	n/a
11010402_E04	Extract	2014-11-25	0.927585	0.776115	0.85185	2014-12-05	0.930023	0.870402	0.776276	0.776276	0.745516	0.760896	no	no	n/a	n/a	n/a	n/a	n/a	n/a	n/a	n/a	n/a
11090501_F08	Extract	2014-11-19	0.892548	0.810937	0.851743	2014-12-05	0.812135	0.877952	0.760684	0.760684	0.705017	0.73285	no	no	n/a	n/a	n/a	n/a	n/a	n/a	n/a	n/a	n/a
11020709_D07	Extract	2014-11-24	0.903186	0.799672	0.851429	2014-12-05	0.821845	1.0636	0.879656	0.879656	0.8768	0.878228	no	no	n/a	n/a	n/a	n/a	n/a	n/a	n/a	n/a	n/a
11010216_E05	Extract	2014-11-25	0.87452	0.827924	0.851222	2014-12-05	1.00285	1.09777	0.844869	0.844869	0.86554	0.855204	no	no	n/a	n/a	n/a	n/a	n/a	n/a	n/a	n/a	n/a
11010535_E11	Extract	2014-11-25	0.786833	0.915394	0.851113	2014-12-05	0.825567	0.999779	0.836693	0.836693	0.839345	0.838019	no	no	n/a	n/a	n/a	n/a	n/a	n/a	n/a	n/a	n/a
11090302_B05	Extract	2014-11-19	0.895875	0.806347	0.851111	2014-12-05	1.04123	1.00221	0.75732	0.75732	0.974145	0.865733	no	no	n/a	n/a	n/a	n/a	n/a	n/a	n/a	n/a	n/a
11020711_F11	Extract	2014-11-24	0.89883	0.80324	0.851035	2014-12-05	0.879354	1.12211	0.730273	0.730273	0.855258	0.792765	no	no	n/a	n/a	n/a	n/a	n/a	n/a	n/a	n/a	n/a
11090201_F10	Extract	2014-11-19	0.882882	0.819083	0.850983	2014-12-04	0.951518	0.843534	0.912386	0.912386	0.942339	0.927362	no	no	n/a	n/a	n/a	n/a	n/a	n/a	n/a	n/a	n/a
11020709_A08	Extract	2014-11-24	0.83846	0.862612	0.850536	2014-12-05	0.900553	1.13868	0.889867	0.889867	1.00483	0.947347	no	no	n/a	n/a	n/a	n/a	n/a	n/a	n/a	n/a	n/a
11100807_A04	Extract	2014-11-19	0.898379	0.802371	0.850375	2014-12-04	0.987475	0.860885	0.950883	0.950883	0.672506	0.811695	no	no	n/a	n/a	n/a	n/a	n/a	n/a	n/a	n/a	n/a
11100804_E07	Extract	2014-11-19	0.926923	0.773025	0.849974	2014-11-20	1.05555	1.04861	0.825208	0.825208	0.910733	0.867971	no	no	n/a	n/a	n/a	n/a	n/a	n/a	n/a	n/a	n/a
11100905_H04	Extract	2014-11-19	0.852448	0.847354	0.849901	2014-12-04	0.883666	0.8404	0.816258	0.816258	0.789401	0.802829	no	no	n/a	n/a	n/a	n/a	n/a	n/a	n/a	n/a	n/a
11020711_D12	Extract	2014-11-24	0.902969	0.796731	0.84985	2014-12-05	0.554977	0.499802	0.652202	0.652202	0.683022	0.667612	no	no	n/a	n/a	n/a	n/a	n/a	n/a	n/a	n/a	n/a
11010119_B12	Extract	2014-11-25	0.824998	0.874428	0.849713	2014-12-05	0.89729	0.894182	0.846535	0.846535	0.882677	0.864606	no	no	n/a	n/a	n/a	n/a	n/a	n/a	n/a	n/a	n/a
11090302_E11	Extract	2014-11-19	0.844478	0.854535	0.849506	2014-12-05	0.913812	0.946058	0.753088	0.753088	0.889808	0.821448	no	no	n/a	n/a	n/a	n/a	n/a	n/a	n/a	n/a	n/a
11010119_G12	Extract	2014-11-25	0.809375	0.889588	0.849481	2014-12-05	0.873361	0.98156	0.897871	0.897871	0.884932	0.891401	no	no	n/a	n/a	n/a	n/a	n/a	n/a	n/a	n/a	n/a
11100804_B02	Extract	2014-11-19	0.875463	0.823101	0.849282	2014-11-20	1.02743	1.00851	0.849259	0.849259	0.839438	0.844349	no	no	n/a	n/a	n/a	n/a	n/a	n/a	n/a	n/a	n/a
11090206_D04	Extract	2014-11-19	0.902932	0.795573	0.849253	2014-12-04	1.0048	0.677478	0.808105	0.808105	0.823239	0.815672	no	no	n/a	n/a	n/a	n/a	n/a	n/a	n/a	n/a	n/a
11100303_F07	Extract	2014-11-19	1.09747	0.601011	0.849242	2014-12-04	0.947347	0.871569	0.810326	0.810326	0.948611	0.879469	no	no	n/a	n/a	n/a	n/a	n/a	n/a	n/a	n/a	n/a
11100305_G09	Extract	2014-11-19	0.867331	0.830673	0.849002	2014-12-04	0.947597	1.09855	1.1299	1.1299	1.04419	1.08705	no	no	n/a	n/a	n/a	n/a	n/a	n/a	n/a	n/a	n/a
11100701_F11	Extract	2014-11-19	0.891075	0.806877	0.848976	2014-12-04	1.06283	0.89817	1.02248	1.02248	1.05034	1.03641	no	no	n/a	n/a	n/a	n/a	n/a	n/a	n/a	n/a	n/a
11010216_B06	Extract	2014-11-25	0.916244	0.781123	0.848684	2014-12-05	1.05001	1.02865	0.905149	0.905149	0.816707	0.860928	no	no	n/a	n/a	n/a	n/a	n/a	n/a	n/a	n/a	n/a
11040303_E07	Extract	2014-11-19	0.783661	0.913238	0.848449	2014-12-05	1.01199	1.13508	0.622518	0.622518	0.769818	0.696168	no	no	n/a	n/a	n/a	n/a	n/a	n/a	n/a	n/a	n/a
11100906_F07	Extract	2014-11-19	0.887391	0.809276	0.848334	2014-12-04	0.929205	0.889251	0.860931	0.860931	0.912742	0.886837	no	no	n/a	n/a	n/a	n/a	n/a	n/a	n/a	n/a	n/a
11010119_G05	Extract	2014-11-25	0.919755	0.776545	0.84815	2014-12-05	1.06878	1.00938	0.905982	0.905982	0.946715	0.926349	no	no	n/a	n/a	n/a	n/a	n/a	n/a	n/a	n/a	n/a
11090501_A11	Extract	2014-11-19	0.868403	0.827678	0.84804	2014-12-05	0.942079	0.967169	0.930696	0.930696	0.902194	0.916445	no	no	n/a	n/a	n/a	n/a	n/a	n/a	n/a	n/a	n/a
11100102_B06	Extract	2014-11-19	0.964519	0.73097	0.847745	2014-11-21	0.893747	1.0428	0.698695	0.698695	0.910539	0.804617	no	no	n/a	n/a	n/a	n/a	n/a	n/a	n/a	n/a	n/a
11010119_B03	Extract	2014-11-25	0.901988	0.793294	0.847641	2014-12-05	0.942325	1.02911	0.928872	0.928872	0.921815	0.925344	no	no	n/a	n/a	n/a	n/a	n/a	n/a	n/a	n/a	n/a
11100806_F08	Extract	2014-11-19	0.997485	0.69743	0.847458	2014-11-20	1.11518	1.05893	0.949995	0.949995	0.97162	0.960808	no	no	n/a	n/a	n/a	n/a	n/a	n/a	n/a	n/a	n/a
11010216_D05	Extract	2014-11-25	0.86699	0.827089	0.847039	2014-12-05	0.953567	1.04255	0.941706	0.941706	0.913408	0.927557	no	no	n/a	n/a	n/a	n/a	n/a	n/a	n/a	n/a	n/a
11090304_A12	Extract	2014-11-19	0.817248	0.876346	0.846797	2014-12-05	0.834706	0.87435	0.823436	0.823436	0.844575	0.834005	no	no	n/a	n/a	n/a	n/a	n/a	n/a	n/a	n/a	n/a
11090204_F11	Extract	2014-11-19	0.776332	0.916181	0.846257	2014-12-04	0.761353	0.79601	0.821581	0.821581	0.902639	0.86211	no	no	n/a	n/a	n/a	n/a	n/a	n/a	n/a	n/a	n/a
11100304_D10	Extract	2014-11-19	0.830184	0.862228	0.846206	2014-12-04	0.188296	0.669047	0.322346	0.322346	0.388305	0.355325	no	no	n/a	n/a	n/a	n/a	n/a	n/a	n/a	n/a	n/a
11010402_H02	Extract	2014-11-25	0.868388	0.82393	0.846159	2014-12-05	0.915499	0.877868	1.02473	1.02473	0.825198	0.924966	no	no	n/a	n/a	n/a	n/a	n/a	n/a	n/a	n/a	n/a
11001218_F03	Extract	2014-11-25	0.924605	0.767605	0.846105	2014-12-05	0.956156	0.95351	0.933039	0.933039	0.842895	0.887967	no	no	n/a	n/a	n/a	n/a	n/a	n/a	n/a	n/a	n/a
11020708_F09	Extract	2014-11-24	0.89402	0.797357	0.845688	2014-12-05	0.70474	1.10903	0.646505	0.646505	0.754514	0.70051	no	no	n/a	n/a	n/a	n/a	n/a	n/a	n/a	n/a	n/a
11090302_D06	Extract	2014-11-19	0.934649	0.756537	0.845593	2014-12-05	0.779354	0.917289	0.670689	0.670689	0.853362	0.762025	no	no	n/a	n/a	n/a	n/a	n/a	n/a	n/a	n/a	n/a
11090205_C05	Extract	2014-11-19	0.868626	0.82236	0.845493	2014-12-04	0.909185	0.864752	0.833777	0.833777	0.936456	0.885117	no	no	n/a	n/a	n/a	n/a	n/a	n/a	n/a	n/a	n/a
11100303_C09	Extract	2014-11-19	0.927807	0.762992	0.8454	2014-12-04	0.862548	0.858854	0.895011	0.895011	0.881285	0.888148	no	no	n/a	n/a	n/a	n/a	n/a	n/a	n/a	n/a	n/a
11020709_H05	Extract	2014-11-24	0.860021	0.830715	0.845368	2014-12-05	0.875636	1.09517	0.988029	0.988029	1.03921	1.01362	no	no	n/a	n/a	n/a	n/a	n/a	n/a	n/a	n/a	n/a
11040303_H04	Extract	2014-11-19	0.80424	0.885994	0.845117	2014-12-05	0.988079	1.01203	0.863546	0.863546	0.982329	0.922938	no	no	n/a	n/a	n/a	n/a	n/a	n/a	n/a	n/a	n/a
11010402_A08	Extract	2014-11-25	0.814477	0.875669	0.845073	2014-12-05	0.860033	0.906361	0.788894	0.788894	0.802107	0.795501	no	no	n/a	n/a	n/a	n/a	n/a	n/a	n/a	n/a	n/a
11040302_G10	Extract	2014-11-19	0.748192	0.941719	0.844955	2014-12-05	0.836003	0.951638	0.810209	0.810209	0.869823	0.840016	no	no	n/a	n/a	n/a	n/a	n/a	n/a	n/a	n/a	n/a
11100303_F12	Extract	2014-11-19	0.867112	0.822438	0.844775	2014-12-04	0.851514	0.781175	0.897757	0.897757	0.887709	0.892733	no	no	n/a	n/a	n/a	n/a	n/a	n/a	n/a	n/a	n/a
11100806_C08	Extract	2014-11-19	0.902726	0.786284	0.844505	2014-11-20	1.00238	1.06725	0.712219	0.712219	0.642543	0.677381	no	no	n/a	n/a	n/a	n/a	n/a	n/a	n/a	n/a	n/a
11090206_G06	Extract	2014-11-19	0.902211	0.78679	0.8445	2014-12-04	0.898707	0.910267	0.964697	0.964697	0.8681	0.916399	no	no	n/a	n/a	n/a	n/a	n/a	n/a	n/a	n/a	n/a
11040208_H03	Extract	2014-11-19	0.787597	0.900402	0.844	2014-12-05	0.869346	0.992638	0.901769	0.901769	0.837092	0.869431	no	no	n/a	n/a	n/a	n/a	n/a	n/a	n/a	n/a	n/a
11010402_G08	Extract	2014-11-25	0.884991	0.802599	0.843795	2014-12-05	0.918879	0.883288	0.837228	0.837228	0.726192	0.78171	no	no	n/a	n/a	n/a	n/a	n/a	n/a	n/a	n/a	n/a
11100304_E09	Extract	2014-11-19	0.83261	0.854902	0.843756	2014-12-04	0.85476	0.884261	0.976675	0.976675	0.965102	0.970889	no	no	n/a	n/a	n/a	n/a	n/a	n/a	n/a	n/a	n/a
11010402_G03	Extract	2014-11-25	0.810044	0.877167	0.843605	2014-12-05	0.844735	0.912006	0.798839	0.798839	0.651457	0.725148	no	no	n/a	n/a	n/a	n/a	n/a	n/a	n/a	n/a	n/a
11090302_H12	Extract	2014-11-19	0.79731	0.889432	0.843371	2014-12-05	0.811663	0.914641	0.834955	0.834955	0.935397	0.885176	no	no	n/a	n/a	n/a	n/a	n/a	n/a	n/a	n/a	n/a
11010402_E12	Extract	2014-11-25	0.795671	0.890109	0.84289	2014-12-05	0.860549	0.832643	0.80071	0.80071	0.804695	0.802703	no	no	n/a	n/a	n/a	n/a	n/a	n/a	n/a	n/a	n/a
11100905_G08	Extract	2014-11-19	0.833542	0.851679	0.84261	2014-12-04	0.857393	0.838363	0.850612	0.850612	0.923061	0.886836	no	no	n/a	n/a	n/a	n/a	n/a	n/a	n/a	n/a	n/a
11090302_C12	Extract	2014-11-19	0.781823	0.903226	0.842524	2014-12-05	0.82686	1.06221	0.808246	0.808246	0.789582	0.798914	no	no	n/a	n/a	n/a	n/a	n/a	n/a	n/a	n/a	n/a
11040208_H07	Extract	2014-11-19	0.826788	0.858043	0.842416	2014-12-05	0.889103	0.919392	0.808265	0.808265	0.806475	0.80737	no	no	n/a	n/a	n/a	n/a	n/a	n/a	n/a	n/a	n/a
11090201_E07	Extract	2014-11-19	0.820063	0.864551	0.842307	2014-12-04	0.863359	0.881365	0.863224	0.863224	0.927133	0.895179	no	no	n/a	n/a	n/a	n/a	n/a	n/a	n/a	n/a	n/a
11100807_H04	Extract	2014-11-19	0.804901	0.879581	0.842241	2014-12-04	0.726726	0.869214	0.866486	0.866486	0.832522	0.849504	no	no	n/a	n/a	n/a	n/a	n/a	n/a	n/a	n/a	n/a
11090206_F12	Extract	2014-11-19	0.913077	0.770097	0.841587	2014-12-04	0.769552	0.868339	0.873861	0.873861	1.00416	0.93901	no	no	n/a	n/a	n/a	n/a	n/a	n/a	n/a	n/a	n/a
11010402_B08	Extract	2014-11-25	0.832429	0.850713	0.841571	2014-12-05	0.896589	0.946391	0.742994	0.742994	0.587447	0.66522	no	no	n/a	n/a	n/a	n/a	n/a	n/a	n/a	n/a	n/a
11010402_A02	Extract	2014-11-25	0.867286	0.815811	0.841549	2014-12-05	0.97308	0.702501	0.8179	0.8179	0.934641	0.876271	no	no	n/a	n/a	n/a	n/a	n/a	n/a	n/a	n/a	n/a
11020708_E02	Extract	2014-11-24	0.784223	0.898495	0.841359	2014-12-05	0.897052	0.975891	1.01443	1.01443	1.03742	1.02593	no	no	n/a	n/a	n/a	n/a	n/a	n/a	n/a	n/a	n/a
11010402_G12	Extract	2014-11-25	0.880833	0.8017	0.841267	2014-12-05	0.789552	0.811167	0.769299	0.769299	0.735423	0.752361	no	no	n/a	n/a	n/a	n/a	n/a	n/a	n/a	n/a	n/a
11090302_H02	Extract	2014-11-19	0.888341	0.794174	0.841257	2014-12-05	1.03648	1.05068	0.81472	0.81472	0.937343	0.876031	no	no	n/a	n/a	n/a	n/a	n/a	n/a	n/a	n/a	n/a
11020708_C11	Extract	2014-11-24	0.844571	0.837849	0.84121	2014-12-05	0.822062	0.997428	0.639154	0.639154	0.664057	0.651606	no	no	n/a	n/a	n/a	n/a	n/a	n/a	n/a	n/a	n/a
11020711_F02	Extract	2014-11-24	0.839327	0.842877	0.841102	2014-12-05	0.786448	0.961456	0.794139	0.794139	0.873456	0.833797	no	no	n/a	n/a	n/a	n/a	n/a	n/a	n/a	n/a	n/a
11100903_E05	Extract	2014-11-19	0.870727	0.811019	0.840873	2014-12-04	0.968885	1.0095	0.873093	0.873093	0.778477	0.825785	no	no	n/a	n/a	n/a	n/a	n/a	n/a	n/a	n/a	n/a
11020901_G06	Extract	2014-11-24	0.828883	0.852745	0.840814	2014-12-05	1.03007	0.908606	0.800568	0.800568	0.847575	0.824071	no	no	n/a	n/a	n/a	n/a	n/a	n/a	n/a	n/a	n/a
11090301_G03	Extract	2014-11-19	0.833418	0.847889	0.840654	2014-12-05	0.924022	0.986372	0.872119	0.872119	0.865067	0.868593	no	no	n/a	n/a	n/a	n/a	n/a	n/a	n/a	n/a	n/a
11010119_G06	Extract	2014-11-25	0.900621	0.780584	0.840603	2014-12-05	0.963199	0.917346	1.00199	1.00199	0.993294	0.99764	no	no	n/a	n/a	n/a	n/a	n/a	n/a	n/a	n/a	n/a
11010535_C04	Extract	2014-11-25	0.917067	0.763503	0.840285	2014-12-05	1.05945	0.93328	0.773068	0.773068	0.690708	0.731888	no	no	n/a	n/a	n/a	n/a	n/a	n/a	n/a	n/a	n/a
11040208_B06	Extract	2014-11-19	0.880322	0.800197	0.840259	2014-12-05	0.944139	1.02127	0.666737	0.666737	0.848929	0.757833	no	no	n/a	n/a	n/a	n/a	n/a	n/a	n/a	n/a	n/a
11090501_C06	Extract	2014-11-19	0.857321	0.82263	0.839976	2014-12-05	0.910243	1.067	0.807685	0.807685	0.885917	0.846801	no	no	n/a	n/a	n/a	n/a	n/a	n/a	n/a	n/a	n/a
11090302_G12	Extract	2014-11-19	0.832956	0.846976	0.839966	2014-12-05	0.904547	0.848229	0.933218	0.933218	0.878102	0.90566	no	no	n/a	n/a	n/a	n/a	n/a	n/a	n/a	n/a	n/a
11010402_A10	Extract	2014-11-25	0.877777	0.802	0.839888	2014-12-05	0.864444	0.790837	0.786756	0.786756	0.824048	0.805402	no	no	n/a	n/a	n/a	n/a	n/a	n/a	n/a	n/a	n/a
11090205_G02	Extract	2014-11-19	0.885046	0.794262	0.839654	2014-12-04	0.743692	0.823105	0.948414	0.948414	0.905047	0.926731	no	no	n/a	n/a	n/a	n/a	n/a	n/a	n/a	n/a	n/a
11100303_H02	Extract	2014-11-19	0.904281	0.77464	0.839461	2014-12-04	0.879847	0.843991	1.00787	1.00787	0.836316	0.922093	no	no	n/a	n/a	n/a	n/a	n/a	n/a	n/a	n/a	n/a
11100906_D08	Extract	2014-11-19	0.824211	0.854497	0.839354	2014-12-04	0.838804	0.878885	0.804885	0.804885	0.838605	0.821745	no	no	n/a	n/a	n/a	n/a	n/a	n/a	n/a	n/a	n/a
11090201_E12	Extract	2014-11-19	0.908966	0.769442	0.839204	2014-12-04	0.864375	0.875997	0.837552	0.837552	0.864315	0.850934	no	no	n/a	n/a	n/a	n/a	n/a	n/a	n/a	n/a	n/a
11100102_C09	Extract	2014-11-19	1.07528	0.60298	0.839131	2014-11-21	0.825419	1.36765	0.997677	0.997677	1.08338	1.04053	no	no	n/a	n/a	n/a	n/a	n/a	n/a	n/a	n/a	n/a
11040302_A02	Extract	2014-11-19	0.872468	0.805713	0.839091	2014-12-05	0.972224	0.9725	0.859686	0.859686	0.831325	0.845505	no	no	n/a	n/a	n/a	n/a	n/a	n/a	n/a	n/a	n/a
11100805_B02	Extract	2014-11-19	0.876565	0.801583	0.839074	2014-11-20	1.19943	1.09334	0.902776	0.902776	0.967304	0.93504	no	no	n/a	n/a	n/a	n/a	n/a	n/a	n/a	n/a	n/a
11040303_A07	Extract	2014-11-19	0.836006	0.841672	0.838839	2014-12-05	0.956923	1.04577	0.911954	0.911954	0.868012	0.889983	no	no	n/a	n/a	n/a	n/a	n/a	n/a	n/a	n/a	n/a
11010119_H11	Extract	2014-11-25	0.854314	0.82305	0.838682	2014-12-05	0.863518	0.814018	0.794116	0.794116	0.818994	0.806555	no	no	n/a	n/a	n/a	n/a	n/a	n/a	n/a	n/a	n/a
11100805_B11	Extract	2014-11-19	0.867015	0.810222	0.838618	2014-11-20	1.18567	1.18744	0.957433	0.957433	0.948569	0.953001	no	no	n/a	n/a	n/a	n/a	n/a	n/a	n/a	n/a	n/a
11020901_A08	Extract	2014-11-24	0.835188	0.841834	0.838511	2014-12-05	0.787318	1.04783	0.840939	0.840939	0.897831	0.869385	no	no	n/a	n/a	n/a	n/a	n/a	n/a	n/a	n/a	n/a
11020901_B11	Extract	2014-11-24	0.834322	0.842669	0.838495	2014-12-05	0.682454	0.997619	0.742138	0.742138	0.726055	0.734097	no	no	n/a	n/a	n/a	n/a	n/a	n/a	n/a	n/a	n/a
11090501_B04	Extract	2014-11-19	0.907177	0.769395	0.838286	2014-12-05	1.02007	1.15655	0.891542	0.891542	1.06468	0.978109	no	no	n/a	n/a	n/a	n/a	n/a	n/a	n/a	n/a	n/a
11020711_E12	Extract	2014-11-24	0.843032	0.83303	0.838031	2014-12-05	0.880223	1.09574	1.00446	1.00446	1.13293	1.06869	no	no	n/a	n/a	n/a	n/a	n/a	n/a	n/a	n/a	n/a
11090201_C11	Extract	2014-11-19	0.848311	0.827429	0.83787	2014-12-04	0.940793	0.913345	0.946855	0.946855	0.937488	0.942172	no	no	n/a	n/a	n/a	n/a	n/a	n/a	n/a	n/a	n/a
11100701_E09	Extract	2014-11-19	1.07723	0.598054	0.83764	2014-12-04	0.909953	0.925295	1.0512	1.0512	0.903059	0.97713	no	no	n/a	n/a	n/a	n/a	n/a	n/a	n/a	n/a	n/a
11090204_A07	Extract	2014-11-19	0.923728	0.751438	0.837583	2014-12-04	1.02425	1.03149	1.03457	1.03457	1.085	1.05979	no	no	n/a	n/a	n/a	n/a	n/a	n/a	n/a	n/a	n/a
11100807_B03	Extract	2014-11-19	0.912194	0.762787	0.837491	2014-12-04	1.00334	1.06426	0.900866	0.900866	0.749609	0.825237	no	no	n/a	n/a	n/a	n/a	n/a	n/a	n/a	n/a	n/a
11090205_B12	Extract	2014-11-19	0.846628	0.827866	0.837247	2014-12-04	0.985132	1.07296	0.925861	0.925861	0.794927	0.860394	no	no	n/a	n/a	n/a	n/a	n/a	n/a	n/a	n/a	n/a
11010416_A02	Extract	2014-11-25	0.924804	0.749662	0.837233	2014-12-05	0.988379	0.984397	0.918603	0.918603	0.887856	0.90323	no	no	n/a	n/a	n/a	n/a	n/a	n/a	n/a	n/a	n/a
11010216_G12	Extract	2014-11-25	0.914368	0.760038	0.837203	2014-12-05	0.93997	0.971373	0.816701	0.816701	0.855522	0.836112	no	no	n/a	n/a	n/a	n/a	n/a	n/a	n/a	n/a	n/a
11010216_E12	Extract	2014-11-25	0.845712	0.828193	0.836953	2014-12-05	0.922385	0.88328	0.857425	0.857425	0.879778	0.868601	no	no	n/a	n/a	n/a	n/a	n/a	n/a	n/a	n/a	n/a
11090206_D06	Extract	2014-11-19	0.749767	0.92409	0.836929	2014-12-04	0.875571	0.944027	0.997919	0.997919	0.985514	0.991716	no	no	n/a	n/a	n/a	n/a	n/a	n/a	n/a	n/a	n/a
11090301_A07	Extract	2014-11-19	0.892769	0.780859	0.836814	2014-12-05	0.927118	0.975566	0.813851	0.813851	1.05913	0.936491	no	no	n/a	n/a	n/a	n/a	n/a	n/a	n/a	n/a	n/a
11040208_H10	Extract	2014-11-19	0.766628	0.90629	0.836459	2014-12-05	0.771836	0.962804	0.719499	0.719499	0.766497	0.742998	no	no	n/a	n/a	n/a	n/a	n/a	n/a	n/a	n/a	n/a
11100807_F10	Extract	2014-11-19	0.877029	0.795444	0.836236	2014-12-04	0.906785	0.883385	0.753341	0.753341	0.837394	0.795368	no	no	n/a	n/a	n/a	n/a	n/a	n/a	n/a	n/a	n/a
11020711_A08	Extract	2014-11-24	0.936751	0.73571	0.836231	2014-12-05	0.958518	1.10593	0.885848	0.885848	0.897831	0.89184	no	no	n/a	n/a	n/a	n/a	n/a	n/a	n/a	n/a	n/a
11010416_A11	Extract	2014-11-25	0.87863	0.792952	0.835791	2014-12-05	0.963742	0.83017	0.857091	0.857091	0.800957	0.829024	no	no	n/a	n/a	n/a	n/a	n/a	n/a	n/a	n/a	n/a
11100807_H09	Extract	2014-11-19	0.819121	0.852324	0.835722	2014-12-04	0.919245	0.89599	0.852744	0.852744	0.968966	0.910855	no	no	n/a	n/a	n/a	n/a	n/a	n/a	n/a	n/a	n/a
11040302_D04	Extract	2014-11-19	0.83698	0.833663	0.835322	2014-12-05	0.877426	0.927641	0.671419	0.671419	0.579892	0.625656	no	no	n/a	n/a	n/a	n/a	n/a	n/a	n/a	n/a	n/a
11010216_F09	Extract	2014-11-25	0.931599	0.738954	0.835277	2014-12-05	0.862119	0.97483	0.94115	0.94115	0.861643	0.901397	no	no	n/a	n/a	n/a	n/a	n/a	n/a	n/a	n/a	n/a
11010119_H12	Extract	2014-11-25	0.862139	0.807889	0.835014	2014-12-05	0.799311	0.751717	0.8022	0.8022	0.866185	0.834192	no	no	n/a	n/a	n/a	n/a	n/a	n/a	n/a	n/a	n/a
11040303_H02	Extract	2014-11-19	0.855611	0.813898	0.834755	2014-12-05	0.878533	0.971294	0.880878	0.880878	0.89105	0.885964	no	no	n/a	n/a	n/a	n/a	n/a	n/a	n/a	n/a	n/a
11020708_G05	Extract	2014-11-24	0.786628	0.882744	0.834686	2014-12-05	1.14416	1.14118	0.878946	0.878946	0.903217	0.891082	no	no	n/a	n/a	n/a	n/a	n/a	n/a	n/a	n/a	n/a
11010416_G09	Extract	2014-11-25	0.908504	0.759878	0.834191	2014-12-05	0.748095	0.961099	0.764754	0.764754	0.607921	0.686338	no	no	n/a	n/a	n/a	n/a	n/a	n/a	n/a	n/a	n/a
11020709_E08	Extract	2014-11-24	0.856554	0.811	0.833777	2014-12-05	0.962019	1.21801	0.91459	0.91459	1.06205	0.988322	no	no	n/a	n/a	n/a	n/a	n/a	n/a	n/a	n/a	n/a
11090201_G07	Extract	2014-11-19	0.836723	0.830051	0.833387	2014-12-04	0.866604	0.774537	0.886089	0.886089	0.922661	0.904375	no	no	n/a	n/a	n/a	n/a	n/a	n/a	n/a	n/a	n/a
11100305_C09	Extract	2014-11-19	0.929141	0.737398	0.833269	2014-12-04	0.803111	0.805867	0.780835	0.780835	0.804753	0.792794	no	no	n/a	n/a	n/a	n/a	n/a	n/a	n/a	n/a	n/a
11020708_A02	Extract	2014-11-24	0.79315	0.873314	0.833232	2014-12-05	0.829281	0.778925	0.916978	0.916978	0.930145	0.923561	no	no	n/a	n/a	n/a	n/a	n/a	n/a	n/a	n/a	n/a
11010119_B08	Extract	2014-11-25	0.84732	0.818983	0.833152	2014-12-05	0.826482	0.979947	0.933872	0.933872	0.905967	0.919919	no	no	n/a	n/a	n/a	n/a	n/a	n/a	n/a	n/a	n/a
11020709_G08	Extract	2014-11-24	0.839544	0.826313	0.832928	2014-12-05	1.09269	1.12346	0.738593	0.738593	1.06103	0.899812	no	no	n/a	n/a	n/a	n/a	n/a	n/a	n/a	n/a	n/a
11100302_A12	Extract	2014-11-19	1.0052	0.660541	0.832869	2014-11-21	0.816187	0.824941	0.85705	0.85705	0.882383	0.869717	no	no	n/a	n/a	n/a	n/a	n/a	n/a	n/a	n/a	n/a
11100702_D05	Extract	2014-11-19	0.776998	0.888677	0.832837	2014-11-20	1.06819	1.10936	0.800331	0.800331	0.900907	0.850619	no	no	n/a	n/a	n/a	n/a	n/a	n/a	n/a	n/a	n/a
11100305_C06	Extract	2014-11-19	0.928463	0.736716	0.832589	2014-12-04	0.950867	0.840865	0.88065	0.88065	0.835482	0.858066	no	no	n/a	n/a	n/a	n/a	n/a	n/a	n/a	n/a	n/a
11020901_A04	Extract	2014-11-24	0.828883	0.836181	0.832532	2014-12-05	0.794536	0.882468	0.9764	0.9764	0.904238	0.940319	no	no	n/a	n/a	n/a	n/a	n/a	n/a	n/a	n/a	n/a
11010535_B10	Extract	2014-11-25	0.836586	0.828453	0.83252	2014-12-05	0.893983	0.922193	0.838832	0.838832	0.789685	0.814258	no	no	n/a	n/a	n/a	n/a	n/a	n/a	n/a	n/a	n/a
11100205_G07	Extract	2014-11-19	1.05051	0.613483	0.831996	2014-11-21	0.865056	1.11323	0.961985	0.961985	0.945656	0.953821	no	no	n/a	n/a	n/a	n/a	n/a	n/a	n/a	n/a	n/a
11100905_E02	Extract	2014-11-19	0.879877	0.780083	0.82998	2014-12-04	0.940314	0.896908	0.89876	0.89876	0.757507	0.828133	no	no	n/a	n/a	n/a	n/a	n/a	n/a	n/a	n/a	n/a
11010119_D07	Extract	2014-11-25	0.844908	0.814648	0.829778	2014-12-05	0.86072	0.924076	0.827868	0.827868	0.911765	0.869816	no	no	n/a	n/a	n/a	n/a	n/a	n/a	n/a	n/a	n/a
11090302_H08	Extract	2014-11-19	0.734875	0.923895	0.829385	2014-12-05	0.847044	0.847036	0.849333	0.849333	0.839354	0.844344	no	no	n/a	n/a	n/a	n/a	n/a	n/a	n/a	n/a	n/a
11090204_D12	Extract	2014-11-19	0.908966	0.749472	0.829219	2014-12-04	0.905197	0.975219	0.881379	0.881379	0.896068	0.888724	no	no	n/a	n/a	n/a	n/a	n/a	n/a	n/a	n/a	n/a
11010216_H12	Extract	2014-11-25	0.826606	0.831424	0.829015	2014-12-05	0.734405	0.778799	0.743059	0.743059	0.804112	0.773585	no	no	n/a	n/a	n/a	n/a	n/a	n/a	n/a	n/a	n/a
11010216_A12	Extract	2014-11-25	0.841666	0.816021	0.828844	2014-12-05	1.06596	0.791084	0.872481	0.872481	1.00979	0.941134	no	no	n/a	n/a	n/a	n/a	n/a	n/a	n/a	n/a	n/a
11020901_E04	Extract	2014-11-24	0.885525	0.771989	0.828757	2014-12-05	0.798037	0.947232	0.695622	0.695622	0.813475	0.754548	no	no	n/a	n/a	n/a	n/a	n/a	n/a	n/a	n/a	n/a
11100304_F10	Extract	2014-11-19	0.857448	0.800029	0.828739	2014-12-04	0.824679	0.839911	0.882874	0.882874	0.825971	0.854423	no	no	n/a	n/a	n/a	n/a	n/a	n/a	n/a	n/a	n/a
11040303_C06	Extract	2014-11-19	0.79091	0.866052	0.828481	2014-12-05	0.940237	1.10474	0.694473	0.694473	0.777699	0.736086	no	no	n/a	n/a	n/a	n/a	n/a	n/a	n/a	n/a	n/a
11040209_G12	Extract	2014-11-19	0.854442	0.802336	0.828389	2014-12-05	0.893253	0.918428	0.73297	0.73297	0.782228	0.757599	no	no	n/a	n/a	n/a	n/a	n/a	n/a	n/a	n/a	n/a
11040209_C07	Extract	2014-11-19	0.755247	0.901481	0.828364	2014-12-05	0.816828	0.971535	0.659864	0.659864	0.741344	0.700604	no	no	n/a	n/a	n/a	n/a	n/a	n/a	n/a	n/a	n/a
11010402_B10	Extract	2014-11-25	0.784602	0.871474	0.828038	2014-12-05	0.870404	0.802576	0.80341	0.80341	0.665317	0.734364	no	no	n/a	n/a	n/a	n/a	n/a	n/a	n/a	n/a	n/a
11020711_G08	Extract	2014-11-24	0.857854	0.798004	0.827929	2014-12-05	1.05788	1.12134	0.981623	0.981623	1.02895	1.00529	no	no	n/a	n/a	n/a	n/a	n/a	n/a	n/a	n/a	n/a
11090205_E03	Extract	2014-11-19	0.932671	0.722903	0.827787	2014-12-04	0.650678	0.775555	0.753017	0.753017	0.831152	0.792084	no	no	n/a	n/a	n/a	n/a	n/a	n/a	n/a	n/a	n/a
11090204_H08	Extract	2014-11-19	0.850258	0.804794	0.827526	2014-12-04	0.909433	0.794737	0.941832	0.941832	0.95579	0.948811	no	no	n/a	n/a	n/a	n/a	n/a	n/a	n/a	n/a	n/a
11100806_F07	Extract	2014-11-19	0.815356	0.8396	0.827478	2014-11-20	1.17812	1.04337	0.932812	0.932812	1.01435	0.973583	no	no	n/a	n/a	n/a	n/a	n/a	n/a	n/a	n/a	n/a
11090302_B06	Extract	2014-11-19	0.991179	0.662946	0.827063	2014-12-05	0.673021	1.00197	0.69908	0.69908	0.720614	0.709847	no	no	n/a	n/a	n/a	n/a	n/a	n/a	n/a	n/a	n/a
11100701_C09	Extract	2014-11-19	0.981484	0.672515	0.826999	2014-12-04	0.978476	0.84807	0.816669	0.816669	0.99611	0.90639	no	no	n/a	n/a	n/a	n/a	n/a	n/a	n/a	n/a	n/a
11100905_E07	Extract	2014-11-19	0.867677	0.785935	0.826806	2014-12-04	0.909489	0.925497	0.833711	0.833711	0.711965	0.772838	no	no	n/a	n/a	n/a	n/a	n/a	n/a	n/a	n/a	n/a
11010402_D07	Extract	2014-11-25	0.836862	0.81671	0.826786	2014-12-05	1.2274	0.768911	0.839901	0.839901	0.634146	0.737024	no	no	n/a	n/a	n/a	n/a	n/a	n/a	n/a	n/a	n/a
11100206_E02	Extract	2014-11-19	0.971811	0.68136	0.826586	2014-11-21	0.558561	0.804727	0.507468	0.507468	0.866794	0.687131	no	no	n/a	n/a	n/a	n/a	n/a	n/a	n/a	n/a	n/a
11020901_C06	Extract	2014-11-24	0.841732	0.811209	0.826471	2014-12-05	0.993741	0.976845	0.908421	0.908421	0.939129	0.923775	no	no	n/a	n/a	n/a	n/a	n/a	n/a	n/a	n/a	n/a
11100305_D08	Extract	2014-11-19	1.04332	0.608542	0.825929	2014-12-04	0.814145	0.826002	0.863295	0.863295	0.85976	0.861528	no	no	n/a	n/a	n/a	n/a	n/a	n/a	n/a	n/a	n/a
11100701_H10	Extract	2014-11-19	0.745154	0.90659	0.825872	2014-12-04	0.80034	0.831513	0.724598	0.724598	0.804475	0.764536	no	no	n/a	n/a	n/a	n/a	n/a	n/a	n/a	n/a	n/a
11020711_G11	Extract	2014-11-24	0.890314	0.760661	0.825488	2014-12-05	0.918055	0.974153	0.861125	0.861125	0.956332	0.908729	no	no	n/a	n/a	n/a	n/a	n/a	n/a	n/a	n/a	n/a
11100305_D03	Extract	2014-11-19	0.986338	0.664052	0.825195	2014-12-04	0.867566	0.772563	0.843689	0.843689	0.812011	0.82785	no	no	n/a	n/a	n/a	n/a	n/a	n/a	n/a	n/a	n/a
11100906_A06	Extract	2014-11-19	0.847156	0.803231	0.825194	2014-12-04	0.938286	0.955452	1.01014	1.01014	0.980526	0.995333	no	no	n/a	n/a	n/a	n/a	n/a	n/a	n/a	n/a	n/a
11090206_H12	Extract	2014-11-19	0.919617	0.730594	0.825105	2014-12-04	0.865613	0.825649	0.822204	0.822204	0.917466	0.869835	no	no	n/a	n/a	n/a	n/a	n/a	n/a	n/a	n/a	n/a
11020709_H02	Extract	2014-11-24	0.810356	0.83931	0.824833	2014-12-05	0.666081	0.940702	0.480246	0.480246	0.625899	0.553073	no	no	n/a	n/a	n/a	n/a	n/a	n/a	n/a	n/a	n/a
11090501_A07	Extract	2014-11-19	0.943307	0.706064	0.824686	2014-12-05	1.0165	1.02044	0.926464	0.926464	0.931798	0.929131	no	no	n/a	n/a	n/a	n/a	n/a	n/a	n/a	n/a	n/a
11100206_B04	Extract	2014-11-19	1.07153	0.577557	0.824542	2014-11-21	0.75935	0.97374	0.749792	0.749792	1.04491	0.897349	no	no	n/a	n/a	n/a	n/a	n/a	n/a	n/a	n/a	n/a
11100303_E06	Extract	2014-11-19	0.99622	0.652859	0.82454	2014-12-04	0.928276	0.64488	0.821365	0.821365	0.899166	0.860265	no	no	n/a	n/a	n/a	n/a	n/a	n/a	n/a	n/a	n/a
11020711_G10	Extract	2014-11-24	0.858504	0.789826	0.824165	2014-12-05	0.836499	1.02878	0.782982	0.782982	0.917332	0.850157	no	no	n/a	n/a	n/a	n/a	n/a	n/a	n/a	n/a	n/a
11040302_H06	Extract	2014-11-19	0.835616	0.811953	0.823785	2014-12-05	0.894941	0.932247	0.820094	0.820094	0.862879	0.841486	no	no	n/a	n/a	n/a	n/a	n/a	n/a	n/a	n/a	n/a
11010402_E10	Extract	2014-11-25	0.8764	0.771022	0.823711	2014-12-05	0.945838	0.832868	0.761787	0.761787	0.769182	0.765484	no	no	n/a	n/a	n/a	n/a	n/a	n/a	n/a	n/a	n/a
11100702_F04	Extract	2014-11-19	0.904071	0.743067	0.823569	2014-11-20	0.957218	0.875974	0.701646	0.701646	0.771847	0.736747	no	no	n/a	n/a	n/a	n/a	n/a	n/a	n/a	n/a	n/a
11010402_F11	Extract	2014-11-25	0.827473	0.819136	0.823304	2014-12-05	0.812358	0.783596	0.763685	0.763685	0.707731	0.735708	no	no	n/a	n/a	n/a	n/a	n/a	n/a	n/a	n/a	n/a
11020709_F12	Extract	2014-11-24	0.854799	0.791077	0.822938	2014-12-05	0.454201	0.681207	0.426686	0.426686	0.488912	0.457799	no	no	n/a	n/a	n/a	n/a	n/a	n/a	n/a	n/a	n/a
11020709_F09	Extract	2014-11-24	0.865482	0.780167	0.822824	2014-12-05	0.890725	1.19413	0.911494	0.911494	0.955541	0.933518	no	no	n/a	n/a	n/a	n/a	n/a	n/a	n/a	n/a	n/a
11010402_F12	Extract	2014-11-25	0.729617	0.915993	0.822805	2014-12-05	0.778408	0.793761	0.858721	0.858721	0.807887	0.833304	no	no	n/a	n/a	n/a	n/a	n/a	n/a	n/a	n/a	n/a
11100807_C03	Extract	2014-11-19	0.872767	0.772747	0.822757	2014-12-04	0.87053	0.898922	0.949804	0.949804	0.681311	0.815558	no	no	n/a	n/a	n/a	n/a	n/a	n/a	n/a	n/a	n/a
11100807_D11	Extract	2014-11-19	0.778704	0.866393	0.822549	2014-12-04	0.858069	0.980661	0.881833	0.881833	0.829799	0.855816	no	no	n/a	n/a	n/a	n/a	n/a	n/a	n/a	n/a	n/a
11100905_B05	Extract	2014-11-19	0.817101	0.827455	0.822278	2014-12-04	0.952098	0.965348	0.883939	0.883939	0.871407	0.877673	no	no	n/a	n/a	n/a	n/a	n/a	n/a	n/a	n/a	n/a
11090205_G07	Extract	2014-11-19	0.791791	0.852687	0.822239	2014-12-04	0.9535	0.860936	0.908642	0.908642	0.839099	0.873871	no	no	n/a	n/a	n/a	n/a	n/a	n/a	n/a	n/a	n/a
11090201_H05	Extract	2014-11-19	0.884324	0.760003	0.822164	2014-12-04	0.951271	0.746195	0.937465	0.937465	0.842539	0.890002	no	no	n/a	n/a	n/a	n/a	n/a	n/a	n/a	n/a	n/a
11010216_E04	Extract	2014-11-25	0.831456	0.812763	0.82211	2014-12-05	0.999326	0.975544	1.04415	1.04415	1.02692	1.03554	no	no	n/a	n/a	n/a	n/a	n/a	n/a	n/a	n/a	n/a
11100905_C11	Extract	2014-11-19	0.812011	0.831779	0.821895	2014-12-04	0.879813	0.839505	0.77527	0.77527	0.955288	0.865279	no	no	n/a	n/a	n/a	n/a	n/a	n/a	n/a	n/a	n/a
11020901_B03	Extract	2014-11-24	0.804917	0.838684	0.8218	2014-12-05	0.725265	1.01665	0.808864	0.808864	0.918098	0.863481	no	no	n/a	n/a	n/a	n/a	n/a	n/a	n/a	n/a	n/a
11090304_H12	Extract	2014-11-19	0.789115	0.854307	0.821711	2014-12-05	0.817595	0.841025	0.871279	0.871279	0.892402	0.88184	no	no	n/a	n/a	n/a	n/a	n/a	n/a	n/a	n/a	n/a
11020711_F12	Extract	2014-11-24	0.842382	0.799881	0.821132	2014-12-05	0.851588	0.997237	0.79343	0.79343	0.776797	0.785113	no	no	n/a	n/a	n/a	n/a	n/a	n/a	n/a	n/a	n/a
11020711_A11	Extract	2014-11-24	0.836055	0.806181	0.821118	2014-12-05	0.501752	0.789866	0.390215	0.390215	0.508872	0.449543	no	no	n/a	n/a	n/a	n/a	n/a	n/a	n/a	n/a	n/a
11040209_A10	Extract	2014-11-19	0.837175	0.804829	0.821002	2014-12-05	0.944416	0.862668	0.835208	0.835208	0.839206	0.837207	no	no	n/a	n/a	n/a	n/a	n/a	n/a	n/a	n/a	n/a
11090206_C09	Extract	2014-11-19	0.743011	0.898833	0.820922	2014-12-04	0.922363	0.912811	0.996359	0.996359	0.879831	0.938095	no	no	n/a	n/a	n/a	n/a	n/a	n/a	n/a	n/a	n/a
11100906_H10	Extract	2014-11-19	0.873373	0.767971	0.820672	2014-12-04	0.846059	0.910407	0.839792	0.839792	0.948601	0.894197	no	no	n/a	n/a	n/a	n/a	n/a	n/a	n/a	n/a	n/a
11100905_A12	Extract	2014-11-19	0.833138	0.807986	0.820562	2014-12-04	0.957776	0.822624	0.860405	0.860405	0.989634	0.925019	no	no	n/a	n/a	n/a	n/a	n/a	n/a	n/a	n/a	n/a
11040303_G09	Extract	2014-11-19	0.720577	0.919991	0.820284	2014-12-05	0.841012	0.95528	0.770618	0.770618	0.734369	0.752493	no	no	n/a	n/a	n/a	n/a	n/a	n/a	n/a	n/a	n/a
11010416_F11	Extract	2014-11-25	0.850959	0.789357	0.820158	2014-12-05	0.739814	0.815462	0.52012	0.52012	0.753596	0.636858	no	no	n/a	n/a	n/a	n/a	n/a	n/a	n/a	n/a	n/a
11090304_G08	Extract	2014-11-19	0.83474	0.80541	0.820075	2014-12-05	0.914993	0.992598	0.848492	0.848492	0.955241	0.901867	no	no	n/a	n/a	n/a	n/a	n/a	n/a	n/a	n/a	n/a
11100805_C05	Extract	2014-11-19	0.952884	0.685791	0.819338	2014-11-20	0.966506	1.10694	0.743679	0.743679	0.75648	0.750079	no	no	n/a	n/a	n/a	n/a	n/a	n/a	n/a	n/a	n/a
11010119_C04	Extract	2014-11-25	0.870474	0.767605	0.819039	2014-12-05	1.00378	0.978541	0.880592	0.880592	0.912119	0.896356	no	no	n/a	n/a	n/a	n/a	n/a	n/a	n/a	n/a	n/a
11040209_C02	Extract	2014-11-19	0.772884	0.865168	0.819026	2014-12-05	0.912733	0.885218	0.743402	0.743402	0.750131	0.746766	no	no	n/a	n/a	n/a	n/a	n/a	n/a	n/a	n/a	n/a
11020901_D03	Extract	2014-11-24	0.85196	0.78605	0.819005	2014-12-05	0.943646	1.04493	0.860179	0.860179	1.02254	0.94136	no	no	n/a	n/a	n/a	n/a	n/a	n/a	n/a	n/a	n/a
11090304_C12	Extract	2014-11-19	0.857321	0.780631	0.818976	2014-12-05	0.876516	1.02165	0.992916	0.992916	0.786664	0.88979	no	no	n/a	n/a	n/a	n/a	n/a	n/a	n/a	n/a	n/a
11020709_B11	Extract	2014-11-24	0.857421	0.77975	0.818585	2014-12-05	0.865569	1.11941	0.767075	0.767075	0.841934	0.804504	no	no	n/a	n/a	n/a	n/a	n/a	n/a	n/a	n/a	n/a
11100905_H10	Extract	2014-11-19	0.740327	0.896469	0.818398	2014-12-04	0.681007	0.821259	0.7565	0.7565	0.766313	0.761406	no	no	n/a	n/a	n/a	n/a	n/a	n/a	n/a	n/a	n/a
11010402_D10	Extract	2014-11-25	0.842396	0.792653	0.817524	2014-12-05	0.734628	0.71966	0.751067	0.751067	0.591185	0.671126	no	no	n/a	n/a	n/a	n/a	n/a	n/a	n/a	n/a	n/a
11020711_B05	Extract	2014-11-24	0.916035	0.718729	0.817382	2014-12-05	0.702544	1.04128	0.82645	0.82645	0.945791	0.88612	no	no	n/a	n/a	n/a	n/a	n/a	n/a	n/a	n/a	n/a
11100701_F07	Extract	2014-11-19	0.876142	0.758192	0.817167	2014-12-04	0.923508	0.80131	0.838197	0.838197	0.813123	0.82566	no	no	n/a	n/a	n/a	n/a	n/a	n/a	n/a	n/a	n/a
11010535_F11	Extract	2014-11-25	0.793468	0.840467	0.816968	2014-12-05	0.843445	0.846204	0.546933	0.546933	0.739477	0.643205	no	no	n/a	n/a	n/a	n/a	n/a	n/a	n/a	n/a	n/a
11040303_A12	Extract	2014-11-19	0.791125	0.841301	0.816213	2014-12-05	0.928837	0.977106	0.766209	0.766209	0.954429	0.860319	no	no	n/a	n/a	n/a	n/a	n/a	n/a	n/a	n/a	n/a
11100903_D10	Extract	2014-11-19	0.844106	0.787656	0.815881	2014-12-04	0.797141	0.829139	0.720566	0.720566	0.814306	0.767436	no	no	n/a	n/a	n/a	n/a	n/a	n/a	n/a	n/a	n/a
11010416_D11	Extract	2014-11-25	0.788209	0.843493	0.815851	2014-12-05	0.758982	0.805972	0.812794	0.812794	0.508427	0.66061	no	no	n/a	n/a	n/a	n/a	n/a	n/a	n/a	n/a	n/a
11090302_A04	Extract	2014-11-19	0.805505	0.826079	0.815792	2014-12-05	1.10901	0.995008	0.847343	0.847343	0.850444	0.848893	no	no	n/a	n/a	n/a	n/a	n/a	n/a	n/a	n/a	n/a
11100701_B02	Extract	2014-11-19	0.893721	0.737853	0.815787	2014-12-04	0.953613	0.740212	0.94301	0.94301	0.842184	0.892597	no	no	n/a	n/a	n/a	n/a	n/a	n/a	n/a	n/a	n/a
11010216_H09	Extract	2014-11-25	0.88071	0.74951	0.81511	2014-12-05	0.850621	0.807057	0.845146	0.845146	0.826757	0.835952	no	no	n/a	n/a	n/a	n/a	n/a	n/a	n/a	n/a	n/a
11100906_F03	Extract	2014-11-19	0.910982	0.7189	0.814941	2014-12-04	0.946217	0.840176	0.86359	0.86359	0.704672	0.784131	no	no	n/a	n/a	n/a	n/a	n/a	n/a	n/a	n/a	n/a
11100305_E10	Extract	2014-11-19	0.939898	0.689873	0.814886	2014-12-04	0.89465	0.843275	0.808679	0.808679	0.85531	0.831994	no	no	n/a	n/a	n/a	n/a	n/a	n/a	n/a	n/a	n/a
11090302_F03	Extract	2014-11-19	0.818129	0.811622	0.814876	2014-12-05	0.87056	0.979407	0.760964	0.760964	0.867694	0.814329	no	no	n/a	n/a	n/a	n/a	n/a	n/a	n/a	n/a	n/a
11090206_G05	Extract	2014-11-19	0.789627	0.839949	0.814788	2014-12-04	0.836235	0.838675	0.95406	0.95406	0.935424	0.944742	no	no	n/a	n/a	n/a	n/a	n/a	n/a	n/a	n/a	n/a
11020708_B04	Extract	2014-11-24	0.873976	0.755425	0.8147	2014-12-05	0.837369	1.00646	0.806028	0.806028	0.884227	0.845128	no	no	n/a	n/a	n/a	n/a	n/a	n/a	n/a	n/a	n/a
11010416_G03	Extract	2014-11-25	0.829125	0.799273	0.814199	2014-12-05	0.766489	1.01111	0.776009	0.776009	0.764294	0.770151	no	no	n/a	n/a	n/a	n/a	n/a	n/a	n/a	n/a	n/a
11010119_F10	Extract	2014-11-25	0.836306	0.791948	0.814127	2014-12-05	0.834692	0.878416	0.84598	0.84598	0.875881	0.86093	no	no	n/a	n/a	n/a	n/a	n/a	n/a	n/a	n/a	n/a
11090301_H03	Extract	2014-11-19	0.830312	0.797851	0.814081	2014-12-05	0.930687	0.869078	0.860572	0.860572	0.828946	0.844759	no	no	n/a	n/a	n/a	n/a	n/a	n/a	n/a	n/a	n/a
11090302_H11	Extract	2014-11-19	0.825884	0.801048	0.813466	2014-12-05	0.830901	0.864283	0.802052	0.802052	0.843278	0.822665	no	no	n/a	n/a	n/a	n/a	n/a	n/a	n/a	n/a	n/a
11100903_B11	Extract	2014-11-19	0.835986	0.790904	0.813445	2014-12-04	1.09836	0.950034	0.845873	0.845873	0.95895	0.902412	no	no	n/a	n/a	n/a	n/a	n/a	n/a	n/a	n/a	n/a
11100807_C07	Extract	2014-11-19	0.959963	0.666624	0.813293	2014-12-04	0.994708	1.06515	0.948751	0.948751	0.753876	0.851313	no	no	n/a	n/a	n/a	n/a	n/a	n/a	n/a	n/a	n/a
11040208_H05	Extract	2014-11-19	0.734102	0.89204	0.813071	2014-12-05	0.946629	0.877211	0.757968	0.757968	0.80892	0.783444	no	no	n/a	n/a	n/a	n/a	n/a	n/a	n/a	n/a	n/a
11100303_B07	Extract	2014-11-19	0.866238	0.759557	0.812897	2014-12-04	0.91522	0.965829	0.832953	0.832953	0.86788	0.850416	no	no	n/a	n/a	n/a	n/a	n/a	n/a	n/a	n/a	n/a
11090205_D08	Extract	2014-11-19	0.886993	0.737826	0.812409	2014-12-04	0.813843	0.888031	0.849749	0.849749	0.87467	0.862209	no	no	n/a	n/a	n/a	n/a	n/a	n/a	n/a	n/a	n/a
11010416_A03	Extract	2014-11-25	0.808942	0.815811	0.812377	2014-12-05	1.01069	0.900694	0.882086	0.882086	0.801532	0.841809	no	no	n/a	n/a	n/a	n/a	n/a	n/a	n/a	n/a	n/a
11040208_H12	Extract	2014-11-19	0.772689	0.851272	0.81198	2014-12-05	0.855455	0.87914	0.69806	0.69806	0.768006	0.733033	no	no	n/a	n/a	n/a	n/a	n/a	n/a	n/a	n/a	n/a
11090201_F12	Extract	2014-11-19	0.793498	0.83027	0.811884	2014-12-04	0.852906	0.878821	0.830346	0.830346	0.907111	0.868729	no	no	n/a	n/a	n/a	n/a	n/a	n/a	n/a	n/a	n/a
11090201_C09	Extract	2014-11-19	0.842998	0.78065	0.811824	2014-12-04	0.930587	1.00412	1.07846	1.07846	1.00313	1.04079	no	no	n/a	n/a	n/a	n/a	n/a	n/a	n/a	n/a	n/a
11040302_B08	Extract	2014-11-19	0.774267	0.849133	0.8117	2014-12-05	0.9383	0.94995	0.776669	0.776669	0.860433	0.818551	no	no	n/a	n/a	n/a	n/a	n/a	n/a	n/a	n/a	n/a
11010416_E08	Extract	2014-11-25	0.918719	0.704274	0.811497	2014-12-05	0.870146	0.921069	0.688271	0.688271	0.62204	0.655155	no	no	n/a	n/a	n/a	n/a	n/a	n/a	n/a	n/a	n/a
11100302_C06	Extract	2014-11-19	1.10004	0.522946	0.811491	2014-11-21	0.57797	0.958574	0.600967	0.600967	0.751759	0.676363	no	no	n/a	n/a	n/a	n/a	n/a	n/a	n/a	n/a	n/a
11100804_E12	Extract	2014-11-19	0.797622	0.825301	0.811461	2014-11-20	1.00614	1.16989	0.875277	0.875277	1.12388	0.99958	no	no	n/a	n/a	n/a	n/a	n/a	n/a	n/a	n/a	n/a
11090206_A05	Extract	2014-11-19	0.880694	0.741999	0.811347	2014-12-04	0.862864	0.960641	0.851963	0.851963	0.943371	0.897667	no	no	n/a	n/a	n/a	n/a	n/a	n/a	n/a	n/a	n/a
11100903_G04	Extract	2014-11-19	0.842894	0.779653	0.811274	2014-12-04	1.11197	0.985183	1.01517	1.01517	0.861088	0.938128	no	no	n/a	n/a	n/a	n/a	n/a	n/a	n/a	n/a	n/a
11020709_F11	Extract	2014-11-24	0.839977	0.782065	0.811021	2014-12-05	0.890051	1.10593	0.889867	0.889867	0.926316	0.908091	no	no	n/a	n/a	n/a	n/a	n/a	n/a	n/a	n/a	n/a
11020708_E11	Extract	2014-11-24	0.864398	0.757323	0.810861	2014-12-05	0.807429	1.20472	0.85947	0.85947	0.923738	0.891604	no	no	n/a	n/a	n/a	n/a	n/a	n/a	n/a	n/a	n/a
11040208_A12	Extract	2014-11-19	0.87052	0.751101	0.810811	2014-12-05	1.00615	0.859508	0.792878	0.792878	0.861037	0.826957	no	no	n/a	n/a	n/a	n/a	n/a	n/a	n/a	n/a	n/a
11010119_A10	Extract	2014-11-25	0.818003	0.803042	0.810523	2014-12-05	0.945357	0.915041	0.81195	0.81195	0.836775	0.824363	no	no	n/a	n/a	n/a	n/a	n/a	n/a	n/a	n/a	n/a
11020709_E04	Extract	2014-11-24	0.818633	0.802405	0.810519	2014-12-05	1.47655	1.36411	1.72381	1.72381	1.40923	1.56652	no	no	n/a	n/a	n/a	n/a	n/a	n/a	n/a	n/a	n/a
11100302_H06	Extract	2014-11-19	0.924084	0.696697	0.810391	2014-11-21	0.900225	0.911961	0.878304	0.878304	1.06274	0.970524	no	no	n/a	n/a	n/a	n/a	n/a	n/a	n/a	n/a	n/a
11100906_B04	Extract	2014-11-19	0.900601	0.719782	0.810191	2014-12-04	0.750498	0.913788	0.764161	0.764161	0.644878	0.704519	no	no	n/a	n/a	n/a	n/a	n/a	n/a	n/a	n/a	n/a
11100702_F08	Extract	2014-11-19	0.862581	0.757146	0.809864	2014-11-20	0.911153	1.09181	0.850684	0.850684	0.990997	0.920841	no	no	n/a	n/a	n/a	n/a	n/a	n/a	n/a	n/a	n/a
11010402_D08	Extract	2014-11-25	0.768302	0.851312	0.809807	2014-12-05	0.581103	0.816384	0.66921	0.66921	0.521395	0.595303	no	no	n/a	n/a	n/a	n/a	n/a	n/a	n/a	n/a	n/a
11020901_G11	Extract	2014-11-24	0.798156	0.821077	0.809616	2014-12-05	0.557804	0.835384	0.436637	0.436637	0.738358	0.587497	no	no	n/a	n/a	n/a	n/a	n/a	n/a	n/a	n/a	n/a
11100906_G12	Extract	2014-11-19	0.866869	0.752202	0.809536	2014-12-04	0.88094	0.830281	0.903525	0.903525	0.922759	0.913142	no	no	n/a	n/a	n/a	n/a	n/a	n/a	n/a	n/a	n/a
11040208_C05	Extract	2014-11-19	0.79052	0.828501	0.809511	2014-12-05	0.921062	1.03533	0.699429	0.699429	0.799832	0.74963	no	no	n/a	n/a	n/a	n/a	n/a	n/a	n/a	n/a	n/a
11010119_H08	Extract	2014-11-25	0.821755	0.797091	0.809423	2014-12-05	0.873361	0.838104	0.877787	0.877787	0.867151	0.872469	no	no	n/a	n/a	n/a	n/a	n/a	n/a	n/a	n/a	n/a
11010119_H09	Extract	2014-11-25	0.812617	0.805466	0.809041	2014-12-05	0.867507	0.852002	0.815312	0.815312	0.825758	0.820535	no	no	n/a	n/a	n/a	n/a	n/a	n/a	n/a	n/a	n/a
11040209_H11	Extract	2014-11-19	0.684154	0.93371	0.808932	2014-12-05	0.923829	0.982677	0.745866	0.745866	0.890446	0.818156	no	no	n/a	n/a	n/a	n/a	n/a	n/a	n/a	n/a	n/a
11090201_H02	Extract	2014-11-19	0.842036	0.775363	0.8087	2014-12-04	0.898212	0.889049	0.749274	0.749274	0.849798	0.799536	no	no	n/a	n/a	n/a	n/a	n/a	n/a	n/a	n/a	n/a
11100205_D11	Extract	2014-11-19	0.922766	0.694374	0.80857	2014-11-21	0.958873	0.83967	0.784674	0.784674	0.866516	0.825595	no	no	n/a	n/a	n/a	n/a	n/a	n/a	n/a	n/a	n/a
11090501_A06	Extract	2014-11-19	0.89365	0.723056	0.808353	2014-12-05	1.01984	1.08406	0.839187	0.839187	0.83676	0.837974	no	no	n/a	n/a	n/a	n/a	n/a	n/a	n/a	n/a	n/a
11020708_B02	Extract	2014-11-24	0.83781	0.778706	0.808258	2014-12-05	0.520515	0.883422	0.418626	0.418626	0.518086	0.468356	no	no	n/a	n/a	n/a	n/a	n/a	n/a	n/a	n/a	n/a
11010216_G08	Extract	2014-11-25	0.823926	0.792486	0.808206	2014-12-05	0.847123	0.933572	0.909316	0.909316	0.81574	0.862528	no	no	n/a	n/a	n/a	n/a	n/a	n/a	n/a	n/a	n/a
11090201_D10	Extract	2014-11-19	0.817875	0.79778	0.807828	2014-12-04	0.840719	0.840481	0.973151	0.973151	0.830464	0.901807	no	no	n/a	n/a	n/a	n/a	n/a	n/a	n/a	n/a	n/a
11100302_H05	Extract	2014-11-19	1.09474	0.520226	0.807485	2014-11-21	0.925442	1.00914	0.681907	0.681907	1.0223	0.852103	no	no	n/a	n/a	n/a	n/a	n/a	n/a	n/a	n/a	n/a
11100102_D03	Extract	2014-11-19	1.06577	0.548996	0.807385	2014-11-21	0.609366	1.05799	0.556423	0.556423	1.05689	0.806657	no	no	n/a	n/a	n/a	n/a	n/a	n/a	n/a	n/a	n/a
11100804_A07	Extract	2014-11-19	0.90052	0.714129	0.807325	2014-11-20	1.09832	0.992743	1.08433	1.08433	1.09278	1.08856	no	no	n/a	n/a	n/a	n/a	n/a	n/a	n/a	n/a	n/a
11100205_H07	Extract	2014-11-19	0.88389	0.730552	0.807221	2014-11-21	0.88851	0.839015	0.872246	0.872246	1.04238	0.957315	no	no	n/a	n/a	n/a	n/a	n/a	n/a	n/a	n/a	n/a
11020711_A04	Extract	2014-11-24	0.877465	0.736128	0.806796	2014-12-05	0.890725	1.16043	1.00873	1.00873	0.941962	0.975348	no	no	n/a	n/a	n/a	n/a	n/a	n/a	n/a	n/a	n/a
11100903_G10	Extract	2014-11-19	0.867273	0.745921	0.806597	2014-12-04	0.873684	0.84152	0.731123	0.731123	0.791822	0.761472	no	no	n/a	n/a	n/a	n/a	n/a	n/a	n/a	n/a	n/a
11020709_A09	Extract	2014-11-24	0.826911	0.786258	0.806585	2014-12-05	1.0095	1.22032	1.06296	1.06296	0.995588	1.02927	no	no	n/a	n/a	n/a	n/a	n/a	n/a	n/a	n/a	n/a
11090206_G03	Extract	2014-11-19	0.869828	0.742655	0.806241	2014-12-04	0.919638	0.793974	0.81687	0.81687	0.940963	0.878917	no	no	n/a	n/a	n/a	n/a	n/a	n/a	n/a	n/a	n/a
11090206_H02	Extract	2014-11-19	0.849537	0.762428	0.805983	2014-12-04	0.812852	0.695618	0.704199	0.704199	0.783195	0.743697	no	no	n/a	n/a	n/a	n/a	n/a	n/a	n/a	n/a	n/a
11020901_E05	Extract	2014-11-24	0.737179	0.874566	0.805873	2014-12-05	0.910184	0.977036	0.847817	0.847817	0.984536	0.916177	no	no	n/a	n/a	n/a	n/a	n/a	n/a	n/a	n/a	n/a
11040302_G03	Extract	2014-11-19	0.758384	0.852527	0.805456	2014-12-05	0.909108	0.969099	0.733791	0.733791	0.832865	0.783328	no	no	n/a	n/a	n/a	n/a	n/a	n/a	n/a	n/a	n/a
11020711_D03	Extract	2014-11-24	0.854799	0.755842	0.80532	2014-12-05	0.985218	1.12634	0.883697	0.883697	0.950666	0.917182	no	no	n/a	n/a	n/a	n/a	n/a	n/a	n/a	n/a	n/a
11001218_A04	Extract	2014-11-25	0.734046	0.874966	0.804506	2014-12-05	0.949812	0.92894	0.77431	0.77431	0.980989	0.877649	no	no	n/a	n/a	n/a	n/a	n/a	n/a	n/a	n/a	n/a
11040208_D12	Extract	2014-11-19	0.821896	0.786867	0.804382	2014-12-05	0.933015	1.00378	0.742854	0.742854	0.870155	0.806505	no	no	n/a	n/a	n/a	n/a	n/a	n/a	n/a	n/a	n/a
11100206_B12	Extract	2014-11-19	0.832209	0.776186	0.804198	2014-11-21	0.94763	0.88801	0.917912	0.917912	0.95653	0.937221	no	no	n/a	n/a	n/a	n/a	n/a	n/a	n/a	n/a	n/a
11001218_H03	Extract	2014-11-25	0.878567	0.729502	0.804034	2014-12-05	0.913242	0.981791	0.898454	0.898454	1.02824	0.963349	no	no	n/a	n/a	n/a	n/a	n/a	n/a	n/a	n/a	n/a
11040303_G11	Extract	2014-11-19	0.797575	0.809814	0.803695	2014-12-05	0.863812	0.833099	0.705206	0.705206	0.828607	0.766907	no	no	n/a	n/a	n/a	n/a	n/a	n/a	n/a	n/a	n/a
11090201_B12	Extract	2014-11-19	0.896177	0.710602	0.803389	2014-12-04	0.803389	0.846612	0.897038	0.897038	0.960641	0.92884	no	no	n/a	n/a	n/a	n/a	n/a	n/a	n/a	n/a	n/a
11090304_A09	Extract	2014-11-19	0.896316	0.709741	0.803028	2014-12-05	0.953967	1.08597	0.937731	0.937731	1.03407	0.985899	no	no	n/a	n/a	n/a	n/a	n/a	n/a	n/a	n/a	n/a
11100805_G11	Extract	2014-11-19	0.841516	0.764386	0.802951	2014-11-20	0.871096	0.894808	0.658759	0.658759	0.836377	0.747568	no	no	n/a	n/a	n/a	n/a	n/a	n/a	n/a	n/a	n/a
11040302_F03	Extract	2014-11-19	0.814627	0.791127	0.802877	2014-12-05	0.943032	0.977106	0.798107	0.798107	0.761937	0.780022	no	no	n/a	n/a	n/a	n/a	n/a	n/a	n/a	n/a	n/a
11090302_D12	Extract	2014-11-19	0.746838	0.858669	0.802753	2014-12-05	0.747778	0.976282	0.869317	0.869317	0.897298	0.883307	no	no	n/a	n/a	n/a	n/a	n/a	n/a	n/a	n/a	n/a
11100303_A03	Extract	2014-11-19	0.820082	0.785401	0.802741	2014-12-04	1.12336	0.952636	1.10118	1.10118	0.942744	1.02196	no	no	n/a	n/a	n/a	n/a	n/a	n/a	n/a	n/a	n/a
11100303_F02	Extract	2014-11-19	0.904063	0.700384	0.802223	2014-12-04	0.881869	0.839911	0.907148	0.907148	0.846634	0.876891	no	no	n/a	n/a	n/a	n/a	n/a	n/a	n/a	n/a	n/a
11040209_D05	Extract	2014-11-19	0.732913	0.871391	0.802152	2014-12-05	0.849064	0.990202	0.766757	0.766757	0.697411	0.732084	no	no	n/a	n/a	n/a	n/a	n/a	n/a	n/a	n/a	n/a
11090204_H10	Extract	2014-11-19	0.887714	0.716108	0.801911	2014-12-04	0.870592	0.800614	0.910202	0.910202	0.91437	0.912286	no	no	n/a	n/a	n/a	n/a	n/a	n/a	n/a	n/a	n/a
[truncated: 2,244 more rows]
